# Supplementary material for: Reconstruction of Eriocheir sinensis Y-organ Genome-Scale Metabolic Network and Differential Analysis After Eyestalk Ablation
Source: Front Genet. 2020 Sep 25;11:532492. doi: 10.3389/fgene.2020.532492 (PMC7545369; doi:10.3389/fgene.2020.532492)
Supplement: Supplementary File 1 — Biomass compositions [file Table_1.XLS]

## Sheet: Sheet1
Nutrients	ammount	unit
protein	7.81	g/100g
fatty	33.7	g/100g
water	54.2	g/100g
carbon hydrate	1.05	g/100g
Nucleotide	4.31	mg/100g
Trace elements	0.74	g/100g
carbon hydrate	amount	unit	cofficient	compound ID
glucose	0.777	g/100g	0.0942	C00267
fructose	0.268	g/100g	0.0325	C02336
amino acids	amount	unit	cofficient	compound ID
ASP	0.6786	g/100g	0.1113	C00049
THR	0.3499	g/100g	0.0641	C00188
SER	0.27775	g/100g	0.0577	C00065
GLU	0.8508	g/100g	0.1263	C00025
GLY	0.38925	g/100g	0.1132	C00037
ALA	0.45235	g/100g	0.1109	C00041
VAL	0.38635	g/100g	0.072	C00183
MET	0.16695	g/100g	0.0244	C00073
ILE	0.29345	g/100g	0.0488	C00407
LEU	0.54125	g/100g	0.0901	C00123
TYR	0.42925	g/100g	0.0517	C00082
PHE	0.3457	g/100g	0.0457	C00079
LYS	0.4455	g/100g	0.0665	C00047
HIS	0.1846	g/100g	0.026	C00135
ARG	0.44565	g/100g	0.0559	C00062
PRO	0.30265	g/100g	0.0574	C00148
TRP	0.0791719	g/100g	0.0085	C00078
CYS	0.066645	g/100g	0.012	C00097
ASN	0.47	g/100g	0.0784	C00152
GLN	0.47	g/100g	0.0709	C00064
fatty acids		amount	unit	cofficient	compound ID
Lauric acid	C12:0	0.0427	g/100g	0.0047	C02679
Tridecylic acid	C13:0	0.0221	g/100g	0.0023	M00001
Myristic acid	C14:0	0.920	g/100g	0.088	C06424
Myristoleic acid	C14:1n5	0.0990	g/100g	0.0095	C08322
Pentadecylic acid	C15:0	0.261	g/100g	0.0235	C16537
Palmitic acid	C16:0	7.55	g/100g	0.6429	C00249
Palmitoleic acid	C16:1n7	3.45	g/100g	0.2961	C08362
Margaric acid	C17:0	0.146	g/100g	0.0118	M00002
cis-10- Heptadecenoic acid	C17:1n7	0.217	g/100g	0.0177	M00003
Stearic acid	C18:0	1.05	g/100g	0.0806	C01530
Elaidic acid	C18:1n9t	0.0654	g/100g	0.0051	C01712
Oleic acid	C18:1n9c	7.87	g/100g	0.6083	C00712
Linoleic acid	C18:2n6c	4.40	g/100g	0.3426	C01595
Arachidic acid	C20:0	0.119	g/100g	0.0083	C06425
γ-Linolenic acid	C18:3n6	0.0265	g/100g	0.0021	C06426
cis-11-Eicosenoic acid	C20:1	0.686	g/100g	0.0482	C16526
α-Linolenic acid	C18:3n3	0.502	g/100g	0.0394	C06427
HeneiCosanoic acid	C21:0	0.0512	g/100g	0.0034	M00004
all cis-11,14 -Eicosadienoic acid	C20:2	0.223	g/100g	0.0158	C16525
Behenic acid	C22:0	0.0581	g/100g	0.0037	C08281
Dihomo-γ-linolenoic acid	C20:3n6	0.0421	g/100g	0.003	C03242
Erucic acid	C22:1n9	0.0818	g/100g	0.0053	C08316
all cis-11,14,17- Eicosatrienoic acid	C20:3n3	0.107	g/100g	0.0076	C16522
Arachidonic acid	C20:4n6	0.412	g/100g	0.0295	C00219
Tricosanoic acid	C23:0	0.0376	g/100g	0.0023	M00005
all cis-13,16- Docosadienoic acid	C22:2n6	0.0177	g/100g	0.0011	C16533
Lignoceric acid	C24:0	0.0523	g/100g	0.0031	C08320
all cis-5,8,11,14,17-Eicosapentaenoic acid	C20:5n3	1.36	g/100g	0.0982	C06428
Nervonic acid（Selacholeic)	C24:1n9	0.107	g/100g	0.0064	C08323
all cis-4,7,10,13,16,19-Docosahexaenoic acid	C22:6n3	3.37	g/100g	0.224	C06429
trace elelments	amount	unit	cofficient	compound ID
P	174	mg/100g	0.1227	C06262
Ca2+	1.56	g/kg	0.085	C00076
Cu2+	10.5	mg/kg	0.0004	C00070
Fe3+	74.3	mg/kg	0.0029	C14819
K+	1.46	g/kg	0.0815	C00238
Mg2+	307	mg/kg	0.0276	C00305
Mn2+	2.02	mg/kg	0.0001	C00034
Na+	2.26	g/kg	0.2146	C01330
Zn2+	16.9	mg/kg	0.0006	C00038
Se	0.41	mg/kg	1e-05	C01529
nucleotide	amount	unit	cofficient	compound ID
CMP	0.33	mg/100g	2e-05	C00055
UMP	0.96	mg/100g	6e-05	C00105
IMP	2.02	mg/100g	0.00013	C00130
GMP	0.5	mg/100g	3e-05	C00144
AMP	0.5	mg/100g	3e-05	C00020
