# Supplementary material for: Reconstruction of Eriocheir sinensis Y-organ Genome-Scale Metabolic Network and Differential Analysis After Eyestalk Ablation
Source: Front Genet. 2020 Sep 25;11:532492. doi: 10.3389/fgene.2020.532492 (PMC7545369; doi:10.3389/fgene.2020.532492)
Supplement: Supplementary File 2 — GSMN of Y-organ. “reactions” worksheet includes information of reactions, and “metabolites” worksheet includes information of metabolites in the network. [file Table_2.XLS]

## Sheet: reactions
reaction	reaction name	EQUATION	pathway	subsystem	enzyme	unigene	Reversibility	Lower bound	Upper bound	Objective	confidence score
R00010	alpha,alpha-trehalose glucohydrolase	[c] : C01083 + C00001 <==> 2 C00267	Starch and sucrose metabolism	Carbohydrate Metabolism	3.2.1.28	( Unigene20596_A0A and Unigene28294_A0A )	N	0	1000	0	2
R00014	pyruvate:thiamin diphosphate acetaldehydetransferase (decarboxylating)	[c] : C00022 + C00068 <==> C05125 + C00011	Glycolysis / Gluconeogenesis	Carbohydrate Metabolism	1.2.4.1;2.2.1.6;4.1.1.1	( Unigene8216_A0A and Unigene56010_A0A and Unigene49156_A0A and Unigene40892_A0A ) or ( Unigene40891_A0A )	N	0	1000	0	2
R00028	maltose glucohydrolase	[c] : C00208 + C00001 <==> 2 C00267	Starch and sucrose metabolism	Carbohydrate Metabolism	3.2.1.20	( Unigene9371_A0A and Unigene16266_A0A and Unigene7366_A0A and Unigene40494_A0A and Unigene14018_A0A and Unigene29636_A0A ) or ( Unigene50561_A0A and Unigene42872_A0A and Unigene50408_A0A and Unigene47450_A0A and Unigene15323_A0A and Unigene23697_A0A and Unigene23976_A0A )	N	0	1000	0	2
R00032	beta-Carotene:oxygen 15,15'-oxidoreductase (bond-cleaving)	[c] : C02094 + C00007 <==> 2 C00376	Retinol metabolism	Metabolism of Cofactors and Vitamins	1.14.99.36	( Unigene34524_A0A and Unigene57049_A0A and Unigene37098_A0A and Unigene53784_A0A and Unigene16338_A0A )	N	0	1000	0	2
R00036	5-aminolevulinate hydro-lyase (adding 5-aminolevulinate and cyclizing; porphobilinogen-forming)	[c] : 2 C00430 <==> C00931 + 2 C00001	Porphyrin and chlorophyll metabolism	Metabolism of Cofactors and Vitamins	4.2.1.24	( Unigene12682_A0A and Unigene14752_A0A )	N	0	1000	0	2
R00042	4-hydroxyphenylpyruvate:oxygen oxidoreductase (decarboxylating)	[c] : 2 C01179 + C00007 <==> 2 C00642 + 2 C00011	Tyrosine metabolism	Amino Acid Metabolism	1.2.3.13		N	0	1000	0	1
R00073	reduced acceptor:prostaglandin G2 oxidoreductase	[c] : C05956 + C00030 <==> C00427 + C00028 + C00001	Arachidonic acid metabolism	Lipid Metabolism	1.14.99.1	( Unigene48198_A0A and Unigene47903_A0A )	N	0	1000	0	2
R00078	Fe(II):oxygen oxidoreductase;Fe2+:oxygen oxidoreductase	[c] : C00007 + 4 C14818 + 4 C00080 <==> 4 C14819 + 2 C00001	Porphyrin and chlorophyll metabolism	Metabolism of Cofactors and Vitamins	1.16.3.1	( Unigene20267_A0A and Unigene19708_A0A )	N	0	1000	0	2
R00084	porphobilinogen:(4-[2-carboxyethyl]-3-[carboxymethyl]pyrrol-2-yl)methyltransferase (hydrolysing);porphobilinogen ammonia-lyase (polymerizing)	[c] : 4 C00931 + C00001 <==> C01024 + 4 C00014	Porphyrin and chlorophyll metabolism	Metabolism of Cofactors and Vitamins	2.5.1.61		N	0	1000	0	1
R00086	ATP phosphohydrolase	[c] : C00002 + C00001 <==> C00008 + C00009	Purine metabolism	Nucleotide Metabolism	3.6.1.3;3.6.1.5;3.6.1.8;3.6.1.15;3.6.3.1;3.6.3.2;3.6.3.3;3.6.3.4;3.6.3.5;3.6.3.6;3.6.3.7;3.6.3.8;3.6.3.9;3.6.3.10;3.6.3.11;3.6.3.12;3.6.3.14;3.6.3.15;3.6.3.16;3.6.3.17;3.6.3.18;3.6.3.19;3.6.3.20;3.6.3.21;3.6.3.22;3.6.3.23;3.6.3.24;3.6.3.25;3.6.3.26;3.6.3.27;3.6.3.28;3.6.3.29;3.6.3.30;3.6.3.31;3.6.3.32;3.6.3.33;3.6.3.34;3.6.3.35;3.6.3.36;3.6.3.37;3.6.3.38;3.6.3.39;3.6.3.40;3.6.3.41;3.6.3.42;3.6.3.…	( ( Unigene33812_A0A ) or ( Unigene35104_A0A ) or ( Unigene30508_A0A ) )	N	0	1000	0	2
R00089	ATP diphosphate-lyase (cyclizing; 3',5'-cyclic-AMP-forming)	[c] : C00002 <==> C00575 + C00013	Purine metabolism	Nucleotide Metabolism	4.6.1.1	( Unigene34001_A0A and Unigene9409_A0A and Unigene42066_A0A and Unigene28223_A0A and Unigene1787_A0A and Unigene13236_A0A and Unigene55197_A0A and Unigene21280_A0A and Unigene40956_A0A and Unigene30053_A0A ) or ( Unigene52821_A0A and Unigene42595_A0A and Unigene12250_A0A and Unigene27853_A0A )	N	0	1000	0	2
R00093	L-glutamate:NAD+ oxidoreductase (transaminating)	[c] : C00064 + C00026 + C00004 + C00080 <==> 2 C00025 + C00003	Alanine, aspartate and glutamate metabolism	Amino Acid Metabolism	1.4.1.14	( Unigene40236_A0A and Unigene25226_A0A and Unigene30627_A0A and Unigene2285_A0A and Unigene7521_A0A and Unigene29101_A0A )	N	0	1000	0	2
R00100	NADH:ferricytochrome-b5 oxidoreductase	[c] : C00004 + 2 C00996 <==> C00003 + 2 C00999 + C00080	Amino sugar and nucleotide sugar metabolism	Carbohydrate Metabolism	1.6.2.2	( Unigene46401_A0A and Unigene55820_A0A and Unigene4818_A0A and Unigene44400_A0A and Unigene28802_A0A )	N	0	1000	0	2
R00103	NAD+ phosphohydrolase	[c] : C00003 + C00001 <==> C00020 + C00455	Nicotinate and nicotinamide metabolism	Metabolism of Cofactors and Vitamins	3.6.1.9;3.6.1.22	( Unigene15522_A0A and Unigene6586_A0A and Unigene35482_A0A and Unigene22325_A0A and Unigene13055_A0A and Unigene16733_A0A and Unigene24143_A0A and Unigene47033_A0A )	N	0	1000	0	2
R00104	ATP:NAD+ 2'-phosphotransferase	[c] : C00002 + C00003 <==> C00008 + C00006	Nicotinate and nicotinamide metabolism	Metabolism of Cofactors and Vitamins	2.7.1.23	( Unigene16791_A0A ) or ( Unigene6658_A0A )	N	0	1000	0	2
R00111	N-(omega)-Hydroxyarginine,NADPH:oxygen oxidoreductase (nitric-oxide-forming)	[c] : C00005 + 2 C05933 + 2 C00007 + C00080 <==> C00006 + 2 C00533 + 2 C00327 + 2 C00001	Arginine and proline metabolism	Amino Acid Metabolism	1.14.13.39		N	0	1000	0	2
R00112	NADPH:NAD+ oxidoreductase	[c] : C00005 + C00003 <==> C00006 + C00004	Nicotinate and nicotinamide metabolism	Metabolism of Cofactors and Vitamins	1.6.1.1;1.6.1.2	( Unigene45141_A0A and Unigene8246_A0A and Unigene49286_A0A )	Y	-1000	1000	0	2
R00114	L-Glutamate:NADP+ oxidoreductase (transaminating)	[c] : C00064 + C00026 + C00005 + C00080 <==> 2 C00025 + C00006	Alanine, aspartate and glutamate metabolism	Amino Acid Metabolism	1.4.1.13	( Unigene40236_A0A and Unigene25226_A0A and Unigene30627_A0A and Unigene2285_A0A and Unigene7521_A0A and Unigene29101_A0A )	N	0	1000	0	2
R00115	glutathione:NADP+ oxidoreductase	[c] : C00127 + C00005 + C00080 <==> 2 C00051 + C00006	Glutathione metabolism	Metabolism of Other Amino Acids	1.8.1.7		N	0	1000	0	1
R00122	ADP phosphohydrolase	[c] : C00008 + C00001 <==> C00020 + C00009	Purine metabolism	Nucleotide Metabolism	3.6.1.5	Unigene33812_A0A	N	0	1000	0	2
R00124	ATP:ADP phosphatransferase	[c] : C00008 + C00002 <==> C00002 + C00008	Purine metabolism	Nucleotide Metabolism	2.7.4.6	( Unigene21044_A0A and Unigene16902_A0A and Unigene26862_A0A and Unigene43803_A0A and Unigene36433_A0A )	Y	-1000	1000	0	2
R00127	ATP:AMP phosphotransferase	[c] : C00002 + C00020 <==> 2 C00008	Purine metabolism	Nucleotide Metabolism	2.7.4.3	( Unigene8600_A0A and Unigene2847_A0A and Unigene34073_A0A )	Y	-1000	1000	0	2
R00130	ATP:dephospho-CoA 3'-phosphotransferase	[c] : C00002 + C00882 <==> C00008 + C00010	Pantothenate and CoA biosynthesis	Metabolism of Cofactors and Vitamins	2.7.1.24	Unigene23758_A0A	N	0	1000	0	2
R00132	carbonate hydro-lyase (carbon-dioxide-forming);carbonic acid hydro-lyase	[c] : C00011 + C00001 <==> C01353	Nitrogen metabolism	Energy Metabolism	4.2.1.1	( Unigene41002_A0A and Unigene32023_A0A and Unigene9253_A0A )	Y	-1000	1000	0	2
R00134	formate:NADP+ oxidoreductase	[c] : C00011 + C00005 <==> C00058 + C00006	Methane metabolism	Energy Metabolism	1.2.1.43		N	0	1000	0	1
R00135	formation of L-Proline	[c] : C00148 + C00012 <==> C00012 + C00001	Arginine and proline metabolism	Amino Acid Metabolism	3.4.11.5	( Unigene3366_A0A and Unigene1296_A0A and Unigene15866_A0A )	N	0	1000	0	2
R00137	ATP:nicotinamide-nucleotide adenylyltransferase	[c] : C00002 + C00455 <==> C00013 + C00003	Nicotinate and nicotinamide metabolism	Metabolism of Cofactors and Vitamins	2.7.7.1;2.7.7.18	( Unigene2026_A0A ) or ( Unigene46205_A0A )	Y	-1000	1000	0	2
R00155	UDP phosphohydrolase	[c] : C00015 + C00001 <==> C00105 + C00009	Pyrimidine metabolism	Nucleotide Metabolism	3.6.1.5;3.6.1.6	( ( Unigene4191_A0A and Unigene23117_A0A and Unigene23144_A0A ) or ( Unigene33812_A0A ) )	N	0	1000	0	2
R00156	ATP:UDP phosphotransferase	[c] : C00002 + C00015 <==> C00008 + C00075	Pyrimidine metabolism	Nucleotide Metabolism	2.7.4.6	( Unigene21044_A0A and Unigene16902_A0A and Unigene26862_A0A and Unigene43803_A0A and Unigene36433_A0A )	Y	-1000	1000	0	2
R00157	Uridine triphosphate:AMP phosphotransferase;UTP:AMP phosphotransferase	[c] : C00015 + C00008 <==> C00075 + C00020	Pyrimidine metabolism	Nucleotide Metabolism	2.7.4.10	Unigene34073_A0A	N	0	1000	0	2
R00158	ATP:UMP phosphotransferase	[c] : C00002 + C00105 <==> C00008 + C00015	Pyrimidine metabolism	Nucleotide Metabolism	2.7.4.4;2.7.4.14;2.7.4.22	Unigene7801_A0A	Y	-1000	1000	0	2
R00159	UTP phosphohydrolase	[c] : C00075 + C00001 <==> C00015 + C00009	Pyrimidine metabolism	Nucleotide Metabolism	3.6.1.5;3.6.1.39	Unigene33812_A0A	N	0	1000	0	2
R00160	FAD nucleotidohydrolase	[c] : C00016 + C00001 <==> C00020 + C00061	Riboflavin metabolism	Metabolism of Cofactors and Vitamins	3.6.1.9;3.6.1.18	( Unigene15522_A0A and Unigene6586_A0A and Unigene35482_A0A and Unigene22325_A0A and Unigene13055_A0A and Unigene16733_A0A and Unigene24143_A0A and Unigene47033_A0A )	N	0	1000	0	2
R00173	pyridoxal-5'-phosphate phosphohydrolase	[c] : C00018 + C00001 <==> C00250 + C00009	Vitamin B6 metabolism	Metabolism of Cofactors and Vitamins	3.1.3.74	Unigene34035_A0A	N	0	1000	0	2
R00177	ATP:L-methionine S-adenosyltransferase	[c] : C00002 + C00073 + C00001 <==> C00009 + C00013 + C00019	Cysteine and methionine metabolism	Amino Acid Metabolism	2.5.1.6	( Unigene21068_A0A and Unigene35036_A0A and Unigene18124_A0A )	N	0	1000	0	2
R00178	S-adenosyl-L-methionine carboxy-lyase [(5-deoxy-5-adenosyl)(3-aminopropyl)methylsulfonium-forming]	[c] : C00019 + C00080 <==> C01137 + C00011	Cysteine and methionine metabolism	Amino Acid Metabolism	4.1.1.50	( Unigene7965_A0A and Unigene45016_A0A )	N	0	1000	0	2
R00181	AMP aminohydrolase	[c] : C00020 + C00001 <==> C00130 + C00014	Purine metabolism	Nucleotide Metabolism	3.5.4.6;3.5.4.17	Unigene7978_A0A	N	0	1000	0	2
R00183	Adenosine 5'-monophosphate phosphohydrolase	[c] : C00020 + C00001 <==> C00212 + C00009	Purine metabolism	Nucleotide Metabolism	3.1.3.5	( Unigene49556_A0A and Unigene39746_A0A and Unigene11171_A0A and Unigene50486_A0A and Unigene24749_A0A and Unigene6641_A0A and Unigene38108_A0A and Unigene22160_A0A and Unigene43269_A0A )	N	0	1000	0	2
R00184	P1,P4-bis(5'-adenosyl)-tetraphosphate adenylohydrolase	[c] : C01260 + C00001 <==> C00002 + C00020	Purine metabolism	Nucleotide Metabolism	3.6.1.17	Unigene27515_A0A	N	0	1000	0	2
R00185	ATP:adenosine 5'-phosphotransferase	[c] : C00002 + C00212 <==> C00008 + C00020	Purine metabolism	Nucleotide Metabolism	2.7.1.20;2.7.1.74	( Unigene13501_A0A and Unigene16563_A0A )	Y	-1000	1000	0	2
R00187	P1,P3-bis(5'-adenosyl)-triphosphate adenylohydrolase	[c] : C06197 + C00001 <==> C00008 + C00020	Purine metabolism	Nucleotide Metabolism	3.6.1.29	( Unigene48412_A0A and Unigene16334_A0A )	N	0	1000	0	2
R00190	AMP:diphosphate phospho-D-ribosyltransferase	[c] : C00020 + C00013 <==> C00147 + C00119	Purine metabolism	Nucleotide Metabolism	2.4.2.7;2.4.2.8	( ( Unigene34623_A0A ) or ( Unigene5009_A0A ) )	Y	-1000	1000	0	2
R00191	adenosine 3',5'-phosphate 5'-nucleotidohydrolase	[c] : C00575 + C00001 <==> C00020	Purine metabolism	Nucleotide Metabolism	3.1.4.17;3.1.4.53	( Unigene48860_A0A and Unigene21113_A0A and Unigene2629_A0A and Unigene39476_A0A and Unigene28301_A0A and Unigene56066_A0A and Unigene14457_A0A and Unigene28484_A0A and Unigene14877_A0A and Unigene11272_A0A and Unigene55805_A0A and Unigene41040_A0A and Unigene56177_A0A and Unigene10608_A0A and Unigene29583_A0A and Unigene19545_A0A and Unigene15456_A0A and Unigene10280_A0A and Unigene44223_A0A and…	N	0	1000	0	2
R00192	S-Adenosyl-L-homocysteine hydrolase	[c] : C00021 + C00001 <==> C00212 + C00155	Cysteine and methionine metabolism	Amino Acid Metabolism	3.3.1.1	Unigene19329_A0A	N	0	1000	0	2
R00197	(R)-Lactate:ferricytochrome-c 2-oxidoreductase	[c] : C00256 + 2 C00125 <==> C00022 + 2 C00126 + 2 C00080	Pyruvate metabolism	Carbohydrate Metabolism	1.1.2.4	Unigene1847_A0A	N	0	1000	0	2
R00199	ATP:pyruvate,water phosphotransferase	[c] : C00002 + C00022 + C00001 <==> C00020 + C00074 + C00009	Pyruvate metabolism	Carbohydrate Metabolism	2.7.9.2	( Unigene37774_A0A and Unigene18953_A0A )	N	0	1000	0	2
R00200	ATP:pyruvate 2-O-phosphotransferase	[c] : C00008 + C00074 <==> C00002 + C00022	Glycolysis / Gluconeogenesis	Carbohydrate Metabolism	2.7.1.40	( Unigene19080_A0A and Unigene19081_A0A )	N	0	1000	0	2
R00212	Acetyl-CoA:formate C-acetyltransferase	[c] : C00024 + C00058 <==> C00010 + C00022	Pyruvate metabolism	Carbohydrate Metabolism	2.3.1.54		Y	-1000	1000	0	1
R00216	(S)-Malate:NADP+ oxidoreductase(oxaloacetate-decarboxylating)	[c] : C00149 + C00006 <==> C00022 + C00011 + C00005 + C00080	Pyruvate metabolism	Carbohydrate Metabolism	1.1.1.40	Unigene20206_A0A	Y	-1000	1000	0	2
R00220	L-serine ammonia-lyase	[c] : C00065 <==> C00022 + C00014	Glycine, serine and threonine metabolism	Amino Acid Metabolism	4.3.1.17;4.3.1.19	( Unigene25892_A0A and Unigene53519_A0A and Unigene27999_A0A )	Y	-1000	1000	0	2
R00233	malonyl-CoA carboxy-lyase (acetyl-CoA-forming)	[c] : C00083 <==> C00024 + C00011	beta-Alanine metabolism	Metabolism of Other Amino Acids	4.1.1.9	( Unigene43592_A0A and Unigene14827_A0A and Unigene51954_A0A )	N	0	1000	0	2
R00235	Acetate:CoA ligase (AMP-forming)	[c] : C00002 + C00033 + C00010 <==> C00020 + C00013 + C00024	Glycolysis / Gluconeogenesis	Carbohydrate Metabolism	6.2.1.1	Unigene45351_A0A	N	0	1000	0	2
R00236	acetyl adenylate:CoA acetyltransferase	[c] : C05993 + C00010 <==> C00020 + C00024	Pyruvate metabolism	Carbohydrate Metabolism	6.2.1.1	Unigene45351_A0A	Y	-1000	1000	0	2
R00238	Acetyl-CoA:acetyl-CoA C-acetyltransferase	[c] : 2 C00024 <==> C00010 + C00332	Fatty acid metabolism	Lipid Metabolism	2.3.1.9	( Unigene30807_A0A and Unigene30868_A0A )	Y	-1000	1000	0	2
R00245	L-Glutamate 5-semialdehyde:NAD+ oxidoreductase	[c] : C01165 + C00003 + C00001 <==> C00025 + C00004 + C00080	Arginine and proline metabolism	Amino Acid Metabolism	1.5.1.12	( Unigene22989_A0A and Unigene26663_A0A )	Y	-1000	1000	0	2
R00251	5-oxo-L-proline amidohydrolase (ATP-hydrolysing)	[c] : C00002 + C01879 + 2 C00001 <==> C00008 + C00009 + C00025	Glutathione metabolism	Metabolism of Other Amino Acids	3.5.2.9	( Unigene40847_A0A and Unigene53032_A0A and Unigene30769_A0A and Unigene34317_A0A and Unigene561_A0A and Unigene30457_A0A and Unigene32810_A0A and Unigene5482_A0A )	N	0	1000	0	2
R00253	L-Glutamate:ammonia ligase (ADP-forming)	[c] : C00002 + C00025 + C00014 <==> C00008 + C00009 + C00064	Alanine, aspartate and glutamate metabolism	Amino Acid Metabolism	6.3.1.2	( Unigene20688_A0A and Unigene9110_A0A and Unigene2856_A0A and Unigene49545_A0A )	N	0	1000	0	2
R00257	Deamido-NAD+:L-glutamine amido-ligase (AMP-forming)	[c] : C00002 + C00857 + C00064 + C00001 <==> C00020 + C00013 + C00003 + C00025	Nicotinate and nicotinamide metabolism	Metabolism of Cofactors and Vitamins	6.3.5.1	Unigene2035_A0A	N	0	1000	0	2
R00258	L-Alanine:2-oxoglutarate aminotransferase	[c] : C00041 + C00026 <==> C00022 + C00025	Alanine, aspartate and glutamate metabolism	Amino Acid Metabolism	2.6.1.2	( Unigene55882_A0A and Unigene34360_A0A and Unigene11177_A0A and Unigene52167_A0A and Unigene45328_A0A )	Y	-1000	1000	0	2
R00261	L-glutamate 1-carboxy-lyase (4-aminobutanoate-forming)	[c] : C00025 <==> C00334 + C00011	Alanine, aspartate and glutamate metabolism	Amino Acid Metabolism	4.1.1.15		N	0	1000	0	2
R00264	2,5-dioxopentanoate:NADP+ 5-oxidoreductase	[c] : C00433 + C00006 + C00001 <==> C00026 + C00005 + C00080	Pentose and glucuronate interconversions	Carbohydrate Metabolism	1.2.1.3;1.2.1.26	( Unigene45813_A0A and Unigene25877_A0A and Unigene25916_A0A and Unigene48344_A0A and Unigene2472_A0A and Unigene27550_A0A and Unigene12647_A0A and Unigene30385_A0A and Unigene56244_A0A and Unigene1690_A0A and Unigene13946_A0A and Unigene33389_A0A and Unigene22602_A0A ) or ( Unigene48345_A0A )	N	0	1000	0	2
R00267	Isocitrate:NADP+ oxidoreductase (decarboxylating)	[c] : C00311 + C00006 <==> C00026 + C00011 + C00005 + C00080	Glutathione metabolism	Metabolism of Other Amino Acids	1.1.1.42	( Unigene20751_A0A and Unigene20752_A0A and Unigene20754_A0A and CL1622.Contig1_A0A )	N	0	1000	0	2
R00268	oxalosuccinate carboxy-lyase (2-oxoglutarate-forming)	[c] : C05379 <==> C00026 + C00011	Citrate cycle (TCA cycle)	Carbohydrate Metabolism	1.1.1.42	( Unigene20751_A0A and Unigene20752_A0A and Unigene20754_A0A and CL1622.Contig1_A0A )	Y	-1000	1000	0	2
R00269	2-oxoglutaramate amidohydrolase	[c] : C00940 + C00001 <==> C00026 + C00014	Alanine, aspartate and glutamate metabolism	Amino Acid Metabolism	3.5.1.3	Unigene30259_A0A	N	0	1000	0	2
R00274	glutathione:hydrogen-peroxide oxidoreductase	[c] : C00027 + 2 C00051 <==> C00127 + 2 C00001	Glutathione metabolism	Metabolism of Other Amino Acids	1.11.1.9	( Unigene19592_A0A and Unigene13898_A0A and Unigene2035_A0A and CL86.Contig2_A0A and CL86.Contig1_A0A )	N	0	1000	0	2
R00277	Pyridoxamine-5'-phosphate:oxygen oxidoreductase (deaminating)	[c] : C00647 + C00001 + C00007 <==> C00018 + C00014 + C00027	Vitamin B6 metabolism	Metabolism of Cofactors and Vitamins	1.4.3.5	Unigene44353_A0A	N	0	1000	0	2
R00278	Pyridoxine 5-phosphate:oxygen oxidoreductase	[c] : C00627 + C00007 <==> C00027 + C00018	Vitamin B6 metabolism	Metabolism of Cofactors and Vitamins	1.4.3.5	Unigene44353_A0A	N	0	1000	0	2
R00286	UDP-glucose:NAD+ 6-oxidoreductase	[c] : C00029 + C00001 + 2 C00003 <==> C00167 + 2 C00004 + 2 C00080	Pentose and glucuronate interconversions	Carbohydrate Metabolism	1.1.1.22	( Unigene4322_A0A and Unigene2450_A0A )	Y	-1000	1000	0	2
R00287	UDP-glucose glucophosphohydrolase	[c] : C00029 + C00001 <==> C00105 + C00103	Starch and sucrose metabolism	Carbohydrate Metabolism	3.6.1.8;3.6.1.9;3.6.1.45	( Unigene15522_A0A and Unigene6586_A0A and Unigene35482_A0A and Unigene22325_A0A and Unigene13055_A0A and Unigene16733_A0A and Unigene24143_A0A and Unigene47033_A0A )	N	0	1000	0	2
R00289	UTP:alpha-D-glucose-1-phosphate uridylyltransferase	[c] : C00075 + C00103 <==> C00013 + C00029	Pentose and glucuronate interconversions	Carbohydrate Metabolism	2.7.7.9	( Unigene8326_A0A ) or ( Unigene37913_A0A )	N	0	1000	0	2
R00291	UDP-glucose 4-epimerase	[c] : C00029 <==> C00052	Galactose metabolism	Carbohydrate Metabolism	5.1.3.2	Unigene46238_A0A	Y	-1000	1000	0	2
R00292	UDP-glucose:glycogen 4-alpha-D-glucosyltransferase	[c] : C00029 + C00718 <==> C00015 + C00718	Starch and sucrose metabolism	Carbohydrate Metabolism	2.4.1.11	( Unigene45833_A0A and Unigene13799_A0A )	N	0	1000	0	2
R00299	ATP:D-glucose 6-phosphotransferase	[c] : C00002 + C00267 <==> C00008 + C00092	Streptomycin biosynthesis	Biosynthesis of Other Secondary Metabolites	2.7.1.1;2.7.1.2	( Unigene55974_A0A and Unigene47170_A0A and Unigene33700_A0A and Unigene9255_A0A )	N	0	1000	0	2
R00310	protoheme ferro-lyase (protoporphyrin-forming)	[c] : C02191 + C14818 <==> C00032 + 2 C00080	Porphyrin and chlorophyll metabolism	Metabolism of Cofactors and Vitamins	4.99.1.1	Unigene32080_A0A	N	0	1000	0	2
R00316	ATP:acetate adenylyltransferase	[c] : C00002 + C00033 <==> C00013 + C05993	Pyruvate metabolism	Carbohydrate Metabolism	6.2.1.1	Unigene45351_A0A	Y	-1000	1000	0	2
R00317	Acetyl phosphate phosphohydrolase	[c] : C00227 + C00001 <==> C00033 + C00009	Pyruvate metabolism	Carbohydrate Metabolism	3.6.1.7	Unigene43391_A0A	N	0	1000	0	2
R00328	GDP phosphohydrolase	[c] : C00035 + C00001 <==> C00144 + C00009	Purine metabolism	Nucleotide Metabolism	3.6.1.5;3.6.1.6;3.6.1.42	( ( Unigene4191_A0A and Unigene23117_A0A and Unigene23144_A0A ) or ( Unigene33812_A0A ) )	N	0	1000	0	2
R00330	ATP:GDP phosphotransferase	[c] : C00002 + C00035 <==> C00008 + C00044	Purine metabolism	Nucleotide Metabolism	2.7.4.6	( Unigene21044_A0A and Unigene16902_A0A and Unigene26862_A0A and Unigene43803_A0A and Unigene36433_A0A )	Y	-1000	1000	0	2
R00332	ATP:GMP phosphotransferase	[c] : C00002 + C00144 <==> C00008 + C00035	Purine metabolism	Nucleotide Metabolism	2.7.4.8	( Unigene48248_A0A and Unigene45938_A0A and Unigene31671_A0A and Unigene39921_A0A and Unigene19611_A0A and Unigene52014_A0A )	Y	-1000	1000	0	2
R00335	GTP phosphohydrolase	[c] : C00044 + C00001 <==> C00035 + C00009	Purine metabolism	Nucleotide Metabolism	3.6.1.5;3.6.5.1;3.6.5.2;3.6.5.3;3.6.5.4;3.6.5.5;3.6.5.6	Unigene33812_A0A	N	0	1000	0	2
R00342	(S)-malate:NAD+ oxidoreductase	[c] : C00149 + C00003 <==> C00036 + C00004 + C00080	Citrate cycle (TCA cycle)	Carbohydrate Metabolism	1.1.1.37	( Unigene9562_A0A and Unigene20456_A0A )	Y	-1000	1000	0	2
R00344	Pyruvate:carbon-dioxide ligase (ADP-forming)	[c] : C00002 + C00022 + C00288 <==> C00008 + C00009 + C00036	Citrate cycle (TCA cycle)	Carbohydrate Metabolism	6.4.1.1	( Unigene18753_A0A and Unigene9385_A0A and Unigene50478_A0A ) or ( Unigene50477_A0A )	N	0	1000	0	2
R00348	2-oxosuccinamate amidohydrolase	[c] : C02362 + C00001 <==> C00036 + C00014	Alanine, aspartate and glutamate metabolism	Amino Acid Metabolism	3.5.1.3	Unigene30259_A0A	N	0	1000	0	2
R00351	acetyl-CoA:oxaloacetate C-acetyltransferase (thioester-hydrolysing)	[c] : C00024 + C00001 + C00036 <==> C00158 + C00010	Citrate cycle (TCA cycle)	Carbohydrate Metabolism	2.3.3.1;2.3.3.3	( Unigene8239_A0A and Unigene28579_A0A )	Y	-1000	1000	0	2
R00352	acetyl-CoA:oxaloacetate C-acetyltransferase [(pro-S)-carboxymethyl-forming, ADP-phosphorylating]	[c] : C00008 + C00009 + C00024 + C00036 <==> C00002 + C00158 + C00010	Citrate cycle (TCA cycle)	Carbohydrate Metabolism	2.3.3.8	( Unigene8700_A0A and Unigene9108_A0A )	Y	-1000	1000	0	2
R00355	L-Aspartate:2-oxoglutarate aminotransferase	[c] : C00049 + C00026 <==> C00036 + C00025	Alanine, aspartate and glutamate metabolism	Amino Acid Metabolism	2.6.1.1	( Unigene48841_A0A and Unigene8075_A0A and Unigene41064_A0A )	Y	-1000	1000	0	2
R00359	D-Aspartate:oxygen oxidoreductase (deaminating)	[c] : C00402 + C00001 + C00007 <==> C00036 + C00014 + C00027	Alanine, aspartate and glutamate metabolism	Amino Acid Metabolism	1.4.3.1;1.4.3.15	( Unigene40439_A0A and Unigene34551_A0A )	N	0	1000	0	2
R00366	glycine:oxygen oxidoreductase (deaminating);Aminoacetic acid:oxygen oxidoreductase (deaminating)	[c] : C00037 + C00001 + C00007 <==> C00048 + C00014 + C00027	Glycine, serine and threonine metabolism	Amino Acid Metabolism	1.4.3.3;1.4.3.19	( Unigene6815_A0A and Unigene10145_A0A and Unigene22101_A0A )	N	0	1000	0	2
R00367	S-Adenosyl-L-methionine:glycine N-methyltransferase	[c] : C00019 + C00037 <==> C00021 + C00213	Glycine, serine and threonine metabolism	Amino Acid Metabolism	2.1.1.20;2.1.1.156;2.1.1.162	( Unigene1598_A0A and Unigene50710_A0A )	Y	-1000	1000	0	2
R00369	L-Alanine:glyoxylate aminotransferase	[c] : C00041 + C00048 <==> C00022 + C00037	Alanine, aspartate and glutamate metabolism	Amino Acid Metabolism	2.6.1.44	( Unigene10634_A0A and Unigene32735_A0A )	N	0	1000	0	2
R00371	Acetyl-CoA:glycine C-acetyltransferase	[c] : C00024 + C00037 <==> C00010 + C03508	Glycine, serine and threonine metabolism	Amino Acid Metabolism	2.3.1.29	( Unigene27485_A0A and Unigene33445_A0A )	Y	-1000	1000	0	2
R00372	Glycine:2-oxoglutarate aminotransferase	[c] : C00037 + C00026 <==> C00048 + C00025	Glycine, serine and threonine metabolism	Amino Acid Metabolism	2.6.1.4;2.6.1.44	( Unigene10634_A0A and Unigene32735_A0A )	Y	-1000	1000	0	2
R00375	Deoxyadenosine 5'-triphosphate:DNA deoxynucleotidyltransferase (DNA-directed)	[c] : C00131 + C00039 <==> C00013 + C00039	Purine metabolism	Nucleotide Metabolism	2.7.7.7	Unigene20042_A0A	Y	-1000	1000	0	2
R00376	Deoxyguanosine 5'-triphosphate:DNA deoxynucleotidyltransferase (DNA-directed)	[c] : C00286 + C00039 <==> C00013 + C00039	Purine metabolism	Nucleotide Metabolism	2.7.7.7	Unigene20042_A0A	Y	-1000	1000	0	2
R00377	Deoxycytidine triphosphate:DNA deoxynucleotidyltransferase (DNA-directed)	[c] : C00458 + C00039 <==> C00013 + C00039	Pyrimidine metabolism	Nucleotide Metabolism	2.7.7.7	Unigene20042_A0A	Y	-1000	1000	0	2
R00378	deoxythymidine triphosphate:DNA deoxynucleotidyltransferase (DNA-directed)	[c] : C00459 + C00039 <==> C00013 + C00039	Pyrimidine metabolism	Nucleotide Metabolism	2.7.7.7	Unigene20042_A0A	Y	-1000	1000	0	2
R00410	succinyl-CoA:acetoacetate CoA-transferase	[c] : C00091 + C00164 <==> C00042 + C00332	Synthesis and degradation of ketone bodies	Lipid Metabolism	2.8.3.5	( Unigene32150_A0A and Unigene42812_A0A and Unigene41960_A0A )	Y	-1000	1000	0	2
R00414	UDP-N-acetyl-D-glucosamine 2-epimerase	[c] : C00043 + C00001 <==> C00645 + C00015	Amino sugar and nucleotide sugar metabolism	Carbohydrate Metabolism	5.1.3.14		N	0	1000	0	1
R00416	UTP:N-acetyl-alpha-D-glucosamine-1-phosphate uridylyltransferase	[c] : C00075 + C04501 <==> C00013 + C00043	Amino sugar and nucleotide sugar metabolism	Carbohydrate Metabolism	2.7.7.23	Unigene50068_A0A	N	0	1000	0	2
R00428	GTP 8,9-hydrolase	[c] : C00044 + C00001 <==> C05922	Folate biosynthesis	Metabolism of Cofactors and Vitamins	3.5.4.16	Unigene7886_A0A	N	0	1000	0	2
R00429	ATP:GTP 3'-diphosphotransferase	[c] : C00002 + C00044 <==> C00020 + C04494	Purine metabolism	Nucleotide Metabolism	2.7.6.5		N	0	1000	0	1
R00430	GTP:pyruvate 2-O-phosphotransferase	[c] : C00044 + C00022 <==> C00035 + C00074	Purine metabolism	Nucleotide Metabolism	2.7.1.40	( Unigene19080_A0A and Unigene19081_A0A )	Y	-1000	1000	0	2
R00431	GTP:oxaloacetate carboxy-lyase (adding GTP;phosphoenolpyruvate-forming);GTP:oxaloacetate carboxy-lyase (transphosphorylating)	[c] : C00044 + C00036 <==> C00035 + C00074 + C00011	Glycolysis / Gluconeogenesis	Carbohydrate Metabolism	4.1.1.32	Unigene18735_A0A	N	0	1000	0	2
R00432	Succinate:CoA ligase (GDP-forming)	[c] : C00044 + C00042 + C00010 <==> C00035 + C00009 + C00091	Citrate cycle (TCA cycle)	Carbohydrate Metabolism	6.2.1.4	( Unigene44983_A0A and Unigene40794_A0A and Unigene17368_A0A and Unigene16730_A0A and Unigene18100_A0A and Unigene16621_A0A )	Y	-1000	1000	0	2
R00434	GTP diphosphate-lyase (cyclizing; 3',5'-cyclic-GMP-forming)	[c] : C00044 <==> C00942 + C00013	Purine metabolism	Nucleotide Metabolism	4.6.1.1;4.6.1.2	( ( Unigene34001_A0A and Unigene9409_A0A and Unigene42066_A0A and Unigene28223_A0A and Unigene1787_A0A and Unigene13236_A0A and Unigene55197_A0A and Unigene21280_A0A and Unigene40956_A0A and Unigene30053_A0A ) or ( Unigene15258_A0A and Unigene32431_A0A and Unigene31745_A0A and Unigene31705_A0A and Unigene18199_A0A and Unigene11727_A0A and Unigene31675_A0A ) or ( Unigene52821_A0A and Unigene42595_…	N	0	1000	0	2
R00435	ATP:polynucleotide adenylyltransferase;ATP:RNA adenylyltransferase	[c] : C00002 + C00046 <==> C00013 + C00046	Purine metabolism	Nucleotide Metabolism	2.7.7.6;2.7.7.19;2.7.7.48	( CL49.Contig1_A0A and CL14.Contig2_A0A and Unigene19971_A0A and CL46.Contig1_A0A and CL5.Contig2_A0A and Unigene20365_A0A and CL1642.Contig1_A0A and Unigene9160_A0A and Unigene18739_A0A and Unigene19018_A0A and Unigene53751_A0A and Unigene4768_A0A and CL2.Contig4_A0A and Unigene44966_A0A and Unigene54328_A0A and Unigene21093_A0A and Unigene33480_A0A and Unigene20196_A0A and Unigene29895_A0A and …	Y	-1000	1000	0	2
R00437	polyribonucleotide:phosphate adenylyltransferase	[c] : C00046 + C00008 <==> C00046 + C00009	Purine metabolism	Nucleotide Metabolism	2.7.7.8	( Unigene18493_A0A and Unigene31272_A0A )	Y	-1000	1000	0	2
R00438	polyribonucleotide:phosphate uridylyltransferase	[c] : C00046 + C00015 <==> C00046 + C00009	Pyrimidine metabolism	Nucleotide Metabolism	2.7.7.8	( Unigene18493_A0A and Unigene31272_A0A )	Y	-1000	1000	0	2
R00439	polyribonucleotide:phosphate guanylyltransferase	[c] : C00046 + C00035 <==> C00046 + C00009	Purine metabolism	Nucleotide Metabolism	2.7.7.8	( Unigene18493_A0A and Unigene31272_A0A )	Y	-1000	1000	0	2
R00440	polyribonucleotide:phosphate cytidylyltransferase	[c] : C00046 + C00112 <==> C00046 + C00009	Pyrimidine metabolism	Nucleotide Metabolism	2.7.7.8	( Unigene18493_A0A and Unigene31272_A0A )	Y	-1000	1000	0	2
R00441	GTP:RNA guanylyltransferase (DNA-directed);GTP:RNA guanylyltransferase (RNA-directed)	[c] : C00044 + C00046 <==> C00013 + C00046	Purine metabolism	Nucleotide Metabolism	2.7.7.6;2.7.7.48	( CL49.Contig1_A0A and CL14.Contig2_A0A and Unigene19971_A0A and CL46.Contig1_A0A and CL5.Contig2_A0A and Unigene20365_A0A and CL1642.Contig1_A0A and Unigene9160_A0A and Unigene18739_A0A and Unigene19018_A0A and Unigene53751_A0A and Unigene4768_A0A and CL2.Contig4_A0A and Unigene44966_A0A and Unigene54328_A0A and Unigene21093_A0A and Unigene33480_A0A and Unigene20196_A0A and Unigene29895_A0A and …	Y	-1000	1000	0	2
R00442	CTP:RNA cytidylyltransferase (DNA-directed);CTP:RNA cytidylyltransferase (RNA-directed)	[c] : C00063 + C00046 <==> C00013 + C00046	Pyrimidine metabolism	Nucleotide Metabolism	2.7.7.6;2.7.7.48	( CL49.Contig1_A0A and CL14.Contig2_A0A and Unigene19971_A0A and CL46.Contig1_A0A and CL5.Contig2_A0A and Unigene20365_A0A and CL1642.Contig1_A0A and Unigene9160_A0A and Unigene18739_A0A and Unigene19018_A0A and Unigene53751_A0A and Unigene4768_A0A and CL2.Contig4_A0A and Unigene44966_A0A and Unigene54328_A0A and Unigene21093_A0A and Unigene33480_A0A and Unigene20196_A0A and Unigene29895_A0A and …	Y	-1000	1000	0	2
R00443	UTP:RNA uridylyltransferase	[c] : C00075 + C00046 <==> C00013 + C00046	Pyrimidine metabolism	Nucleotide Metabolism	2.7.7.6;2.7.7.48;2.7.7.52	( CL49.Contig1_A0A and CL14.Contig2_A0A and Unigene19971_A0A and CL46.Contig1_A0A and CL5.Contig2_A0A and Unigene20365_A0A and CL1642.Contig1_A0A and Unigene9160_A0A and Unigene18739_A0A and Unigene19018_A0A and Unigene53751_A0A and Unigene4768_A0A and CL2.Contig4_A0A and Unigene44966_A0A and Unigene54328_A0A and Unigene21093_A0A and Unigene33480_A0A and Unigene20196_A0A and Unigene29895_A0A and …	Y	-1000	1000	0	2
R00462	L-lysine carboxy-lyase (cadaverine-forming)	[c] : C00047 <==> C01672 + C00011	Lysine degradation	Amino Acid Metabolism	4.1.1.18		N	0	1000	0	1
R00465	glycolate:NADP+ oxidoreductase	[c] : C00160 + C00006 <==> C00048 + C00005 + C00080	Glyoxylate and dicarboxylate metabolism	Carbohydrate Metabolism	1.1.1.79	( Unigene25077_A0A and Unigene50679_A0A )	Y	-1000	1000	0	2
R00482	L-Aspartate:ammonia ligase (ADP-forming)	[c] : C00002 + C00049 + C00014 <==> C00008 + C00009 + C00152	Purine metabolism	Nucleotide Metabolism			Y	-1000	1000	0	1
R00483	L-aspartate:ammonia ligase (AMP-forming)	[c] : C00002 + C00049 + C00014 <==> C00020 + C00013 + C00152	Alanine, aspartate and glutamate metabolism	Amino Acid Metabolism	6.3.1.1;6.3.5.4		N	0	1000	0	1
R00485	L-Asparagine amidohydrolase	[c] : C00152 + C00001 <==> C00049 + C00014	Alanine, aspartate and glutamate metabolism	Amino Acid Metabolism	3.5.1.1;3.5.1.38		N	0	1000	0	1
R00486	3-Cyano-L-alanine aminohydrolase	[c] : C02512 + 2 C00001 <==> C00049 + C00014	Cyanoamino acid metabolism	Metabolism of Other Amino Acids	3.5.5.4		N	0	1000	0	1
R00489	L-aspartate 1-carboxy-lyase (beta-alanine-forming)	[c] : C00049 <==> C00099 + C00011	beta-Alanine metabolism	Metabolism of Other Amino Acids	4.1.1.11;4.1.1.15		N	0	1000	0	2
R00494	glutathione gamma-glutamylaminopeptidase	[c] : C00051 + C00001 <==> C01419 + C00025	Glutathione metabolism	Metabolism of Other Amino Acids	2.3.2.2	( Unigene9404_A0A and Unigene45196_A0A )	N	0	1000	0	2
R00497	gamma-L-glutamyl-L-cysteine:glycine ligase (ADP-forming)	[c] : C00002 + C00669 + C00037 <==> C00008 + C00009 + C00051	Glutathione metabolism	Metabolism of Other Amino Acids	6.3.2.3	Unigene40467_A0A	N	0	1000	0	2
R00503	UDP-galactose:D-glucose 4-beta-D-galactosyltransferase	[c] : C00052 + C00267 <==> C00015 + C00243	Galactose metabolism	Carbohydrate Metabolism	2.4.1.22	( Unigene45695_A0A and Unigene16162_A0A and Unigene53169_A0A ) or ( Unigene54373_A0A and Unigene27218_A0A )	N	0	1000	0	2
R00507	3'-phosphoadenylyl-sulfate sulfohydrolase;3'-phosphoadenylyl-sulfate nucleotidohydrolase	[c] : C00053 + C00001 <==> C00059 + C00054	Purine metabolism	Nucleotide Metabolism	3.6.1.9;3.6.2.2	( Unigene15522_A0A and Unigene6586_A0A and Unigene35482_A0A and Unigene22325_A0A and Unigene13055_A0A and Unigene16733_A0A and Unigene24143_A0A and Unigene47033_A0A )	N	0	1000	0	2
R00508	3'-Phospho-5'-adenylyl sulfate 3'-phosphohydrolase	[c] : C00053 + C00001 <==> C00224 + C00009	Sulfur metabolism	Energy Metabolism	3.1.3.7	( Unigene2685_A0A and Unigene16892_A0A and Unigene53638_A0A and Unigene44347_A0A and Unigene35091_A0A )	N	0	1000	0	2
R00509	ATP:adenylylsulfate 3'-phosphotransferase	[c] : C00002 + C00224 <==> C00008 + C00053	Purine metabolism	Nucleotide Metabolism	2.7.1.25	Unigene49269_A0A	N	0	1000	0	2
R00511	Cytidine-5'-monophosphate phosphohydrolase	[c] : C00055 + C00001 <==> C00475 + C00009	Pyrimidine metabolism	Nucleotide Metabolism	3.1.3.5	( Unigene49556_A0A and Unigene39746_A0A and Unigene11171_A0A and Unigene50486_A0A and Unigene24749_A0A and Unigene6641_A0A and Unigene38108_A0A and Unigene22160_A0A and Unigene43269_A0A )	N	0	1000	0	2
R00512	ATP:CMP phosphotransferase	[c] : C00002 + C00055 <==> C00008 + C00112	Pyrimidine metabolism	Nucleotide Metabolism	2.7.4.14	Unigene7801_A0A	Y	-1000	1000	0	2
R00513	ATP:cytidine 5'-phosphotransferase	[c] : C00002 + C00475 <==> C00008 + C00055	Pyrimidine metabolism	Nucleotide Metabolism	2.7.1.48	( Unigene1991_A0A and Unigene26015_A0A and Unigene11982_A0A )	N	0	1000	0	2
R00514	CDP phosphohydrolase	[c] : C00112 + C00001 <==> C00055 + C00009	Pyrimidine metabolism	Nucleotide Metabolism	3.6.1.5	Unigene33812_A0A	N	0	1000	0	2
R00516	UTP:cytidine 5'-phosphotransferase	[c] : C00075 + C00475 <==> C00015 + C00055	Pyrimidine metabolism	Nucleotide Metabolism	2.7.1.48	( Unigene1991_A0A and Unigene26015_A0A and Unigene11982_A0A )	N	0	1000	0	2
R00517	GTP:cytidine 5'-phosphotransferase	[c] : C00044 + C00475 <==> C00035 + C00055	Pyrimidine metabolism	Nucleotide Metabolism	2.7.1.48	( Unigene1991_A0A and Unigene26015_A0A and Unigene11982_A0A )	N	0	1000	0	2
R00519	Formate:NAD+ oxidoreductase	[c] : C00058 + C00003 <==> C00080 + C00011 + C00004	Glyoxylate and dicarboxylate metabolism	Carbohydrate Metabolism	1.2.1.2		Y	-1000	1000	0	1
R00527	S-Formylglutathione hydrolase	[c] : C01031 + C00001 <==> C00058 + C00051	Methane metabolism	Energy Metabolism	3.1.2.12	Unigene46416_A0A	N	0	1000	0	2
R00529	ATP:sulfate adenylyltransferase	[c] : C00002 + C00059 <==> C00013 + C00224	Purine metabolism	Nucleotide Metabolism	2.7.7.4	Unigene49269_A0A	N	0	1000	0	2
R00533	Sulfite:oxygen oxidoreductase	[c] : C00094 + C00007 + C00001 <==> C00059 + C00027	Sulfur metabolism	Energy Metabolism	1.8.3.1	( Unigene26806_A0A and Unigene14966_A0A and Unigene15971_A0A )	N	0	1000	0	2
R00548	riboflavin-5-phosphate phosphohydrolase (acid optimum)	[c] : C00061 + C00001 <==> C00255 + C00009	Riboflavin metabolism	Metabolism of Cofactors and Vitamins	3.1.3.2	( Unigene48672_A0A and Unigene20362_A0A and Unigene3663_A0A and Unigene32_A0A )	N	0	1000	0	2
R00549	ATP:riboflavin 5'-phosphotransferase	[c] : C00002 + C00255 <==> C00008 + C00061	Riboflavin metabolism	Metabolism of Cofactors and Vitamins	2.7.1.26	Unigene46020_A0A	N	0	1000	0	2
R00554	ATP:L-arginine Nomega-phosphotransferase	[c] : C00002 + C00062 <==> C00008 + C05945	Arginine and proline metabolism	Amino Acid Metabolism	2.7.3.3	Unigene26243_A0A	N	0	1000	0	2
R00557	L-Arginine,NADPH:oxygen oxidoreductase (nitric-oxide-forming)	[c] : 2 C00062 + 4 C00007 + 3 C00005 + 3 C00080 <==> 2 C00533 + 2 C00327 + 3 C00006 + 4 C00001	Arginine and proline metabolism	Amino Acid Metabolism	1.14.13.39		Y	-1000	1000	0	2
R00558	L-Arginine,NADPH:oxygen oxidoreductase (N-(omega)-hydroxyarginine-forming)	[c] : C00062 + C00007 + C00005 + C00080 <==> C05933 + C00006 + C00001	Arginine and proline metabolism	Amino Acid Metabolism	1.14.13.39		N	0	1000	0	2
R00559	L-Arginine:oxygen 2-oxidoreductase (decarboxylating)	[c] : C00062 + C00007 <==> C03078 + C00011 + C00001	Arginine and proline metabolism	Amino Acid Metabolism	1.13.12.1		N	0	1000	0	1
R00569	CTP phosphohydrolase	[c] : C00063 + C00001 <==> C00112 + C00009	Pyrimidine metabolism	Nucleotide Metabolism	3.6.1.5	Unigene33812_A0A	N	0	1000	0	2
R00570	ATP:CDP phosphotransferase	[c] : C00002 + C00112 <==> C00008 + C00063	Pyrimidine metabolism	Nucleotide Metabolism	2.7.4.6	( Unigene21044_A0A and Unigene16902_A0A and Unigene26862_A0A and Unigene43803_A0A and Unigene36433_A0A )	Y	-1000	1000	0	2
R00571	UTP:ammonia ligase (ADP-forming)	[c] : C00002 + C00075 + C00014 <==> C00008 + C00009 + C00063	Pyrimidine metabolism	Nucleotide Metabolism	6.3.4.2	( Unigene14540_A0A and Unigene55341_A0A )	N	0	1000	0	2
R00573	UTP:L-glutamine amido-ligase (ADP-forming)	[c] : C00002 + C00075 + C00064 + C00001 <==> C00008 + C00009 + C00063 + C00025	Pyrimidine metabolism	Nucleotide Metabolism	6.3.4.2	( Unigene14540_A0A and Unigene55341_A0A )	N	0	1000	0	2
R00575	hydrogen-carbonate:L-glutamine amido-ligase (ADP-forming, carbamate-phosphorylating)	[c] : 2 C00002 + C00064 + C00288 + C00001 <==> 2 C00008 + C00009 + C00025 + C00169	Pyrimidine metabolism	Nucleotide Metabolism	6.3.5.5	( Unigene30387_A0A and Unigene6608_A0A and Unigene1630_A0A and Unigene46985_A0A and Unigene18455_A0A ) or ( Unigene34199_A0A and Unigene17517_A0A and Unigene15333_A0A and Unigene38421_A0A )	N	0	1000	0	2
R00578	L-aspartate:L-glutamine amido-ligase (AMP-forming)	[c] : C00002 + C00049 + C00064 + C00001 <==> C00020 + C00013 + C00152 + C00025	Alanine, aspartate and glutamate metabolism	Amino Acid Metabolism	6.3.5.4		Y	-1000	1000	0	1
R00582	O-phospho-L-serine phosphohydrolase	[c] : C01005 + C00001 <==> C00065 + C00009	Glycine, serine and threonine metabolism	Amino Acid Metabolism	3.1.3.3		N	0	1000	0	1
R00585	L-Serine:pyruvate aminotransferase	[c] : C00065 + C00022 <==> C00168 + C00041	Glycine, serine and threonine metabolism	Amino Acid Metabolism	2.6.1.51	Unigene10634_A0A	Y	-1000	1000	0	2
R00588	L-Serine:glyoxylate aminotransferase	[c] : C00065 + C00048 <==> C00168 + C00037	Glycine, serine and threonine metabolism	Amino Acid Metabolism	2.6.1.45	Unigene10634_A0A	Y	-1000	1000	0	2
R00602	methanol:hydrogen-peroxide oxidoreductase	[c] : C00132 + C00027 <==> C00067 + 2 C00001	Methane metabolism	Energy Metabolism	1.11.1.6;1.11.1.7	( ( Unigene18849_A0A ) or ( Unigene20461_A0A ) )	N	0	1000	0	2
R00611	sarcosine:acceptor oxidoreductase (demethylating)	[c] : C00213 + C00028 + C00001 <==> C00037 + C00067 + C00030	Glycine, serine and threonine metabolism	Amino Acid Metabolism	1.5.99.1	( Unigene40260_A0A and Unigene50191_A0A and Unigene17728_A0A and Unigene26852_A0A and Unigene17206_A0A and Unigene54985_A0A and Unigene18356_A0A )	N	0	1000	0	2
R00615	Thiamin diphosphate phosphohydrolase	[c] : C00068 + C00001 <==> C01081 + C00009	Thiamine metabolism	Metabolism of Cofactors and Vitamins	3.6.1.15	Unigene35104_A0A	N	0	1000	0	2
R00616	ATP:thiamine-diphosphate phosphotransferase	[c] : C00002 + C00068 <==> C00008 + C03028	Thiamine metabolism	Metabolism of Cofactors and Vitamins	2.7.4.15;2.7.6.2	Unigene47362_A0A	N	0	1000	0	2
R00619	ATP:thiamine diphosphotransferase	[c] : C00002 + C00378 <==> C00020 + C00068	Thiamine metabolism	Metabolism of Cofactors and Vitamins	2.7.6.2	Unigene47362_A0A	N	0	1000	0	2
R00621	formation of 3-Carboxy-1-hydroxypropyl-ThPP	[c] : C00026 + C00068 <==> C05381 + C00011	Citrate cycle (TCA cycle)	Carbohydrate Metabolism	1.2.4.2	( Unigene9169_A0A and Unigene8310_A0A )	N	0	1000	0	2
R00623	primary_alcohol:NAD+ oxidoreductase	[c] : C00226 + C00003 <==> C00071 + C00004 + C00080	Fatty acid metabolism	Lipid Metabolism	1.1.1.1;1.1.1.71	( Unigene49428_A0A and Unigene20718_A0A )	Y	-1000	1000	0	2
R00631	Aldehyde:NAD+ oxidoreductase	[c] : C00162 + C00004 + C00080 <==> C00071 + C00003 + C00001	Fatty acid metabolism	Lipid Metabolism	1.2.1.3;1.2.1.5	( Unigene45813_A0A and Unigene25877_A0A and Unigene25916_A0A and Unigene48344_A0A and Unigene2472_A0A and Unigene27550_A0A and Unigene12647_A0A and Unigene45632_A0A and Unigene30385_A0A and Unigene56244_A0A and Unigene1690_A0A and Unigene24755_A0A and Unigene13946_A0A and Unigene33389_A0A and Unigene22602_A0A ) or ( Unigene48345_A0A )	N	0	1000	0	2
R00648	L-Methionine:oxygen oxidoreductase (deaminating)	[c] : C01180 + C00014 + C00027 <==> C00073 + C00001 + C00007	Cysteine and methionine metabolism	Amino Acid Metabolism	1.4.3.2		N	0	1000	0	1
R00658	2-phospho-D-glycerate hydro-lyase (phosphoenolpyruvate-forming)	[c] : C00631 <==> C00074 + C00001	Glycolysis / Gluconeogenesis	Carbohydrate Metabolism	4.2.1.11	Unigene18856_A0A	Y	-1000	1000	0	2
R00667	L-Ornithine:2-oxo-acid aminotransferase	[c] : C00077 + C00026 <==> C01165 + C00025	Arginine and proline metabolism	Amino Acid Metabolism	2.6.1.13		Y	-1000	1000	0	1
R00669	N2-Acetyl-L-ornithine amidohydrolase	[c] : C00437 + C00001 <==> C00033 + C00077	Arginine and proline metabolism	Amino Acid Metabolism	3.5.1.14;3.5.1.16	( Unigene3143_A0A and Unigene4245_A0A ) or ( Unigene38022_A0A )	N	0	1000	0	2
R00670	L-ornithine carboxy-lyase (putrescine-forming)	[c] : C00077 <==> C00134 + C00011	Arginine and proline metabolism	Amino Acid Metabolism	4.1.1.17	Unigene18872_A0A	N	0	1000	0	2
R00671	L-ornithine ammonia-lyase (cyclizing; L-proline-forming)	[c] : C00077 <==> C00148 + C00014	Arginine and proline metabolism	Amino Acid Metabolism	4.3.1.12		Y	-1000	1000	0	1
R00672	ornithine racemase	[c] : C00077 <==> C00515	D-Arginine and D-ornithine metabolism	Metabolism of Other Amino Acids	5.1.1.9;5.1.1.10;5.1.1.12		Y	-1000	1000	0	1
R00678	L-tryptophan:oxygen 2,3-oxidoreductase (decyclizing)	[c] : C00078 + C00007 <==> C02700	Tryptophan metabolism	Amino Acid Metabolism	1.13.11.11;1.13.11.52	Unigene10220_A0A	N	0	1000	0	2
R00679	L-tryptophan:oxygen 2-oxidoreductase (decarboxylating)	[c] : C00078 + C00007 <==> C02693 + C00011 + C00001	Tryptophan metabolism	Amino Acid Metabolism	1.13.12.3		N	0	1000	0	1
R00685	L-Tryptophan decarboxy-lyase	[c] : C00078 <==> C00398 + C00011	Tryptophan metabolism	Amino Acid Metabolism	4.1.1.28		N	0	1000	0	2
R00694	L-Phenylalanine:2-oxoglutarate aminotransferase	[c] : C00166 + C00025 <==> C00079 + C00026	Phenylalanine metabolism	Amino Acid Metabolism	2.6.1.1;2.6.1.5;2.6.1.9;2.6.1.57	( Unigene48841_A0A and Unigene8075_A0A and Unigene41064_A0A )	Y	-1000	1000	0	2
R00697	L-phenylalanine ammonia-lyase (trans-cinnamate-forming)	[c] : C00079 <==> C00423 + C00014	Phenylalanine metabolism	Amino Acid Metabolism	4.3.1.24;4.3.1.25		N	0	1000	0	1
R00698	L-phenylalanine:oxygen oxidoreductase (decarboxylating)	[c] : C00079 + C00007 <==> C02505 + C00011	Phenylalanine metabolism	Amino Acid Metabolism	1.11.1.7	Unigene20461_A0A	N	0	1000	0	2
R00699	L-phenylalanine carboxy-lyase (phenylethylamine-forming)	[c] : C00079 <==> C05332 + C00011	Phenylalanine metabolism	Amino Acid Metabolism	4.1.1.28;4.1.1.53		N	0	1000	0	2
R00703	(S)-Lactate:NAD+ oxidoreductase	[c] : C00186 + C00003 <==> C00022 + C00004 + C00080	Glycolysis / Gluconeogenesis	Carbohydrate Metabolism	1.1.1.27	( Unigene20768_A0A and Unigene20767_A0A )	Y	-1000	1000	0	2
R00705	3-Oxopropanoate:NAD+ oxidoreductase (decarboxylating, CoA-acetylating)	[c] : C00222 + C00010 + C00003 <==> C00024 + C00011 + C00004 + C00080	Inositol phosphate metabolism	Carbohydrate Metabolism	1.2.1.18;1.2.1.27	( Unigene8071_A0A and Unigene8072_A0A and Unigene8073_A0A )	N	0	1000	0	2
R00707	(S)-1-pyrroline-5-carboxylate:NAD+ oxidoreductase	[c] : C03912 + C00003 + 2 C00001 <==> C00025 + C00004 + C00080	Alanine, aspartate and glutamate metabolism	Amino Acid Metabolism	1.5.1.12	( Unigene22989_A0A and Unigene26663_A0A )	Y	-1000	1000	0	2
R00708	(S)-1-pyrroline-5-carboxylate:NADP+ oxidoreductase	[c] : C03912 + C00006 + 2 C00001 <==> C00025 + C00005 + C00080	Alanine, aspartate and glutamate metabolism	Amino Acid Metabolism	1.5.1.12	( Unigene22989_A0A and Unigene26663_A0A )	Y	-1000	1000	0	2
R00709	Isocitrate:NAD+ oxidoreductase (decarboxylating)	[c] : C00311 + C00003 <==> C00026 + C00011 + C00004 + C00080	Citrate cycle (TCA cycle)	Carbohydrate Metabolism	1.1.1.41;1.1.1.286	( Unigene13741_A0A and Unigene49997_A0A and Unigene41898_A0A and Unigene46168_A0A and Unigene40645_A0A and Unigene1829_A0A and Unigene35288_A0A ) or ( Unigene2693_A0A )	Y	-1000	1000	0	2
R00710	Acetaldehyde:NAD+ oxidoreductase	[c] : C00084 + C00003 + C00001 <==> C00033 + C00004 + C00080	Glycolysis / Gluconeogenesis	Carbohydrate Metabolism	1.2.1.3;1.2.1.5	( Unigene45813_A0A and Unigene25877_A0A and Unigene25916_A0A and Unigene48344_A0A and Unigene2472_A0A and Unigene27550_A0A and Unigene12647_A0A and Unigene45632_A0A and Unigene30385_A0A and Unigene56244_A0A and Unigene1690_A0A and Unigene24755_A0A and Unigene13946_A0A and Unigene33389_A0A and Unigene22602_A0A ) or ( Unigene48345_A0A )	Y	-1000	1000	0	2
R00711	Acetaldehyde:NADP+ oxidoreductase	[c] : C00084 + C00006 + C00001 <==> C00033 + C00005 + C00080	Glycolysis / Gluconeogenesis	Carbohydrate Metabolism	1.2.1.4;1.2.1.5	( Unigene25877_A0A and Unigene2472_A0A ) or ( Unigene48345_A0A )	Y	-1000	1000	0	2
R00713	Succinate-semialdehyde:NAD+ oxidoreductase	[c] : C00232 + C00003 + C00001 <==> C00042 + C00004 + C00080	Alanine, aspartate and glutamate metabolism	Amino Acid Metabolism	1.2.1.16;1.2.1.24	( Unigene48289_A0A and Unigene22437_A0A and Unigene47940_A0A ) or ( Unigene22645_A0A )	Y	-1000	1000	0	2
R00716	N6-(L-1,3-Dicarboxypropyl)-L-lysine:NADP+ oxidoreductase (L-lysine-forming)	[c] : C00449 + C00006 + C00001 <==> C00047 + C00026 + C00005 + C00080	Lysine biosynthesis	Amino Acid Metabolism	1.5.1.8	( Unigene13689_A0A and Unigene13205_A0A and Unigene49837_A0A and Unigene49255_A0A )	Y	-1000	1000	0	2
R00717	Glycolate:NAD+ oxidoreductase	[c] : C00160 + C00003 <==> C00048 + C00004 + C00080	Glyoxylate and dicarboxylate metabolism	Carbohydrate Metabolism	1.1.1.26;1.1.1.29	( Unigene25077_A0A and Unigene50679_A0A )	Y	-1000	1000	0	2
R00719	ITP phosphohydrolase	[c] : C00104 + C00009 <==> C00081 + C00001	Purine metabolism	Nucleotide Metabolism	3.6.1.5	Unigene33812_A0A	N	0	1000	0	2
R00722	ATP:IDP phosphotransferase	[c] : C00002 + C00104 <==> C00008 + C00081	Purine metabolism	Nucleotide Metabolism	2.7.4.6	( Unigene21044_A0A and Unigene16902_A0A and Unigene26862_A0A and Unigene43803_A0A and Unigene36433_A0A )	Y	-1000	1000	0	2
R00726	ITP:oxaloacetate carboxy-lyase (adding ITP; phosphoenolpyruvate-forming);ITP:oxaloacetate carboxy-lyase (transphosphorylating)	[c] : C00081 + C00036 <==> C00104 + C00074 + C00011	Glycolysis / Gluconeogenesis	Carbohydrate Metabolism	4.1.1.32	Unigene18735_A0A	N	0	1000	0	2
R00727	Succinate:CoA ligase (IDP-forming)	[c] : C00081 + C00042 + C00010 <==> C00104 + C00009 + C00091	Citrate cycle (TCA cycle)	Carbohydrate Metabolism	6.2.1.4	( Unigene44983_A0A and Unigene40794_A0A and Unigene17368_A0A and Unigene16730_A0A and Unigene18100_A0A and Unigene16621_A0A )	Y	-1000	1000	0	2
R00731	L-Tyrosine:oxygen oxidoreductase	[c] : C00082 + C00007 <==> C00355 + C00001	Tyrosine metabolism	Amino Acid Metabolism	1.14.18.1	( CL492.Contig1_A0A and Unigene18850_A0A and Unigene18852_A0A and Unigene49439_A0A ) or ( Unigene20224_A0A and Unigene20899_A0A and Unigene19440_A0A and Unigene18681_A0A and Unigene18682_A0A )	N	0	1000	0	2
R00734	L-tyrosine:2-oxoglutarate aminotransferase	[c] : C00082 + C00026 <==> C01179 + C00025	Tyrosine metabolism	Amino Acid Metabolism	2.6.1.1;2.6.1.5;2.6.1.9;2.6.1.57	( Unigene48841_A0A and Unigene8075_A0A and Unigene41064_A0A )	Y	-1000	1000	0	2
R00736	L-tyrosine carboxy-lyase (tyramine-forming)	[c] : C00082 <==> C00483 + C00011	Tyrosine metabolism	Amino Acid Metabolism	4.1.1.25;4.1.1.28		N	0	1000	0	2
R00737	L-tyrosine ammonia-lyase (trans-p-hydroxycinnamate-forming)	[c] : C00082 <==> C00811 + C00014	Nitrogen metabolism	Energy Metabolism	4.3.1.23;4.3.1.25		Y	-1000	1000	0	1
R00742	Acetyl-CoA:carbon-dioxide ligase (ADP-forming)	[c] : C00002 + C00024 + C00288 <==> C00008 + C00009 + C00083	Pyruvate metabolism	Carbohydrate Metabolism	6.4.1.2	( Unigene16163_A0A and Unigene13697_A0A and Unigene53956_A0A and Unigene14309_A0A and Unigene34164_A0A and Unigene410_A0A and Unigene35649_A0A and Unigene52673_A0A and Unigene27707_A0A and Unigene52744_A0A and Unigene43387_A0A ) or ( Unigene43817_A0A )	N	0	1000	0	2
R00746	Ethanol:NADP+ oxidoreductase	[c] : C00469 + C00006 <==> C00084 + C00005 + C00080	Glycolysis / Gluconeogenesis	Carbohydrate Metabolism	1.1.1.2;1.1.1.71	( Unigene26785_A0A and Unigene225_A0A and Unigene42171_A0A )	Y	-1000	1000	0	2
R00747	2-Phosphonoacetaldehyde phosphonohydrolase	[c] : C03167 + C00001 <==> C00084 + C00009	Phosphonate and phosphinate metabolism	Metabolism of Other Amino Acids	3.11.1.1	( Unigene2068_A0A and Unigene22427_A0A )	N	0	1000	0	2
R00751	L-threonine acetaldehyde-lyase (glycine-forming)	[c] : C00188 <==> C00037 + C00084	Glycine, serine and threonine metabolism	Amino Acid Metabolism	4.1.2.5		Y	-1000	1000	0	2
R00754	ethanol:NAD+ oxidoreductase	[c] : C00469 + C00003 <==> C00084 + C00004 + C00080	Glycolysis / Gluconeogenesis	Carbohydrate Metabolism	1.1.1.1;1.1.1.71	( Unigene49428_A0A and Unigene20718_A0A )	Y	-1000	1000	0	2
R00762	D-Fructose-1,6-bisphosphate 1-phosphohydrolase	[c] : C00354 + C00001 <==> C00085 + C00009	Methane metabolism	Energy Metabolism	3.1.3.11	Unigene7796_A0A	N	0	1000	0	2
R00765	D-glucosamine-6-phosphate aminohydrolase (ketol isomerizing);D-glucosamine-6-phosphate ketol-isomerase(deaminating)	[c] : C00352 + C00001 <==> C00085 + C00014	Amino sugar and nucleotide sugar metabolism	Carbohydrate Metabolism	3.5.99.6	Unigene49843_A0A	Y	-1000	1000	0	2
R00768	L-glutamine:D-fructose-6-phosphate isomerase (deaminating);L-glutamine:D-fructose-6-phosphate aminotransferase (hexose isomerizing)	[c] : C00064 + C00085 <==> C00025 + C00352	Alanine, aspartate and glutamate metabolism	Amino Acid Metabolism	2.6.1.16	( Unigene45896_A0A and Unigene6995_A0A and Unigene29551_A0A )	N	0	1000	0	2
R00782	L-Cysteine hydrogen-sulfide-lyase (deaminating; pyruvate-forming)	[c] : C00097 + C00001 <==> C00283 + C00022 + C00014	Cysteine and methionine metabolism	Amino Acid Metabolism	4.4.1.1;4.4.1.8	( Unigene6453_A0A and Unigene6575_A0A and Unigene6574_A0A )	Y	-1000	1000	0	2
R00801	sucrose glucohydrolase	[c] : C00089 + C00001 <==> C00095 + C00267	Galactose metabolism	Carbohydrate Metabolism	3.2.1.20;3.2.1.48	( Unigene9371_A0A and Unigene50561_A0A and Unigene16266_A0A and Unigene50408_A0A and Unigene7366_A0A and Unigene40494_A0A and Unigene14018_A0A and Unigene29636_A0A ) or ( Unigene42872_A0A and Unigene47450_A0A and Unigene15323_A0A and Unigene23697_A0A and Unigene23976_A0A )	N	0	1000	0	2
R00802	sucrose alpha-glucohydrolase	[c] : C00089 + C00001 <==> C02336 + C00267	Starch and sucrose metabolism	Carbohydrate Metabolism	3.2.1.20;3.2.1.26;3.2.1.48	( Unigene9371_A0A and Unigene50561_A0A and Unigene16266_A0A and Unigene50408_A0A and Unigene7366_A0A and Unigene40494_A0A and Unigene14018_A0A and Unigene29636_A0A ) or ( Unigene42872_A0A and Unigene47450_A0A and Unigene15323_A0A and Unigene23697_A0A and Unigene23976_A0A )	N	0	1000	0	2
R00829	Succinyl-CoA:acetyl-CoA C-acyltransferase;beta-ketoadipyl-CoA thiolase	[c] : C00010 + C02232 <==> C00091 + C00024	Benzoate degradation	Xenobiotics Biodegradation and Metabolism	2.3.1.16;2.3.1.174	Unigene45487_A0A	N	0	1000	0	2
R00830	succinyl-CoA:glycine C-succinyltransferase (decarboxylating)	[c] : C00091 + C00037 <==> C00430 + C00010 + C00011	Glycine, serine and threonine metabolism	Amino Acid Metabolism	2.3.1.37		N	0	1000	0	1
R00833	(R)-Methylmalonyl-CoA CoA-carbonylmutase	[c] : C01213 <==> C00091	Valine, leucine and isoleucine degradation	Amino Acid Metabolism	5.4.99.2	( Unigene40619_A0A and Unigene42230_A0A )	N	0	1000	0	2
R00842	sn-Glycerol-3-phosphate:NAD+ 2-oxidoreductase	[c] : C00093 + C00003 <==> C00111 + C00004 + C00080	Glycerophospholipid metabolism	Lipid Metabolism	1.1.1.8;1.1.1.94	( Unigene53684_A0A and Unigene2190_A0A )	Y	-1000	1000	0	2
R00847	ATP:glycerol 3-phosphotransferase	[c] : C00002 + C00116 <==> C00008 + C00093	Glycerolipid metabolism	Lipid Metabolism	2.7.1.30	Unigene55087_A0A	N	0	1000	0	2
R00848	sn-Glycerol-3-phosphate:(acceptor) 2-oxidoreductase	[c] : C00093 + C00016 <==> C00111 + C01352	Glycerophospholipid metabolism	Lipid Metabolism	1.1.5.3	Unigene8989_A0A	Y	-1000	1000	0	2
R00851	acyl-CoA:sn-glycerol-3-phosphate 1-O-acyltransferase	[c] : C00093 + C00040 <==> C00681 + C00010	Glycerolipid metabolism	Lipid Metabolism	2.3.1.15	( Unigene36361_A0A and Unigene1648_A0A and Unigene54712_A0A and Unigene53244_A0A ) or ( Unigene132_A0A )	N	0	1000	0	2
R00866	ATP:D-fructose 1-phosphotransferase	[c] : C00002 + C00095 <==> C00008 + C01094	Fructose and mannose metabolism	Carbohydrate Metabolism	2.7.1.3		N	0	1000	0	1
R00867	ATP:D-fructose 6-phosphotransferase	[c] : C00002 + C00095 <==> C00008 + C05345	Fructose and mannose metabolism	Carbohydrate Metabolism	2.7.1.1;2.7.1.4	( Unigene55974_A0A and Unigene47170_A0A and Unigene33700_A0A and Unigene9255_A0A )	N	0	1000	0	2
R00875	D-Glucitol:NAD+ 2-oxidoreductase	[c] : C00794 + C00003 <==> C00095 + C00004 + C00080	Fructose and mannose metabolism	Carbohydrate Metabolism	1.1.1.14;1.1.1.15	( Unigene9354_A0A and Unigene10080_A0A and Unigene10949_A0A )	Y	-1000	1000	0	2
R00878	alpha-D-Glucose aldose-ketose-isomerase	[c] : C00267 <==> C00095	Fructose and mannose metabolism	Carbohydrate Metabolism	5.3.1.5	Unigene7919_A0A	Y	-1000	1000	0	2
R00885	GTP:alpha-D-mannose-1-phosphate guanylyltransferase	[c] : C00044 + C00636 <==> C00013 + C00096	Fructose and mannose metabolism	Carbohydrate Metabolism	2.7.7.13	( Unigene27455_A0A and Unigene17623_A0A and Unigene52619_A0A )	N	0	1000	0	2
R00888	GDP-mannose 4,6-hydro-lyase (GDP-4-dehydro-6-deoxy-D-mannose-forming)	[c] : C00096 <==> C01222 + C00001	Fructose and mannose metabolism	Carbohydrate Metabolism	4.2.1.47	( Unigene28533_A0A and Unigene56545_A0A )	N	0	1000	0	2
R00891	L-serine hydro-lyase (adding hydrogen sulfide, L-cysteine-forming)	[c] : C00065 + C00283 <==> C00097 + C00001	Glycine, serine and threonine metabolism	Amino Acid Metabolism	4.2.1.22	Unigene49183_A0A	N	0	1000	0	2
R00892	L-cysteine:NAD+ oxidoreductase;NADH:L-cystine oxidoreductase	[c] : 2 C00097 + C00003 <==> C00491 + C00080 + C00004	Cysteine and methionine metabolism	Amino Acid Metabolism	1.8.1.6		Y	-1000	1000	0	1
R00893	L-Cysteine:oxygen oxidoreductase	[c] : C00097 + C00007 <==> C00606	Cysteine and methionine metabolism	Amino Acid Metabolism	1.13.11.20	Unigene20088_A0A	N	0	1000	0	2
R00894	L-glutamate:L-cysteine gamma-ligase (ADP-forming)	[c] : C00002 + C00025 + C00097 <==> C00008 + C00009 + C00669	Glutathione metabolism	Metabolism of Other Amino Acids	6.3.2.2	( Unigene53501_A0A and Unigene2645_A0A and Unigene55359_A0A and Unigene54073_A0A and Unigene7277_A0A )	N	0	1000	0	2
R00896	L-cysteine:2-oxoglutarate aminotransferase	[c] : C00097 + C00026 <==> C00957 + C00302	Cysteine and methionine metabolism	Amino Acid Metabolism	2.6.1.1	( Unigene48841_A0A and Unigene8075_A0A and Unigene41064_A0A )	Y	-1000	1000	0	2
R00897	O3-acetyl-L-serine:hydrogen-sulfide 2-amino-2-carboxyethyltransferase;	[c] : C00979 + C00283 <==> C00097 + C00033	Cysteine and methionine metabolism	Amino Acid Metabolism	2.5.1.47		Y	-1000	1000	0	2
R00899	L-cysteinylglycine dipeptidase	[c] : C01419 + C00001 <==> C00097 + C00037	Glutathione metabolism	Metabolism of Other Amino Acids	3.4.11.1;3.4.11.2;3.4.11.23;3.4.13.3	( ( Unigene8763_A0A and Unigene35913_A0A and Unigene3366_A0A and Unigene1296_A0A and Unigene15866_A0A ) or ( Unigene31183_A0A ) or ( Unigene5429_A0A and Unigene41693_A0A and Unigene5990_A0A and Unigene24260_A0A and Unigene46844_A0A and Unigene31197_A0A and Unigene2119_A0A ) )	N	0	1000	0	2
R00901	L-cysteine hydrogen-sulfide-lyase (adding sulfite; L-cysteate-forming)	[c] : C00097 + C00094 <==> C00283 + C00506	Cysteine and methionine metabolism	Amino Acid Metabolism	4.4.1.10		N	0	1000	0	1
R00904	3-aminopropanal:NAD+ oxidoreductase	[c] : C05665 + C00003 + C00001 <==> C00099 + C00004 + C00080	beta-Alanine metabolism	Metabolism of Other Amino Acids	1.2.1.3;1.2.1.5;1.2.1.19	( Unigene45813_A0A and Unigene25877_A0A and Unigene25916_A0A and Unigene48344_A0A and Unigene2472_A0A and Unigene27550_A0A and Unigene12647_A0A and Unigene45632_A0A and Unigene30385_A0A and Unigene56244_A0A and Unigene1690_A0A and Unigene24755_A0A and Unigene13946_A0A and Unigene33389_A0A and Unigene22602_A0A ) or ( Unigene48345_A0A )	N	0	1000	0	2
R00905	N-Carbamoyl-beta-alanine amidohydrolase	[c] : C02642 + C00001 <==> C00099 + C00011 + C00014	Pyrimidine metabolism	Nucleotide Metabolism	3.5.1.6	Unigene40319_A0A	N	0	1000	0	2
R00908	beta-alanine:2-oxoglutarate aminotransferase	[c] : C00099 + C00026 <==> C00222 + C00025	beta-Alanine metabolism	Metabolism of Other Amino Acids	2.6.1.19;2.6.1.55	Unigene9554_A0A	Y	-1000	1000	0	2
R00924	Propanoyl-CoA:(acceptor) 2,3-oxidoreductase	[c] : C01352 + C00894 <==> C00100 + C00016	beta-Alanine metabolism	Metabolism of Other Amino Acids	1.3.99.3	( Unigene54425_A0A and Unigene53730_A0A )	Y	-1000	1000	0	2
R00926	Propionyladenylate:CoA propionyltransferase	[c] : C00020 + C00100 <==> C05983 + C00010	Propanoate metabolism	Carbohydrate Metabolism	6.2.1.1;6.2.1.17	Unigene45351_A0A	Y	-1000	1000	0	2
R00927	acetyl-CoA:propanoyl-CoA 2-C-acetyltransferase;2-methylacetoacetyl-CoA thiolase	[c] : C00010 + C03344 <==> C00100 + C00024	Valine, leucine and isoleucine degradation	Amino Acid Metabolism	2.3.1.9;2.3.1.16	Unigene45487_A0A	N	0	1000	0	2
R00935	(S)-Methylmalonate semialdehyde:NAD+ oxidoreductase (CoA-propanoylating)	[c] : C06002 + C00010 + C00003 <==> C00100 + C00011 + C00004 + C00080	Valine, leucine and isoleucine degradation	Amino Acid Metabolism	1.2.1.27	( Unigene8071_A0A and Unigene8072_A0A and Unigene8073_A0A )	N	0	1000	0	2
R00936	5,6,7,8-tetrahydrofolate:NAD+ oxidoreductase	[c] : C00101 + C00003 <==> C00415 + C00004 + C00080	One carbon pool by folate	Metabolism of Cofactors and Vitamins	1.5.1.3		Y	-1000	1000	0	1
R00939	5,6,7,8-tetrahydrofolate:NADP+ oxidoreductase	[c] : C00101 + C00006 <==> C00415 + C00005 + C00080	One carbon pool by folate	Metabolism of Cofactors and Vitamins	1.5.1.3		Y	-1000	1000	0	1
R00941	10-formyltetrahydrofolate:NADP+ oxidoreductase	[c] : C00234 + C00006 + C00001 <==> C00101 + C00011 + C00005 + C00080	One carbon pool by folate	Metabolism of Cofactors and Vitamins	1.5.1.6	Unigene8448_A0A	N	0	1000	0	2
R00942	Tetrahydrofolate:L-glutamate gamma-ligase (ADP-forming)	[c] : C00002 + C00101 + C00025 <==> C00008 + C00009 + C09332	Folate biosynthesis	Metabolism of Cofactors and Vitamins	6.3.2.17	( Unigene54119_A0A and CL1625.Contig1_A0A and Unigene10764_A0A and Unigene51625_A0A and Unigene14395_A0A )	Y	-1000	1000	0	2
R00943	Formate:tetrahydrofolate ligase (ADP-forming)	[c] : C00101 + C00058 + C00002 <==> C00008 + C00009 + C00234	One carbon pool by folate	Metabolism of Cofactors and Vitamins	6.3.4.3		N	0	1000	0	1
R00944	10-Formyltetrahydrofolate amidohydrolase	[c] : C00234 + C00001 <==> C00058 + C00101	Glyoxylate and dicarboxylate metabolism	Carbohydrate Metabolism	3.5.1.10		N	0	1000	0	1
R00945	5,10-Methylenetetrahydrofolate:glycine hydroxymethyltransferase	[c] : C00143 + C00037 + C00001 <==> C00101 + C00065	Glycine, serine and threonine metabolism	Amino Acid Metabolism	2.1.2.1	( Unigene39808_A0A and Unigene46039_A0A and Unigene53763_A0A and Unigene38757_A0A and Unigene52346_A0A )	Y	-1000	1000	0	2
R00946	5-Methyltetrahydrofolate:L-homocysteine S-methyltransferase	[c] : C00440 + C00155 <==> C00101 + C00073	Cysteine and methionine metabolism	Amino Acid Metabolism	2.1.1.13	( Unigene14812_A0A and Unigene4513_A0A and Unigene51972_A0A and Unigene4090_A0A and Unigene4171_A0A and Unigene33399_A0A and Unigene16132_A0A )	N	0	1000	0	2
R00955	UDP-glucose:alpha-D-galactose-1-phosphate uridylyltransferase	[c] : C00029 + C00446 <==> C00103 + C00052	Galactose metabolism	Carbohydrate Metabolism	2.7.7.12	( Unigene28258_A0A and Unigene44332_A0A )	Y	-1000	1000	0	2
R00959	alpha-D-Glucose 1-phosphate 1,6-phosphomutase	[c] : C00103 <==> C00668	Glycolysis / Gluconeogenesis	Carbohydrate Metabolism	5.4.2.2;5.4.2.5	( Unigene45872_A0A and Unigene40267_A0A and Unigene11367_A0A )	Y	-1000	1000	0	2
R00961	IDP phosphohydrolase	[c] : C00104 + C00001 <==> C00130 + C00009	Purine metabolism	Nucleotide Metabolism	3.6.1.5;3.6.1.6	( ( Unigene4191_A0A and Unigene23117_A0A and Unigene23144_A0A ) or ( Unigene36433_A0A ) )	N	0	1000	0	2
R00962	ITP:cytidine 5'-phosphotransferase	[c] : C00081 + C00475 <==> C00104 + C00055	Pyrimidine metabolism	Nucleotide Metabolism	2.7.1.48	( Unigene1991_A0A and Unigene26015_A0A and Unigene11982_A0A )	N	0	1000	0	2
R00963	Uridine 5'-monophosphate phosphohydrolase	[c] : C00105 + C00001 <==> C00299 + C00009	Pyrimidine metabolism	Nucleotide Metabolism	3.1.3.5	( Unigene49556_A0A and Unigene39746_A0A and Unigene11171_A0A and Unigene50486_A0A and Unigene24749_A0A and Unigene6641_A0A and Unigene38108_A0A and Unigene22160_A0A and Unigene43269_A0A )	N	0	1000	0	2
R00964	ATP:uridine 5'-phosphotransferase	[c] : C00002 + C00299 <==> C00008 + C00105	Pyrimidine metabolism	Nucleotide Metabolism	2.7.1.48	( Unigene1991_A0A and Unigene26015_A0A and Unigene11982_A0A )	N	0	1000	0	2
R00966	UMP:diphosphate phospho-alpha-D-ribosyltransferase	[c] : C00105 + C00013 <==> C00106 + C00119	Pyrimidine metabolism	Nucleotide Metabolism	2.4.2.9	Unigene24585_A0A	Y	-1000	1000	0	2
R00967	UTP:uridine 5'-phosphotransferase	[c] : C00075 + C00299 <==> C00015 + C00105	Pyrimidine metabolism	Nucleotide Metabolism	2.7.1.48	( Unigene1991_A0A and Unigene26015_A0A and Unigene11982_A0A )	N	0	1000	0	2
R00968	GTP:uridine 5'-phosphotransferase	[c] : C00044 + C00299 <==> C00035 + C00105	Pyrimidine metabolism	Nucleotide Metabolism	2.7.1.48	( Unigene1991_A0A and Unigene26015_A0A and Unigene11982_A0A )	N	0	1000	0	2
R00969	P1,P4-bis(5'-uridyl)-tetraphosphate uridylohydrolase	[c] : C06198 + C00001 <==> C00075 + C00105	Pyrimidine metabolism	Nucleotide Metabolism	3.6.1.17	Unigene27515_A0A	N	0	1000	0	2
R00970	ITP:uridine 5'-phosphotransferase	[c] : C00081 + C00299 <==> C00104 + C00105	Pyrimidine metabolism	Nucleotide Metabolism	2.7.1.48	( Unigene1991_A0A and Unigene26015_A0A and Unigene11982_A0A )	N	0	1000	0	2
R00978	5,6-Dihydrouracil:NADP+ oxidoreductase	[c] : C00429 + C00006 <==> C00106 + C00005 + C00080	Pyrimidine metabolism	Nucleotide Metabolism	1.3.1.2	( Unigene45570_A0A and Unigene26090_A0A and Unigene24970_A0A and Unigene9974_A0A and Unigene25528_A0A and Unigene18740_A0A and Unigene16757_A0A and Unigene32515_A0A )	Y	-1000	1000	0	2
R00996	L-threonine ammonia-lyase (2-oxobutanoate-forming)	[c] : C00188 <==> C00109 + C00014	Glycine, serine and threonine metabolism	Amino Acid Metabolism	4.3.1.19	( Unigene25892_A0A and Unigene53519_A0A and Unigene27999_A0A )	N	0	1000	0	2
R01000	2-Hydroxybutyrate:NAD+ oxidoreductase	[c] : C05984 + C00003 <==> C00109 + C00004 + C00080	Propanoate metabolism	Carbohydrate Metabolism	1.1.1.27	( Unigene20768_A0A and Unigene20767_A0A )	N	0	1000	0	2
R01001	L-cystathionine cysteine-lyase (deaminating; 2-oxobutanoate-forming)	[c] : C02291 + C00001 <==> C00097 + C00014 + C00109	Glycine, serine and threonine metabolism	Amino Acid Metabolism	4.4.1.1	( Unigene6453_A0A and Unigene6575_A0A and Unigene6574_A0A )	Y	-1000	1000	0	2
R01004	Dolichyl-diphosphate phosphohydrolase	[c] : C00621 + C00001 <==> C00110 + C00009	N-Glycan biosynthesis	Glycan Biosynthesis and Metabolism	3.6.1.43	( Unigene34043_A0A and Unigene3928_A0A )	N	0	1000	0	2
R01005	UDPglucose:dolichyl-phosphate beta-D-glucosyltransferase	[c] : C00029 + C00110 <==> C00015 + C01246	N-Glycan biosynthesis	Glycan Biosynthesis and Metabolism	2.4.1.117	Unigene32740_A0A	N	0	1000	0	2
R01009	GDPmannose:dolichyl-phosphate O-beta-D-mannosyltransferase	[c] : C00096 + C00110 <==> C00035 + C03862	N-Glycan biosynthesis	Glycan Biosynthesis and Metabolism	2.4.1.83	( Unigene31872_A0A ) or ( Unigene479_A0A )	N	0	1000	0	2
R01013	Acyl-CoA:glycerone-phosphate O-acyltransferase	[c] : C00040 + C00111 <==> C00010 + C03372	Glycerophospholipid metabolism	Lipid Metabolism	2.3.1.42		N	0	1000	0	1
R01015	D-glyceraldehyde-3-phosphate aldose-ketose-isomerase	[c] : C00118 <==> C00111	Glycolysis / Gluconeogenesis	Carbohydrate Metabolism	5.3.1.1	( Unigene19969_A0A and Unigene46400_A0A and Unigene7557_A0A )	Y	-1000	1000	0	2
R01021	ATP:choline phosphotransferase	[c] : C00002 + C00114 <==> C00008 + C00588	Glycerophospholipid metabolism	Lipid Metabolism	2.7.1.32	( Unigene20685_A0A and Unigene53121_A0A )	N	0	1000	0	2
R01026	Acetylcholine aectylhydrolase	[c] : C01996 + C00001 <==> C00114 + C00033	Glycerophospholipid metabolism	Lipid Metabolism	3.1.1.7;3.1.1.8	( Unigene50863_A0A and Unigene7966_A0A and Unigene44616_A0A )	N	0	1000	0	2
R01030	sn-Glycero-3-phosphocholine glycerophosphohydrolase	[c] : C00670 + C00001 <==> C00114 + C00093	Glycerophospholipid metabolism	Lipid Metabolism	3.1.4.2;3.1.4.46	Unigene11247_A0A	N	0	1000	0	2
R01036	Glycerol:NAD+ oxidoreductase	[c] : C00116 + C00003 <==> C00577 + C00004 + C00080	Glycerolipid metabolism	Lipid Metabolism	1.1.1.21;1.1.1.72	( Unigene18863_A0A and Unigene26785_A0A and Unigene225_A0A and Unigene42171_A0A )	Y	-1000	1000	0	2
R01041	Glycerol:NADP+ oxidoreductase	[c] : C00116 + C00006 <==> C00577 + C00005 + C00080	Glycerolipid metabolism	Lipid Metabolism	1.1.1.2;1.1.1.21;1.1.1.72	( Unigene18863_A0A and Unigene26785_A0A and Unigene225_A0A and Unigene42171_A0A )	Y	-1000	1000	0	2
R01048	Glycerol hydro-lyase	[c] : C00116 <==> C05999 + C00001	Glycerolipid metabolism	Lipid Metabolism	4.2.1.30		N	0	1000	0	1
R01049	ATP:D-ribose-5-phosphate diphosphotransferase	[c] : C00002 + C00117 <==> C00020 + C00119	Pentose phosphate pathway	Carbohydrate Metabolism	2.7.6.1	( Unigene24641_A0A and Unigene14397_A0A and Unigene3002_A0A and Unigene29803_A0A )	Y	-1000	1000	0	2
R01051	ATP:D-ribose 5-phosphotransferase	[c] : C00002 + C00121 <==> C00008 + C00117	Pentose phosphate pathway	Carbohydrate Metabolism	2.7.1.15	Unigene29362_A0A	Y	-1000	1000	0	2
R01053	Ribose-5-phosphate:ammonia ligase (ADP-forming)	[c] : C00002 + C00117 + C00014 <==> C00008 + C00009 + C03090	Purine metabolism	Nucleotide Metabolism	6.3.4.7		N	0	1000	0	1
R01054	ADP-ribose ribophosphohydrolase	[c] : C00301 + C00001 <==> C00020 + C00117	Purine metabolism	Nucleotide Metabolism	3.6.1.13;3.6.1.21;3.6.1.-	Unigene24019_A0A	N	0	1000	0	2
R01055	uracil hydro-lyase (adding D-ribose 5-phosphate;pseudouridine-5'-phosphate-forming)	[c] : C00106 + C00117 <==> C01168 + C00001	Pyrimidine metabolism	Nucleotide Metabolism	4.2.1.70	Unigene10099_A0A	Y	-1000	1000	0	2
R01056	D-ribose-5-phosphate aldose-ketose-isomerase	[c] : C00117 <==> C00199	Pentose phosphate pathway	Carbohydrate Metabolism	5.3.1.6	Unigene13686_A0A	Y	-1000	1000	0	2
R01057	D-Ribose 1,5-phosphomutase	[c] : C00620 <==> C00117	Pentose phosphate pathway	Carbohydrate Metabolism	5.4.2.2;5.4.2.7	( Unigene45872_A0A and Unigene40267_A0A and Unigene11367_A0A )	Y	-1000	1000	0	2
R01061	D-glyceraldehyde-3-phosphate:NAD+ oxidoreductase (phosphorylating)	[c] : C00118 + C00009 + C00003 <==> C00236 + C00004 + C00080	Glycolysis / Gluconeogenesis	Carbohydrate Metabolism	1.2.1.12;1.2.1.59	( Unigene18683_A0A and Unigene12349_A0A and Unigene49381_A0A and Unigene23832_A0A and Unigene48308_A0A and CL2055.Contig1_A0A and Unigene16648_A0A and Unigene2203_A0A and Unigene28565_A0A and Unigene40817_A0A and Unigene40818_A0A and Unigene18186_A0A and Unigene1292_A0A ) or ( Unigene1204_A0A )	Y	-1000	1000	0	2
R01066	2-deoxy-D-ribose-5-phosphate acetaldehyde-lyase (D-glyceraldehyde-3-phosphate-forming)	[c] : C00673 <==> C00118 + C00084	Pentose phosphate pathway	Carbohydrate Metabolism	4.1.2.4	( Unigene53278_A0A and Unigene531_A0A )	Y	-1000	1000	0	2
R01067	D-Fructose 6-phosphate:D-glyceraldehyde-3-phosphate glycolaldehyde transferase	[c] : C00085 + C00118 <==> C00279 + C00231	Carbon fixation in photosynthetic organisms	Energy Metabolism	2.2.1.1	Unigene20167_A0A	N	0	1000	0	2
R01068	D-fructose-1,6-bisphosphate D-glyceraldehyde-3-phosphate-lyase (glycerone-phosphate-forming)	[c] : C00354 <==> C00111 + C00118	Carbon fixation in photosynthetic organisms	Energy Metabolism	4.1.2.13	( Unigene19089_A0A and Unigene18845_A0A and Unigene19088_A0A )	Y	-1000	1000	0	2
R01069	D-tagatose 1,6-bisphosphate D-glyceraldehyde-3-phosphate-lyase (glycerone-phosphate-forming)	[c] : C03785 <==> C00111 + C00118	Galactose metabolism	Carbohydrate Metabolism	4.1.2.40		Y	-1000	1000	0	1
R01070	beta-D-fructose-1,6-bisphosphate D-glyceraldehyde-3-phosphate-lyase (glycerone-phosphate-forming)	[c] : C05378 <==> C00111 + C00118	Glycolysis / Gluconeogenesis	Carbohydrate Metabolism	4.1.2.13	( Unigene19089_A0A and Unigene18845_A0A and Unigene19088_A0A )	Y	-1000	1000	0	2
R01074	biotin:CoA ligase (AMP-forming);biotin:apo-[carboxylase] ligase (AMP-forming);ATP:biotin adenylyltransferase	[c] : C00002 + C00120 <==> C00013 + C05921	Biotin metabolism	Metabolism of Cofactors and Vitamins	6.2.1.11;6.3.4.9;6.3.4.10;6.3.4.11;6.3.4.15	Unigene33339_A0A	N	0	1000	0	2
R01082	(S)-malate hydro-lyase (fumarate-forming)	[c] : C00149 <==> C00122 + C00001	Citrate cycle (TCA cycle)	Carbohydrate Metabolism	4.2.1.2	( Unigene47859_A0A and Unigene48378_A0A )	Y	-1000	1000	0	2
R01083	N6-(1,2-dicarboxyethyl)AMP AMP-lyase (fumarate-forming)	[c] : C03794 <==> C00122 + C00020	Purine metabolism	Nucleotide Metabolism	4.3.2.2	( Unigene22005_A0A and Unigene22817_A0A and Unigene37960_A0A and Unigene23385_A0A )	N	0	1000	0	2
R01086	2-(Nomega-L-arginino)succinate arginine-lyase (fumarate-forming)	[c] : C03406 <==> C00122 + C00062	Alanine, aspartate and glutamate metabolism	Amino Acid Metabolism	4.3.2.1	( Unigene53293_A0A and Unigene54229_A0A )	N	0	1000	0	2
R01090	L-Leucine:2-oxoglutarate aminotransferase	[c] : C00123 + C00026 <==> C00233 + C00025	Valine, leucine and isoleucine degradation	Amino Acid Metabolism	2.6.1.6;2.6.1.42;2.6.1.67	( Unigene7568_A0A ) or ( Unigene32633_A0A )	N	0	1000	0	2
R01092	ATP:D-galactose 1-phosphotransferase	[c] : C00002 + C00124 <==> C00008 + C00446	Galactose metabolism	Carbohydrate Metabolism	2.7.1.6	( Unigene4993_A0A and Unigene34475_A0A and Unigene52363_A0A and CL2142.Contig1_A0A ) or ( Unigene55081_A0A )	N	0	1000	0	2
R01093	galactitol:NAD+ 1-oxidoreductase	[c] : C00124 + C00004 + C00080 <==> C01697 + C00003	Galactose metabolism	Carbohydrate Metabolism	1.1.1.21	( Unigene18863_A0A and Unigene26785_A0A and Unigene225_A0A and Unigene42171_A0A )	Y	-1000	1000	0	2
R01095	galactitol:NADP+ 1-oxidoreductase	[c] : C00124 + C00005 + C00080 <==> C01697 + C00006	Galactose metabolism	Carbohydrate Metabolism	1.1.1.21	( Unigene18863_A0A and Unigene26785_A0A and Unigene225_A0A and Unigene42171_A0A )	Y	-1000	1000	0	2
R01113	Glutathione:L-cystine oxidoreductase	[c] : C00491 + 2 C00051 <==> C00127 + 2 C00097	Cysteine and methionine metabolism	Amino Acid Metabolism	1.8.4.4		N	0	1000	0	1
R01121	ATP:(R)-5-diphosphomevalonate carboxy-lyase (adding ATP; isopentenyl-diphosphate-forming);ATP:(R)-5-diphosphomevalonate carboxy-lyase (dehydrating)	[c] : C00002 + C01143 <==> C00008 + C00009 + C00129 + C00011	Terpenoid backbone biosynthesis	Metabolism of Terpenoids and Polyketides	4.1.1.33		N	0	1000	0	2
R01123	Isopentenyl-diphosphate delta3-delta2-isomerase	[c] : C00129 <==> C00235	Terpenoid backbone biosynthesis	Metabolism of Terpenoids and Polyketides	5.3.3.2	( Unigene10495_A0A and Unigene27808_A0A )	Y	-1000	1000	0	2
R01126	Inosine 5'-monophosphate phosphohydrolase	[c] : C00130 + C00001 <==> C00294 + C00009	Purine metabolism	Nucleotide Metabolism	3.1.3.5	( Unigene49556_A0A and Unigene39746_A0A and Unigene11171_A0A and Unigene50486_A0A and Unigene24749_A0A and Unigene6641_A0A and Unigene38108_A0A and Unigene22160_A0A and Unigene43269_A0A )	N	0	1000	0	2
R01127	IMP 1,2-hydrolase (decyclizing)	[c] : C04734 <==> C00130 + C00001	Purine metabolism	Nucleotide Metabolism	2.1.2.3;3.5.4.10	( Unigene50215_A0A and Unigene6757_A0A and Unigene47649_A0A and Unigene42840_A0A )	Y	-1000	1000	0	2
R01130	IMP:NAD+ oxidoreductase	[c] : C00130 + C00003 + C00001 <==> C00655 + C00004 + C00080	Purine metabolism	Nucleotide Metabolism	1.1.1.205	( Unigene53415_A0A and Unigene10298_A0A and Unigene32069_A0A )	N	0	1000	0	2
R01132	IMP:diphosphate phospho-D-ribosyltransferase	[c] : C00130 + C00013 <==> C00262 + C00119	Purine metabolism	Nucleotide Metabolism	2.4.2.8	Unigene5009_A0A	Y	-1000	1000	0	2
R01134	inosine-5'-phosphate:NADP+ oxidoreductase (aminating);NADH:guanosine-5'-phosphate oxidoreductase (deaminating)	[c] : C00144 + C00005 + C00080 <==> C00130 + C00014 + C00006	Purine metabolism	Nucleotide Metabolism	1.7.1.7	Unigene40509_A0A	N	0	1000	0	2
R01135	IMP:L-aspartate ligase (GDP-forming)	[c] : C00044 + C00130 + C00049 <==> C00035 + C00009 + C03794	Purine metabolism	Nucleotide Metabolism	6.3.4.4	( Unigene55576_A0A and Unigene17539_A0A )	N	0	1000	0	2
R01137	ATP:dADP phosphotransferase	[c] : C00002 + C00206 <==> C00008 + C00131	Purine metabolism	Nucleotide Metabolism	2.7.4.6	( Unigene21044_A0A and Unigene16902_A0A and Unigene26862_A0A and Unigene43803_A0A and Unigene36433_A0A )	Y	-1000	1000	0	2
R01138	dATP:pyruvate 2-O-phosphotransferase	[c] : C00131 + C00022 <==> C00206 + C00074	Purine metabolism	Nucleotide Metabolism	2.7.1.40	( Unigene19080_A0A and Unigene19081_A0A )	Y	-1000	1000	0	2
R01151	Putrescine:oxygen oxidoreductase (deaminating)	[c] : C00134 + C00007 + C00001 <==> C00555 + C00014 + C00027	Arginine and proline metabolism	Amino Acid Metabolism	1.4.3.10;1.4.3.22		Y	-1000	1000	0	1
R01155	putrescine:2-oxoglutarate aminotransferase	[c] : C00134 + C00026 <==> C00555 + C00025	Arginine and proline metabolism	Amino Acid Metabolism	2.6.1.29;2.6.1.82		Y	-1000	1000	0	1
R01167	L-histidine carboxy-lyase (histamine-forming)	[c] : C00135 <==> C00388 + C00011	Histidine metabolism	Amino Acid Metabolism	4.1.1.22;4.1.1.28		N	0	1000	0	2
R01175	Butanoyl-CoA:oxygen 2-oxidoreductase	[c] : C00136 + C00016 <==> C01352 + C00877	Fatty acid metabolism	Lipid Metabolism	1.3.3.6;1.3.8.1;1.3.99.3;1.3.99.-	( ( Unigene16412_A0A and Unigene41487_A0A and Unigene37402_A0A and Unigene52196_A0A and Unigene46557_A0A and Unigene32260_A0A and Unigene22825_A0A and Unigene37932_A0A and Unigene56956_A0A ) or ( Unigene53730_A0A ) or ( Unigene54425_A0A ) )	N	0	1000	0	2
R01177	butanoyl-CoA:acetyl-CoA C-butanoyltransferase	[c] : C00024 + C00136 <==> C00010 + C05269	Fatty acid elongation in mitochondria	Lipid Metabolism	2.3.1.9;2.3.1.16	( ( Unigene30807_A0A and Unigene30868_A0A ) or ( Unigene45487_A0A ) )	N	0	1000	0	2
R01184	myo-Inositol:oxygen oxidoreductase	[c] : C00137 + C00007 <==> C00191 + C00001	Ascorbate and aldarate metabolism	Carbohydrate Metabolism	1.13.99.1	( Unigene56698_A0A and Unigene36221_A0A )	N	0	1000	0	2
R01185	1D-myo-Inositol 1-phosphate phosphohydrolase	[c] : C01177 + C00001 <==> C00137 + C00009	Inositol phosphate metabolism	Carbohydrate Metabolism	3.1.3.25	( Unigene30239_A0A and Unigene43452_A0A and Unigene44347_A0A and Unigene35091_A0A )	N	0	1000	0	2
R01186	1D-myo-Inositol 4-phosphate phosphohydrolase	[c] : C03546 + C00001 <==> C00137 + C00009	Inositol phosphate metabolism	Carbohydrate Metabolism	3.1.3.25	( Unigene30239_A0A and Unigene43452_A0A and Unigene44347_A0A and Unigene35091_A0A )	N	0	1000	0	2
R01187	1D-myo-Inositol 3-phosphate phosphohydrolase	[c] : C04006 + C00001 <==> C00137 + C00009	Streptomycin biosynthesis	Biosynthesis of Other Secondary Metabolites	3.1.3.25	( Unigene30239_A0A and Unigene43452_A0A and Unigene44347_A0A and Unigene35091_A0A )	N	0	1000	0	2
R01199	2-oxobutanoate:ferredoxin 2-oxidoreductase (CoA-propanoylating)	[c] : 2 C00138 + C00100 + C00011 + 2 C00080 <==> 2 C00139 + C00109 + C00010	Propanoate metabolism	Carbohydrate Metabolism	1.2.7.1;1.2.7.2		N	0	1000	0	1
R01201	ATP:N-acetyl-D-glucosamine 6-phosphotransferase	[c] : C00002 + C00140 <==> C00008 + C00357	Amino sugar and nucleotide sugar metabolism	Carbohydrate Metabolism	2.7.1.59	Unigene2463_A0A	Y	-1000	1000	0	2
R01206	[1,4-(N-Acetyl-beta-D-glucosaminyl)]n glycanohydrolase	[c] : C00140 + C00461 <==> C00461 + C00001	Amino sugar and nucleotide sugar metabolism	Carbohydrate Metabolism	3.2.1.14	( Unigene18954_A0A and Unigene21149_A0A and CL214.Contig1_A0A and Unigene24665_A0A ) or ( Unigene49508_A0A and Unigene49741_A0A and Unigene44731_A0A and Unigene45438_A0A and Unigene44916_A0A )	N	0	1000	0	2
R01214	L-Valine:2-oxoglutarate aminotransferase	[c] : C00183 + C00026 <==> C00141 + C00025	Valine, leucine and isoleucine degradation	Amino Acid Metabolism	2.6.1.6;2.6.1.42	( Unigene7568_A0A ) or ( Unigene32633_A0A )	N	0	1000	0	2
R01221	glycine synthase;glycine cleavage system	[c] : C00143 + C00014 + C00011 + C00004 + C00080 <==> C00037 + C00101 + C00003	Nitrogen metabolism	Energy Metabolism	1.4.4.2;1.8.1.4;2.1.2.10	( Unigene34299_A0A and Unigene50446_A0A )	N	0	1000	0	2
R01227	Guanosine 5'-monophosphate phosphohydrolase	[c] : C00144 + C00001 <==> C00387 + C00009	Purine metabolism	Nucleotide Metabolism	3.1.3.5	( Unigene49556_A0A and Unigene39746_A0A and Unigene11171_A0A and Unigene50486_A0A and Unigene24749_A0A and Unigene6641_A0A and Unigene38108_A0A and Unigene22160_A0A and Unigene43269_A0A )	N	0	1000	0	2
R01229	GMP:diphosphate 5-phospho-alpha-D-ribosyltransferase	[c] : C00242 + C00119 <==> C00144 + C00013	Purine metabolism	Nucleotide Metabolism	2.4.2.7;2.4.2.8;2.4.2.22	( ( Unigene34623_A0A ) or ( Unigene5009_A0A ) )	Y	-1000	1000	0	2
R01230	Xanthosine-5'-phosphate:ammonia ligase (AMP-forming)	[c] : C00002 + C00655 + C00014 <==> C00020 + C00013 + C00144	Purine metabolism	Nucleotide Metabolism	6.3.4.1;6.3.5.2	( Unigene14539_A0A and Unigene12067_A0A and Unigene231_A0A )	N	0	1000	0	2
R01231	Xanthosine-5'-phosphate:L-glutamine amido-ligase (AMP-forming)	[c] : C00002 + C00655 + C00064 + C00001 <==> C00020 + C00013 + C00144 + C00025	Purine metabolism	Nucleotide Metabolism	6.3.5.2	( Unigene14539_A0A and Unigene12067_A0A and Unigene231_A0A )	N	0	1000	0	2
R01232	P1,P4-bis(5'-guanosyl)-tetraphosphate guanylylhydrolase	[c] : C00044 + C00144 <==> C01261 + C00001	Purine metabolism	Nucleotide Metabolism	3.6.1.17	Unigene27515_A0A	N	0	1000	0	2
R01234	Guanosine 3',5'-cyclic phosphate 5'-nucleotidohydrolase	[c] : C00942 + C00001 <==> C00144	Purine metabolism	Nucleotide Metabolism	3.1.4.17;3.1.4.35	( ( Unigene48860_A0A and Unigene21113_A0A and Unigene2629_A0A and Unigene39476_A0A and Unigene28301_A0A and Unigene56066_A0A and Unigene14457_A0A and Unigene28484_A0A and Unigene14877_A0A and Unigene11272_A0A and Unigene55805_A0A and Unigene41040_A0A and Unigene56177_A0A and Unigene10608_A0A and Unigene29583_A0A and Unigene19545_A0A and Unigene15456_A0A and Unigene10280_A0A and Unigene44223_A0A a…	N	0	1000	0	2
R01242	3'-Phosphoadenylylsulfate:phenol sulfotransferase	[c] : C00053 + C15584 <==> C00054 + C00850	Sulfur metabolism	Energy Metabolism	2.8.2.1	( Unigene9171_A0A and Unigene50098_A0A and Unigene33416_A0A and Unigene3786_A0A ) or ( Unigene9172_A0A )	N	0	1000	0	2
R01246	L-proline:NAD+ 2-oxidoreductase	[c] : C00148 + C00003 <==> C03564 + C00004 + C00080	Arginine and proline metabolism	Amino Acid Metabolism	1.5.1.1		N	0	1000	0	1
R01248	L-Proline:NAD+ 5-oxidoreductase	[c] : C00148 + C00003 <==> C03912 + C00004 + C00080	Arginine and proline metabolism	Amino Acid Metabolism	1.5.1.2	( Unigene21277_A0A and Unigene32536_A0A )	Y	-1000	1000	0	2
R01249	L-proline:NADP+ 2-oxidoreductase	[c] : C00148 + C00006 <==> C03564 + C00005 + C00080	Arginine and proline metabolism	Amino Acid Metabolism	1.5.1.1		N	0	1000	0	1
R01251	L-Proline:NADP+ 5-oxidoreductase	[c] : C00148 + C00006 <==> C03912 + C00005 + C00080	Arginine and proline metabolism	Amino Acid Metabolism	1.5.1.2	( Unigene21277_A0A and Unigene32536_A0A )	Y	-1000	1000	0	2
R01252	L-Proline,2-oxoglutarate:oxygen oxidoreductase (4-hydroxylating)	[c] : C00148 + C00026 + C00007 <==> C01157 + C00042 + C00011	Arginine and proline metabolism	Amino Acid Metabolism	1.14.11.2	Unigene9107_A0A	N	0	1000	0	2
R01253	L-proline:(acceptor) oxidoreductase	[c] : C00148 + C00028 <==> C03912 + C00030	Arginine and proline metabolism	Amino Acid Metabolism	1.5.99.8	( Unigene38026_A0A and Unigene39437_A0A and Unigene2181_A0A and Unigene50465_A0A and Unigene27570_A0A )	N	0	1000	0	2
R01255	proline racemase	[c] : C00148 <==> C00763	Arginine and proline metabolism	Amino Acid Metabolism	5.1.1.4		N	0	1000	0	1
R01262	glutathione:L-amino-acid 5-glutamyltransferase	[c] : C00051 + C00151 <==> C01419 + C03740	Glutathione metabolism	Metabolism of Other Amino Acids	2.3.2.2	( Unigene9404_A0A and Unigene45196_A0A )	N	0	1000	0	2
R01267	L-asparagine hydro-lyase (3-cyanoalanine-forming)	[c] : C02512 + C00001 <==> C00152	Cyanoamino acid metabolism	Metabolism of Other Amino Acids	4.2.1.65		N	0	1000	0	1
R01271	nicotinamide-D-ribonucleotide:diphosphate phospho-alpha-D-ribosyltransferase	[c] : C00455 + C00013 <==> C00153 + C00119	Nicotinate and nicotinamide metabolism	Metabolism of Cofactors and Vitamins	2.4.2.12	( Unigene56329_A0A and Unigene29239_A0A and Unigene49542_A0A )	Y	-1000	1000	0	2
R01274	Palmitoyl-CoA hydrolase	[c] : C00154 + C00001 <==> C00010 + C00249	Fatty acid elongation in mitochondria	Lipid Metabolism	3.1.2.2;3.1.2.22	( ( Unigene11739_A0A ) or ( Unigene25593_A0A and Unigene36810_A0A ) or ( Unigene33552_A0A ) )	N	0	1000	0	2
R01278	hexadecanoyl-CoA:NADP+ trans-2-oxidoreductase;trans-Hexadec-2-enoyl-CoA reductase	[c] : C05272 + C00005 + C00080 <==> C00154 + C00006	Fatty acid elongation in mitochondria	Lipid Metabolism	1.3.1.8;1.3.1.38	( Unigene28257_A0A and Unigene41946_A0A and Unigene52592_A0A )	N	0	1000	0	2
R01279	Palmitoyl-CoA:oxygen 2-oxidoreductase	[c] : C00154 + C00016 <==> C05272 + C01352	Fatty acid metabolism	Lipid Metabolism	1.3.3.6;1.3.99.3;1.3.99.13;1.3.99.-	( Unigene16412_A0A and Unigene41487_A0A and Unigene37402_A0A and Unigene52196_A0A and Unigene46557_A0A and Unigene32260_A0A and Unigene22825_A0A and Unigene37932_A0A and Unigene56956_A0A ) or ( Unigene39654_A0A and Unigene54425_A0A and Unigene41195_A0A and Unigene49345_A0A and Unigene53730_A0A and Unigene17535_A0A and Unigene43336_A0A and Unigene29187_A0A )	N	0	1000	0	2
R01280	Palmitate:CoA ligase (AMP-forming)	[c] : C00002 + C00249 + C00010 <==> C00020 + C00154 + C00013	Fatty acid metabolism	Lipid Metabolism	6.2.1.3	( Unigene56067_A0A and Unigene16675_A0A and Unigene26290_A0A and Unigene20972_A0A and Unigene48035_A0A and Unigene26575_A0A and Unigene50717_A0A and Unigene30386_A0A and Unigene5316_A0A and Unigene40115_A0A and Unigene39144_A0A and Unigene34656_A0A and Unigene6808_A0A and Unigene54556_A0A and Unigene3191_A0A and Unigene1128_A0A ) or ( Unigene13687_A0A and Unigene615_A0A )	Y	-1000	1000	0	2
R01281	Palmitoyl-CoA:L-serine C-palmitoyltransferase (decarboxylating)	[c] : C00154 + C00065 <==> C02934 + C00010 + C00011	Sphingolipid metabolism	Lipid Metabolism	2.3.1.50	( Unigene40937_A0A and Unigene507_A0A and Unigene4858_A0A and Unigene39309_A0A )	N	0	1000	0	2
R01286	L-cystathionine L-homocysteine-lyase (deaminating; pyruvate-forming)	[c] : C02291 + C00001 <==> C00155 + C00014 + C00022	Cysteine and methionine metabolism	Amino Acid Metabolism	4.4.1.8		N	0	1000	0	1
R01290	L-serine hydro-lyase (adding homocysteine; L-cystathionine-forming)	[c] : C00065 + C00155 <==> C02291 + C00001	Glycine, serine and threonine metabolism	Amino Acid Metabolism	4.2.1.22	Unigene49183_A0A	N	0	1000	0	2
R01295	benzoate,NADPH:oxygen oxidoreductase (4-hydroxylating)	[c] : C00180 + C00007 + C00005 + C00080 <==> C00156 + C00006 + C00001	Benzoate degradation	Xenobiotics Biodegradation and Metabolism	1.14.13.12		N	0	1000	0	1
R01297	4-hydroxybenzoate,NADH:oxygen oxidoreductase (1-hydroxylating, decarboxylating)	[c] : C00156 + C00007 + C00004 + C00080 <==> C00530 + C00011 + C00003 + C00001	Benzoate degradation	Xenobiotics Biodegradation and Metabolism	1.14.13.64		N	0	1000	0	1
R01299	4-hydroxybenzoate,NADPH:oxygen oxidoreductase (1-hydroxylating, decarboxylating)	[c] : C00156 + C00007 + C00005 + C00080 <==> C00530 + C00011 + C00006 + C00001	Benzoate degradation	Xenobiotics Biodegradation and Metabolism	1.14.13.64		N	0	1000	0	1
R01308	formation of 4-Hydroxybenzoate	[c] : C00811 + 2 C00001 + C00003 <==> C00156 + C00033 + C00004 + C00080	Phenylalanine metabolism	Amino Acid Metabolism			N	0	1000	0	1
R01310	Phosphatidylcholine phosphatidohydrolase	[c] : C00157 + C00001 <==> C00416 + C00114	Glycerophospholipid metabolism	Lipid Metabolism	3.1.4.4	( Unigene46312_A0A and Unigene45440_A0A and Unigene28697_A0A and Unigene47010_A0A and Unigene42461_A0A and Unigene52456_A0A and Unigene23240_A0A and Unigene3728_A0A and Unigene31456_A0A ) or ( Unigene32350_A0A )	N	0	1000	0	2
R01315	Phosphatidylcholine 2-acylhydrolase	[c] : C00157 + C00001 <==> C04230 + C00162	Glycerophospholipid metabolism	Lipid Metabolism	3.1.1.4	( Unigene53786_A0A and Unigene13551_A0A and Unigene43493_A0A and Unigene35949_A0A and Unigene29770_A0A and Unigene33536_A0A and Unigene4234_A0A and Unigene45757_A0A and Unigene18772_A0A and Unigene14829_A0A and Unigene39126_A0A and Unigene53444_A0A and Unigene17160_A0A and Unigene27877_A0A )	N	0	1000	0	2
R01317	Phosphatidylcholine 2-acylhydrolase	[c] : C04230 + C00219 <==> C00157 + C00001	Arachidonic acid metabolism	Lipid Metabolism	3.1.1.4	( Unigene53786_A0A and Unigene13551_A0A and Unigene43493_A0A and Unigene35949_A0A and Unigene29770_A0A and Unigene33536_A0A and Unigene4234_A0A and Unigene45757_A0A and Unigene18772_A0A and Unigene14829_A0A and Unigene39126_A0A and Unigene53444_A0A and Unigene17160_A0A and Unigene27877_A0A )	Y	-1000	1000	0	2
R01318	Acyl-CoA:1-acyl-sn-glycero-3-phosphocholine O-acyltransferase	[c] : C00040 + C04230 <==> C00010 + C00157	Glycerophospholipid metabolism	Lipid Metabolism	2.3.1.23	( Unigene35615_A0A and Unigene40212_A0A and Unigene4111_A0A and Unigene41805_A0A and Unigene18276_A0A )	N	0	1000	0	2
R01325	citrate hydro-lyase (cis-aconitate-forming)	[c] : C00158 <==> C00417 + C00001	Citrate cycle (TCA cycle)	Carbohydrate Metabolism	4.2.1.3;4.2.1.4	( Unigene3134_A0A and Unigene24740_A0A and CL359.Contig1_A0A and Unigene8315_A0A and Unigene16333_A0A and Unigene13696_A0A and Unigene32142_A0A )	Y	-1000	1000	0	2
R01326	ATP:D-mannose 6-phosphotransferase	[c] : C00002 + C00159 <==> C00008 + C00275	Fructose and mannose metabolism	Carbohydrate Metabolism	2.7.1.1;2.7.1.7	( Unigene55974_A0A and Unigene47170_A0A and Unigene33700_A0A and Unigene9255_A0A )	N	0	1000	0	2
R01346	L-Asparagine:2-oxo-acid aminotransferase	[c] : C00152 + C00161 <==> C02362 + C00151	Alanine, aspartate and glutamate metabolism	Amino Acid Metabolism	2.6.1.14		N	0	1000	0	1
R01351	1-acylglycerol acylhydrolase	[c] : C01885 + C00001 <==> C00116 + C00162	Glycerolipid metabolism	Lipid Metabolism	3.1.1.23	Unigene16009_A0A	N	0	1000	0	2
R01354	ATP:propanoate adenyltransferase	[c] : C00013 + C05983 <==> C00002 + C00163	Propanoate metabolism	Carbohydrate Metabolism	6.2.1.1;6.2.1.17	Unigene45351_A0A	Y	-1000	1000	0	2
R01357	Acetoacetate:CoA ligase (AMP-forming)	[c] : C00002 + C00164 + C00010 <==> C00020 + C00013 + C00332	Butanoate metabolism	Carbohydrate Metabolism	6.2.1.16		N	0	1000	0	2
R01361	(R)-3-Hydroxybutanoate:NAD+ oxidoreductase	[c] : C01089 + C00003 <==> C00164 + C00004 + C00080	Synthesis and degradation of ketone bodies	Lipid Metabolism	1.1.1.30	( Unigene54408_A0A and Unigene4816_A0A and Unigene160_A0A and Unigene41101_A0A ) or ( Unigene27857_A0A )	Y	-1000	1000	0	2
R01364	4-fumarylacetoacetate fumarylhydrolase	[c] : C01061 + C00001 <==> C00164 + C00122	Tyrosine metabolism	Amino Acid Metabolism	3.7.1.2	Unigene373_A0A	N	0	1000	0	2
R01372	Phenylpyruvate:oxygen oxidoreductase (hydroxylating,decarboxylating)	[c] : C00166 + C00007 <==> C05852 + C00011	Phenylalanine metabolism	Amino Acid Metabolism	1.13.11.27		N	0	1000	0	2
R01378	Phenylpyruvate keto-enol-isomerase	[c] : C00166 <==> C02763	Phenylalanine metabolism	Amino Acid Metabolism	5.3.2.1	Unigene13081_A0A	Y	-1000	1000	0	2
R01383	UDPglucuronate beta-D-glucuronosyltransferase (acceptor-unspecific)	[c] : C00167 + C01335 <==> C00015 + C03033	Pentose and glucuronate interconversions	Carbohydrate Metabolism	2.4.1.17	( Unigene49795_A0A ) or ( Unigene49794_A0A and Unigene48897_A0A and Unigene14677_A0A and Unigene27751_A0A and Unigene44191_A0A and Unigene32852_A0A )	Y	-1000	1000	0	2
R01384	UDP-D-glucuronate carboxy-lyase (UDP-D-xylose-forming)	[c] : C00167 <==> C00190 + C00011	Starch and sucrose metabolism	Carbohydrate Metabolism	4.1.1.35	Unigene28718_A0A	N	0	1000	0	2
R01388	D-Glycerate:NAD+ 2-oxidoreductase	[c] : C00258 + C00003 <==> C00168 + C00004 + C00080	Glyoxylate and dicarboxylate metabolism	Carbohydrate Metabolism	1.1.1.26;1.1.1.29;1.1.1.81	( Unigene25077_A0A and Unigene50679_A0A )	Y	-1000	1000	0	2
R01392	D-Glycerate:NADP+ 2-oxidoreductase	[c] : C00258 + C00006 <==> C00168 + C00005 + C00080	Glyoxylate and dicarboxylate metabolism	Carbohydrate Metabolism	1.1.1.79;1.1.1.81	( Unigene25077_A0A and Unigene50679_A0A )	Y	-1000	1000	0	2
R01394	hydroxypyruvate aldose-ketose-isomerase	[c] : C00168 <==> C01146	Glyoxylate and dicarboxylate metabolism	Carbohydrate Metabolism	5.3.1.22	Unigene53967_A0A	N	0	1000	0	2
R01397	carbamoyl-phosphate:L-aspartate carbamoyltransferase	[c] : C00169 + C00049 <==> C00009 + C00438	Pyrimidine metabolism	Nucleotide Metabolism	2.1.3.2	( Unigene30387_A0A and Unigene6608_A0A and Unigene1630_A0A and Unigene46985_A0A and Unigene18455_A0A ) or ( Unigene34199_A0A and Unigene17517_A0A and Unigene15333_A0A and Unigene38421_A0A )	N	0	1000	0	2
R01402	S-methyl-5'-thioadenosine:phosphate S-methyl-5-thio-alpha-D-ribosyl-transferase	[c] : C00170 + C00009 <==> C00147 + C04188	Cysteine and methionine metabolism	Amino Acid Metabolism	2.4.2.28	Unigene55818_A0A	N	0	1000	0	2
R01415	5,6-Dihydrothymine:NADP+ oxidoreductase	[c] : C00906 + C00006 <==> C00178 + C00005 + C00080	Pyrimidine metabolism	Nucleotide Metabolism	1.3.1.2	( Unigene45570_A0A and Unigene26090_A0A and Unigene24970_A0A and Unigene9974_A0A and Unigene25528_A0A and Unigene18740_A0A and Unigene16757_A0A and Unigene32515_A0A )	Y	-1000	1000	0	2
R01421	Benzoyl phosphate phosphohydrolase	[c] : C06206 + C00001 <==> C00180 + C00009	Aminobenzoate degradation	Xenobiotics Biodegradation and Metabolism	3.6.1.7	Unigene43391_A0A	N	0	1000	0	2
R01426	formation of Benzoate	[c] : C00423 + 2 C00001 + C00003 <==> C00180 + C00033 + C00004 + C00080	Phenylalanine metabolism	Amino Acid Metabolism			N	0	1000	0	1
R01430	D-xylose:NADP+ 1-oxidoreductase	[c] : C00181 + C00006 <==> C02266 + C00005 + C00080	Pentose and glucuronate interconversions	Carbohydrate Metabolism	1.1.1.179	Unigene16653_A0A	N	0	1000	0	2
R01431	Xylitol:NADP+ oxidoreductase	[c] : C00379 + C00006 <==> C00181 + C00005 + C00080	Pentose and glucuronate interconversions	Carbohydrate Metabolism	1.1.1.21	( Unigene18863_A0A and Unigene26785_A0A and Unigene225_A0A and Unigene42171_A0A )	Y	-1000	1000	0	2
R01432	D-xylose aldose-ketose-isomerase	[c] : C00181 <==> C00310	Pentose and glucuronate interconversions	Carbohydrate Metabolism	5.3.1.5	Unigene7919_A0A	Y	-1000	1000	0	2
R01451	Cholesterol:NAD+ delta7-oxidoreductase	[c] : C01164 + C00004 + C00080 <==> C00187 + C00003	Steroid biosynthesis	Lipid Metabolism	1.3.1.21		N	0	1000	0	1
R01454	Cholesterol:oxygen oxidoreductase (side-chain-cleaving)	[c] : C00187 + C00007 + C00080 + 2 C00662 <==> C05500 + C00001 + 2 C00667	Steroid hormone biosynthesis	Lipid Metabolism	1.14.15.6	Unigene45215_A0A	N	0	1000	0	2
R01456	Cholesterol:NADP+ delta7-oxidoreductase	[c] : C01164 + C00005 + C00080 <==> C00187 + C00006	Steroid biosynthesis	Lipid Metabolism	1.3.1.21		N	0	1000	0	1
R01457	cholesterol:NADP+ Delta24-oxidoreductase	[c] : C00187 + C00006 <==> C01802 + C00080 + C00005	Steroid biosynthesis	Lipid Metabolism	1.3.1.72	( Unigene13969_A0A and Unigene16196_A0A and Unigene42624_A0A )	Y	-1000	1000	0	2
R01462	cholesterol ester acylhydrolase	[c] : C02530 + C00001 <==> C00187 + C00162	Steroid biosynthesis	Lipid Metabolism	3.1.1.13	( CL310.Contig1_A0A and Unigene15728_A0A and Unigene1571_A0A and Unigene41281_A0A and Unigene36843_A0A and Unigene12672_A0A ) or ( Unigene35593_A0A )	N	0	1000	0	2
R01468	ATP:ethanolamine O-phosphotransferase	[c] : C00002 + C00189 <==> C00008 + C00346	Glycerophospholipid metabolism	Lipid Metabolism	2.7.1.82	( Unigene20685_A0A and Unigene53121_A0A )	N	0	1000	0	2
R01470	sn-Glycero-3-phosphoethanolamine glycerophosphohydrolase	[c] : C01233 + C00001 <==> C00189 + C00093	Glycerophospholipid metabolism	Lipid Metabolism	3.1.4.2;3.1.4.46	Unigene11247_A0A	N	0	1000	0	2
R01478	beta-D-glucuronoside glucuronosohydrolase	[c] : C00001 + C03033 <==> C00191 + C00069	Pentose and glucuronate interconversions	Carbohydrate Metabolism	3.2.1.31	( Unigene385_A0A and Unigene53592_A0A ) or ( Unigene53593_A0A )	N	0	1000	0	2
R01481	L-Gulonate:NADP+ 6-oxidoreductase	[c] : C00191 + C00005 + C00080 <==> C00800 + C00006	Pentose and glucuronate interconversions	Carbohydrate Metabolism	1.1.1.19		Y	-1000	1000	0	1
R01483	D-Glucuronolactone lactonohydrolase	[c] : C00191 <==> C02670 + C00001	Ascorbate and aldarate metabolism	Carbohydrate Metabolism	3.1.1.19		Y	-1000	1000	0	1
R01494	N-Acylsphingosine amidohydrolase	[c] : C00195 + C00001 <==> C00162 + C00319	Sphingolipid metabolism	Lipid Metabolism	3.5.1.23	( CL141.Contig1_A0A and Unigene53511_A0A and Unigene39319_A0A and Unigene53136_A0A and Unigene40502_A0A )	N	0	1000	0	2
R01498	D-Glucosyl-N-acylsphingosine glucohydrolase	[c] : C01190 + C00001 <==> C00267 + C00195	Sphingolipid metabolism	Lipid Metabolism	3.2.1.45;3.2.1.62	( CL776.Contig1_A0A and Unigene36095_A0A and Unigene52890_A0A ) or ( Unigene54502_A0A and Unigene50843_A0A and Unigene4452_A0A )	N	0	1000	0	2
R01500	UDP-galactose:N-acylsphingosine D-galactosyltransferase	[c] : C00052 + C00195 <==> C00015 + C02686	Sphingolipid metabolism	Lipid Metabolism	2.4.1.47		N	0	1000	0	1
R01512	ATP:3-phospho-D-glycerate 1-phosphotransferase	[c] : C00002 + C00197 <==> C00008 + C00236	Glycolysis / Gluconeogenesis	Carbohydrate Metabolism	2.7.2.3	Unigene20292_A0A	Y	-1000	1000	0	2
R01513	3-Phospho-D-glycerate:NAD+ 2-oxidoreductase	[c] : C00197 + C00003 <==> C03232 + C00004 + C00080	Glycine, serine and threonine metabolism	Amino Acid Metabolism	1.1.1.95	( Unigene25077_A0A and Unigene19318_A0A and Unigene50679_A0A )	Y	-1000	1000	0	2
R01518	2-Phospho-D-glycerate 2,3-phosphomutase	[c] : C00631 <==> C00197	Glycolysis / Gluconeogenesis	Carbohydrate Metabolism	5.4.2.1	( Unigene19355_A0A and Unigene38675_A0A )	Y	-1000	1000	0	2
R01519	D-Glucono-1,5-lactone lactonohydrolase	[c] : C00198 + C00001 <==> C00257	Pentose phosphate pathway	Carbohydrate Metabolism	3.1.1.17	( Unigene45363_A0A and Unigene26891_A0A ) or ( Unigene56862_A0A )	N	0	1000	0	2
R01528	6-phospho-D-gluconate:NADP+ 2-oxidoreductase (decarboxylating)	[c] : C00345 + C00006 <==> C00199 + C00011 + C00005 + C00080	Pentose phosphate pathway	Carbohydrate Metabolism	1.1.1.44	( Unigene46405_A0A and Unigene50917_A0A )	N	0	1000	0	2
R01529	D-Ribulose-5-phosphate 3-epimerase	[c] : C00199 <==> C00231	Pentose phosphate pathway	Carbohydrate Metabolism	5.1.3.1	Unigene38819_A0A	Y	-1000	1000	0	2
R01547	ATP:dAMP phosphotransferase	[c] : C00002 + C00360 <==> C00008 + C00206	Purine metabolism	Nucleotide Metabolism	2.7.4.3;2.7.4.11	( Unigene8600_A0A and Unigene2847_A0A and Unigene34073_A0A )	Y	-1000	1000	0	2
R01548	dATP:cytidine 5'-phosphotransferase	[c] : C00131 + C00475 <==> C00206 + C00055	Pyrimidine metabolism	Nucleotide Metabolism	2.7.1.48	( Unigene1991_A0A and Unigene26015_A0A and Unigene11982_A0A )	N	0	1000	0	2
R01549	dATP:uridine 5'-phosphotransferase	[c] : C00131 + C00299 <==> C00206 + C00105	Pyrimidine metabolism	Nucleotide Metabolism	2.7.1.48	( Unigene1991_A0A and Unigene26015_A0A and Unigene11982_A0A )	N	0	1000	0	2
R01560	Adenosine aminohydrolase	[c] : C00212 + C00001 <==> C00294 + C00014	Purine metabolism	Nucleotide Metabolism	3.5.4.4	( Unigene51410_A0A and Unigene49593_A0A and Unigene45752_A0A and Unigene1964_A0A )	N	0	1000	0	2
R01561	Adenosine:phosphate alpha-D-ribosyltransferase	[c] : C00212 + C00009 <==> C00147 + C00620	Purine metabolism	Nucleotide Metabolism	2.4.2.1	Unigene20031_A0A	Y	-1000	1000	0	2
R01565	N,N-Dimethylglycine:acceptor oxidoreductase (demethylating)	[c] : C01026 + C00028 + C00001 <==> C00213 + C00067 + C00030	Glycine, serine and threonine metabolism	Amino Acid Metabolism	1.5.99.2	Unigene50191_A0A	N	0	1000	0	2
R01567	ATP:thymidine 5'-phosphotransferase	[c] : C00002 + C00214 <==> C00008 + C00364	Pyrimidine metabolism	Nucleotide Metabolism	2.7.1.21	( Unigene35626_A0A and Unigene33186_A0A )	N	0	1000	0	2
R01569	Thymidylate 5'-phosphohydrolase	[c] : C00364 + C00001 <==> C00214 + C00009	Pyrimidine metabolism	Nucleotide Metabolism	3.1.3.5;3.1.3.35	( Unigene49556_A0A and Unigene39746_A0A and Unigene11171_A0A and Unigene50486_A0A and Unigene24749_A0A and Unigene6641_A0A and Unigene38108_A0A and Unigene22160_A0A and Unigene43269_A0A )	N	0	1000	0	2
R01570	thymidine:phosphate deoxy-alpha-D-ribosyltransferase	[c] : C00214 + C00009 <==> C00178 + C00672	Pyrimidine metabolism	Nucleotide Metabolism	2.4.2.4	( Unigene19170_A0A ) or ( Unigene30369_A0A )	N	0	1000	0	2
R01590	Arachidonate:oxygen oxidoreductase	[c] : C00219 + 2 C00007 <==> C05956	Arachidonic acid metabolism	Lipid Metabolism	1.14.99.1	( Unigene48198_A0A and Unigene47903_A0A )	N	0	1000	0	2
R01593	Arachidonate:oxygen 15-oxidoreductase	[c] : C00219 + C00007 <==> C05966	Arachidonic acid metabolism	Lipid Metabolism	1.13.11.33		N	0	1000	0	1
R01595	Arachidonate:oxygen 5-oxidoreductase	[c] : C00219 + C00007 <==> C05356	Arachidonic acid metabolism	Lipid Metabolism	1.13.11.34	Unigene45097_A0A	N	0	1000	0	2
R01600	ATP:beta-D-glucose 6-phosphotransferase	[c] : C00002 + C00221 <==> C00008 + C01172	Glycolysis / Gluconeogenesis	Carbohydrate Metabolism	2.7.1.1;2.7.1.2	( Unigene55974_A0A and Unigene47170_A0A and Unigene33700_A0A and Unigene9255_A0A )	N	0	1000	0	2
R01602	D-Glucose 1-epimerase	[c] : C00267 <==> C00221	Glycolysis / Gluconeogenesis	Carbohydrate Metabolism	5.1.3.3	( Unigene33029_A0A and Unigene22534_A0A )	Y	-1000	1000	0	2
R01611	3-Oxopropanoate hydro-lyase	[c] : C00222 <==> C00804 + C00001	beta-Alanine metabolism	Metabolism of Other Amino Acids	4.2.1.27		Y	-1000	1000	0	1
R01616	4-Coumarate:CoA ligase (AMP-forming)	[c] : C00002 + C00811 + C00010 <==> C00020 + C00013 + C00223	Ubiquinone and other terpenoid-quinone biosynthesis	Metabolism of Cofactors and Vitamins	6.2.1.12	( Unigene31572_A0A and Unigene2607_A0A and Unigene30069_A0A and Unigene54439_A0A ) or ( Unigene52306_A0A and Unigene615_A0A )	N	0	1000	0	2
R01618	APS:ATP adenylyltransferase	[c] : C00224 + C00002 <==> C00059 + C01260	Purine metabolism	Nucleotide Metabolism	2.7.7.53		N	0	1000	0	1
R01624	acetyl-CoA:[acyl-carrier-protein] S-acetyltransferase	[c] : C00024 + C00229 <==> C00010 + C03939	Fatty acid biosynthesis	Lipid Metabolism	2.3.1.38;2.3.1.85;2.3.1.86;2.3.1.180	( Unigene19548_A0A and Unigene18727_A0A and Unigene8324_A0A and Unigene25439_A0A and Unigene50401_A0A )	N	0	1000	0	2
R01626	Malonyl-CoA:[acyl-carrier-protein] S-malonyltransferase	[c] : C00083 + C00229 <==> C00010 + C01209	Fatty acid biosynthesis	Lipid Metabolism	2.3.1.39;2.3.1.85;2.3.1.86	( ( Unigene19548_A0A and Unigene18727_A0A and Unigene8324_A0A and Unigene25439_A0A and Unigene50401_A0A ) or ( Unigene5379_A0A ) )	Y	-1000	1000	0	2
R01639	ATP:D-xylulose 5-phosphotransferase	[c] : C00002 + C00310 <==> C00008 + C00231	Pentose and glucuronate interconversions	Carbohydrate Metabolism	2.7.1.17	( Unigene17828_A0A and Unigene52340_A0A and Unigene10745_A0A and Unigene27256_A0A and Unigene5317_A0A and Unigene28904_A0A and Unigene47666_A0A and Unigene44145_A0A )	Y	-1000	1000	0	2
R01641	Sedoheptulose-7-phosphate:D-glyceraldehyde-3-phosphate glycolaldehyde transferase	[c] : C05382 + C00118 <==> C00117 + C00231	Pentose phosphate pathway	Carbohydrate Metabolism	2.2.1.1	Unigene20167_A0A	Y	-1000	1000	0	2
R01648	4-aminobutanoate:2-oxoglutarate aminotransferase	[c] : C00334 + C00026 <==> C00232 + C00025	Alanine, aspartate and glutamate metabolism	Amino Acid Metabolism	2.6.1.19	Unigene9554_A0A	Y	-1000	1000	0	2
R01658	Dimethylallyl-diphosphate:isopentenyl-diphosphate dimethylallyltranstransferase	[c] : C00235 + C00129 <==> C00013 + C00341	Terpenoid backbone biosynthesis	Metabolism of Terpenoids and Polyketides	2.5.1.1	( Unigene7920_A0A and Unigene48316_A0A and Unigene20892_A0A and Unigene6568_A0A and Unigene43114_A0A and Unigene35423_A0A and Unigene51312_A0A and Unigene11434_A0A and Unigene4811_A0A ) or ( CL1575.Contig1_A0A )	N	0	1000	0	2
R01663	dCMP aminohydrolase	[c] : C00239 + C00001 <==> C00365 + C00014	Pyrimidine metabolism	Nucleotide Metabolism	3.5.4.12	( Unigene40256_A0A and Unigene12630_A0A and Unigene31889_A0A and Unigene23952_A0A )	N	0	1000	0	2
R01664	2'-Deoxycytidine 5'-monophosphate phosphohydrolase	[c] : C00239 + C00001 <==> C00881 + C00009	Pyrimidine metabolism	Nucleotide Metabolism	3.1.3.5	( Unigene49556_A0A and Unigene39746_A0A and Unigene11171_A0A and Unigene50486_A0A and Unigene24749_A0A and Unigene6641_A0A and Unigene38108_A0A and Unigene22160_A0A and Unigene43269_A0A )	N	0	1000	0	2
R01665	ATP:dCMP phosphotransferase	[c] : C00002 + C00239 <==> C00008 + C00705	Pyrimidine metabolism	Nucleotide Metabolism	2.7.4.14	Unigene7801_A0A	N	0	1000	0	2
R01676	Guanine aminohydrolase	[c] : C00242 + C00001 <==> C00385 + C00014	Purine metabolism	Nucleotide Metabolism	3.5.4.3	Unigene32189_A0A	N	0	1000	0	2
R01678	Lactose galactohydrolase	[c] : C00243 + C00001 <==> C00267 + C00124	Galactose metabolism	Carbohydrate Metabolism	3.2.1.23;3.2.1.108	( Unigene34401_A0A and Unigene52557_A0A and Unigene42262_A0A ) or ( Unigene32446_A0A and Unigene3372_A0A )	N	0	1000	0	2
R01682	3-Sulfo-L-alanine carboxy-lyase (taurine-forming)	[c] : C00506 <==> C00245 + C00011	Taurine and hypotaurine metabolism	Metabolism of Other Amino Acids	4.1.1.15;4.1.1.29		N	0	1000	0	2
R01687	(5-L-glutamyl)-peptide:taurine 5-glutamyltransferase	[c] : C03193 + C00245 <==> C00012 + C05844	Taurine and hypotaurine metabolism	Metabolism of Other Amino Acids	2.3.2.2	( Unigene9404_A0A and Unigene45196_A0A )	N	0	1000	0	2
R01706	Oleoyl-[acyl-carrier protein] hydrolase	[c] : C05764 + C00001 <==> C00229 + C00249	Fatty acid biosynthesis	Lipid Metabolism	2.3.1.85;3.1.2.14	( Unigene19548_A0A and Unigene18727_A0A and Unigene8324_A0A and Unigene25439_A0A and Unigene50401_A0A )	N	0	1000	0	2
R01710	Pyridoxamine:oxygen oxidoreductase (deaminating)	[c] : C00534 + C00001 + C00007 <==> C00250 + C00014 + C00027	Vitamin B6 metabolism	Metabolism of Cofactors and Vitamins	1.4.3.5	Unigene44353_A0A	Y	-1000	1000	0	2
R01711	Pyridoxine:oxygen oxidoreductase (deaminating)	[c] : C00314 + C00007 <==> C00250 + C00027	Vitamin B6 metabolism	Metabolism of Cofactors and Vitamins	1.1.3.12;1.4.3.5	Unigene44353_A0A	Y	-1000	1000	0	2
R01724	Nicotinate D-ribonucleotide:diphosphate phosphoribosyltransferase	[c] : C01185 + C00013 <==> C00253 + C00119	Nicotinate and nicotinamide metabolism	Metabolism of Cofactors and Vitamins	2.4.2.11	( Unigene49309_A0A and Unigene46979_A0A and Unigene530_A0A and Unigene51844_A0A )	Y	-1000	1000	0	2
R01728	Prephenate:NAD+ oxidoreductase(decarboxylating)	[c] : C00254 + C00003 <==> C01179 + C00004 + C00080 + C00011	Tyrosine metabolism	Amino Acid Metabolism			Y	-1000	1000	0	2
R01736	(R)-S-Lactoylglutathione hydrolase	[c] : C03451 + C00001 <==> C00051 + C00256	Pyruvate metabolism	Carbohydrate Metabolism	3.1.2.6	( Unigene48763_A0A and Unigene21039_A0A and Unigene21038_A0A )	N	0	1000	0	2
R01737	ATP:D-Gluconate 6-phosphotransferase	[c] : C00002 + C00257 <==> C00008 + C00345	Pentose phosphate pathway	Carbohydrate Metabolism	2.7.1.12		N	0	1000	0	1
R01752	D-Glyceraldehyde:NAD+ oxidoreductase	[c] : C00577 + C00003 + C00001 <==> C00258 + C00004 + C00080	Glycerolipid metabolism	Lipid Metabolism	1.2.1.3	( Unigene45813_A0A and Unigene25877_A0A and Unigene25916_A0A and Unigene48344_A0A and Unigene2472_A0A and Unigene27550_A0A and Unigene12647_A0A and Unigene45632_A0A and Unigene30385_A0A and Unigene56244_A0A and Unigene1690_A0A and Unigene24755_A0A and Unigene13946_A0A and Unigene33389_A0A and Unigene22602_A0A ) or ( Unigene48345_A0A )	Y	-1000	1000	0	2
R01758	L-Arabitol:NAD+ 1-oxidoreductase	[c] : C00532 + C00003 <==> C00259 + C00004 + C00080	Pentose and glucuronate interconversions	Carbohydrate Metabolism	1.1.1.21	( Unigene18863_A0A and Unigene26785_A0A and Unigene225_A0A and Unigene42171_A0A )	Y	-1000	1000	0	2
R01759	L-Arabitol:NADP+ 1-oxidoreductase	[c] : C00532 + C00006 <==> C00259 + C00005 + C00080	Pentose and glucuronate interconversions	Carbohydrate Metabolism	1.1.1.21	( Unigene18863_A0A and Unigene26785_A0A and Unigene225_A0A and Unigene42171_A0A )	Y	-1000	1000	0	2
R01768	hypoxanthine:NAD+ oxidoreductase	[c] : C00262 + C00003 + C00001 <==> C00385 + C00004 + C00080	Purine metabolism	Nucleotide Metabolism	1.17.1.4	( Unigene45635_A0A and Unigene51485_A0A and Unigene26268_A0A and Unigene16943_A0A and Unigene52799_A0A and Unigene42362_A0A and Unigene30135_A0A )	N	0	1000	0	2
R01769	Hypoxanthine:oxygen oxidoreductase	[c] : C00262 + C00007 + C00001 <==> C00385 + C00027	Purine metabolism	Nucleotide Metabolism	1.17.3.2	( Unigene45635_A0A and Unigene51485_A0A and Unigene26268_A0A and Unigene16943_A0A and Unigene52799_A0A and Unigene42362_A0A and Unigene30135_A0A )	N	0	1000	0	2
R01786	ATP:alpha-D-glucose 6-phosphotransferase	[c] : C00002 + C00267 <==> C00008 + C00668	Glycolysis / Gluconeogenesis	Carbohydrate Metabolism	2.7.1.1;2.7.1.2	( Unigene55974_A0A and Unigene47170_A0A and Unigene33700_A0A and Unigene9255_A0A )	N	0	1000	0	2
R01787	D-Glucitol:NADP+ 1-oxidoreductase	[c] : C00794 + C00006 <==> C00267 + C00005 + C00080	Fructose and mannose metabolism	Carbohydrate Metabolism	1.1.1.21	( Unigene18863_A0A and Unigene26785_A0A and Unigene225_A0A and Unigene42171_A0A )	Y	-1000	1000	0	2
R01790	1,4-alpha-D-Glucan glucohydrolase	[c] : C00267 + C00369 <==> C00369 + C00001	Starch and sucrose metabolism	Carbohydrate Metabolism	3.2.1.3	( Unigene9371_A0A ) or ( Unigene42872_A0A and Unigene15323_A0A )	N	0	1000	0	2
R01791	Dextrin 6-alpha-D-glucanohydrolase	[c] : C00267 + C00721 <==> C00721 + C00001	Starch and sucrose metabolism	Carbohydrate Metabolism	3.2.1.3;3.2.1.10	( Unigene9371_A0A ) or ( Unigene42872_A0A and Unigene15323_A0A )	N	0	1000	0	2
R01793	5,6,7,8-tetrahydrobiopterin:NAD+ oxidoreductase	[c] : C00268 + C00004 + C00080 <==> C00272 + C00003	Folate biosynthesis	Metabolism of Cofactors and Vitamins	1.5.1.34	Unigene25692_A0A	Y	-1000	1000	0	2
R01794	5,6,7,8-tetrahydrobiopterin:NADP+ oxidoreductase	[c] : C00268 + C00005 + C00080 <==> C00272 + C00006	Folate biosynthesis	Metabolism of Cofactors and Vitamins	1.5.1.34	Unigene25692_A0A	Y	-1000	1000	0	2
R01795	L-Phenylalanine,tetrahydrobiopterin:oxygen oxidoreductase (4-hydroxylating)	[c] : C00272 + C00079 + C00007 <==> C00268 + C00082 + C00001	Phenylalanine metabolism	Amino Acid Metabolism	1.14.16.1		N	0	1000	0	2
R01799	CTP:phosphatidate cytidyltransferase	[c] : C00063 + C00416 <==> C00013 + C00269	Glycerophospholipid metabolism	Lipid Metabolism	2.7.7.41	( Unigene16161_A0A and Unigene3255_A0A )	N	0	1000	0	2
R01811	N-Acetylneuraminate pyruvate-lyase (N-acetyl-D-mannosamine-forming)	[c] : C00270 <==> C00645 + C00022	Amino sugar and nucleotide sugar metabolism	Carbohydrate Metabolism	4.1.3.3	( Unigene14377_A0A ) or ( Unigene24150_A0A )	N	0	1000	0	2
R01813	Tetrahydrobiopterin:NADP+ oxidoreductase	[c] : C04244 + C00005 + C00080 <==> C00272 + C00006	Folate biosynthesis	Metabolism of Cofactors and Vitamins	1.1.1.153	( Unigene6535_A0A and Unigene35960_A0A )	N	0	1000	0	2
R01814	L-Tryptophan,tetrahydrobiopterin:oxygen oxidoreductase (5-hydroxylating)	[c] : C00272 + C00078 + C00007 <==> C00643 + C00268 + C00001	Tryptophan metabolism	Amino Acid Metabolism	1.14.16.4	Unigene29018_A0A	N	0	1000	0	2
R01818	D-Mannose 6-phosphate 1,6-phosphomutase	[c] : C00275 <==> C00636	Fructose and mannose metabolism	Carbohydrate Metabolism	5.4.2.8	Unigene30954_A0A	Y	-1000	1000	0	2
R01819	D-mannose-6-phosphate aldose-ketose-isomerase	[c] : C00275 <==> C05345	Fructose and mannose metabolism	Carbohydrate Metabolism	5.3.1.8	Unigene50775_A0A	Y	-1000	1000	0	2
R01827	sedoheptulose-7-phosphate:D-glyceraldehyde-3-phosphate glyceronetransferase	[c] : C05382 + C00118 <==> C00279 + C05345	Pentose phosphate pathway	Carbohydrate Metabolism	2.2.1.2	Unigene7924_A0A	Y	-1000	1000	0	2
R01829	Sedoheptulose 1,7-bisphosphate D-glyceraldehyde-3-phosphate-lyase	[c] : C00111 + C00279 <==> C00447	Carbon fixation in photosynthetic organisms	Energy Metabolism	4.1.2.13	( Unigene19089_A0A and Unigene18845_A0A and Unigene19088_A0A )	N	0	1000	0	2
R01830	beta-D-Fructose 6-phosphate:D-glyceraldehyde-3-phosphate glycolaldehyde transferase	[c] : C05345 + C00118 <==> C00279 + C00231	Pentose phosphate pathway	Carbohydrate Metabolism	2.2.1.1	Unigene20167_A0A	Y	-1000	1000	0	2
R01836	Testosterone:NAD+ 17-oxidoreductase	[c] : C00535 + C00003 <==> C00280 + C00004 + C00080	Steroid hormone biosynthesis	Lipid Metabolism	1.1.1.51;1.1.1.63;1.1.1.239	( CL1335.Contig1_A0A and Unigene3717_A0A and Unigene4816_A0A and Unigene41101_A0A ) or ( Unigene3097_A0A and Unigene3098_A0A )	Y	-1000	1000	0	2
R01837	3beta-Hydroxyandrost-5-en-17-one:NAD+ 3-oxidoreductase/delta5-delta-4 isomerase	[c] : C01227 + C00003 <==> C00280 + C00004 + C00080	Steroid hormone biosynthesis	Lipid Metabolism	1.1.1.145;5.3.3.1		N	0	1000	0	1
R01838	Testosterone:NADP+ 17-oxidoreductase	[c] : C00535 + C00006 <==> C00280 + C00005 + C00080	Steroid hormone biosynthesis	Lipid Metabolism	1.1.1.51;1.1.1.64	Unigene46607_A0A	Y	-1000	1000	0	2
R01857	ATP:dGDP phosphotransferase	[c] : C00002 + C00361 <==> C00008 + C00286	Purine metabolism	Nucleotide Metabolism	2.7.4.6	( Unigene21044_A0A and Unigene16902_A0A and Unigene26862_A0A and Unigene43803_A0A and Unigene36433_A0A )	Y	-1000	1000	0	2
R01858	dGTP:pyruvate 2-O-phosphotransferase	[c] : C00361 + C00074 <==> C00286 + C00022	Purine metabolism	Nucleotide Metabolism	2.7.1.40	( Unigene19080_A0A and Unigene19081_A0A )	N	0	1000	0	2
R01859	Propanoyl-CoA:carbon-dioxide ligase (ADP-forming)	[c] : C00002 + C00100 + C00288 <==> C00008 + C00009 + C00683	Valine, leucine and isoleucine degradation	Amino Acid Metabolism	6.4.1.3	( Unigene45420_A0A and Unigene11446_A0A and Unigene22975_A0A and Unigene32726_A0A )	N	0	1000	0	2
R01863	inosine:phosphate alpha-D-ribosyltransferase	[c] : C00294 + C00009 <==> C00262 + C00620	Purine metabolism	Nucleotide Metabolism	2.4.2.1;2.4.2.15	Unigene20031_A0A	Y	-1000	1000	0	2
R01868	(S)-dihydroorotate:quinone oxidoreductase	[c] : C00337 + C15602 <==> C00295 + C15603	Pyrimidine metabolism	Nucleotide Metabolism	1.3.5.2	Unigene30749_A0A	Y	-1000	1000	0	2
R01880	dGTP:uridine 5'-phosphotransferase	[c] : C00286 + C00299 <==> C00361 + C00105	Pyrimidine metabolism	Nucleotide Metabolism	2.7.1.48	( Unigene1991_A0A and Unigene26015_A0A and Unigene11982_A0A )	N	0	1000	0	2
R01881	ATP:creatine N-phosphotransferase	[c] : C00002 + C00300 <==> C00008 + C02305	Arginine and proline metabolism	Amino Acid Metabolism	2.7.3.2	( Unigene19602_A0A and Unigene46263_A0A and Unigene13601_A0A and Unigene13645_A0A and Unigene50647_A0A and Unigene31583_A0A and Unigene55602_A0A )	N	0	1000	0	2
R01890	CTP:choline-phosphate cytidylyltransferase	[c] : C00063 + C00588 <==> C00013 + C00307	Glycerophospholipid metabolism	Lipid Metabolism	2.7.7.15	Unigene26199_A0A	N	0	1000	0	2
R01899	Isocitrate:NADP+ oxidoreductase	[c] : C00311 + C00006 <==> C05379 + C00005 + C00080	Citrate cycle (TCA cycle)	Carbohydrate Metabolism	1.1.1.42	( Unigene20751_A0A and Unigene20752_A0A and Unigene20754_A0A and CL1622.Contig1_A0A )	Y	-1000	1000	0	2
R01900	isocitrate hydro-lyase (cis-aconitate-forming)	[c] : C00417 + C00001 <==> C00311	Citrate cycle (TCA cycle)	Carbohydrate Metabolism	4.2.1.3	( Unigene3134_A0A and Unigene24740_A0A and CL359.Contig1_A0A and Unigene8315_A0A and Unigene16333_A0A and Unigene13696_A0A and Unigene32142_A0A )	Y	-1000	1000	0	2
R01911	pyridoxine-5'-phosphate phosphohydrolase	[c] : C00627 + C00001 <==> C00314 + C00009	Vitamin B6 metabolism	Metabolism of Cofactors and Vitamins	3.1.3.74	Unigene34035_A0A	N	0	1000	0	2
R01920	S-adenosylmethioninamine:putrescine 3-aminopropyltransferase	[c] : C01137 + C00134 <==> C00170 + C00315	Cysteine and methionine metabolism	Amino Acid Metabolism	2.5.1.16	Unigene43513_A0A	N	0	1000	0	2
R01923	Palmitoyl-CoA:L-carnitine O-palmitoyltransferase	[c] : C00154 + C00318 <==> C00010 + C02990	Fatty acid metabolism	Lipid Metabolism	2.3.1.21	( Unigene26022_A0A and Unigene26941_A0A and Unigene3276_A0A and Unigene52047_A0A and Unigene3679_A0A and Unigene3686_A0A and Unigene36164_A0A and Unigene56538_A0A and Unigene5129_A0A ) or ( Unigene21700_A0A )	Y	-1000	1000	0	2
R01926	ATP:sphingosine 1-phosphotransferase;sphingosine kinase	[c] : C00319 + C00002 <==> C06124 + C00008	Sphingolipid metabolism	Lipid Metabolism	2.7.1.91	( Unigene23804_A0A and Unigene18065_A0A )	N	0	1000	0	2
R01933	2-oxoadipate dehydrogenase complex	[c] : C00322 + C00010 + C00003 <==> C00527 + C00011 + C00004 + C00080	Tryptophan metabolism	Amino Acid Metabolism	1.2.4.2;1.8.1.4;2.3.1.61	( Unigene9169_A0A and Unigene8310_A0A )	N	0	1000	0	2
R01939	L-2-aminoadipate:2-oxoglutarate aminotransferase	[c] : C00956 + C00026 <==> C00322 + C00025	Lysine biosynthesis	Amino Acid Metabolism	2.6.1.39	( Unigene5663_A0A and Unigene27712_A0A and Unigene16103_A0A )	Y	-1000	1000	0	2
R01940	2-Oxoadipate:lipoamde 2-oxidoreductase(decarboxylating and acceptor-succinylating)	[c] : C00322 + C15972 <==> C06157 + C00011	Lysine degradation	Amino Acid Metabolism	1.2.4.2	( Unigene9169_A0A and Unigene8310_A0A )	N	0	1000	0	2
R01942	S-Adenosyl-L-methionine:caffeoyl-CoA 3-O-methyltransferase	[c] : C00019 + C00323 <==> C00021 + C00406	Phenylalanine metabolism	Amino Acid Metabolism	2.1.1.104		N	0	1000	0	1
R01943	Caffeate:CoA ligase (AMP-forming);3,4-Dihydroxy-trans-cinnamate:CoA ligase (AMP-forming)	[c] : C00002 + C01197 + C00010 <==> C00020 + C00013 + C00323	Phenylpropanoid biosynthesis	Biosynthesis of Other Secondary Metabolites	6.2.1.12	( Unigene31572_A0A and Unigene2607_A0A and Unigene30069_A0A and Unigene54439_A0A ) or ( Unigene52306_A0A and Unigene615_A0A )	N	0	1000	0	2
R01951	GTP:beta-L-fucose-1-phosphate guanylyltransferase	[c] : C00013 + C00325 <==> C00044 + C02985	Fructose and mannose metabolism	Carbohydrate Metabolism	2.7.7.30		Y	-1000	1000	0	1
R01954	L-Citrulline:L-aspartate ligase (AMP-forming)	[c] : C00002 + C00327 + C00049 <==> C00020 + C00013 + C03406	Alanine, aspartate and glutamate metabolism	Amino Acid Metabolism	6.3.4.5	( Unigene45925_A0A and Unigene26566_A0A and Unigene39530_A0A ) or ( Unigene38726_A0A )	N	0	1000	0	2
R01956	L-Kynurenine:2-oxoglutarate aminotransferase	[c] : C00328 + C00026 <==> C01252 + C00025	Tryptophan metabolism	Amino Acid Metabolism	2.6.1.7	( Unigene13559_A0A and Unigene5663_A0A and Unigene27712_A0A and Unigene16103_A0A )	N	0	1000	0	2
R01959	N-Formyl-L-kynurenine amidohydrolase	[c] : C02700 + C00001 <==> C00058 + C00328	Tryptophan metabolism	Amino Acid Metabolism	3.5.1.9		N	0	1000	0	1
R01960	L-Kynurenine,NADPH:oxygen oxidoreductase (3-hydroxylating)	[c] : C00328 + C00007 + C00005 + C00080 <==> C03227 + C00006 + C00001	Tryptophan metabolism	Amino Acid Metabolism	1.14.13.9	Unigene21549_A0A	N	0	1000	0	2
R01961	ATP:D-glucosamine 6-phosphotransferase	[c] : C00002 + C00329 <==> C00008 + C00352	Amino sugar and nucleotide sugar metabolism	Carbohydrate Metabolism	2.7.1.1;2.7.1.8	( Unigene55974_A0A and Unigene47170_A0A and Unigene33700_A0A and Unigene9255_A0A )	Y	-1000	1000	0	2
R01968	2'-Deoxyguanosine 5'-monophosphate phosphohydrolase	[c] : C00362 + C00001 <==> C00330 + C00009	Purine metabolism	Nucleotide Metabolism	3.1.3.5	( Unigene49556_A0A and Unigene39746_A0A and Unigene11171_A0A and Unigene50486_A0A and Unigene24749_A0A and Unigene6641_A0A and Unigene38108_A0A and Unigene22160_A0A and Unigene43269_A0A )	Y	-1000	1000	0	2
R01969	Deoxyguanosine:orthophosphate ribosyltransferase	[c] : C00330 + C00009 <==> C00242 + C00672	Purine metabolism	Nucleotide Metabolism	2.4.2.1;2.4.2.4	Unigene20031_A0A	Y	-1000	1000	0	2
R01975	(S)-3-Hydroxybutanoyl-CoA:NAD+ oxidoreductase	[c] : C01144 + C00003 <==> C00332 + C00004 + C00080	Fatty acid metabolism	Lipid Metabolism	1.1.1.35	Unigene8033_A0A	Y	-1000	1000	0	2
R01986	4-Aminobutyraldehyde:NAD+ oxidoreductase	[c] : C00555 + C00006 + C00001 <==> C00334 + C00005 + C00080	Arginine and proline metabolism	Amino Acid Metabolism	1.2.1.3	( Unigene45813_A0A and Unigene25877_A0A and Unigene25916_A0A and Unigene48344_A0A and Unigene2472_A0A and Unigene27550_A0A and Unigene12647_A0A and Unigene45632_A0A and Unigene30385_A0A and Unigene56244_A0A and Unigene1690_A0A and Unigene24755_A0A and Unigene13946_A0A and Unigene33389_A0A and Unigene22602_A0A ) or ( Unigene48345_A0A )	N	0	1000	0	2
R01987	4-acetamidobutanoate amidohydrolase	[c] : C02946 + C00001 <==> C00334 + C00033	Arginine and proline metabolism	Amino Acid Metabolism	3.5.1.63		N	0	1000	0	1
R01989	L-Arginine:4-aminobutanoate amidinotransferase	[c] : C00062 + C00334 <==> C00077 + C01035	Arginine and proline metabolism	Amino Acid Metabolism	2.1.4.1		N	0	1000	0	1
R01990	4-Guanidinobutanoate amidinohydrolase	[c] : C01035 + C00001 <==> C00334 + C00086	Arginine and proline metabolism	Amino Acid Metabolism	3.5.3.7		Y	-1000	1000	0	1
R01993	(S)-dihydroorotate amidohydrolase	[c] : C00337 + C00001 <==> C00438	Pyrimidine metabolism	Nucleotide Metabolism	3.5.2.3	( Unigene30387_A0A and Unigene6608_A0A and Unigene1630_A0A and Unigene46985_A0A and Unigene18455_A0A ) or ( Unigene34199_A0A and Unigene17517_A0A and Unigene15333_A0A and Unigene38421_A0A )	Y	-1000	1000	0	2
R02003	Geranyl-diphosphate:isopentenyl-diphosphate geranyltrans-transferase	[c] : C00341 + C00129 <==> C00013 + C00448	Terpenoid backbone biosynthesis	Metabolism of Terpenoids and Polyketides	2.5.1.10	( Unigene7920_A0A and Unigene48316_A0A and Unigene20892_A0A and Unigene6568_A0A and Unigene43114_A0A and Unigene35423_A0A and Unigene51312_A0A and Unigene11434_A0A and Unigene4811_A0A ) or ( CL1575.Contig1_A0A )	N	0	1000	0	2
R02016	NADPH:oxidized-thioredoxin oxidoreductase	[c] : C00343 + C00005 + C00080 <==> C00342 + C00006	Pyrimidine metabolism	Nucleotide Metabolism	1.8.1.9	( Unigene30625_A0A and Unigene13908_A0A and Unigene15237_A0A )	N	0	1000	0	2
R02018	2'-Deoxyuridine 5'-diphosphate:oxidized-thioredoxin 2'-oxidoreductase	[c] : C00342 + C00015 <==> C01346 + C00343 + C00001	Pyrimidine metabolism	Nucleotide Metabolism	1.17.4.1		N	0	1000	0	1
R02021	adenosine 3',5'-bisphosphate,sulfite:oxidized-thioredoxin oxidoreductase (3'-phosphoadenosine-5'-phosphosulfate -forming)	[c] : C00342 + C00053 <==> C00343 + C00094 + C00054	Sulfur metabolism	Energy Metabolism	1.8.4.8		N	0	1000	0	1
R02022	2'-Deoxyuridine 5'-triphosphate:oxydized-thioredoxin 2'-oxidoreductase	[c] : C00063 + C00342 <==> C00458 + C00343 + C00001	Pyrimidine metabolism	Nucleotide Metabolism	1.17.4.2		N	0	1000	0	1
R02024	2'-Deoxycytidine diphosphate:oxidized-thioredoxin 2'-oxidoreductase	[c] : C00342 + C00112 <==> C00705 + C00343 + C00001	Pyrimidine metabolism	Nucleotide Metabolism	1.17.4.1	( Unigene27092_A0A and Unigene37508_A0A and Unigene1131_A0A )	N	0	1000	0	1
R02027	Phosphatidylglycerol cholinephosphohydrolase	[c] : C00344 + C00001 <==> C00641 + C00093	Glycerophospholipid metabolism	Lipid Metabolism	3.1.4.3		N	0	1000	0	1
R02030	CDP-diacylglycerol:phosphatidylglycerol 3-phosphatidyltransferase	[c] : C00344 + C00269 <==> C05980 + C00055	Glycerophospholipid metabolism	Lipid Metabolism	2.7.8.-	Unigene32700_A0A	N	0	1000	0	2
R02035	6-Phospho-D-glucono-1,5-lactone lactonohydrolase	[c] : C01236 + C00001 <==> C00345	Pentose phosphate pathway	Carbohydrate Metabolism	3.1.1.31	Unigene53447_A0A	Y	-1000	1000	0	2
R02038	CTP:ethanolamine-phosphate cytidylyltransferase	[c] : C00063 + C00346 <==> C00013 + C00570	Glycerophospholipid metabolism	Lipid Metabolism	2.7.7.14	Unigene44510_A0A	N	0	1000	0	2
R02051	Phosphatidylethanolamine phosphatidohydrolase	[c] : C00350 + C00001 <==> C00189 + C00416	Glycerophospholipid metabolism	Lipid Metabolism	3.1.4.4	( Unigene46312_A0A and Unigene45440_A0A and Unigene28697_A0A and Unigene47010_A0A and Unigene42461_A0A and Unigene52456_A0A and Unigene23240_A0A and Unigene3728_A0A and Unigene31456_A0A )	N	0	1000	0	2
R02052	Phosphatidylethanolamine ethanolaminephosphohydrolase	[c] : C00350 + C00001 <==> C00641 + C00346	Glycerophospholipid metabolism	Lipid Metabolism	3.1.4.3		N	0	1000	0	1
R02053	Phosphatidylethanolamine 2-acylhydrolase	[c] : C00350 + C00001 <==> C04438 + C00162	Glycerophospholipid metabolism	Lipid Metabolism	3.1.1.4	( Unigene53786_A0A and Unigene13551_A0A and Unigene43493_A0A and Unigene35949_A0A and Unigene29770_A0A and Unigene33536_A0A and Unigene4234_A0A and Unigene45757_A0A and Unigene18772_A0A and Unigene14829_A0A and Unigene39126_A0A and Unigene53444_A0A and Unigene17160_A0A and Unigene27877_A0A )	N	0	1000	0	2
R02054	Phosphatidylethanolamine 1-acylhydrolase	[c] : C00350 + C00001 <==> C05973 + C00162	Glycerophospholipid metabolism	Lipid Metabolism	3.1.1.32		N	0	1000	0	1
R02057	CDPethanolamine:1,2-diacylglycerol ethanolaminephosphotransferase	[c] : C00570 + C00641 <==> C00055 + C00350	Glycerophospholipid metabolism	Lipid Metabolism	2.7.8.1	( Unigene53516_A0A and Unigene36020_A0A and Unigene38540_A0A )	N	0	1000	0	2
R02059	N-Acetyl-D-glucosamine-6-phosphate amidohydrolase	[c] : C00357 + C00001 <==> C00352 + C00033	Amino sugar and nucleotide sugar metabolism	Carbohydrate Metabolism	3.5.1.25	( Unigene12969_A0A and Unigene22909_A0A and Unigene44891_A0A and Unigene42489_A0A )	N	0	1000	0	2
R02078	L-Tyrosine,L-dopa:oxygen oxidoreductase	[c] : C00355 + C00082 + C00007 <==> C00822 + C00355 + C00001	Tyrosine metabolism	Amino Acid Metabolism	1.10.3.1;1.14.18.1	( CL492.Contig1_A0A and Unigene18850_A0A and Unigene18852_A0A and Unigene49439_A0A ) or ( Unigene20224_A0A and Unigene20899_A0A and Unigene19440_A0A and Unigene18681_A0A and Unigene18682_A0A )	N	0	1000	0	2
R02080	3,4-Dihydroxy-L-phenylalanine carboxy-lyase	[c] : C00355 <==> C03758 + C00011	Tyrosine metabolism	Amino Acid Metabolism	4.1.1.25;4.1.1.28		N	0	1000	0	2
R02082	(R)-Mevalonate:NADP+ oxidoreductase (CoA acylating)	[c] : C00356 + 2 C00005 + 2 C00080 <==> C00418 + C00010 + 2 C00006	Terpenoid backbone biosynthesis	Metabolism of Terpenoids and Polyketides	1.1.1.34	Unigene3605_A0A	N	0	1000	0	2
R02085	(S)-3-Hydroxy-3-methylglutaryl-CoA hydro-lyase (trans-3-methylglutaconyl-CoA-forming)	[c] : C00356 <==> C03231 + C00001	Valine, leucine and isoleucine degradation	Amino Acid Metabolism	4.2.1.18	( Unigene53580_A0A and Unigene43034_A0A and Unigene9931_A0A and Unigene33956_A0A )	Y	-1000	1000	0	2
R02088	2'-Deoxyadenosine 5'-monophosphate phosphohydrolase	[c] : C00360 + C00001 <==> C00559 + C00009	Purine metabolism	Nucleotide Metabolism	3.1.3.5	( Unigene49556_A0A and Unigene39746_A0A and Unigene11171_A0A and Unigene50486_A0A and Unigene24749_A0A and Unigene6641_A0A and Unigene38108_A0A and Unigene22160_A0A and Unigene43269_A0A )	Y	-1000	1000	0	2
R02090	ATP:dGMP phosphotransferase	[c] : C00002 + C00362 <==> C00008 + C00361	Purine metabolism	Nucleotide Metabolism	2.7.4.8;2.7.4.12	( Unigene48248_A0A and Unigene45938_A0A and Unigene31671_A0A and Unigene39921_A0A and Unigene19611_A0A and Unigene52014_A0A )	Y	-1000	1000	0	2
R02091	dGTP:cytidine 5'-phosphotransferase	[c] : C00286 + C00475 <==> C00361 + C00055	Pyrimidine metabolism	Nucleotide Metabolism	2.7.1.48	( Unigene1991_A0A and Unigene26015_A0A and Unigene11982_A0A )	N	0	1000	0	2
R02092	dTDP phosphohydrolase	[c] : C00363 + C00001 <==> C00364 + C00009	Pyrimidine metabolism	Nucleotide Metabolism	3.6.1.5	Unigene33812_A0A	N	0	1000	0	2
R02093	ATP:dTDP phosphotransferase	[c] : C00002 + C00363 <==> C00008 + C00459	Pyrimidine metabolism	Nucleotide Metabolism	2.7.4.6	( Unigene21044_A0A and Unigene16902_A0A and Unigene26862_A0A and Unigene43803_A0A and Unigene36433_A0A )	Y	-1000	1000	0	2
R02094	ATP:dTMP phosphotransferase	[c] : C00002 + C00364 <==> C00008 + C00363	Pyrimidine metabolism	Nucleotide Metabolism	2.7.4.9;2.7.4.12	Unigene10161_A0A	Y	-1000	1000	0	2
R02095	dTTP nucleotidohydrolase	[c] : C00459 + C00001 <==> C00363 + C00009	Pyrimidine metabolism	Nucleotide Metabolism	3.6.1.5;3.6.1.39	Unigene33812_A0A	N	0	1000	0	2
R02096	dTTP:cytidine 5'-phosphotransferase	[c] : C00459 + C00475 <==> C00363 + C00055	Pyrimidine metabolism	Nucleotide Metabolism	2.7.1.48	( Unigene1991_A0A and Unigene26015_A0A and Unigene11982_A0A )	N	0	1000	0	2
R02097	dTTP:uridine 5'-phosphotransferase	[c] : C00459 + C00299 <==> C00363 + C00105	Pyrimidine metabolism	Nucleotide Metabolism	2.7.1.48	( Unigene1991_A0A and Unigene26015_A0A and Unigene11982_A0A )	N	0	1000	0	2
R02098	ATP:dUMP phosphotransferase	[c] : C00002 + C00365 <==> C00008 + C01346	Pyrimidine metabolism	Nucleotide Metabolism	2.7.4.4;2.7.4.9	Unigene10161_A0A	Y	-1000	1000	0	2
R02099	ATP:deoxyuridine 5'-phosphotransferase	[c] : C00002 + C00526 <==> C00008 + C00365	Pyrimidine metabolism	Nucleotide Metabolism	2.7.1.21	( Unigene35626_A0A and Unigene33186_A0A )	N	0	1000	0	2
R02100	dUTP nucleotidohydrolase	[c] : C00460 + C00001 <==> C00365 + C00013	Pyrimidine metabolism	Nucleotide Metabolism	3.6.1.19;3.6.1.23	( Unigene34221_A0A ) or ( Unigene28480_A0A )	N	0	1000	0	2
R02101	5,10-Methylenetetrahydrofolate:dUMP C-methyltransferase	[c] : C00365 + C00143 <==> C00415 + C00364	Pyrimidine metabolism	Nucleotide Metabolism	2.1.1.45		N	0	1000	0	1
R02103	xanthine:NAD+ oxidoreductase	[c] : C00385 + C00003 + C00001 <==> C00366 + C00004 + C00080	Purine metabolism	Nucleotide Metabolism	1.17.1.4	( Unigene45635_A0A and Unigene51485_A0A and Unigene26268_A0A and Unigene16943_A0A and Unigene52799_A0A and Unigene42362_A0A and Unigene30135_A0A )	N	0	1000	0	2
R02106	Urate:oxygen oxidoreductase	[c] : C00366 + C00007 + C00001 <==> C11821 + C00027	Purine metabolism	Nucleotide Metabolism	1.7.3.3	Unigene27799_A0A	N	0	1000	0	2
R02107	Xanthine:oxygen oxidoreductase	[c] : C00385 + C00001 + C00007 <==> C00366 + C00027	Purine metabolism	Nucleotide Metabolism	1.17.3.2	( Unigene45635_A0A and Unigene51485_A0A and Unigene26268_A0A and Unigene16943_A0A and Unigene52799_A0A and Unigene42362_A0A and Unigene30135_A0A )	N	0	1000	0	2
R02108	1,4-alpha-D-Glucan glucanohydrolase	[c] : C00721 + C00369 <==> C00369 + C00001	Starch and sucrose metabolism	Carbohydrate Metabolism	3.2.1.1	( Unigene19881_A0A and Unigene20871_A0A and Unigene48626_A0A and Unigene54728_A0A and Unigene22065_A0A ) or ( Unigene36723_A0A )	N	0	1000	0	2
R02109	Dextrin 6-alpha-D-glucanohydrolase	[c] : C00369 + C00001 <==> C00718 + C00267	Starch and sucrose metabolism	Carbohydrate Metabolism	3.2.1.33	( Unigene20223_A0A and Unigene20869_A0A )	Y	-1000	1000	0	2
R02110	1,4-alpha-D-Glucan:1,4-alpha-D-glucan 6-alpha-D-(1,4-alpha-D-glucano)-transferase	[c] : C00718 <==> C00369	Starch and sucrose metabolism	Carbohydrate Metabolism	2.4.1.18	( Unigene55627_A0A and Unigene55390_A0A and Unigene22756_A0A and Unigene11070_A0A and Unigene6786_A0A and Unigene44595_A0A )	N	0	1000	0	2
R02111	1,4-alpha-D-Glucan:orthophosphate alpha-D-glucosyltransferase	[c] : C00369 + C00009 <==> C00718 + C00103	Starch and sucrose metabolism	Carbohydrate Metabolism	2.4.1.1	( Unigene19292_A0A and Unigene20615_A0A )	N	0	1000	0	2
R02114	Phosphatidylcholine:sterol O-acyltransferase	[c] : C00157 + C00370 <==> C04230 + C01958	Glycerophospholipid metabolism	Lipid Metabolism	2.3.1.43	Unigene4903_A0A	N	0	1000	0	2
R02123	retinal:NAD+ oxidoreductase	[c] : C00376 + C00003 + C00001 <==> C00777 + C00004 + C00080	Retinol metabolism	Metabolism of Cofactors and Vitamins	1.2.1.36	Unigene25916_A0A	N	0	1000	0	2
R02124	retinol:NAD+ oxidoreductase	[c] : C00473 + C00003 <==> C00376 + C00004 + C00080	Retinol metabolism	Metabolism of Cofactors and Vitamins	1.1.1.1;1.1.1.105	( Unigene20718_A0A ) or ( Unigene49428_A0A )	Y	-1000	1000	0	2
R02142	XMP:pyrophosphate phosphoribosyltransferase	[c] : C00385 + C00119 <==> C00655 + C00013	Purine metabolism	Nucleotide Metabolism	2.4.2.8;2.4.2.22	Unigene5009_A0A	Y	-1000	1000	0	2
R02147	guanosine:phosphate alpha-D-ribosyltransferase	[c] : C00387 + C00009 <==> C00242 + C00620	Purine metabolism	Nucleotide Metabolism	2.4.2.1;2.4.2.15	Unigene20031_A0A	Y	-1000	1000	0	2
R02150	1H-Imidazole-4-ethanamine:oxygen oxidoreductase (deaminating) (copper-containing)	[c] : C00388 + C00007 + C00001 <==> C05130 + C00014 + C00027	Histidine metabolism	Amino Acid Metabolism	1.4.3.22		N	0	1000	0	1
R02164	Succinate:ubiquinone oxidoreductase	[c] : C00399 + C00042 <==> C00390 + C00122	Citrate cycle (TCA cycle)	Carbohydrate Metabolism	1.3.5.1	( Unigene8604_A0A and Unigene48087_A0A and Unigene49796_A0A and Unigene30941_A0A ) or ( Unigene7947_A0A and CL1252.Contig1_A0A )	Y	-1000	1000	0	2
R02173	Tryptamine:oxygen oxidoreductase(deaminating)	[c] : C00398 + C00001 + C00007 <==> C00637 + C00014 + C00027	Tryptophan metabolism	Amino Acid Metabolism	1.4.3.4;1.4.3.22		N	0	1000	0	1
R02175	S-adenosyl-L-methionine:2-hexaprenyl-3-methyl-5-hydroxy-6-methoxy-1,4-benzoquinone 3-O-methyltransferase	[c] : C05805 + C00019 <==> C17568 + C00021	Ubiquinone and other terpenoid-quinone biosynthesis	Metabolism of Cofactors and Vitamins	2.1.1.114	( Unigene16058_A0A and Unigene22287_A0A )	N	0	1000	0	2
R02180	3'-Phosphoadenylylsulfate:chondroitin 4'-sulfotransferase	[c] : C00053 + C00401 <==> C00054 + C00634	Sulfur metabolism	Energy Metabolism	2.8.2.5	( Unigene7194_A0A and Unigene560_A0A and Unigene6935_A0A and Unigene6935_A0A and Unigene21275_A0A and Unigene10024_A0A )	N	0	1000	0	2
R02194	Ferulate:CoA ligase (AMP-forming)	[c] : C00002 + C01494 + C00010 <==> C00020 + C00013 + C00406	Phenylpropanoid biosynthesis	Biosynthesis of Other Secondary Metabolites	6.2.1.12	( Unigene31572_A0A and Unigene2607_A0A and Unigene30069_A0A and Unigene54439_A0A ) or ( Unigene52306_A0A and Unigene615_A0A )	N	0	1000	0	2
R02199	L-Isoleucine:2-oxoglutarate aminotransferase	[c] : C00407 + C00026 <==> C00671 + C00025	Valine, leucine and isoleucine degradation	Amino Acid Metabolism	2.6.1.42	( Unigene7568_A0A ) or ( Unigene32633_A0A )	N	0	1000	0	2
R02221	Sinapate:CoA ligase (AMP-forming)	[c] : C00002 + C00482 + C00010 <==> C00020 + C00013 + C00411	Phenylpropanoid biosynthesis	Biosynthesis of Other Secondary Metabolites	6.2.1.12	( Unigene31572_A0A and Unigene2607_A0A and Unigene30069_A0A and Unigene54439_A0A ) or ( Unigene52306_A0A and Unigene615_A0A )	N	0	1000	0	2
R02222	steroyl-CoA,hydrogen-donor:oxygen oxidoreductase	[c] : C00412 + 2 C00999 + C00007 + 2 C00080 <==> C00510 + 2 C00996 + 2 C00001	Biosynthesis of unsaturated fatty acids	Lipid Metabolism	1.14.19.1	Unigene20730_A0A	N	0	1000	0	2
R02237	7,8-dihydropteroate:L-glutamate ligase (ADP-forming)	[c] : C00002 + C00921 + C00025 <==> C00008 + C00009 + C00415	Folate biosynthesis	Metabolism of Cofactors and Vitamins	6.3.2.12;6.3.2.17	( Unigene54119_A0A and CL1625.Contig1_A0A and Unigene10764_A0A and Unigene51625_A0A and Unigene14395_A0A )	N	0	1000	0	2
R02239	1,2-Diacyl-sn-glycerol 3-phosphate phosphohydrolase	[c] : C00416 + C00001 <==> C00641 + C00009	Glycerolipid metabolism	Lipid Metabolism	3.1.3.4	( Unigene4984_A0A and Unigene40967_A0A and Unigene39158_A0A and Unigene51808_A0A and Unigene49912_A0A ) or ( Unigene21841_A0A and Unigene49913_A0A )	N	0	1000	0	2
R02240	ATP:1,2-diacylglycerol 3-phosphotransferase	[c] : C00002 + C00641 <==> C00008 + C00416	Glycerolipid metabolism	Lipid Metabolism	2.7.1.107	( Unigene41755_A0A and Unigene8442_A0A and Unigene7719_A0A ) or ( Unigene42157_A0A )	N	0	1000	0	2
R02241	acyl-CoA:1-acyl-sn-glycerol-3-phosphate 2-O-acyltransferase	[c] : C00681 + C00040 <==> C00416 + C00010	Glycerolipid metabolism	Lipid Metabolism	2.3.1.51	( Unigene7212_A0A and Unigene10063_A0A and Unigene35936_A0A and Unigene26459_A0A and Unigene52235_A0A and Unigene30242_A0A and Unigene27595_A0A and Unigene43875_A0A and Unigene48499_A0A ) or ( Unigene48500_A0A )	N	0	1000	0	2
R02245	ATP:(R)-mevalonate 5-phosphotransferase	[c] : C00002 + C00418 <==> C00008 + C01107	Terpenoid backbone biosynthesis	Metabolism of Terpenoids and Polyketides	2.7.1.36	Unigene18595_A0A	N	0	1000	0	2
R02250	Triacylglycerol acylhydrolase	[c] : C00422 + C00001 <==> C00641 + C00162	Glycerolipid metabolism	Lipid Metabolism	3.1.1.3	( Unigene20446_A0A and CL310.Contig1_A0A and Unigene15728_A0A and Unigene1571_A0A and Unigene41281_A0A and Unigene12183_A0A and CL1373.Contig1_A0A and Unigene12672_A0A and Unigene26991_A0A and Unigene24605_A0A ) or ( Unigene35593_A0A )	N	0	1000	0	2
R02251	acyl-CoA:1,2-diacyl-sn-glycerol O-acyltransferase	[c] : C00641 + C00040 <==> C00422 + C00010	Glycerolipid metabolism	Lipid Metabolism	2.3.1.20	( Unigene12092_A0A ) or ( Unigene26599_A0A and Unigene21893_A0A )	N	0	1000	0	2
R02253	trans-cinnamate,NADPH:oxygen oxidoreductase (4-hydroxylating)	[c] : C00423 + C00007 + C00005 + C00080 <==> C00811 + C00006 + C00001	Phenylalanine metabolism	Amino Acid Metabolism	1.14.13.11		N	0	1000	0	1
R02255	trans-Cinnamate:CoA ligase (AMP-forming)	[c] : C00002 + C00423 + C00010 <==> C00020 + C00013 + C00540	Phenylpropanoid biosynthesis	Biosynthesis of Other Secondary Metabolites	6.2.1.12	( Unigene31572_A0A and Unigene2607_A0A and Unigene30069_A0A and Unigene54439_A0A ) or ( Unigene52306_A0A and Unigene615_A0A )	N	0	1000	0	2
R02264	formation of Prostaglandin F2alpha	[c] : C00427 + C00030 <==> C00639 + C00028	Arachidonic acid metabolism	Lipid Metabolism			N	0	1000	0	1
R02265	(5Z,13E)-(15S)-9alpha,11alpha-Epidioxy-15-hydroxyprosta-5,13- dienoate E-isomerase	[c] : C00427 <==> C00584	Arachidonic acid metabolism	Lipid Metabolism	5.3.99.3	( Unigene52551_A0A and Unigene35497_A0A and Unigene39358_A0A )	N	0	1000	0	2
R02266	(5Z,13E)-(15S)-9alpha,11alpha-Epidioxy-15-hydroxyprosta-5,13- dienoate D-isomerase	[c] : C00427 <==> C00696	Arachidonic acid metabolism	Lipid Metabolism	5.3.99.2	( Unigene20230_A0A and Unigene2892_A0A and Unigene54040_A0A )	N	0	1000	0	2
R02269	5,6-Dihydrouracil amidohydrolase	[c] : C00429 + C00001 <==> C02642	Pyrimidine metabolism	Nucleotide Metabolism	3.5.2.2	( Unigene49762_A0A and Unigene22851_A0A )	Y	-1000	1000	0	2
R02294	N-Ribosylnicotinamide:orthophosphate ribosyltransferase	[c] : C03150 + C00009 <==> C00153 + C00620	Nicotinate and nicotinamide metabolism	Metabolism of Cofactors and Vitamins	2.4.2.1	Unigene20031_A0A	Y	-1000	1000	0	2
R02295	Nicotinate D-ribonucleoside:orthophosphate ribosyltransferase	[c] : C05841 + C00009 <==> C00253 + C00620 + C00080	Nicotinate and nicotinamide metabolism	Metabolism of Cofactors and Vitamins	2.4.2.1	Unigene20031_A0A	Y	-1000	1000	0	2
R02297	Xanthosine:orthophosphate ribosyltransferase	[c] : C01762 + C00009 <==> C00385 + C00620	Purine metabolism	Nucleotide Metabolism	2.4.2.1;2.4.2.-	Unigene20031_A0A	Y	-1000	1000	0	2
R02300	S-Aminomethyldihydrolipoylprotein:(6S)-tetrahydrofolate aminomethyltransferase (ammonia-forming)	[c] : C00445 + C00001 <==> C03479	One carbon pool by folate	Metabolism of Cofactors and Vitamins	2.1.2.10	( Unigene34299_A0A and Unigene50446_A0A )	N	0	1000	0	2
R02301	5-Formyltetrahydrofolate cyclo-ligase (ADP-forming)	[c] : C00002 + C03479 + C00080 <==> C00008 + C00009 + C00445	One carbon pool by folate	Metabolism of Cofactors and Vitamins	6.3.3.2	( Unigene20797_A0A and Unigene2140_A0A and Unigene4971_A0A )	N	0	1000	0	2
R02313	N6-(L-1,3-Dicarboxypropyl)-L-lysine:NAD+ oxidoreductase;N6-(L-1,3-Dicarboxypropyl)-L-lysine:NAD+ oxidoreductase (L-glutamate-forming)	[c] : C00449 + C00003 + C00001 <==> C00025 + C04076 + C00004 + C00080	Lysine degradation	Amino Acid Metabolism	1.5.1.9	( Unigene13689_A0A and Unigene13205_A0A and Unigene49837_A0A and Unigene49255_A0A )	Y	-1000	1000	0	2
R02320	NTP:pyruvate O2-phosphotransferase	[c] : C00454 + C00074 <==> C00201 + C00022	Pyruvate metabolism	Carbohydrate Metabolism	2.7.1.40	( Unigene19080_A0A and Unigene19081_A0A )	N	0	1000	0	2
R02323	Nicotinamide ribonucleotide phosphohydrolase	[c] : C00455 + C00001 <==> C03150 + C00009	Nicotinate and nicotinamide metabolism	Metabolism of Cofactors and Vitamins	3.1.3.5	( Unigene49556_A0A and Unigene39746_A0A and Unigene11171_A0A and Unigene50486_A0A and Unigene24749_A0A and Unigene6641_A0A and Unigene38108_A0A and Unigene22160_A0A and Unigene43269_A0A )	N	0	1000	0	2
R02326	ATP:dCDP phosphotransferase	[c] : C00002 + C00705 <==> C00008 + C00458	Pyrimidine metabolism	Nucleotide Metabolism	2.7.4.6	( Unigene21044_A0A and Unigene16902_A0A and Unigene26862_A0A and Unigene43803_A0A and Unigene36433_A0A )	Y	-1000	1000	0	2
R02327	dCTP:uridine 5'-phosphotransferase	[c] : C00458 + C00299 <==> C00705 + C00105	Pyrimidine metabolism	Nucleotide Metabolism	2.7.1.48	( Unigene1991_A0A and Unigene26015_A0A and Unigene11982_A0A )	N	0	1000	0	2
R02328	dTTP:alpha-D-glucose-1-phosphate thymidylyltransferase	[c] : C00459 + C00103 <==> C00013 + C00842	Streptomycin biosynthesis	Biosynthesis of Other Secondary Metabolites	2.7.7.24		N	0	1000	0	1
R02331	ATP:dUDP phosphotransferase	[c] : C00002 + C01346 <==> C00008 + C00460	Pyrimidine metabolism	Nucleotide Metabolism	2.7.4.6	( Unigene21044_A0A and Unigene16902_A0A and Unigene26862_A0A and Unigene43803_A0A and Unigene36433_A0A )	Y	-1000	1000	0	2
R02332	dUTP:uridine 5'-phosphotransferase	[c] : C00460 + C00299 <==> C01346 + C00105	Pyrimidine metabolism	Nucleotide Metabolism	2.7.1.48	( Unigene1991_A0A and Unigene26015_A0A and Unigene11982_A0A )	N	0	1000	0	2
R02334	[1,4-(N-Acetyl-beta-D-glucosaminyl)]n glycanohydrolase	[c] : C03518 + C00461 <==> C00461 + C00001	Amino sugar and nucleotide sugar metabolism	Carbohydrate Metabolism	3.2.1.14	( Unigene18954_A0A and Unigene21149_A0A and CL214.Contig1_A0A and Unigene24665_A0A ) or ( Unigene49508_A0A and Unigene49741_A0A and Unigene44731_A0A and Unigene45438_A0A and Unigene44916_A0A )	N	0	1000	0	2
R02335	UDP-N-acetyl-D-glucosamine:chitin 4-beta-N-acetylglucosaminyl-transferase	[c] : C00043 + C00461 <==> C00015 + C00461	Amino sugar and nucleotide sugar metabolism	Carbohydrate Metabolism	2.4.1.16	( Unigene28132_A0A and Unigene10278_A0A and Unigene36523_A0A and Unigene29302_A0A and Unigene18506_A0A and Unigene21348_A0A and Unigene14072_A0A )	N	0	1000	0	2
R02350	3'-Phosphoadenylylsulfate:estrone 3-sulfotransferase	[c] : C00053 + C00468 <==> C00054 + C02538	Steroid hormone biosynthesis	Lipid Metabolism	2.8.2.4;2.8.2.15	( Unigene50098_A0A and Unigene12511_A0A and Unigene3786_A0A )	N	0	1000	0	2
R02352	Estradiol-17beta:NAD+ 17-oxidoreductase	[c] : C00951 + C00003 <==> C00468 + C00004 + C00080	Steroid hormone biosynthesis	Lipid Metabolism	1.1.1.51;1.1.1.62	( CL1335.Contig1_A0A and Unigene55738_A0A and Unigene42209_A0A and Unigene33351_A0A and Unigene36628_A0A and Unigene26770_A0A and Unigene3717_A0A and Unigene4816_A0A and Unigene21440_A0A and Unigene46607_A0A and Unigene41101_A0A ) or ( Unigene3097_A0A and Unigene3098_A0A )	Y	-1000	1000	0	2
R02353	Estradiol-17beta:NADP+ 17-oxidoreductase	[c] : C00951 + C00006 <==> C00468 + C00005 + C00080	Steroid hormone biosynthesis	Lipid Metabolism	1.1.1.51;1.1.1.62	( CL1335.Contig1_A0A and Unigene55738_A0A and Unigene42209_A0A and Unigene33351_A0A and Unigene36628_A0A and Unigene26770_A0A and Unigene3717_A0A and Unigene4816_A0A and Unigene21440_A0A and Unigene46607_A0A and Unigene41101_A0A ) or ( Unigene3097_A0A and Unigene3098_A0A )	Y	-1000	1000	0	2
R02354	formation of 2-Hydroxyestrone	[c] : C00468 + C00080 + C00007 + C00004 <==> C05298 + C00003 + C00001	Steroid hormone biosynthesis	Lipid Metabolism	1.14.14.1		N	0	1000	0	1
R02355	formation of 2-Hydroxyestrone	[c] : C00468 + C00080 + C00007 + C00005 <==> C05298 + C00006 + C00001	Steroid hormone biosynthesis	Lipid Metabolism	1.14.14.1		N	0	1000	0	1
R02356	formation of 16alpha-Hydroxyestrone	[c] : C00468 + C00080 + C00007 + C00005 <==> C05300 + C00006 + C00001	Steroid hormone biosynthesis	Lipid Metabolism	1.14.14.1	( CL367.Contig1_A0A and CL1618.Contig1_A0A and Unigene37775_A0A and Unigene28120_A0A and Unigene48800_A0A and Unigene20529_A0A and Unigene25620_A0A ) or ( Unigene20555_A0A )	N	0	1000	0	2
R02358	UDPglucuronate beta-D-glucuronosyltransferase(acceptor-unspecific)	[c] : C00468 + C00167 <==> C11133 + C00015	Steroid hormone biosynthesis	Lipid Metabolism	2.4.1.17	( Unigene49795_A0A ) or ( Unigene49794_A0A and Unigene48897_A0A and Unigene14677_A0A and Unigene27751_A0A and Unigene44191_A0A and Unigene32852_A0A )	N	0	1000	0	2
R02363	Hydroquinone:oxygen oxidoreductase	[c] : 2 C00530 + C00007 <==> 2 C00472 + 2 C00001	Riboflavin metabolism	Metabolism of Cofactors and Vitamins	1.14.18.1	( CL492.Contig1_A0A and Unigene18850_A0A and Unigene18852_A0A and Unigene49439_A0A ) or ( Unigene20224_A0A and Unigene20899_A0A and Unigene19440_A0A and Unigene18681_A0A and Unigene18681_A0A and Unigene18682_A0A )	N	0	1000	0	2
R02366	Acyl-CoA:retinol O-acyltransferase	[c] : C00040 + C00473 <==> C00010 + C02075	Retinol metabolism	Metabolism of Cofactors and Vitamins	2.3.1.76	( Unigene12092_A0A ) or ( Unigene26599_A0A and Unigene21893_A0A )	N	0	1000	0	2
R02367	Palmitoyl-CoA:retinol O-acyltransferase	[c] : C00154 + C00473 <==> C00010 + C02588	Retinol metabolism	Metabolism of Cofactors and Vitamins	2.3.1.76	( Unigene12092_A0A ) or ( Unigene26599_A0A and Unigene21893_A0A )	N	0	1000	0	2
R02369	all-trans-Retinol 11-cis-trans-isomerase	[c] : C00473 <==> C00899	Retinol metabolism	Metabolism of Cofactors and Vitamins	5.2.1.7		N	0	1000	0	1
R02371	dCTP:cytidine 5'-phosphotransferase	[c] : C00458 + C00475 <==> C00705 + C00055	Pyrimidine metabolism	Nucleotide Metabolism	2.7.1.48	( Unigene1991_A0A and Unigene26015_A0A and Unigene11982_A0A )	N	0	1000	0	2
R02372	dUTP:cytidine 5'-phosphotransferase	[c] : C00460 + C00475 <==> C01346 + C00055	Pyrimidine metabolism	Nucleotide Metabolism	2.7.1.48	( Unigene1991_A0A and Unigene26015_A0A and Unigene11982_A0A )	N	0	1000	0	2
R02379	S-Adenosyl-L-methionine:3,4-dihydroxy-trans-cinnamate 3-O-methyltransferase	[c] : C00019 + C05619 <==> C00021 + C00482	Phenylpropanoid biosynthesis	Biosynthesis of Other Secondary Metabolites	2.1.1.68		N	0	1000	0	1
R02382	Tyramine:oxygen oxidoreductase(deaminating)(flavin-containing)	[c] : C00483 + C00001 + C00007 <==> C03765 + C00014 + C00027	Tyrosine metabolism	Amino Acid Metabolism	1.4.3.4;1.4.3.21;1.4.99.4		N	0	1000	0	1
R02383	Monophenol,L-dopa:oxygen oxidoreductase	[c] : C00483 + C00007 + C00004 + C00080 <==> C03758 + C00003 + C00001	Isoquinoline alkaloid biosynthesis	Biosynthesis of Other Secondary Metabolites	1.14.13.-;1.14.18.1	( CL492.Contig1_A0A and Unigene18850_A0A and Unigene18852_A0A and Unigene49439_A0A ) or ( Unigene20224_A0A and Unigene20899_A0A and Unigene19440_A0A and Unigene18681_A0A and Unigene18682_A0A )	N	0	1000	0	2
R02389	UDPglucuronate beta-D-glucuronosyltransferase(acceptor-unspecific)	[c] : 2 C00167 + C00486 <==> 2 C00015 + C05787	Porphyrin and chlorophyll metabolism	Metabolism of Cofactors and Vitamins	2.4.1.17	( Unigene49795_A0A ) or ( Unigene49794_A0A and Unigene48897_A0A and Unigene14677_A0A and Unigene27751_A0A and Unigene44191_A0A and Unigene32852_A0A )	N	0	1000	0	2
R02397	4-Trimethylammoniobutanoate,2-oxoglutarate:oxygen oxidoreductase (3-hydroxylating)	[c] : C01181 + C00026 + C00007 <==> C00487 + C00042 + C00011	Lysine degradation	Amino Acid Metabolism	1.14.11.1	( Unigene40775_A0A and Unigene35666_A0A and Unigene40170_A0A and Unigene38219_A0A and Unigene33823_A0A and Unigene1389_A0A and Unigene17509_A0A ) or ( Unigene40171_A0A )	N	0	1000	0	2
R02408	L-Cystine L-Cysteine-lyase (deaminating)	[c] : C00491 + C00001 <==> C00022 + C00014 + C01962	Cysteine and methionine metabolism	Amino Acid Metabolism	4.4.1.1;4.4.1.8	( Unigene6453_A0A and Unigene6575_A0A and Unigene6574_A0A )	N	0	1000	0	2
R02433	L-cysteate:2-oxoglutarate aminotransferase	[c] : C00506 + C00026 <==> C05528 + C00025	Cysteine and methionine metabolism	Amino Acid Metabolism	2.6.1.1	( Unigene48841_A0A and Unigene8075_A0A and Unigene41064_A0A )	Y	-1000	1000	0	2
R02457	D-Ornithine:oxygen oxidoreductase (deaminating)	[c] : C00515 + C00001 + C00007 <==> C01110 + C00014 + C00027	D-Arginine and D-ornithine metabolism	Metabolism of Other Amino Acids	1.4.3.3	( Unigene6815_A0A and Unigene10145_A0A and Unigene22101_A0A )	N	0	1000	0	2
R02464	Sphinganine-1-phosphate pamlmitaldehyde-lyase	[c] : C01120 <==> C00346 + C00517	Sphingolipid metabolism	Lipid Metabolism	4.1.2.27	( Unigene958_A0A and Unigene183_A0A )	N	0	1000	0	2
R02466	3-Sulfino-L-alanine carboxy-lyase	[c] : C00606 <==> C00519 + C00011	Taurine and hypotaurine metabolism	Metabolism of Other Amino Acids	4.1.1.15;4.1.1.29		N	0	1000	0	2
R02478	UDPglucuronate beta-D-glucuronosyltransferase(acceptor-unspecific)	[c] : C00523 + C00167 <==> C11135 + C00015	Steroid hormone biosynthesis	Lipid Metabolism	2.4.1.17	( Unigene49795_A0A ) or ( Unigene49794_A0A and Unigene48897_A0A and Unigene14677_A0A and Unigene27751_A0A and Unigene44191_A0A and Unigene32852_A0A )	N	0	1000	0	2
R02480	Cytochrome c apocytochrome-c-lyase	[c] : C02248 + C00032 <==> C00524	Porphyrin and chlorophyll metabolism	Metabolism of Cofactors and Vitamins	4.4.1.17	( Unigene11252_A0A and Unigene52101_A0A )	N	0	1000	0	2
R02484	deoxyuridine:orthophosphate 2-deoxy-D-ribosyltransferase;deoxyuridine:orthophosphate ribosyltransferase	[c] : C00526 + C00009 <==> C00106 + C00672	Pyrimidine metabolism	Nucleotide Metabolism	2.4.2.1;2.4.2.4;2.4.2.23	( ( Unigene20031_A0A ) or ( Unigene19170_A0A ) or ( Unigene30369_A0A ) )	N	0	1000	0	2
R02487	Glutaryl-CoA:(acceptor) 2,3-oxidoreductase (decarboxylating)	[c] : C00527 + C00016 <==> C01352 + C00877 + C00011	Fatty acid metabolism	Lipid Metabolism	1.3.99.7	Unigene49127_A0A	N	0	1000	0	2
R02488	Glutaryl-CoA:(acceptor) 2,3-oxidoreductase (decarboxylating)	[c] : C00527 + C00028 <==> C00877 + C00030 + C00011	Lysine degradation	Amino Acid Metabolism	1.3.99.7	Unigene49127_A0A	N	0	1000	0	2
R02494	pyridoxamine-5'-phosphate phosphohydrolase	[c] : C00647 + C00001 <==> C00534 + C00009	Vitamin B6 metabolism	Metabolism of Cofactors and Vitamins	3.1.3.74	Unigene34035_A0A	N	0	1000	0	2
R02502	17beta-hydroxysteroid UDP-glucuronosyltransferase	[c] : C00535 + C00167 <==> C11134 + C00015	Steroid hormone biosynthesis	Lipid Metabolism	2.4.1.17	( Unigene49795_A0A ) or ( Unigene49794_A0A and Unigene48897_A0A and Unigene14677_A0A and Unigene27751_A0A and Unigene44191_A0A and Unigene32852_A0A )	N	0	1000	0	2
R02514	4-hydroxyphenylacetate,NADH:oxygen oxidoreductase (1-hydroxylating)	[c] : C00642 + C00007 + C00004 + C00080 <==> C00544 + C00003 + C00001	Tyrosine metabolism	Amino Acid Metabolism	1.14.13.18		N	0	1000	0	1
R02516	4-hydroxyphenylacetate,NADPH:oxygen oxidoreductase (1-hydroxylating)	[c] : C00642 + C00007 + C00005 + C00080 <==> C00544 + C00006 + C00001	Tyrosine metabolism	Amino Acid Metabolism	1.14.13.18		N	0	1000	0	1
R02519	Homogentisate:oxygen 1,2-oxidoreductase (decyclizing)	[c] : C00544 + C00007 <==> C01036	Tyrosine metabolism	Amino Acid Metabolism	1.13.11.5	( Unigene35460_A0A and Unigene28716_A0A and Unigene37315_A0A )	N	0	1000	0	2
R02521	4-Hydroxyphenylpyruvate:oxygen oxidoreductase (hydroxylating,decarboxylating)	[c] : C01179 + C00007 <==> C00544 + C00011	Ubiquinone and other terpenoid-quinone biosynthesis	Metabolism of Cofactors and Vitamins	1.13.11.27		N	0	1000	0	2
R02527	(R)-Lactaldehyde:NAD+ oxidoreductase	[c] : C00937 + C00003 <==> C00546 + C00004 + C00080	Pyruvate metabolism	Carbohydrate Metabolism	1.1.1.78;1.1.1.79	( Unigene25077_A0A and Unigene50679_A0A )	Y	-1000	1000	0	2
R02530	(R)-S-Lactoylglutathione methylglyoxal-lyase (isomerizing)	[c] : C03451 <==> C00051 + C00546	Pyruvate metabolism	Carbohydrate Metabolism	4.4.1.5	( CL1687.Contig1_A0A )	Y	-1000	1000	0	2
R02531	Lactaldehyde:NAD+ 1-oxidoreductase	[c] : C00546 + C00004 + C00080 <==> C05999 + C00003	Pyruvate metabolism	Carbohydrate Metabolism	1.1.1.21	( Unigene18863_A0A and Unigene26785_A0A and Unigene225_A0A and Unigene42171_A0A )	N	0	1000	0	2
R02532	4-[(1R)-2-Amino-1-hydroxyethyl]-1,2-benzenediol:oxygen oxidoreductase(deaminating)(flavin-containing)	[c] : C00547 + C00001 + C00007 <==> C05577 + C00014 + C00027	Tyrosine metabolism	Amino Acid Metabolism	1.4.3.4		N	0	1000	0	1
R02533	S-Adenosyl-L-methionine:phenylethanolamine N-methyltransferase	[c] : C00019 + C00547 <==> C00021 + C00788	Tyrosine metabolism	Amino Acid Metabolism	2.1.1.28		N	0	1000	0	1
R02534	S-Adenosyl-L-methionine:catechol O-methyltransferase	[c] : C00019 + C00547 <==> C00021 + C05589	Tyrosine metabolism	Amino Acid Metabolism	2.1.1.6	Unigene25509_A0A	N	0	1000	0	2
R02535	3,4-dihydroxyphenetylamine,ascorbate:oxygen oxidoreductase (beta-hydroxylating)	[c] : C03758 + C00072 + C00007 <==> C00547 + C05422 + C00001	Tyrosine metabolism	Amino Acid Metabolism	1.14.17.1	( Unigene23436_A0A and Unigene32961_A0A )	N	0	1000	0	2
R02536	Phenylacetaldehyde:NAD+ oxidoreductase	[c] : C00601 + C00003 + C00001 <==> C07086 + C00004 + C00080	Phenylalanine metabolism	Amino Acid Metabolism	1.2.1.5;1.2.1.39	( Unigene25877_A0A and Unigene2472_A0A ) or ( Unigene48345_A0A )	Y	-1000	1000	0	2
R02537	Aldehyde:NADP+ oxidoreductase	[c] : C00601 + C00006 + C00001 <==> C07086 + C00005 + C00080	Phenylalanine metabolism	Amino Acid Metabolism	1.2.1.5	( Unigene25877_A0A and Unigene2472_A0A ) or ( Unigene48345_A0A )	Y	-1000	1000	0	2
R02540	2-phenylacetamide amidohydrolase	[c] : C02505 + C00001 <==> C07086 + C00014	Phenylalanine metabolism	Amino Acid Metabolism	3.5.1.4	( Unigene14329_A0A and Unigene10776_A0A )	N	0	1000	0	2
R02541	Sphingomyelin cholinephosphohydrolase	[c] : C00550 + C00001 <==> C00195 + C00588	Sphingolipid metabolism	Lipid Metabolism	3.1.4.12	( Unigene49849_A0A and Unigene31651_A0A and Unigene4956_A0A and Unigene13693_A0A and Unigene15489_A0A and Unigene38126_A0A ) or ( Unigene28073_A0A and Unigene36333_A0A and Unigene15377_A0A and Unigene23247_A0A and Unigene51796_A0A and Unigene51687_A0A )	N	0	1000	0	2
R02549	4-aminobutanal:NAD+ 1-oxidoreductase;4-aminobutyraldehyde:NAD+ oxidoreductase	[c] : C00555 + C00003 + C00001 <==> C00334 + C00004 + C00080	Arginine and proline metabolism	Amino Acid Metabolism	1.2.1.3;1.2.1.19;1.2.1.-	( Unigene45813_A0A and Unigene25877_A0A and Unigene25916_A0A and Unigene48344_A0A and Unigene2472_A0A and Unigene27550_A0A and Unigene12647_A0A and Unigene45632_A0A and Unigene30385_A0A and Unigene56244_A0A and Unigene1690_A0A and Unigene24755_A0A and Unigene13946_A0A and Unigene33389_A0A and Unigene22602_A0A ) or ( Unigene48345_A0A )	N	0	1000	0	2
R02556	Deoxyadenosine aminohydrolase	[c] : C00559 + C00001 <==> C05512 + C00014	Purine metabolism	Nucleotide Metabolism	3.5.4.4	( Unigene51410_A0A and Unigene49593_A0A and Unigene45752_A0A and Unigene1964_A0A )	Y	-1000	1000	0	2
R02557	Deoxyadenosine:orthophosphate ribosyltransferase	[c] : C00147 + C00672 <==> C00559 + C00009	Purine metabolism	Nucleotide Metabolism	2.4.2.1	Unigene20031_A0A	Y	-1000	1000	0	2
R02565	p-cumic alcohol:NAD+ oxidoreductase	[c] : C00576 + C00003 + C00001 <==> C00719 + C00004 + 2 C00080	Glycine, serine and threonine metabolism	Amino Acid Metabolism	1.2.1.8	( Unigene45632_A0A and Unigene24755_A0A )	N	0	1000	0	2
R02566	p-Cumic alcohol:NADP+ oxidoreductase	[c] : C00576 + C00006 + C00001 <==> C00719 + C00005 + 2 C00080	Glycine, serine and threonine metabolism	Amino Acid Metabolism	1.2.1.8	( Unigene45632_A0A and Unigene24755_A0A )	N	0	1000	0	2
R02568	D-Fructose 1-phosphate D-glyceraldehyde-3-phosphate-lyase	[c] : C01094 <==> C00111 + C00577	Fructose and mannose metabolism	Carbohydrate Metabolism	4.1.2.13	( Unigene19089_A0A and Unigene18845_A0A and Unigene19088_A0A )	Y	-1000	1000	0	2
R02569	acetyl-CoA:enzyme N6-(dihydrolipoyl)lysine S-acetyltransferase	[c] : C00024 + C15973 <==> C00010 + C16255	Glycolysis / Gluconeogenesis	Carbohydrate Metabolism	2.3.1.12	( Unigene56276_A0A and Unigene44699_A0A and Unigene47991_A0A and Unigene54342_A0A and Unigene49068_A0A and Unigene17224_A0A )	Y	-1000	1000	0	2
R02570	succinyl-CoA:enzyme N6-(dihydrolipoyl)lysine S-succinyltransferase	[c] : C00091 + C15973 <==> C00010 + C16254	Citrate cycle (TCA cycle)	Carbohydrate Metabolism	2.3.1.61	( Unigene40693_A0A and Unigene19005_A0A and Unigene20494_A0A and Unigene45631_A0A and Unigene16363_A0A and Unigene21191_A0A and Unigene42678_A0A and Unigene2539_A0A and Unigene2016_A0A and Unigene10915_A0A and Unigene25936_A0A and Unigene21013_A0A and Unigene15423_A0A and Unigene13925_A0A and Unigene52275_A0A and Unigene13053_A0A and Unigene22804_A0A and Unigene27789_A0A and Unigene52214_A0A and …	Y	-1000	1000	0	2
R02571	Glutaryl-CoA:dihydrolipoamide S-succinyltransferase	[c] : C00010 + C06157 <==> C00527 + C15973	Lysine degradation	Amino Acid Metabolism	2.3.1.61	( Unigene40693_A0A and Unigene19005_A0A and Unigene20494_A0A and Unigene45631_A0A and Unigene16363_A0A and Unigene21191_A0A and Unigene42678_A0A and Unigene2539_A0A and Unigene2016_A0A and Unigene10915_A0A and Unigene25936_A0A and Unigene21013_A0A and Unigene15423_A0A and Unigene13925_A0A and Unigene52275_A0A and Unigene13053_A0A and Unigene22804_A0A and Unigene27789_A0A and Unigene52214_A0A and …	Y	-1000	1000	0	2
R02577	Propane-1,2-diol:NAD+ 1-oxidoreductase	[c] : C05999 + C00005 + C00080 <==> C00583 + C00006	Glycerolipid metabolism	Lipid Metabolism	1.1.1.21	( Unigene18863_A0A and Unigene26785_A0A and Unigene225_A0A and Unigene42171_A0A )	N	0	1000	0	2
R02581	(5Z,13E)-(15S)-9alpha,11alpha,15-trihydroxyprosta-5,13-dienoate:NADP+ 9-oxidoreductase;Prostaglandin F2alpha:NADP+ oxidoreductase	[c] : C00584 + C00005 + C00080 <==> C00639 + C00006	Arachidonic acid metabolism	Lipid Metabolism	1.1.1.184;1.1.1.189	Unigene24935_A0A	N	0	1000	0	2
R02590	CTP:choline-phosphate cytidylyltransferase	[c] : C00063 + C06459 <==> C00013 + C05674	Phosphonate and phosphinate metabolism	Metabolism of Other Amino Acids	2.7.7.15	Unigene26199_A0A	N	0	1000	0	2
R02596	Donor:hydrogen-peroxide oxidoreductase	[c] : C00590 <==> C15805	Phenylpropanoid biosynthesis	Biosynthesis of Other Secondary Metabolites	1.11.1.7	Unigene20461_A0A	N	0	1000	0	2
R02619	3-sulfino-L-alanine:2-oxoglutarate aminotransferase	[c] : C00606 + C00026 <==> C05527 + C00025	Cysteine and methionine metabolism	Amino Acid Metabolism	2.6.1.1	( Unigene48841_A0A and Unigene8075_A0A and Unigene41064_A0A )	N	0	1000	0	2
R02640	L-Gulonate:NAD+ 3-oxidoreductase	[c] : C00800 + C00003 <==> C00618 + C00004 + C00080	Pentose and glucuronate interconversions	Carbohydrate Metabolism	1.1.1.45	Unigene40291_A0A	Y	-1000	1000	0	2
R02661	2-methylpropanoyl-CoA:(acceptor) 2,3-oxidoreductase	[c] : C00630 + C00028 <==> C03460 + C00030	Valine, leucine and isoleucine degradation	Amino Acid Metabolism	1.3.8.1;1.3.99.3;1.3.99.12;1.3.99.-	( ( Unigene53730_A0A ) or ( Unigene56370_A0A and Unigene5022_A0A ) or ( Unigene54425_A0A and Unigene6605_A0A and Unigene15990_A0A and Unigene18266_A0A and Unigene47553_A0A ) )	Y	-1000	1000	0	2
R02662	2-methylpropanoyl-CoA:enzyme N6-(dihydrolipoyl)lysine S-(2-methylpropanoyl)transferase	[c] : C00010 + C15977 <==> C00630 + C15973	Valine, leucine and isoleucine degradation	Amino Acid Metabolism	2.3.1.168	( Unigene55449_A0A and Unigene47340_A0A )	N	0	1000	0	2
R02665	3-Hydroxyanthranilate:oxygen 3,4-oxidoreductase (decyclizing)	[c] : C00632 + C00007 <==> C04409	Tryptophan metabolism	Amino Acid Metabolism	1.13.11.6	( Unigene26825_A0A and Unigene28622_A0A )	N	0	1000	0	2
R02668	3-Hydroxy-L-kynurenine hydrolase	[c] : C03227 + C00001 <==> C00632 + C00041	Tryptophan metabolism	Amino Acid Metabolism	3.7.1.3		N	0	1000	0	1
R02670	formation of Cinnavalininate	[c] : 2 C00632 + 4 C00007 <==> C05640 + 2 C00704 + 2 C00027 + 2 C00080	Tryptophan metabolism	Amino Acid Metabolism	1.11.1.6	Unigene18849_A0A	N	0	1000	0	2
R02678	Indole-3-acetaldehyde:NAD+ oxidoreductase	[c] : C00637 + C00003 + C00001 <==> C00954 + C00004 + C00080	Tryptophan metabolism	Amino Acid Metabolism	1.2.1.3	( Unigene45813_A0A and Unigene25877_A0A and Unigene25916_A0A and Unigene48344_A0A and Unigene2472_A0A and Unigene27550_A0A and Unigene12647_A0A and Unigene45632_A0A and Unigene30385_A0A and Unigene56244_A0A and Unigene1690_A0A and Unigene24755_A0A and Unigene13946_A0A and Unigene33389_A0A and Unigene22602_A0A ) or ( Unigene48345_A0A )	N	0	1000	0	2
R02687	1,2-diacyl-sn-glycerol acylhydrolase	[c] : C00641 + C00001 <==> C01885 + C00162	Glycerolipid metabolism	Lipid Metabolism	3.1.1.3	( Unigene20446_A0A and CL310.Contig1_A0A and Unigene15728_A0A and Unigene1571_A0A and Unigene41281_A0A and Unigene12183_A0A and CL1373.Contig1_A0A and Unigene12672_A0A and Unigene26991_A0A and Unigene24605_A0A ) or ( Unigene35593_A0A )	N	0	1000	0	2
R02695	4-Hydroxyphenylacetaldehyde:NAD+ oxidoreductase	[c] : C03765 + C00003 + C00001 <==> C00642 + C00004 + C00080	Tyrosine metabolism	Amino Acid Metabolism	1.2.1.5;1.2.1.29;1.2.1.53	( Unigene25877_A0A and Unigene2472_A0A ) or ( Unigene48345_A0A )	Y	-1000	1000	0	2
R02697	4-Hydroxyphenylacetaldehyde:NADP+ oxidoreductase	[c] : C03765 + C00006 + C00001 <==> C00642 + C00005 + C00080	Tyrosine metabolism	Amino Acid Metabolism	1.2.1.5	( Unigene25877_A0A and Unigene2472_A0A ) or ( Unigene48345_A0A )	Y	-1000	1000	0	2
R02698	4-hydroxyphenylacetate,NADH:oxygen oxidoreductase (3-hydroxylating)	[c] : C00642 + C00007 + C00004 + C00080 <==> C01161 + C00003 + C00001	Tyrosine metabolism	Amino Acid Metabolism	1.14.13.3		N	0	1000	0	1
R02701	5-Hydroxy-L-tryptophan decarboxy-lyase	[c] : C00643 <==> C00780 + C00011	Tryptophan metabolism	Amino Acid Metabolism	4.1.1.28		N	0	1000	0	2
R02719	Xanthosine 5'-phosphate phosphohydrolase	[c] : C00655 + C00001 <==> C01762 + C00009	Purine metabolism	Nucleotide Metabolism	3.1.3.5	( Unigene49556_A0A and Unigene39746_A0A and Unigene11171_A0A and Unigene50486_A0A and Unigene24749_A0A and Unigene6641_A0A and Unigene38108_A0A and Unigene22160_A0A and Unigene43269_A0A )	N	0	1000	0	2
R02720	XTP pyrophosphohydrolase	[c] : C00700 + C00001 <==> C00655 + C00013	Purine metabolism	Nucleotide Metabolism	3.6.1.19		N	0	1000	0	1
R02723	formation of 22beta-Hydroxycholesterol	[c] : C00187 + C00007 + 2 C00662 + C00080 <==> C05502 + C00001 + 2 C00667	Steroid hormone biosynthesis	Lipid Metabolism	1.14.15.6	Unigene45215_A0A	N	0	1000	0	2
R02725	Androstenedione,reduced-adrenal-ferredoxin:oxygen oxidoreductase (11-hydroxylating)	[c] : C00662 + C00280 + C00007 <==> C05284 + C00667 + C00001	Steroid hormone biosynthesis	Lipid Metabolism	1.14.15.4		N	0	1000	0	1
R02731	D-Fructose-2,6-bisphosphate 2-phosphohydrolase	[c] : C00665 + C00001 <==> C05345 + C00009	Fructose and mannose metabolism	Carbohydrate Metabolism	3.1.3.46	( Unigene30079_A0A and Unigene20873_A0A and Unigene24842_A0A and Unigene33973_A0A )	N	0	1000	0	2
R02736	beta-D-Glucose-6-phosphate:NADP+ 1-oxoreductase	[c] : C01172 + C00006 <==> C01236 + C00005 + C00080	Pentose phosphate pathway	Carbohydrate Metabolism	1.1.1.49	( Unigene7650_A0A and Unigene22071_A0A )	N	0	1000	0	2
R02737	UDPglucose:D-glucose-6-phosphate 1-alpha-D-glucosyltransferase	[c] : C00029 + C00668 <==> C00015 + C00689	Starch and sucrose metabolism	Carbohydrate Metabolism	2.4.1.15	( Unigene43023_A0A and Unigene21089_A0A and Unigene18978_A0A ) or ( Unigene10071_A0A )	N	0	1000	0	2
R02739	alpha-D-Glucose 6-phosphate ketol-isomerase	[c] : C00668 <==> C01172	Glycolysis / Gluconeogenesis	Carbohydrate Metabolism	5.1.3.15;5.3.1.9	( Unigene21101_A0A and Unigene48216_A0A ) or ( Unigene23661_A0A )	Y	-1000	1000	0	2
R02740	alpha-D-Glucose 6-phosphate ketol-isomerase	[c] : C00668 <==> C05345	Glycolysis / Gluconeogenesis	Carbohydrate Metabolism	5.3.1.9	( Unigene21101_A0A and Unigene48216_A0A ) or ( Unigene23661_A0A )	Y	-1000	1000	0	2
R02746	1-Acyl-sn-glycero-3-phosphocholine acylhydrolase	[c] : C04230 + C00001 <==> C00670 + C00162	Glycerophospholipid metabolism	Lipid Metabolism	3.1.1.5	( Unigene54632_A0A and Unigene34258_A0A and Unigene33536_A0A and Unigene4903_A0A and Unigene53413_A0A and Unigene42382_A0A and Unigene31684_A0A )	N	0	1000	0	2
R02747	2-Acyl-sn-glycero-3-phosphocholine acylhydrolase	[c] : C04233 + C00001 <==> C00670 + C00162	Glycerophospholipid metabolism	Lipid Metabolism	3.1.1.5	( Unigene8411_A0A and Unigene54632_A0A and Unigene34258_A0A and Unigene33536_A0A and Unigene42382_A0A and Unigene31684_A0A )	N	0	1000	0	2
R02748	Deoxyinosine:orthophosphate ribosyltransferase	[c] : C05512 + C00009 <==> C00262 + C00672	Purine metabolism	Nucleotide Metabolism	2.4.2.1;2.4.2.4	Unigene20031_A0A	N	0	1000	0	2
R02750	formation of 2-Deoxy-D-ribose 5-phosphate	[c] : C01801 + C00002 <==> C00673 + C00008	Pentose phosphate pathway	Carbohydrate Metabolism	2.7.1.15	Unigene29362_A0A	Y	-1000	1000	0	2
R02756	formation of 1-Acyl-sn-glycerol 3-phosphate	[c] : C03372 + C00005 + C00080 <==> C00681 + C00006	Glycerophospholipid metabolism	Lipid Metabolism	1.1.1.101		N	0	1000	0	1
R02757	ATP:acylglycerol 3-phosphotransferase	[c] : C00002 + C01885 <==> C00008 + C00681	Glycerolipid metabolism	Lipid Metabolism	2.7.1.94	Unigene18253_A0A	N	0	1000	0	2
R02765	Methylmalonyl-CoA epimerase	[c] : C00683 <==> C01213	Valine, leucine and isoleucine degradation	Amino Acid Metabolism	5.1.99.1	Unigene663_A0A	N	0	1000	0	2
R02805	P1,P4-Bis(5'-nucleosyl)-tetraphosphate nucleotidohydrolase	[c] : C04392 + C00001 <==> C00700 + C00655	Purine metabolism	Nucleotide Metabolism	3.6.1.17	Unigene27515_A0A	N	0	1000	0	2
R02821	Trimethylaminoacetate:L-homosysteine S-methyltransferase	[c] : C00719 + C00155 <==> C01026 + C00073	Glycine, serine and threonine metabolism	Amino Acid Metabolism	2.1.1.5	( Unigene56449_A0A and Unigene54362_A0A and Unigene54241_A0A and Unigene26125_A0A )	N	0	1000	0	1
R02824	glutathione:insulin oxidoreductase	[c] : C00723 + 2 C00051 <==> C02288 + C00127	Glutathione metabolism	Metabolism of Other Amino Acids	1.8.4.2	( Unigene24825_A0A and Unigene3847_A0A )	N	0	1000	0	2
R02834	Cortisol:NAD+ 11-oxidoreductase	[c] : C00735 + C00003 <==> C00762 + C00004 + C00080	Steroid hormone biosynthesis	Lipid Metabolism	1.1.1.146;1.1.1.-	Unigene4816_A0A	N	0	1000	0	2
R02836	Cortisol:NADP+ 11-oxidoreductase	[c] : C00735 + C00006 <==> C00762 + C00005 + C00080	Steroid hormone biosynthesis	Lipid Metabolism	1.1.1.146;1.1.1.-	Unigene4816_A0A	N	0	1000	0	2
R02869	S-adenosylmethioninamine:spermidine 3-aminopropyltransferase	[c] : C01137 + C00315 <==> C00170 + C00750	Cysteine and methionine metabolism	Amino Acid Metabolism	2.5.1.16;2.5.1.22	( ( Unigene43513_A0A ) or ( Unigene628_A0A ) )	N	0	1000	0	2
R02894	D-Proline:oxygen oxidoreductase	[c] : C00763 + C00007 <==> C03564 + C00027	Arginine and proline metabolism	Amino Acid Metabolism	1.4.3.3	( Unigene6815_A0A and Unigene10145_A0A and Unigene22101_A0A )	N	0	1000	0	2
R02902	formation of all-trans-Retinoyl-beta-glucuronide	[c] : C00777 + C00167 <==> C11061 + C00015	Retinol metabolism	Metabolism of Cofactors and Vitamins	2.4.1.17	( Unigene49795_A0A ) or ( Unigene49794_A0A and Unigene48897_A0A and Unigene14677_A0A and Unigene27751_A0A and Unigene44191_A0A and Unigene32852_A0A )	N	0	1000	0	2
R02908	5-Hydroxytryptamine:oxygen oxidoreductase(deaminating)(flavin-containing)	[c] : C00780 + C00001 + C00007 <==> C05634 + C00014 + C00027	Tryptophan metabolism	Amino Acid Metabolism	1.4.3.4		N	0	1000	0	1
R02918	L-Tyrosine:tRNA(Tyr) ligase (AMP-forming)	[c] : C00002 + C00082 + C00787 <==> C00020 + C00013 + C02839	Aminoacyl-tRNA biosynthesis	Translation	6.1.1.1	( Unigene50489_A0A and Unigene32157_A0A and Unigene733_A0A and Unigene23701_A0A and Unigene33159_A0A and Unigene14865_A0A )	N	0	1000	0	2
R02919	4-[(1R)-1-Hydroxy-2-(methylamino)ethyl]-1,2-benzenediol:oxygen oxidoreductase(deaminating)(flavin-containing)	[c] : C00788 + C00001 + C00007 <==> C05577 + C00218 + C00027	Tyrosine metabolism	Amino Acid Metabolism	1.4.3.4		N	0	1000	0	1
R02920	S-Adenosyl-L-methionine:catechol O-methyltransferase	[c] : C00019 + C00788 <==> C00021 + C05588	Tyrosine metabolism	Amino Acid Metabolism	2.1.1.6	Unigene25509_A0A	N	0	1000	0	2
R02933	L-Gulono-1,4-lactone lactonohydrolase	[c] : C01040 + C00001 <==> C00800	Ascorbate and aldarate metabolism	Carbohydrate Metabolism	3.1.1.17;3.1.1.25	( Unigene45363_A0A and Unigene26891_A0A ) or ( Unigene56862_A0A )	Y	-1000	1000	0	2
R02940	2-Propyn-1-al:NAD+ oxidoreductase	[c] : C05985 + C00003 + C00001 <==> C00804 + C00004 + C00080	Propanoate metabolism	Carbohydrate Metabolism	1.2.1.3	( Unigene45813_A0A and Unigene25877_A0A and Unigene25916_A0A and Unigene48344_A0A and Unigene2472_A0A and Unigene27550_A0A and Unigene12647_A0A and Unigene30385_A0A and Unigene56244_A0A and Unigene1690_A0A and Unigene13946_A0A and Unigene33389_A0A and Unigene22602_A0A ) or ( Unigene48345_A0A )	N	0	1000	0	2
R02957	D-Glucuronolactone:NAD+ oxidoreductase	[c] : C02670 + C00003 + 2 C00001 <==> C00818 + C00004 + C00080	Ascorbate and aldarate metabolism	Carbohydrate Metabolism	1.2.1.3	( Unigene45813_A0A and Unigene25877_A0A and Unigene25916_A0A and Unigene48344_A0A and Unigene2472_A0A and Unigene27550_A0A and Unigene12647_A0A and Unigene45632_A0A and Unigene30385_A0A and Unigene56244_A0A and Unigene1690_A0A and Unigene24755_A0A and Unigene13946_A0A and Unigene33389_A0A and Unigene22602_A0A ) or ( Unigene48345_A0A )	Y	-1000	1000	0	2
R02971	ATP:pantothenate 4'-phosphotransferase	[c] : C00002 + C00831 <==> C00008 + C01134	Pantothenate and CoA biosynthesis	Metabolism of Cofactors and Vitamins	2.7.1.33;2.7.1.34	( Unigene26783_A0A and Unigene42701_A0A and Unigene36022_A0A and Unigene41421_A0A )	N	0	1000	0	2
R02976	ATP:sphinganine 1-phosphotransferase	[c] : C00002 + C00836 <==> C00008 + C01120	Sphingolipid metabolism	Lipid Metabolism	2.7.1.91	( Unigene23804_A0A and Unigene18065_A0A )	N	0	1000	0	2
R02978	Sphinganine:NADP+ 3-oxidoreductase	[c] : C02934 + C00005 + C00080 <==> C00836 + C00006	Sphingolipid metabolism	Lipid Metabolism	1.1.1.102	Unigene42247_A0A	N	0	1000	0	2
R03004	Deamino-NAD+ nucleotidohydrolase	[c] : C00857 + C00001 <==> C00020 + C01185	Nicotinate and nicotinamide metabolism	Metabolism of Cofactors and Vitamins	3.6.1.9;3.6.1.22	( Unigene15522_A0A and Unigene6586_A0A and Unigene35482_A0A and Unigene22325_A0A and Unigene13055_A0A and Unigene16733_A0A and Unigene24143_A0A and Unigene47033_A0A )	N	0	1000	0	2
R03005	ATP:nicotinamide-nucleotide adenylyltransferase	[c] : C00002 + C01185 <==> C00013 + C00857	Nicotinate and nicotinamide metabolism	Metabolism of Cofactors and Vitamins	2.7.7.1;2.7.7.18	( Unigene2026_A0A ) or ( Unigene46205_A0A )	Y	-1000	1000	0	2
R03018	ATP:pantothenate 4'-phosphotransferase	[c] : C00002 + C00864 <==> C00008 + C03492	Pantothenate and CoA biosynthesis	Metabolism of Cofactors and Vitamins	2.7.1.33	( Unigene26783_A0A and Unigene42701_A0A and Unigene36022_A0A and Unigene41421_A0A )	N	0	1000	0	2
R03024	4-Nitrophenyl phosphate phosphohydrolase	[c] : C03360 + C00001 <==> C00870 + C00009	Aminobenzoate degradation	Xenobiotics Biodegradation and Metabolism	3.1.3.1;3.1.3.2;3.1.3.41	( ( Unigene32_A0A ) or ( Unigene4732_A0A and Unigene5822_A0A ) or ( Unigene35166_A0A and Unigene8267_A0A and Unigene5777_A0A and Unigene26539_A0A ) or ( Unigene966_A0A and Unigene18362_A0A and Unigene8269_A0A and Unigene41274_A0A ) )	N	0	1000	0	2
R03026	(S)-3-Hydroxybutanoyl-CoA hydro-lyase	[c] : C01144 <==> C00877 + C00001	Fatty acid metabolism	Lipid Metabolism	4.2.1.17;4.2.1.55	( Unigene26354_A0A and Unigene44656_A0A and Unigene25565_A0A and Unigene14392_A0A and Unigene55152_A0A and Unigene11708_A0A and Unigene29182_A0A and Unigene31479_A0A )	Y	-1000	1000	0	2
R03036	Dephospho-CoA nucleotidohydrolase	[c] : C01134 + C00020 <==> C00882 + C00001	Pantothenate and CoA biosynthesis	Metabolism of Cofactors and Vitamins	3.6.1.9	( Unigene15522_A0A and Unigene6586_A0A and Unigene35482_A0A and Unigene22325_A0A and Unigene13055_A0A and Unigene16733_A0A and Unigene24143_A0A and Unigene47033_A0A )	Y	-1000	1000	0	2
R03038	L-Alanine:tRNA(Ala) ligase (AMP-forming)	[c] : C00002 + C00041 + C01635 <==> C00020 + C00013 + C00886	Aminoacyl-tRNA biosynthesis	Translation	6.1.1.7	( Unigene1063_A0A and Unigene53281_A0A and Unigene46861_A0A and Unigene30082_A0A and Unigene17969_A0A and Unigene14901_A0A )	N	0	1000	0	2
R03045	3-Hydroxypropionyl-CoA hydro-lyase	[c] : C05668 <==> C00894 + C00001	beta-Alanine metabolism	Metabolism of Other Amino Acids	4.2.1.17;4.2.1.116	( Unigene26354_A0A and Unigene44656_A0A and Unigene25565_A0A and Unigene14392_A0A and Unigene55152_A0A and Unigene11708_A0A and Unigene29182_A0A )	Y	-1000	1000	0	2
R03048	11-cis-Retinol:NAD+ oxidoreductase	[c] : C02110 + C00004 + C00080 <==> C00899 + C00003	Retinol metabolism	Metabolism of Cofactors and Vitamins	1.1.1.-	Unigene15390_A0A	Y	-1000	1000	0	2
R03055	5,6-Dihydrothymine amidohydrolase	[c] : C00906 + C00001 <==> C05100	Pyrimidine metabolism	Nucleotide Metabolism	3.5.2.2	( Unigene49762_A0A and Unigene22851_A0A )	Y	-1000	1000	0	2
R03057	(7E,9E,11Z,14Z)-(5S,6S)-5,6-Epoxyicosa-7,9,11,14-tetraenoate hydrolase	[c] : C00909 + C00001 <==> C02165	Arachidonic acid metabolism	Lipid Metabolism	3.3.2.6	( Unigene22338_A0A and Unigene4109_A0A and Unigene33771_A0A and Unigene3709_A0A )	N	0	1000	0	2
R03058	arachidonate:oxygen 5-oxidoreductase	[c] : C05356 <==> C00909 + C00001	Arachidonic acid metabolism	Lipid Metabolism	1.13.11.34	Unigene45097_A0A	N	0	1000	0	2
R03059	(7E,9E,11Z,14Z)-(5S,6S)-5,6-Epoxyicosa-7,9,11,14-tetraenoate:glutathione leukotriene-transferase (epoxide-ring-opening)	[c] : C00909 + C00051 <==> C02166	Arachidonic acid metabolism	Lipid Metabolism	4.4.1.20		N	0	1000	0	1
R03088	formation of 2-Hydroxyestradiol	[c] : C00951 + C00080 + C00007 + C00004 <==> C05301 + C00003 + C00001	Steroid hormone biosynthesis	Lipid Metabolism	1.14.14.1		N	0	1000	0	1
R03090	formation of 2-Hydroxyestradiol	[c] : C00951 + C00080 + C00007 + C00005 <==> C05301 + C00006 + C00001	Steroid hormone biosynthesis	Lipid Metabolism	1.14.14.1		N	0	1000	0	1
R03091	UDPglucuronate beta-D-glucuronosyltransferase(acceptor-unspecific)	[c] : C00951 + C00167 <==> C05503 + C00015	Steroid hormone biosynthesis	Lipid Metabolism	2.4.1.17	( Unigene49795_A0A ) or ( Unigene49794_A0A and Unigene48897_A0A and Unigene14677_A0A and Unigene27751_A0A and Unigene44191_A0A and Unigene32852_A0A )	N	0	1000	0	2
R03096	Indole-3-acetamide amidohydrolase	[c] : C02693 + C00001 <==> C00954 + C00014	Tryptophan metabolism	Amino Acid Metabolism	3.5.1.4	( Unigene14329_A0A and Unigene10776_A0A )	N	0	1000	0	2
R03098	L-2-aminoadipate-6-semialdehyde:NAD(P)+ 6-oxidoreductase;ATP:L-2-aminoadipate 6-O-adenylyltransferase	[c] : C00956 + C00002 <==> C05560 + C00013	Lysine biosynthesis	Amino Acid Metabolism	1.2.1.31	( Unigene45632_A0A and Unigene24755_A0A )	N	0	1000	0	2
R03102	L-2-Aminoadipate-6-semialdehyde:NAD+ 6-oxidoreductase	[c] : C04076 + C00003 + C00001 <==> C00956 + C00004 + C00080	Lysine degradation	Amino Acid Metabolism	1.2.1.31	( Unigene45632_A0A and Unigene24755_A0A )	N	0	1000	0	2
R03103	L-2-Aminoadipate-6-semialdehyde:NADP+ 6-oxidoreductase	[c] : C04076 + C00006 + C00001 <==> C00956 + C00005 + C00080	Lysine degradation	Amino Acid Metabolism	1.2.1.31	( Unigene45632_A0A and Unigene24755_A0A )	N	0	1000	0	2
R03104	3-Mercaptolactate:NAD+ oxidoreductase	[c] : C00957 + C00004 + C00080 <==> C05823 + C00003	Cysteine and methionine metabolism	Amino Acid Metabolism	1.1.1.27	( Unigene20768_A0A and Unigene20767_A0A )	N	0	1000	0	2
R03105	3-Mercaptopyruvate:cyanide sulfurtransferase	[c] : C00957 + C00094 <==> C00320 + C00022	Cysteine and methionine metabolism	Amino Acid Metabolism	2.8.1.2	( Unigene19240_A0A and Unigene3247_A0A )	N	0	1000	0	2
R03146	Formate:ferricytochrome-b1 oxidoreductase	[c] : C00058 + 2 C00995 <==> C00011 + 2 C00998 + 2 C00080	Glyoxylate and dicarboxylate metabolism	Carbohydrate Metabolism	1.2.2.1		N	0	1000	0	1
R03157	formation of 3-Hydroxypropionyl-CoA	[c] : C01013 + C00010 + C00002 <==> C05668 + C00009 + C00008	Propanoate metabolism	Carbohydrate Metabolism	3.1.2.4;6.2.1.-	( Unigene27426_A0A and Unigene15193_A0A )	Y	-1000	1000	0	2
R03158	formation of 3-Hydroxypropionyl-CoA	[c] : C01013 + C00010 <==> C05668 + C00001	beta-Alanine metabolism	Metabolism of Other Amino Acids	3.1.2.4	( Unigene27426_A0A and Unigene15193_A0A )	Y	-1000	1000	0	2
R03161	ATP:6-deoxy-L-galactose 1-phosphotransferase	[c] : C00002 + C01019 <==> C00008 + C02985	Fructose and mannose metabolism	Carbohydrate Metabolism	2.7.1.52	Unigene3504_A0A	N	0	1000	0	2
R03165	Hydroxymethylbilane hydro-lyase(cyclizing)	[c] : C01024 <==> C01051 + C00001	Porphyrin and chlorophyll metabolism	Metabolism of Cofactors and Vitamins	4.2.1.75	Unigene30925_A0A	N	0	1000	0	2
R03166	formation of Uroporphyrinogen I	[c] : C01024 <==> C05766 + C00001	Porphyrin and chlorophyll metabolism	Metabolism of Cofactors and Vitamins			N	0	1000	0	1
R03167	glutathione:lipid-hydroperoxide oxidoreductase	[c] : C01025 + 2 C00051 <==> C01356 + C00127 + 2 C00001	Glutathione metabolism	Metabolism of Other Amino Acids	1.11.1.12	Unigene19103_A0A	N	0	1000	0	2
R03172	(S)-2-methylbutanoyl-CoA:acceptor 2,3-oxidoreductase	[c] : C15980 + C00028 <==> C03345 + C00030	Valine, leucine and isoleucine degradation	Amino Acid Metabolism	1.3.8.1;1.3.99.3;1.3.99.12	( ( Unigene53730_A0A ) or ( Unigene56370_A0A and Unigene5022_A0A ) or ( Unigene54425_A0A ) )	Y	-1000	1000	0	2
R03174	(S)-2-methylbutanoyl-CoA:enzyme N6-(dihydrolipoyl)lysine S-(2-methylbutanoyl)transferase	[c] : C00010 + C15979 <==> C15980 + C15973	Valine, leucine and isoleucine degradation	Amino Acid Metabolism	2.3.1.168	( Unigene55449_A0A and Unigene47340_A0A )	N	0	1000	0	2
R03180	4-Guanidinobutanamide amidohydrolase	[c] : C03078 + C00001 <==> C01035 + C00014	Arginine and proline metabolism	Amino Acid Metabolism	3.5.1.4	( Unigene14329_A0A and Unigene10776_A0A )	N	0	1000	0	2
R03181	4-Maleylacetoacetate cis-trans-isomerase	[c] : C01036 <==> C01061	Tyrosine metabolism	Amino Acid Metabolism	5.2.1.2	Unigene25280_A0A	N	0	1000	0	2
R03183	L-Gulono-1,4-lactone:NADP+ 1-oxidoreductase	[c] : C01040 + C00006 <==> C02670 + C00005 + C00080	Ascorbate and aldarate metabolism	Carbohydrate Metabolism	1.1.1.20		Y	-1000	1000	0	1
R03197	Uroporphyrinogen-III carboxy-lyase	[c] : C01051 <==> C03263 + 4 C00011	Porphyrin and chlorophyll metabolism	Metabolism of Cofactors and Vitamins	4.1.1.37	Unigene24592_A0A	N	0	1000	0	2
R03208	formation of O-(4-Hydroxy-3,5-diidophenyl)-3,5-diiodo-L-tyrosine	[c] : 2 C01060 + C00027 <==> C01829 + C02218 + 2 C00001	Tyrosine metabolism	Amino Acid Metabolism	1.11.1.8	( Unigene26027_A0A and Unigene9290_A0A and Unigene11197_A0A and Unigene46964_A0A and Unigene6901_A0A and Unigene27498_A0A and Unigene5661_A0A )	N	0	1000	0	2
R03220	Coproporphyrinogen:oxygen oxidoreductase(decarboxylating)	[c] : C03263 + C00007 <==> C01079 + 2 C00011 + 2 C00001	Porphyrin and chlorophyll metabolism	Metabolism of Cofactors and Vitamins	1.3.3.3		N	0	1000	0	1
R03222	protoporphyrinogen-IX:oxygen oxidoreductase	[c] : C01079 + 3 C00007 <==> C02191 + 3 C00027	Porphyrin and chlorophyll metabolism	Metabolism of Cofactors and Vitamins	1.3.3.4	( Unigene7386_A0A and Unigene22458_A0A )	N	0	1000	0	2
R03232	Protein-N(pai)-phosphohistidine:sugar N(pai)-phosphotransferase	[c] : C04261 + C00095 <==> C00615 + C01094	Fructose and mannose metabolism	Carbohydrate Metabolism	2.7.1.69		N	0	1000	0	1
R03236	ATP:D-tagatose-6-phosphate 1-phosphotransferase	[c] : C01097 + C00002 <==> C03785 + C00008	Galactose metabolism	Carbohydrate Metabolism	2.7.1.11;2.7.1.56;2.7.1.144	Unigene8597_A0A	Y	-1000	1000	0	2
R03237	CTP:D-Tagatose 6-phosphate 1-phosphotransferase	[c] : C00063 + C01097 <==> C00112 + C03785	Galactose metabolism	Carbohydrate Metabolism	2.7.1.11	Unigene8597_A0A	Y	-1000	1000	0	2
R03238	UTP:D-Tagatose 6-phosphate 1-phosphotransferase	[c] : C00075 + C01097 <==> C00015 + C03785	Galactose metabolism	Carbohydrate Metabolism	2.7.1.11	Unigene8597_A0A	Y	-1000	1000	0	2
R03239	ITP:D-Tagatose 6-phosphate 1-phosphotransferase	[c] : C00081 + C01097 <==> C00104 + C03785	Galactose metabolism	Carbohydrate Metabolism	2.7.1.11	Unigene8597_A0A	Y	-1000	1000	0	2
R03245	ATP:(R)-5-phosphomevalonate phosphotransferase	[c] : C00002 + C01107 <==> C00008 + C01143	Terpenoid backbone biosynthesis	Metabolism of Terpenoids and Polyketides	2.7.4.2		N	0	1000	0	1
R03249	formation of 5-Amino-2-oxopentanoic acid	[c] : C03564 + C00001 <==> C01110	Arginine and proline metabolism	Amino Acid Metabolism			N	0	1000	0	1
R03270	formation of [Dihydrolipoyllysine-residue acetyltransferase] S-acetyldihydrolipoyllysine	[c] : C05125 + C15972 <==> C16255 + C00068	Glycolysis / Gluconeogenesis	Carbohydrate Metabolism	1.2.4.1	( Unigene8216_A0A and Unigene56010_A0A and Unigene49156_A0A and Unigene40892_A0A ) or ( Unigene40891_A0A )	N	0	1000	0	2
R03283	4-Trimethylammoniobutanal:NAD+ 1-oxidoreductase;4-Trimethylammoniobutanal:NAD+ oxidoreductase	[c] : C01149 + C00003 + C00001 <==> C01181 + C00004 + C00080	Lysine degradation	Amino Acid Metabolism	1.2.1.3;1.2.1.47	( Unigene45813_A0A and Unigene25877_A0A and Unigene25916_A0A and Unigene48344_A0A and Unigene2472_A0A and Unigene27550_A0A and Unigene12647_A0A and Unigene45632_A0A and Unigene30385_A0A and Unigene56244_A0A and Unigene1690_A0A and Unigene24755_A0A and Unigene13946_A0A and Unigene33389_A0A and Unigene22602_A0A ) or ( Unigene48345_A0A )	N	0	1000	0	2
R03284	formation of 4-Trimethylammoniobutanal	[c] : C01259 <==> C01149 + C00037	Lysine degradation	Amino Acid Metabolism	4.1.2.-		N	0	1000	0	1
R03291	trans-4-Hydroxy-L-proline:NAD+ 5-oxidoreductase	[c] : C04281 + C00004 + C00080 <==> C01157 + C00003	Arginine and proline metabolism	Amino Acid Metabolism	1.5.1.2	( Unigene21277_A0A and Unigene32536_A0A )	N	0	1000	0	2
R03293	trans-4-Hydroxy-L-proline:NADP+ 5-oxidoreductase	[c] : C04281 + C00005 + C00080 <==> C01157 + C00006	Arginine and proline metabolism	Amino Acid Metabolism	1.5.1.2	( Unigene21277_A0A and Unigene32536_A0A )	N	0	1000	0	2
R03295	trans-4-Hydroxy-L-proline:(acceptor) oxidoreductase	[c] : C01157 + C00016 <==> C04281 + C01352	Arginine and proline metabolism	Amino Acid Metabolism	1.5.-.-	( Unigene38026_A0A ) or ( Unigene38210_A0A )	N	0	1000	0	2
R03296	trans-4-Hydroxy-L-proline 2-epimerase	[c] : C01157 <==> C03440	Arginine and proline metabolism	Amino Acid Metabolism	5.1.1.8		Y	-1000	1000	0	1
R03300	3,4-Dihydroxyphenylacetaldehyde:NAD+ oxidoreductase	[c] : C04043 + C00003 + C00001 <==> C01161 + C00004 + C00080	Tyrosine metabolism	Amino Acid Metabolism	1.2.1.5;1.2.1.29	( Unigene25877_A0A and Unigene2472_A0A ) or ( Unigene48345_A0A )	Y	-1000	1000	0	2
R03302	3,4-Dihydroxyphenylacetaldehyde:NADP+ oxidoreductase	[c] : C04043 + C00006 + C00001 <==> C01161 + C00005 + C00080	Tyrosine metabolism	Amino Acid Metabolism	1.2.1.5	( Unigene25877_A0A and Unigene2472_A0A ) or ( Unigene48345_A0A )	Y	-1000	1000	0	2
R03304	S-Adenosyl-L-methionine:catechol O-methyltransferase	[c] : C00019 + C01161 <==> C00021 + C05582	Tyrosine metabolism	Amino Acid Metabolism	2.1.1.6	Unigene25509_A0A	N	0	1000	0	2
R03310	5alpha-cholest-7-en-3beta-ol, NADH:oxygen 5-oxidoreductase	[c] : C01189 + C00004 + C00080 + C00007 <==> C01164 + C00003 + 2 C00001	Steroid biosynthesis	Lipid Metabolism	1.14.21.6	Unigene27721_A0A	N	0	1000	0	2
R03316	formation of [Dihydrolipoyllysine-residue succinyltransferase] S-succinyldihydrolipoyllysine	[c] : C05381 + C15972 <==> C16254 + C00068	Citrate cycle (TCA cycle)	Carbohydrate Metabolism	1.2.4.2	( Unigene9169_A0A and Unigene8310_A0A )	N	0	1000	0	2
R03321	beta-D-Glucose 6-phosphate ketol-isomerase	[c] : C01172 <==> C05345	Glycolysis / Gluconeogenesis	Carbohydrate Metabolism	5.3.1.9	( Unigene21101_A0A and Unigene48216_A0A ) or ( Unigene23661_A0A )	Y	-1000	1000	0	2
R03341	4-hydroxyphenylpyruvate carboxy-lyase	[c] : C01179 <==> C03765 + C00011	Tyrosine metabolism	Amino Acid Metabolism	4.1.1.80		N	0	1000	0	1
R03342	3-(4-Hydroxyphenyl)pyruvate keto-enol-isomerase	[c] : C01179 <==> C05350	Tyrosine metabolism	Amino Acid Metabolism	5.3.2.1	Unigene13081_A0A	Y	-1000	1000	0	2
R03346	Nicotinate D-ribonucleotide phosphohydrolase	[c] : C01185 + C00001 <==> C05841 + C00009	Nicotinate and nicotinamide metabolism	Metabolism of Cofactors and Vitamins	3.1.3.5	( Unigene49556_A0A and Unigene39746_A0A and Unigene11171_A0A and Unigene50486_A0A and Unigene24749_A0A and Unigene6641_A0A and Unigene38108_A0A and Unigene22160_A0A and Unigene43269_A0A )	Y	-1000	1000	0	2
R03353	5alpha-Cholest-7-en-3beta-ol delta7-delta8-isomerase	[c] : C03845 <==> C01189	Steroid biosynthesis	Lipid Metabolism	5.3.3.5		N	0	1000	0	1
R03355	beta-D-Galactosyl-1,4-beta-D-glucosylceramide galactohydrolase	[c] : C01290 + C00001 <==> C01190 + C00124	Sphingolipid metabolism	Lipid Metabolism	3.2.1.23	( Unigene34401_A0A and Unigene52557_A0A and Unigene42262_A0A ) or ( Unigene32446_A0A and Unigene3372_A0A )	N	0	1000	0	2
R03360	1-Phosphatidyl-D-myo-inositol 2-acylhydrolase	[c] : C01194 + C00001 <==> C03819 + C00060	Glycerophospholipid metabolism	Lipid Metabolism	3.1.1.52		N	0	1000	0	1
R03361	ATP:1-Phosphatidyl-1D-myo-inositol 4-phosphotransferase	[c] : C00002 + C01194 <==> C00008 + C01277	Inositol phosphate metabolism	Carbohydrate Metabolism	2.7.1.67	( Unigene12988_A0A and Unigene56703_A0A and Unigene56168_A0A and Unigene54769_A0A and Unigene16878_A0A and Unigene27945_A0A and Unigene2398_A0A and Unigene30324_A0A and Unigene6601_A0A and Unigene4871_A0A and Unigene28161_A0A and Unigene35637_A0A and Unigene5578_A0A and Unigene38807_A0A and Unigene15495_A0A and Unigene29040_A0A and Unigene12333_A0A ) or ( Unigene52195_A0A )	N	0	1000	0	2
R03362	ATP:1-phosphatidyl-1D-myo-inositol 3-phosphotransferase	[c] : C00002 + C01194 <==> C00008 + C04549	Inositol phosphate metabolism	Carbohydrate Metabolism	2.7.1.137	( Unigene34417_A0A and Unigene15872_A0A )	N	0	1000	0	2
R03366	S-Adenosyl-L-methionine:3,4-dihydroxy-trans-cinnamate 3-O-methyltransferase	[c] : C00019 + C01197 <==> C00021 + C01494	Phenylpropanoid biosynthesis	Biosynthesis of Other Secondary Metabolites	2.1.1.68		N	0	1000	0	1
R03376	Protein lysine,2-oxoglutarate:oxygen oxidoreductase (5-hydroxylating)	[c] : C02188 + C00026 + C00007 <==> C01211 + C00042 + C00011 + C00001	Lysine degradation	Amino Acid Metabolism	1.14.11.4	( Unigene53483_A0A and Unigene54855_A0A )	N	0	1000	0	2
R03380	UDPgalactose:procollagen-5-hydroxy-L-lysine D-galactosyltransferase	[c] : C00052 + C01211 <==> C00015 + C04487	Lysine degradation	Amino Acid Metabolism	2.4.1.50	( Unigene42024_A0A and Unigene13573_A0A and Unigene4889_A0A and Unigene53483_A0A and Unigene54855_A0A )	N	0	1000	0	2
R03393	D-myo-Inositol-1,4-bisphosphate 1-phosphohydrolase	[c] : C01220 + C00001 <==> C03546 + C00009	Inositol phosphate metabolism	Carbohydrate Metabolism	3.1.3.57		N	0	1000	0	2
R03394	D-myo-Inositol-1,4,5-trisphosphate 5-phosphohydrolase	[c] : C01245 + C00001 <==> C01220 + C00009	Inositol phosphate metabolism	Carbohydrate Metabolism	3.1.3.56	( Unigene50793_A0A and Unigene44995_A0A and Unigene47468_A0A and Unigene15004_A0A and Unigene42169_A0A and Unigene12593_A0A and Unigene31875_A0A )	N	0	1000	0	2
R03403	3beta-Hydroxyandrost-5-en-17-one acetaldehyde-lyase	[c] : C05138 + C00005 + C00007 + C00080 <==> C01227 + C00006 + C00033 + C00001	Steroid hormone biosynthesis	Lipid Metabolism	4.1.2.30		N	0	1000	0	1
R03408	formation of 16alpha-Hydroxydehydroepiandrosterone	[c] : C01227 + C00080 + C00007 + C00005 <==> C05139 + C00006 + C00001	Steroid hormone biosynthesis	Lipid Metabolism	1.14.14.1	( CL367.Contig1_A0A and CL1618.Contig1_A0A and Unigene37775_A0A and Unigene28120_A0A and Unigene48800_A0A and Unigene20529_A0A and Unigene25620_A0A ) or ( Unigene20555_A0A )	N	0	1000	0	2
R03409	guanosine 3'-diphosphate 5'-triphosphate 5'-phosphohydrolase	[c] : C04494 + C00001 <==> C01228 + C00009	Purine metabolism	Nucleotide Metabolism	3.6.1.11;3.6.1.40	Unigene2475_A0A	Y	-1000	1000	0	2
R03415	1-(1-Alkenyl)-sn-glycero-3-phosphoethanolamine aldehydohydrolase	[c] : C00071 + C01233 <==> C04635 + C00001	Ether lipid metabolism	Lipid Metabolism	3.3.2.5		N	0	1000	0	1
R03416	1-Acyl-sn-glycero-3-phosphoethanolamine aldehydohydrolase	[c] : C04438 + C00001 <==> C00162 + C01233	Glycerophospholipid metabolism	Lipid Metabolism	3.1.1.5	( Unigene54632_A0A and Unigene34258_A0A and Unigene33536_A0A and Unigene42382_A0A and Unigene31684_A0A )	N	0	1000	0	2
R03417	L-2-Lysophosphatidylethanolamine aldehydohydrolase	[c] : C05973 + C00001 <==> C00162 + C01233	Glycerophospholipid metabolism	Lipid Metabolism	3.1.1.5	( Unigene8411_A0A and Unigene54632_A0A and Unigene34258_A0A and Unigene33536_A0A and Unigene42382_A0A and Unigene31684_A0A )	N	0	1000	0	2
R03425	glycine:lipoylprotein oxidoreductase (decarboxylating and acceptor-aminomethylating)	[c] : C00037 + C02051 <==> C01242 + C00011	Glycine, serine and threonine metabolism	Amino Acid Metabolism	1.4.4.2	( Unigene50212_A0A and Unigene10041_A0A and Unigene38191_A0A and Unigene42272_A0A )	N	0	1000	0	2
R03427	D-myo-Inositol 1,3,4-trisphosphate 1-phosphohydrolase	[c] : C01243 + C00001 <==> C04063 + C00009	Inositol phosphate metabolism	Carbohydrate Metabolism	3.1.3.57		N	0	1000	0	2
R03428	ATP:1D-myo-inositol-1,3,4-trisphosphate 5-phosphotransferase	[c] : C00002 + C01243 <==> C00008 + C01272	Inositol phosphate metabolism	Carbohydrate Metabolism	2.7.1.159	( Unigene50403_A0A and Unigene27909_A0A and Unigene43703_A0A )	N	0	1000	0	2
R03429	ATP:1D-myo-inositol-1,3,4-trisphosphate 6-phosphotransferase	[c] : C00002 + C01243 <==> C00008 + C04477	Inositol phosphate metabolism	Carbohydrate Metabolism	2.7.1.159	( Unigene50403_A0A and Unigene27909_A0A and Unigene43703_A0A )	N	0	1000	0	2
R03430	D-myo-Inositol 1,3,4,5-tetrakisphosphate 5-phosphohydrolase	[c] : C01272 + C00001 <==> C01243 + C00009	Inositol phosphate metabolism	Carbohydrate Metabolism	3.1.3.56	( Unigene50793_A0A and Unigene44995_A0A and Unigene47468_A0A and Unigene15004_A0A and Unigene42169_A0A and Unigene12593_A0A and Unigene31875_A0A )	N	0	1000	0	2
R03433	ATP:1D-myo-inositol-1,4,5-trisphosphate 3-phosphotransferase	[c] : C00002 + C01245 <==> C00008 + C01272	Inositol phosphate metabolism	Carbohydrate Metabolism	2.7.1.127	( Unigene31597_A0A and Unigene47317_A0A and Unigene35823_A0A and Unigene36818_A0A and Unigene43120_A0A and Unigene4841_A0A )	N	0	1000	0	2
R03434	D-myo-Inositol 1,3,4,5-tetrakisphosphate 3-phosphohydrolase	[c] : C01272 + C00001 <==> C01245 + C00009	Inositol phosphate metabolism	Carbohydrate Metabolism	3.1.3.62	( Unigene5216_A0A and Unigene6099_A0A )	N	0	1000	0	2
R03435	1-Phosphatidyl-1D-myo-inositol-4,5-bisphosphate inositoltrisphosphohydrolase	[c] : C04637 + C00001 <==> C01245 + C00641	Inositol phosphate metabolism	Carbohydrate Metabolism	3.1.4.11	( Unigene12604_A0A and Unigene31387_A0A and Unigene43184_A0A and Unigene29080_A0A and Unigene42046_A0A and Unigene29469_A0A and Unigene27252_A0A and Unigene55815_A0A and Unigene10181_A0A and Unigene41203_A0A and Unigene54809_A0A and Unigene40630_A0A and Unigene15466_A0A and Unigene51305_A0A and Unigene50628_A0A and Unigene11485_A0A ) or ( Unigene15553_A0A )	N	0	1000	0	2
R03437	Acetyl-CoA:1-alkyl-sn-glycero-3-phosphocholine 2-O-acetyltransferase	[c] : C00024 + C04317 <==> C00010 + C04598	Ether lipid metabolism	Lipid Metabolism	2.3.1.67	( Unigene40212_A0A and Unigene41805_A0A and Unigene18276_A0A )	N	0	1000	0	2
R03451	N6,N6,N6-Trimethyl-L-lysine,2-oxoglutarate:oxygen oxidoreductase (3-hydroxylating)	[c] : C03793 + C00026 + C00007 <==> C01259 + C00042 + C00011	Lysine degradation	Amino Acid Metabolism	1.14.11.8	( Unigene35666_A0A and Unigene42637_A0A and Unigene47558_A0A and Unigene23715_A0A )	N	0	1000	0	2
R03469	ATP:1-phosphatidyl-1D-myo-inositol-4-phosphate 5-phosphotransferase	[c] : C00002 + C01277 <==> C00008 + C04637	Inositol phosphate metabolism	Carbohydrate Metabolism	2.7.1.68	( Unigene45974_A0A and Unigene46115_A0A and Unigene41089_A0A and Unigene16782_A0A and Unigene45034_A0A )	N	0	1000	0	2
R03478	ATP:1D-myo-inositol-1,3,4,6-tetrakisphosphate 5-phosphotransferase	[c] : C00002 + C04477 <==> C00008 + C01284	Inositol phosphate metabolism	Carbohydrate Metabolism	2.7.1.140		N	0	1000	0	1
R03479	ATP:1D-myo-inositol-3,4,5,6-tetrakisphosphate 1-phosphotransferase	[c] : C00002 + C04520 <==> C00008 + C01284	Inositol phosphate metabolism	Carbohydrate Metabolism	2.7.1.134	( Unigene50403_A0A and Unigene27909_A0A and Unigene43703_A0A )	Y	-1000	1000	0	2
R03522	RX:glutathione R-transferase	[c] : C01322 + C00051 <==> C00462 + C02320	Glutathione metabolism	Metabolism of Other Amino Acids	2.5.1.18	( Unigene19265_A0A and Unigene20954_A0A and Unigene20526_A0A and Unigene25462_A0A and Unigene8197_A0A and Unigene9592_A0A and Unigene39496_A0A and Unigene48309_A0A and Unigene49719_A0A and Unigene42745_A0A and Unigene30993_A0A and Unigene29077_A0A and Unigene56349_A0A ) or ( Unigene12031_A0A )	N	0	1000	0	2
R03530	ATP:dIDP phosphotransferase	[c] : C00002 + C01344 <==> C00008 + C01345	Purine metabolism	Nucleotide Metabolism	2.7.4.6	( Unigene21044_A0A and Unigene16902_A0A and Unigene26862_A0A and Unigene43803_A0A and Unigene36433_A0A )	Y	-1000	1000	0	2
R03534	2-Hydroxyglutarate:(acceptor) 2-oxidoreductase	[c] : C00026 + C01352 <==> C02630 + C00016	Butanoate metabolism	Carbohydrate Metabolism	1.1.99.2	( Unigene28773_A0A and Unigene10153_A0A )	N	0	1000	0	2
R03539	formation of 3-Iodo-L-tyrosine	[c] : C01382 + C00082 <==> C05590 + C02515	Tyrosine metabolism	Amino Acid Metabolism	1.11.1.8	( Unigene26027_A0A and Unigene9290_A0A and Unigene11197_A0A and Unigene46964_A0A and Unigene6901_A0A and Unigene27498_A0A and Unigene5661_A0A )	N	0	1000	0	2
R03595	ATP:selenide, water phosphotransferase	[c] : C00002 + C01528 + C00001 <==> C00020 + C05172 + C00009	Selenocompound metabolism	Metabolism of Other Amino Acids	2.7.9.3	Unigene45460_A0A	Y	-1000	1000	0	2
R03596	Hydrogen selenide:NADP+ oxidoreductase	[c] : C05684 + 3 C00005 + 5 C00080 <==> C01528 + 3 C00006 + 3 C00001	Selenocompound metabolism	Metabolism of Other Amino Acids	1.8.1.9	( Unigene30625_A0A and Unigene13908_A0A and Unigene15237_A0A )	N	0	1000	0	2
R03599	L-selenocysteine selenide-lyase (L-alanine-forming)	[c] : C05688 + C00030 <==> C01528 + C00041 + C00028	Selenocompound metabolism	Metabolism of Other Amino Acids	4.4.1.16	Unigene39029_A0A	Y	-1000	1000	0	2
R03610	calcidiol,NADPH:oxygen oxidoreductase (1-hydroxylating)	[c] : C01561 + C00007 + C00005 + C00080 <==> C01673 + C00006 + C00001	Steroid biosynthesis	Lipid Metabolism	1.14.13.13	Unigene45919_A0A	N	0	1000	0	2
R03617	D-galactosyl-N-acylsphingosine galactohydrolase	[c] : C02686 + C00001 <==> C00124 + C00195	Sphingolipid metabolism	Lipid Metabolism	3.2.1.46;3.2.1.62		N	0	1000	0	1
R03646	L-Arginine:tRNA(Arg) ligase (AMP-forming)	[c] : C00002 + C00062 + C01636 <==> C00020 + C00013 + C02163	Aminoacyl-tRNA biosynthesis	Translation	6.1.1.19	( Unigene50886_A0A and Unigene1645_A0A )	N	0	1000	0	2
R03647	L-Aspartate:tRNAAsp ligase (AMP-forming)	[c] : C00002 + C00049 + C01637 <==> C00020 + C00013 + C06113	Aminoacyl-tRNA biosynthesis	Translation	6.1.1.23		N	0	1000	0	1
R03648	L-Asparagine:tRNA(Asn) ligase (AMP-forming)	[c] : C00002 + C00152 + C01637 <==> C00020 + C00013 + C03402	Aminoacyl-tRNA biosynthesis	Translation	6.1.1.22	( Unigene17558_A0A and Unigene8923_A0A and Unigene8924_A0A and Unigene8925_A0A ) or ( Unigene21976_A0A )	N	0	1000	0	2
R03650	L-Cysteine:tRNA(Cys) ligase (AMP-forming)	[c] : C00002 + C00097 + C01639 <==> C00020 + C00013 + C03125	Aminoacyl-tRNA biosynthesis	Translation	6.1.1.16	( Unigene40874_A0A and Unigene14890_A0A and Unigene36413_A0A and Unigene54917_A0A and Unigene12327_A0A and Unigene1574_A0A )	N	0	1000	0	2
R03652	L-Glutamine:tRNA(Gln) ligase (AMP-forming)	[c] : C00002 + C00064 + C01640 <==> C00020 + C00013 + C02282	Aminoacyl-tRNA biosynthesis	Translation	6.1.1.18	( Unigene12966_A0A and Unigene5454_A0A and Unigene3396_A0A and Unigene56236_A0A )	N	0	1000	0	2
R03654	glycine:tRNA(Gly) ligase (AMP-forming)	[c] : C00002 + C00037 + C01642 <==> C00020 + C00013 + C02412	Aminoacyl-tRNA biosynthesis	Translation	6.1.1.14	( Unigene26133_A0A and Unigene10092_A0A and Unigene53168_A0A and Unigene3825_A0A and Unigene33454_A0A )	N	0	1000	0	2
R03655	L-Histidine:tRNA(His) ligase (AMP-forming)	[c] : C00002 + C00135 + C01643 <==> C00020 + C00013 + C02988	Aminoacyl-tRNA biosynthesis	Translation	6.1.1.21	( Unigene31459_A0A and Unigene22492_A0A )	N	0	1000	0	2
R03656	L-Isoleucine:tRNA(Ile) ligase (AMP-forming)	[c] : C00002 + C00407 + C01644 <==> C00020 + C00013 + C03127	Valine, leucine and isoleucine biosynthesis	Amino Acid Metabolism	6.1.1.5	( Unigene14155_A0A and Unigene27860_A0A and Unigene33585_A0A and Unigene38824_A0A ) or ( Unigene46549_A0A )	N	0	1000	0	2
R03657	L-Leucine:tRNA(Leu) ligase (AMP-forming)	[c] : C00002 + C00123 + C01645 <==> C00020 + C00013 + C02047	Valine, leucine and isoleucine biosynthesis	Amino Acid Metabolism	6.1.1.4	( Unigene13001_A0A and Unigene2628_A0A and Unigene36283_A0A and Unigene28732_A0A and Unigene40254_A0A and Unigene47801_A0A and Unigene39265_A0A and Unigene52409_A0A )	N	0	1000	0	2
R03658	L-Lysine:tRNALys ligase (AMP-forming)	[c] : C00002 + C00047 + C01646 <==> C00020 + C00013 + C01931	Aminoacyl-tRNA biosynthesis	Translation	6.1.1.6	( Unigene45614_A0A and Unigene50235_A0A and Unigene17125_A0A and Unigene17124_A0A ) or ( Unigene51733_A0A )	N	0	1000	0	2
R03659	L-Methionine:tRNAMet ligase (AMP-forming)	[c] : C00002 + C00073 + C01647 <==> C00020 + C00013 + C02430	Aminoacyl-tRNA biosynthesis	Translation	6.1.1.10	( Unigene26724_A0A and Unigene50489_A0A and Unigene18150_A0A and Unigene22733_A0A and Unigene53072_A0A and Unigene12890_A0A )	N	0	1000	0	2
R03660	L-Phenylalanine:tRNA(Ala) ligase (AMP-forming)	[c] : C00002 + C00079 + C01648 <==> C00020 + C00013 + C03511	Aminoacyl-tRNA biosynthesis	Translation	6.1.1.20	( Unigene5244_A0A and Unigene29691_A0A and Unigene52430_A0A and Unigene23167_A0A and Unigene12689_A0A and Unigene11941_A0A and Unigene47658_A0A and Unigene22166_A0A )	N	0	1000	0	2
R03661	L-proline:tRNA(Pro) ligase (AMP-forming)	[c] : C00002 + C00148 + C01649 <==> C00020 + C00013 + C02702	Aminoacyl-tRNA biosynthesis	Translation	6.1.1.15	( Unigene24613_A0A and Unigene25679_A0A and Unigene30563_A0A and Unigene55538_A0A and Unigene3329_A0A and Unigene3330_A0A and Unigene42070_A0A and Unigene46161_A0A and Unigene53072_A0A and Unigene39076_A0A and Unigene24516_A0A and Unigene3575_A0A ) or ( Unigene10193_A0A and Unigene43233_A0A )	N	0	1000	0	2
R03662	L-Serine:tRNA(Ser) ligase (AMP-forming)	[c] : C00002 + C00065 + C01650 <==> C00020 + C00013 + C02553	Aminoacyl-tRNA biosynthesis	Translation	6.1.1.11	( Unigene53874_A0A and Unigene28835_A0A and Unigene55283_A0A and Unigene38112_A0A and Unigene15349_A0A and Unigene3385_A0A )	N	0	1000	0	2
R03663	L-Threonine:tRNA(Thr) ligase (AMP-forming)	[c] : C00002 + C00188 + C01651 <==> C00020 + C00013 + C02992	Aminoacyl-tRNA biosynthesis	Translation	6.1.1.3	( Unigene2579_A0A and Unigene44894_A0A and Unigene29624_A0A and Unigene4430_A0A )	N	0	1000	0	2
R03664	L-Tryptophan -tRNA(Trp) ligase (AMP-forming)	[c] : C00002 + C00078 + C01652 <==> C00020 + C00013 + C03512	Tryptophan metabolism	Amino Acid Metabolism	6.1.1.2	( Unigene56111_A0A and Unigene55316_A0A and Unigene1391_A0A ) or ( Unigene24452_A0A )	N	0	1000	0	2
R03665	L-Valine:tRNAVal ligase (AMP-forming)	[c] : C00002 + C00183 + C01653 <==> C00020 + C00013 + C02554	Valine, leucine and isoleucine biosynthesis	Amino Acid Metabolism	6.1.1.9	( Unigene17234_A0A and Unigene44694_A0A and Unigene11116_A0A and Unigene5809_A0A and Unigene44695_A0A ) or ( Unigene19649_A0A )	N	0	1000	0	2
R03689	lanosterol delta24-reductase	[c] : C01724 + C00005 + C00080 <==> C05109 + C00006	Steroid biosynthesis	Lipid Metabolism	1.3.1.72	( Unigene13969_A0A and Unigene16196_A0A and Unigene42624_A0A )	Y	-1000	1000	0	2
R03697	formation of Morphine	[c] : C06174 + C03024 + C00007 <==> C01516 + C03161 + C00067 + C00001	Drug metabolism - cytochrome P450	Xenobiotics Biodegradation and Metabolism	1.14.14.1	( Unigene56756_A0A and Unigene53088_A0A )	N	0	1000	0	2
R03719	3alpha,7alpha,12alpha-trihydroxy-5beta-cholanoyl-CoA:propanoyl-CoA C-acyltransferase;choloyl-CoA:propanoyl-CoA C-acyltransferase	[c] : C00010 + C05467 <==> C00100 + C01794	Primary bile acid biosynthesis	Lipid Metabolism	2.3.1.176	( Unigene8110_A0A and Unigene50687_A0A and Unigene26032_A0A and Unigene52075_A0A )	N	0	1000	0	2
R03724	formation of Desmosterol	[c] : C05107 + C00030 <==> C01802 + C00028	Steroid biosynthesis	Lipid Metabolism			N	0	1000	0	1
R03751	epsilon-Caprolactone lactonohydrolase	[c] : C01880 + C00001 <==> C06103	Caprolactam degradation	Xenobiotics Biodegradation and Metabolism	3.1.1.17	( Unigene45363_A0A and Unigene26891_A0A ) or ( Unigene56862_A0A )	N	0	1000	0	2
R03776	trans-Oct-2-enoyl-CoA reductase	[c] : C05276 + C00005 + C00080 <==> C01944 + C00006	Fatty acid elongation in mitochondria	Lipid Metabolism	1.3.1.8;1.3.1.38	( Unigene28257_A0A and Unigene41946_A0A and Unigene52592_A0A )	N	0	1000	0	2
R03777	Octanoyl-CoA:oxygen 2-oxidoreductase	[c] : C01944 + C00016 <==> C05276 + C01352	Fatty acid metabolism	Lipid Metabolism	1.3.3.6;1.3.99.3;1.3.99.13;1.3.99.-	( Unigene16412_A0A and Unigene41487_A0A and Unigene37402_A0A and Unigene52196_A0A and Unigene46557_A0A and Unigene32260_A0A and Unigene22825_A0A and Unigene37932_A0A and Unigene56956_A0A ) or ( Unigene54425_A0A and Unigene49345_A0A and Unigene53730_A0A and Unigene17535_A0A and Unigene43336_A0A )	N	0	1000	0	2
R03778	Octanoyl-CoA:acetyl-CoA C-acyltransferase	[c] : C01944 + C00024 <==> C00010 + C05265	Fatty acid elongation in mitochondria	Lipid Metabolism	2.3.1.16	Unigene45487_A0A	N	0	1000	0	2
R03814	Linoleoyl-CoA, hydrogen-donor:oxygen oxidoreductase	[c] : C02050 + C00030 + C00007 <==> C03035 + C00028 + 2 C00001	Biosynthesis of unsaturated fatty acids	Lipid Metabolism	1.14.19.3		N	0	1000	0	1
R03815	dihydrolipoylprotein:NAD+ oxidoreductase	[c] : C02972 + C00003 <==> C02051 + C00004 + C00080	Glycine, serine and threonine metabolism	Amino Acid Metabolism	1.8.1.4	( Unigene46201_A0A and Unigene52343_A0A )	N	0	1000	0	2
R03848	Corticosterone:NADP+ 11-oxidoreductase	[c] : C02140 + C00006 <==> C05490 + C00005 + C00080	Steroid hormone biosynthesis	Lipid Metabolism	1.1.1.146;1.1.1.-	Unigene4816_A0A	N	0	1000	0	2
R03856	trans-Dodec-2-enoyl-CoA reductase	[c] : C03221 + C00005 + C00080 <==> C01832 + C00006	Fatty acid elongation in mitochondria	Lipid Metabolism	1.3.1.8;1.3.1.38	( Unigene28257_A0A and Unigene41946_A0A and Unigene52592_A0A )	N	0	1000	0	2
R03857	Lauroyl-CoA:(acceptor) 2,3-oxidoreductase	[c] : C01832 + C00016 <==> C03221 + C01352	Fatty acid metabolism	Lipid Metabolism	1.3.3.6;1.3.99.3;1.3.99.13;1.3.99.-	( Unigene16412_A0A and Unigene41487_A0A and Unigene37402_A0A and Unigene52196_A0A and Unigene46557_A0A and Unigene32260_A0A and Unigene22825_A0A and Unigene37932_A0A and Unigene56956_A0A ) or ( Unigene54425_A0A and Unigene49345_A0A and Unigene53730_A0A and Unigene17535_A0A and Unigene43336_A0A )	N	0	1000	0	2
R03858	Lauroyl-CoA:acetyl-CoA C-acyltransferase	[c] : C01832 + C00024 <==> C00010 + C05261	Fatty acid elongation in mitochondria	Lipid Metabolism	2.3.1.16	Unigene45487_A0A	N	0	1000	0	2
R03867	(5-Glutamyl)-peptide:amino-acid 5-glutamyltransferase	[c] : C02166 + C00045 <==> C05951 + C03363	Arachidonic acid metabolism	Lipid Metabolism	2.3.2.2	( Unigene9404_A0A and Unigene45196_A0A )	N	0	1000	0	2
R03869	(S)-Methylmalonate semialdehyde:NAD+ oxidoreductase	[c] : C06002 + C00003 + C00001 <==> C02170 + C00004 + C00080	Valine, leucine and isoleucine degradation	Amino Acid Metabolism	1.2.1.3	( Unigene45813_A0A and Unigene25877_A0A and Unigene25916_A0A and Unigene48344_A0A and Unigene2472_A0A and Unigene27550_A0A and Unigene12647_A0A and Unigene45632_A0A and Unigene30385_A0A and Unigene56244_A0A and Unigene1690_A0A and Unigene24755_A0A and Unigene13946_A0A and Unigene33389_A0A and Unigene22602_A0A ) or ( Unigene48345_A0A )	N	0	1000	0	2
R03875	formation of Protein N6-methyl-L-lysine	[c] : C02188 + C00019 <==> C05544 + C00021	Lysine degradation	Amino Acid Metabolism	2.1.1.43;2.1.1.59;2.1.1.60	( Unigene20922_A0A and Unigene20204_A0A and Unigene47997_A0A and Unigene20923_A0A and Unigene48376_A0A and Unigene40373_A0A and Unigene25304_A0A and Unigene46373_A0A and Unigene49522_A0A and Unigene39840_A0A and CL429.Contig1_A0A and Unigene14482_A0A and Unigene20203_A0A and Unigene7912_A0A and Unigene5397_A0A and Unigene644_A0A and Unigene25027_A0A and Unigene39580_A0A and Unigene44954_A0A and U…	N	0	1000	0	2
R03905	Glu-tRNA(Gln):L-glutamine amido-ligase(ADP-forming)	[c] : C02282 + C00025 + C00009 + C00008 <==> C06112 + C00064 + C00002 + C00001	Aminoacyl-tRNA biosynthesis	Translation	6.3.5.7	( Unigene14329_A0A and Unigene6029_A0A )	N	0	1000	0	2
R03909	Monocarboxylic acid amide amidohydrolase	[c] : C03620 + C00001 <==> C00060 + C00014	Cyanoamino acid metabolism	Metabolism of Other Amino Acids	3.5.1.4	( Unigene14329_A0A and Unigene10776_A0A )	N	0	1000	0	2
R03915	glutathione:protein-disulfide oxidoreductase	[c] : C02582 + 2 C00051 <==> C02315 + C00127	Glutathione metabolism	Metabolism of Other Amino Acids	1.8.4.2	( Unigene24825_A0A and Unigene3847_A0A )	N	0	1000	0	2
R03916	(5-Glutamyl)-peptide:amino-acid 5-glutamyltransferase	[c] : C02320 + C00001 <==> C05729 + C00025	Glutathione metabolism	Metabolism of Other Amino Acids	2.3.2.2	( Unigene9404_A0A and Unigene45196_A0A )	N	0	1000	0	2
R03919	Donor:hydrogen-peroxide oxidoreductase	[c] : C02325 <==> C15806	Phenylpropanoid biosynthesis	Biosynthesis of Other Secondary Metabolites	1.11.1.7	Unigene20461_A0A	N	0	1000	0	2
R03920	ATP:D-fructose 6-phosphotransferase	[c] : C00002 + C02336 <==> C00008 + C05345	Starch and sucrose metabolism	Carbohydrate Metabolism	2.7.1.1;2.7.1.4	( Unigene55974_A0A and Unigene47170_A0A and Unigene33700_A0A and Unigene9255_A0A )	Y	-1000	1000	0	2
R03933	20alpha,22beta-Dihydroxycholesterol,ferredoxin:oxygen oxidoreductase (side-chain-cleaving)	[c] : C05501 + C00007 + 2 C00662 + 2 C00080 <==> C02373 + C01953 + 2 C00001 + 2 C00667	Steroid hormone biosynthesis	Lipid Metabolism	1.14.15.6	Unigene45215_A0A	N	0	1000	0	2
R03953	formation of Triiodothyronine	[c] : C02515 + C01060 + C00027 <==> C02465 + C02218 + 2 C00001	Tyrosine metabolism	Amino Acid Metabolism	1.11.1.8	( Unigene26027_A0A and Unigene9290_A0A and Unigene11197_A0A and Unigene46964_A0A and Unigene6901_A0A and Unigene27498_A0A and Unigene5661_A0A )	N	0	1000	0	2
R03970	(5-Glutamyl)-peptide:amino-acid 5-glutamyltransferase	[c] : C02512 + C00025 <==> C05711 + C00001	Cyanoamino acid metabolism	Metabolism of Other Amino Acids	2.3.2.2	( Unigene9404_A0A and Unigene45196_A0A )	N	0	1000	0	2
R03971	gamma-Glutamyl-beta-aminopropiononitrile amidohydrolase	[c] : C05670 + C00025 <==> C06114 + C00001	Cyanoamino acid metabolism	Metabolism of Other Amino Acids	2.3.2.2	( Unigene9404_A0A and Unigene45196_A0A )	N	0	1000	0	2
R03973	formation of 3,5-Diiodo-L-tyrosine	[c] : C02515 + C01382 <==> C05590 + C01060	Tyrosine metabolism	Amino Acid Metabolism	1.11.1.8	( Unigene26027_A0A and Unigene9290_A0A and Unigene11197_A0A and Unigene46964_A0A and Unigene6901_A0A and Unigene27498_A0A and Unigene5661_A0A )	N	0	1000	0	2
R03989	trans-Tetradec-2-enoyl-CoA reductase	[c] : C05273 + C00005 + C00080 <==> C02593 + C00006	Fatty acid elongation in mitochondria	Lipid Metabolism	1.3.1.8;1.3.1.38	( Unigene28257_A0A and Unigene41946_A0A and Unigene52592_A0A )	N	0	1000	0	2
R03990	Tetradecanoyl-CoA:(acceptor) 2,3-oxidoreductase	[c] : C02593 + C00016 <==> C05273 + C01352	Fatty acid metabolism	Lipid Metabolism	1.3.3.6;1.3.99.3;1.3.99.13;1.3.99.-	( Unigene16412_A0A and Unigene41487_A0A and Unigene37402_A0A and Unigene52196_A0A and Unigene46557_A0A and Unigene32260_A0A and Unigene22825_A0A and Unigene37932_A0A and Unigene56956_A0A ) or ( Unigene54425_A0A and Unigene49345_A0A and Unigene53730_A0A and Unigene17535_A0A and Unigene43336_A0A )	N	0	1000	0	2
R03991	myristoyl-CoA:acetylCoA C-myristoyltransferase	[c] : C02593 + C00024 <==> C00010 + C05259	Fatty acid elongation in mitochondria	Lipid Metabolism	2.3.1.16;2.3.1.155	Unigene45487_A0A	N	0	1000	0	2
R04007	Donor:hydrogen-peroxide oxidoreductase	[c] : C02646 <==> C15804	Phenylpropanoid biosynthesis	Biosynthesis of Other Secondary Metabolites	1.11.1.7	Unigene20461_A0A	N	0	1000	0	2
R04014	dodecanoyl-[acyl-carrier-protein] hydrolase	[c] : C05223 + C00001 <==> C00229 + C02679	Fatty acid biosynthesis	Lipid Metabolism			N	0	1000	0	2
R04016	formation of Digalactosylceramide	[c] : C02686 + C00052 <==> C06126 + C00015	Sphingolipid metabolism	Lipid Metabolism	2.4.1.-		N	0	1000	0	1
R04017	3'-Phosphoadenylylsulfate:galactosylceramide 3'-sulfotransferase	[c] : C00053 + C02686 <==> C00054 + C06125	Sphingolipid metabolism	Lipid Metabolism	2.8.2.11	Unigene37461_A0A	Y	-1000	1000	0	2
R04019	Digalactosylceramide galactohydrolase	[c] : C06126 + C00001 <==> C02686 + C00124	Sphingolipid metabolism	Lipid Metabolism	3.2.1.22		N	0	1000	0	1
R04065	Imidazole acetaldehyde:NAD+ oxidoreductase	[c] : C05130 + C00003 + C00001 <==> C02835 + C00004 + C00080	Histidine metabolism	Amino Acid Metabolism	1.2.1.3	( Unigene45813_A0A and Unigene25877_A0A and Unigene25916_A0A and Unigene48344_A0A and Unigene2472_A0A and Unigene27550_A0A and Unigene12647_A0A and Unigene45632_A0A and Unigene30385_A0A and Unigene56244_A0A and Unigene1690_A0A and Unigene24755_A0A and Unigene13946_A0A and Unigene33389_A0A and Unigene22602_A0A ) or ( Unigene48345_A0A )	N	0	1000	0	2
R04095	3-Methylbutanoyl-CoA:(acceptor) 2,3-oxidoreductase	[c] : C02939 + C00016 <==> C03069 + C01352	Valine, leucine and isoleucine degradation	Amino Acid Metabolism	1.3.99.3;1.3.99.10	( Unigene54425_A0A and Unigene20469_A0A and Unigene7429_A0A and Unigene53730_A0A and Unigene13234_A0A )	Y	-1000	1000	0	2
R04097	3-methylbutanoyl-CoA:enzyme N6-(dihydrolipoyl)lysine S-(3-methylbutanoyl)transferase	[c] : C00010 + C15975 <==> C02939 + C15973	Valine, leucine and isoleucine degradation	Amino Acid Metabolism	2.3.1.168	( Unigene55449_A0A and Unigene47340_A0A )	N	0	1000	0	2
R04125	S-aminomethyldihydrolipoylprotein:(6S)-tetrahydrofolate aminomethyltransferase (ammonia-forming)	[c] : C01242 + C00101 <==> C02972 + C00143 + C00014	Glycine, serine and threonine metabolism	Amino Acid Metabolism	2.1.2.10	( Unigene34299_A0A and Unigene34299_A0A )	N	0	1000	0	2
R04137	3-Hydroxyisopentyl-CoA hydro-lyase	[c] : C05998 <==> C03069 + C00001	Valine, leucine and isoleucine degradation	Amino Acid Metabolism	4.2.1.17	( Unigene26354_A0A and Unigene44656_A0A and Unigene25565_A0A and Unigene14392_A0A and Unigene55152_A0A and Unigene31479_A0A and Unigene11708_A0A and Unigene29182_A0A )	Y	-1000	1000	0	2
R04138	3-Methylcrotonoyl-CoA:carbon-dioxide ligase (ADP-forming)	[c] : C00002 + C03069 + C00288 <==> C00008 + C00009 + C03231	Valine, leucine and isoleucine degradation	Amino Acid Metabolism	6.4.1.4	( Unigene34734_A0A and Unigene4114_A0A and Unigene27268_A0A and Unigene37257_A0A and Unigene37575_A0A )	N	0	1000	0	2
R04144	5-Phospho-D-ribosylamine:glycine ligase (ADP-forming)	[c] : C00002 + C03090 + C00037 <==> C00008 + C00009 + C03838	Purine metabolism	Nucleotide Metabolism	6.3.4.13		N	0	1000	0	2
R04152	(2-Aminoethyl)phosphonate:pyruvate aminotransferase	[c] : C03557 + C00022 <==> C03167 + C00041	Phosphonate and phosphinate metabolism	Metabolism of Other Amino Acids	2.6.1.37		Y	-1000	1000	0	1
R04162	1-Alkyl-2-acyl-sn-glycero-3-phosphate phosphohydrolase	[c] : C05977 + C00001 <==> C03201 + C00009	Ether lipid metabolism	Lipid Metabolism	3.1.3.4	( Unigene4984_A0A and Unigene40967_A0A and Unigene39158_A0A and Unigene51808_A0A and Unigene49912_A0A ) or ( Unigene21841_A0A and Unigene49913_A0A )	N	0	1000	0	2
R04170	(S)-3-Hydroxydodecanoyl-CoA hydro-lyase	[c] : C05262 <==> C03221 + C00001	Fatty acid elongation in mitochondria	Lipid Metabolism	4.2.1.17;4.2.1.74	( Unigene26354_A0A and Unigene44656_A0A and Unigene25565_A0A and Unigene14392_A0A and Unigene55152_A0A and Unigene11708_A0A and Unigene29182_A0A and Unigene31479_A0A )	Y	-1000	1000	0	2
R04171	3-Hydroxy-L-kynurenine:2-oxoglutarate aminotransferase	[c] : C03227 + C00026 <==> C05645 + C00025	Tryptophan metabolism	Amino Acid Metabolism	2.6.1.7	( Unigene13559_A0A and Unigene5663_A0A and Unigene27712_A0A and Unigene16103_A0A )	N	0	1000	0	2
R04173	3-Phosphoserine:2-oxoglutarate aminotransferase	[c] : C01005 + C00026 <==> C03232 + C00025	Glycine, serine and threonine metabolism	Amino Acid Metabolism	2.6.1.52	( Unigene47536_A0A and Unigene36782_A0A and Unigene25284_A0A )	Y	-1000	1000	0	2
R04188	L-3-amino-isobutanoate:2-oxoglutarate aminotransferase	[c] : C03284 + C00026 <==> C06002 + C00025	Valine, leucine and isoleucine degradation	Amino Acid Metabolism	2.6.1.22	Unigene9554_A0A	Y	-1000	1000	0	2
R04203	(2S,3S)-3-hydroxy-2-methylbutanoyl-CoA:NAD+ oxidoreductase	[c] : C04405 + C00003 <==> C03344 + C00004 + C00080	Valine, leucine and isoleucine degradation	Amino Acid Metabolism	1.1.1.35;1.1.1.178	( Unigene8033_A0A and Unigene12237_A0A and Unigene14257_A0A )	Y	-1000	1000	0	2
R04204	(2S,3S)-3-Hydroxy-2-methylbutanoyl-CoA hydro-liase	[c] : C03345 + C00001 <==> C04405	Valine, leucine and isoleucine degradation	Amino Acid Metabolism	4.2.1.17	( Unigene26354_A0A and Unigene44656_A0A and Unigene25565_A0A and Unigene14392_A0A and Unigene55152_A0A and Unigene31479_A0A and Unigene11708_A0A and Unigene29182_A0A )	N	0	1000	0	2
R04208	2-(Formamido)-N1-(5-phosphoribosyl)acetamidine cyclo-ligase (ADP-forming)	[c] : C00002 + C04640 <==> C00008 + C00009 + C03373	Purine metabolism	Nucleotide Metabolism	6.3.3.1		N	0	1000	0	2
R04209	1-(5-phospho-D-ribosyl)-5-amino-4-imidazolecarboxylate carboxy-lyase	[c] : C04751 <==> C03373 + C00011	Purine metabolism	Nucleotide Metabolism	4.1.1.21	( Unigene49749_A0A and Unigene54480_A0A )	Y	-1000	1000	0	2
R04212	Asp-tRNA(Asn):L-glutamine amido-ligase (ADP-forming)	[c] : C03402 + C00025 + C00009 + C00008 <==> C06113 + C00064 + C00002 + C00001	Aminoacyl-tRNA biosynthesis	Translation	6.3.5.6	( Unigene14329_A0A and Unigene6029_A0A )	N	0	1000	0	2
R04221	cis-4-Hydroxy-D-proline:oxygen oxidoreductase (deaminating)	[c] : C03440 + C00007 <==> C04282 + C00027	Arginine and proline metabolism	Amino Acid Metabolism	1.4.3.3	( Unigene6815_A0A and Unigene10145_A0A and Unigene22101_A0A )	N	0	1000	0	2
R04224	(S)-3-Hydroxyisobutyryl-CoA hydro-lyase	[c] : C03460 + C00001 <==> C06000	Valine, leucine and isoleucine degradation	Amino Acid Metabolism	4.2.1.17	( Unigene26354_A0A and Unigene44656_A0A and Unigene25565_A0A and Unigene14392_A0A and Unigene55152_A0A and Unigene31479_A0A and Unigene11708_A0A and Unigene29182_A0A )	N	0	1000	0	2
R04230	(R)-4'-Phosphopantothenate:L-cysteine ligase	[c] : C00002 + C03492 + C00097 <==> C00020 + C00013 + C04352	Pantothenate and CoA biosynthesis	Metabolism of Cofactors and Vitamins	6.3.2.5		N	0	1000	0	2
R04231	(R)-4'-Phosphopantothenate:L-cysteine ligase	[c] : C00063 + C03492 + C00097 <==> C00055 + C00013 + C04352	Pantothenate and CoA biosynthesis	Metabolism of Cofactors and Vitamins	6.3.2.5		N	0	1000	0	2
R04241	Tetrahydrofolyl-[Glu](n):L-glutamate gamma-ligase (ADP-forming)	[c] : C00008 + C00009 + C03541 <==> C00002 + C03541 + C00025	Folate biosynthesis	Metabolism of Cofactors and Vitamins	6.3.2.17	( Unigene54119_A0A and CL1625.Contig1_A0A and Unigene10764_A0A and Unigene51625_A0A and Unigene14395_A0A )	Y	-1000	1000	0	2
R04242	tetrahydropteroyl-poly-gamma-glutamate gamma-glutamylhydrolase	[c] : C03541 + C00001 <==> C00101 + C00025	Folate biosynthesis	Metabolism of Cofactors and Vitamins	3.4.19.9	( Unigene53717_A0A and Unigene50966_A0A )	N	0	1000	0	2
R04247	CTP:ethanolamine-phosphate cytidylyltransferase	[c] : C00063 + C03557 <==> C00013 + C05673	Phosphonate and phosphinate metabolism	Metabolism of Other Amino Acids	2.7.7.14	Unigene44510_A0A	N	0	1000	0	2
R04285	6-Lactoyl-5,6,7,8-tetrahydropterin:NADP+ 2'-oxidoreductase	[c] : C03684 + C00005 + C00080 <==> C04244 + C00006	Folate biosynthesis	Metabolism of Cofactors and Vitamins	1.1.1.153;1.1.1.220	( Unigene6535_A0A and Unigene35960_A0A )	N	0	1000	0	2
R04286	2-amino-4-hydroxy-6-(erythro-1,2,3-trihydroxypropyl) dihydropteridine triphosphate lyase	[c] : C04895 <==> C03684 + C00536	Folate biosynthesis	Metabolism of Cofactors and Vitamins	4.2.3.12	Unigene2349_A0A	N	0	1000	0	2
R04300	4-(2-Aminoethyl)-1,2-benzenediol:oxygen oxidoreductase(deaminating)(flavin-containing)	[c] : C03758 + C00001 + C00007 <==> C04043 + C00014 + C00027	Tyrosine metabolism	Amino Acid Metabolism	1.4.3.4;1.4.3.21;1.4.99.4		N	0	1000	0	1
R04301	S-Adenosyl-L-methionine:catechol O-methyltransferase	[c] : C00019 + C03758 <==> C00021 + C05587	Tyrosine metabolism	Amino Acid Metabolism	2.1.1.6	Unigene25509_A0A	N	0	1000	0	2
R04311	1-Acyl-glycerone-3-phosphate:long-chain-alcohol O-3-phospho-2-oxopropanyltransferase	[c] : C03372 + C00339 <==> C03715 + C03129	Ether lipid metabolism	Lipid Metabolism	2.5.1.26	( Unigene34951_A0A and Unigene37562_A0A ) or ( Unigene33316_A0A )	N	0	1000	0	2
R04313	formation of N6,N6,N6-Trimethyl-L-lysine	[c] : C05546 + 2 C00001 <==> C03793 + 2 C00017	Lysine degradation	Amino Acid Metabolism	3.4.-.-		N	0	1000	0	1
R04323	2-Amino-3-carboxymuconate semialdehyde carboxy-lyase	[c] : C04409 <==> C03824 + C00011	Tryptophan metabolism	Amino Acid Metabolism	4.1.1.45	( Unigene52360_A0A and Unigene31566_A0A )	N	0	1000	0	2
R04325	10-Formyltetrahydrofolate:5'-phosphoribosylglycinamide formyltransferase	[c] : C00234 + C03838 <==> C00101 + C04376	Purine metabolism	Nucleotide Metabolism	2.1.2.2		N	0	1000	0	2
R04326	formation of Tetrahydrofolate	[c] : C03838 + C00445 + C00001 <==> C04376 + C00101	One carbon pool by folate	Metabolism of Cofactors and Vitamins	2.1.2.2		N	0	1000	0	2
R04352	UDPglucuronate beta-D-glucuronosyltransferase(acceptor-unspecific)	[c] : C04373 + C00167 <==> C11136 + C00015	Steroid hormone biosynthesis	Lipid Metabolism	2.4.1.17	( Unigene49795_A0A ) or ( Unigene49794_A0A and Unigene48897_A0A and Unigene14677_A0A and Unigene27751_A0A and Unigene44191_A0A and Unigene32852_A0A )	N	0	1000	0	2
R04353	UDPglucuronate beta-D-glucuronosyltransferase(acceptor-unspecific)	[c] : C05299 + C00167 <==> C11132 + C00015	Steroid hormone biosynthesis	Lipid Metabolism	2.4.1.17	( Unigene49795_A0A ) or ( Unigene49794_A0A and Unigene48897_A0A and Unigene14677_A0A and Unigene27751_A0A and Unigene44191_A0A and Unigene32852_A0A )	N	0	1000	0	2
R04354	UDPglucuronate beta-D-glucuronosyltransferase(acceptor-unspecific)	[c] : C05302 + C00167 <==> C11131 + C00015	Steroid hormone biosynthesis	Lipid Metabolism	2.4.1.17	( Unigene49795_A0A ) or ( Unigene49794_A0A and Unigene48897_A0A and Unigene14677_A0A and Unigene27751_A0A and Unigene44191_A0A and Unigene32852_A0A )	N	0	1000	0	2
R04355	Acyl-[acyl-carrier-protein]:malonyl-[acyl-carrier-protein] C-acyltransferase (decarboxylating)	[c] : C03939 + C01209 <==> C05744 + C00011 + C00229	Fatty acid biosynthesis	Lipid Metabolism	2.3.1.41;2.3.1.85;2.3.1.86;2.3.1.179;2.3.1.180	( Unigene19548_A0A and Unigene18727_A0A and Unigene8324_A0A and Unigene25439_A0A and Unigene50401_A0A )	N	0	1000	0	2
R04372	D-myo-Inositol-3,4-bisphosphate 4-phosphohydrolase	[c] : C04063 + C00001 <==> C04006 + C00009	Inositol phosphate metabolism	Carbohydrate Metabolism	3.1.3.66	Unigene11205_A0A	N	0	1000	0	2
R04378	1-(5'-Phosphoribosyl)-5-amino-4-imidazolecarboxamide:pyrophosphate phosphoribosyltransferase	[c] : C04677 + C00013 <==> C04051 + C00119	Purine metabolism	Nucleotide Metabolism	2.4.2.7	Unigene34623_A0A	Y	-1000	1000	0	2
R04385	biotin-carboxyl-carrier-protein:carbon-dioxide ligase (ADP-forming)	[c] : C00002 + C06250 + C00288 <==> C00008 + C00009 + C04419	Fatty acid biosynthesis	Lipid Metabolism	6.3.4.14	( Unigene16163_A0A and Unigene13697_A0A and Unigene53956_A0A and Unigene14309_A0A and Unigene34164_A0A and Unigene410_A0A and Unigene35649_A0A and Unigene52673_A0A and Unigene27707_A0A and Unigene52744_A0A and Unigene43387_A0A ) or ( Unigene43817_A0A )	N	0	1000	0	2
R04386	Acetyl-CoA:carbon-dioxide ligase (ADP-forming)	[c] : C00024 + C04419 <==> C00083 + C06250	Fatty acid biosynthesis	Lipid Metabolism	6.4.1.2	( Unigene16163_A0A and Unigene13697_A0A and Unigene53956_A0A and Unigene14309_A0A and Unigene34164_A0A and Unigene410_A0A and Unigene35649_A0A and Unigene52673_A0A and Unigene27707_A0A and Unigene52744_A0A and Unigene43387_A0A ) or ( Unigene43817_A0A )	Y	-1000	1000	0	2
R04390	L-2-Aminoadipate-6-semialdehyde:NAD(P)+ 6-oxidoreductase	[c] : C05535 + C00005 + C00080 <==> C04076 + C11482 + C00006	Lysine biosynthesis	Amino Acid Metabolism	1.2.1.31	( Unigene45632_A0A and Unigene24755_A0A )	N	0	1000	0	2
R04391	ATP:pantothenate 4'-phosphotransferase	[c] : C00002 + C04079 <==> C00008 + C04352	Pantothenate and CoA biosynthesis	Metabolism of Cofactors and Vitamins	2.7.1.33	( Unigene26783_A0A and Unigene42701_A0A and Unigene36022_A0A and Unigene41421_A0A )	N	0	1000	0	2
R04404	Phosphatidyl-myo-inositol-4,5-bisphosphate 4-phosphohydrolase	[c] : C04637 + C00001 <==> C01277 + C00009	Inositol phosphate metabolism	Carbohydrate Metabolism	3.1.3.36	( Unigene7952_A0A and Unigene46124_A0A and Unigene48767_A0A and Unigene52129_A0A and Unigene17079_A0A and Unigene18497_A0A and Unigene5414_A0A and Unigene30303_A0A and Unigene54755_A0A and Unigene22088_A0A and Unigene33036_A0A and Unigene18516_A0A and Unigene585_A0A and Unigene17827_A0A and Unigene41830_A0A and Unigene3350_A0A and Unigene3354_A0A and Unigene28637_A0A and Unigene29068_A0A and Unig…	N	0	1000	0	2
R04420	5-Methylthio-5-deoxy-D-ribose-1-phosphate ketol-isomerase	[c] : C04188 <==> C04582	Cysteine and methionine metabolism	Amino Acid Metabolism	5.3.1.23		N	0	1000	0	1
R04432	Propanoyl-CoA:(acceptor) 2,3-oxidoreductase	[c] : C04253 + C00100 <==> C04570 + C00894	Propanoate metabolism	Carbohydrate Metabolism	1.3.99.3	( Unigene54425_A0A and Unigene53730_A0A )	Y	-1000	1000	0	2
R04444	L-1-Pyrroline-3-hydroxy-5-carboxylate:NAD+ oxidoreductase	[c] : C04281 + C00003 + 2 C00001 <==> C05947 + C00004 + C00080	Arginine and proline metabolism	Amino Acid Metabolism	1.5.1.12	( Unigene22989_A0A and Unigene26663_A0A )	N	0	1000	0	2
R04445	L-1-Pyrroline-3-hydroxy-5-carboxylate:NADP+ oxidoreductase	[c] : C04281 + C00006 + 2 C00001 <==> C05947 + C00005 + C00080	Arginine and proline metabolism	Amino Acid Metabolism	1.5.1.12	( Unigene22989_A0A and Unigene26663_A0A )	N	0	1000	0	2
R04452	1-Alkyl-2-acetyl-sn-glycero-3-phosphocholine acetohydrolase	[c] : C04598 + C00001 <==> C04317 + C00033	Ether lipid metabolism	Lipid Metabolism	3.1.1.47	( Unigene16858_A0A and Unigene7764_A0A and Unigene11243_A0A and Unigene14349_A0A and Unigene32052_A0A and Unigene7143_A0A and Unigene23940_A0A )	N	0	1000	0	2
R04463	5'-Phosphoribosylformylglycinamide:L-glutamine amido-ligase (ADP-forming)	[c] : C00002 + C04376 + C00064 + C00001 <==> C00008 + C00009 + C04640 + C00025	Purine metabolism	Nucleotide Metabolism	6.3.5.3		N	0	1000	0	2
R04480	Acyl-CoA:1-acyl-sn-glycero-3-phosphoethanolamine O-acyltransferase	[c] : C04438 + C00040 <==> C00350 + C00010	Glycerophospholipid metabolism	Lipid Metabolism	2.3.1.23	( Unigene35615_A0A and Unigene4111_A0A )	N	0	1000	0	2
R04513	Phosphatidylinositol-3,4,5-trisphosphate 3-phosphohydrolase	[c] : C05981 + C00001 <==> C04637 + C00009	Inositol phosphate metabolism	Carbohydrate Metabolism	3.1.3.67	( Unigene50514_A0A and Unigene55417_A0A and Unigene28556_A0A and Unigene39192_A0A )	N	0	1000	0	2
R04533	(3R)-3-Hydroxybutanoyl-[acyl-carrier protein]:NADP+ oxidoreductase	[c] : C04618 + C00006 <==> C05744 + C00005 + C00080	Fatty acid biosynthesis	Lipid Metabolism	1.1.1.100;2.3.1.85;2.3.1.86	( Unigene19548_A0A and Unigene18727_A0A and Unigene8324_A0A and Unigene25439_A0A and Unigene50401_A0A )	Y	-1000	1000	0	2
R04534	(3R)-3-Hydroxydecanoyl-[acyl-carrier-protein]:NADP+ oxidoreductase	[c] : C05753 + C00005 <==> C04619 + C00006	Fatty acid biosynthesis	Lipid Metabolism	1.1.1.100;2.3.1.85;2.3.1.86	( Unigene19548_A0A and Unigene18727_A0A and Unigene8324_A0A and Unigene25439_A0A and Unigene50401_A0A )	Y	-1000	1000	0	2
R04535	(3R)-3-Hydroxybutanoyl-[acyl-carrier-protein] hydro-lyase	[c] : C04619 <==> C05754 + C00001	Fatty acid biosynthesis	Lipid Metabolism	2.3.1.85;2.3.1.86;4.2.1.58;4.2.1.60;4.2.1.61	( Unigene19548_A0A and Unigene18727_A0A and Unigene8324_A0A and Unigene25439_A0A and Unigene50401_A0A )	Y	-1000	1000	0	2
R04536	(3R)-3-Hydroxyoctanoyl-[acyl-carrier-protein]:NADP+ oxidoreductase	[c] : C05750 + C00005 + C00080 <==> C04620 + C00006	Fatty acid biosynthesis	Lipid Metabolism	1.1.1.100;2.3.1.85;2.3.1.86	( Unigene19548_A0A and Unigene18727_A0A and Unigene8324_A0A and Unigene25439_A0A and Unigene50401_A0A )	Y	-1000	1000	0	2
R04537	(3R)-3-Hydroxybutanoyl-[acyl-carrier-protein] hydro-lyase;(3R)-3-Hydroxyoctanoyl-[acyl-carrier-protein] hydro-lyase	[c] : C04620 <==> C05751 + C00001	Fatty acid biosynthesis	Lipid Metabolism	2.3.1.85;2.3.1.86;4.2.1.58;4.2.1.59;4.2.1.61	( Unigene19548_A0A and Unigene18727_A0A and Unigene8324_A0A and Unigene25439_A0A and Unigene50401_A0A )	Y	-1000	1000	0	2
R04543	(3R)-3-Hydroxypalmitoyl-[acyl-carrier-protein]:NADP+ oxidoreductase	[c] : C05762 + C00005 + C00080 <==> C04633 + C00006	Fatty acid biosynthesis	Lipid Metabolism	1.1.1.100;2.3.1.85;2.3.1.86	( Unigene19548_A0A and Unigene18727_A0A and Unigene8324_A0A and Unigene25439_A0A and Unigene50401_A0A )	Y	-1000	1000	0	2
R04544	(3R)-3-Hydroxypalmitoyl-[acyl-carrier-protein] hydro-lyase	[c] : C04633 <==> C05763 + C00001	Fatty acid biosynthesis	Lipid Metabolism	2.3.1.85;2.3.1.86;4.2.1.61	( Unigene19548_A0A and Unigene18727_A0A and Unigene8324_A0A and Unigene25439_A0A and Unigene50401_A0A )	Y	-1000	1000	0	2
R04545	ATP:1-phosphatidyl-1D-myo-inositol-4,5-bisphosphate 3-phosphotransferase	[c] : C00002 + C04637 <==> C00008 + C05981	Inositol phosphate metabolism	Carbohydrate Metabolism	2.7.1.153	( Unigene26035_A0A and Unigene1980_A0A and Unigene10427_A0A )	N	0	1000	0	2
R04559	1-(5'-Phosphoribosyl)-5-amino-4-(N-succinocarboxamide)-imidazole AMP-lyase	[c] : C04823 <==> C00122 + C04677	Purine metabolism	Nucleotide Metabolism	4.3.2.2	( Unigene22005_A0A and Unigene22817_A0A and Unigene37960_A0A and Unigene23385_A0A )	Y	-1000	1000	0	2
R04560	10-Formyltetrahydrofolate:5'-phosphoribosyl-5-amino-4-imidazolecarboxamide formyltransferase	[c] : C00234 + C04677 <==> C00101 + C04734	Purine metabolism	Nucleotide Metabolism	2.1.2.3	( Unigene50215_A0A and Unigene6757_A0A and Unigene47649_A0A and Unigene42840_A0A )	N	0	1000	0	2
R04566	(3R)-3-Hydroxytetradecanoyl-[acyl-carrier-protein]:NADP+ oxidoreductase	[c] : C05759 + C00005 + C00080 <==> C04688 + C00006	Fatty acid biosynthesis	Lipid Metabolism	1.1.1.100;2.3.1.85;2.3.1.86	( Unigene19548_A0A and Unigene18727_A0A and Unigene8324_A0A and Unigene25439_A0A and Unigene50401_A0A )	Y	-1000	1000	0	2
R04568	(3R)-3-Hydroxypalmitoyl-[acyl-carrier-protein] hydro-lyase	[c] : C04688 <==> C05760 + C00001	Fatty acid biosynthesis	Lipid Metabolism	2.3.1.85;2.3.1.86;4.2.1.61	( Unigene19548_A0A and Unigene18727_A0A and Unigene8324_A0A and Unigene25439_A0A and Unigene50401_A0A )	Y	-1000	1000	0	2
R04571	O-1-Alkyl-2-acyl-sn-glycero-3-phosphoethanolamine,hydrogen-donor:oxygen oxidoreductase	[c] : C04475 + C00030 + C00007 <==> C04756 + C00028 + 2 C00001	Ether lipid metabolism	Lipid Metabolism	1.14.99.19		N	0	1000	0	1
R04591	1-(5-Phosphoribosyl)-5-amino-4-carboxyimidazole:L-aspartate ligase (ADP-forming)	[c] : C00002 + C04751 + C00049 <==> C00008 + C00009 + C04823	Purine metabolism	Nucleotide Metabolism	6.3.2.6	( Unigene49749_A0A and Unigene54480_A0A )	Y	-1000	1000	0	2
R04620	2-Amino-4-hydroxy-6-(erythro-1,2,3-trihydroxypropyl) dihydropteridine triphosphate phosphohydrolase (alkaline optimum)	[c] : C04895 + 3 C00001 <==> C04874 + 3 C00009	Folate biosynthesis	Metabolism of Cofactors and Vitamins	3.1.3.1	( Unigene35166_A0A and Unigene8267_A0A and Unigene5777_A0A and Unigene26539_A0A ) or ( Unigene966_A0A and Unigene18362_A0A and Unigene8269_A0A and Unigene41274_A0A )	N	0	1000	0	2
R04639	2-Amino-4-hydroxy-6-(erythro-1,2,3-trihydroxypropyl) dihydropteridine triphosphate hydrolase	[c] : C06148 <==> C04895 + C00001	Folate biosynthesis	Metabolism of Cofactors and Vitamins	3.5.4.16	Unigene7886_A0A	N	0	1000	0	2
R04666	3-Ureidoisobutyrate amidohydrolase	[c] : C05100 + C00001 <==> C05145 + C00011 + C00014	Pyrimidine metabolism	Nucleotide Metabolism	3.5.1.6	Unigene40319_A0A	N	0	1000	0	2
R04676	17alpha,20alpha-Dihydroxycholesterol:oxygen oxidoreductase (side-chain-cleaving)	[c] : C05499 + 2 C00007 + 4 C00080 + 4 C00662 <==> C05138 + C02373 + 3 C00001 + 4 C00667	Steroid hormone biosynthesis	Lipid Metabolism	1.14.15.6	Unigene45215_A0A	N	0	1000	0	2
R04681	Estriol:NAD+ 17-oxidoreductase	[c] : C05141 + C00003 <==> C05300 + C00004 + C00080	Steroid hormone biosynthesis	Lipid Metabolism	1.1.1.62	( CL1335.Contig1_A0A and Unigene55738_A0A and Unigene42209_A0A and Unigene33351_A0A and Unigene36628_A0A and Unigene26770_A0A and Unigene3717_A0A and Unigene4816_A0A and Unigene21440_A0A and Unigene46607_A0A and Unigene41101_A0A ) or ( Unigene3097_A0A and Unigene3098_A0A )	Y	-1000	1000	0	2
R04682	Estriol:NADP+ 17-oxidoreductase	[c] : C05141 + C00006 <==> C05300 + C00005 + C00080	Steroid hormone biosynthesis	Lipid Metabolism	1.1.1.62	( CL1335.Contig1_A0A and Unigene55738_A0A and Unigene42209_A0A and Unigene33351_A0A and Unigene36628_A0A and Unigene26770_A0A and Unigene3717_A0A and Unigene4816_A0A and Unigene21440_A0A and Unigene46607_A0A and Unigene41101_A0A ) or ( Unigene3097_A0A and Unigene3098_A0A )	Y	-1000	1000	0	2
R04683	UDPglucuronate beta-D-glucuronosyltransferase(acceptor-unspecific)	[c] : C00167 + C05141 <==> C00015 + C05504	Steroid hormone biosynthesis	Lipid Metabolism	2.4.1.17	( Unigene49795_A0A ) or ( Unigene49794_A0A and Unigene48897_A0A and Unigene14677_A0A and Unigene27751_A0A and Unigene44191_A0A and Unigene32852_A0A )	N	0	1000	0	2
R04711	S-adenosyl-L-methionine:3-hexaprenyl-4,5-dihydroxylate O-methyltransferase	[c] : C00019 + C05200 <==> C00021 + C05313 + C00080	Ubiquinone and other terpenoid-quinone biosynthesis	Metabolism of Cofactors and Vitamins	2.1.1.114	( Unigene16058_A0A and Unigene22287_A0A )	N	0	1000	0	2
R04725	Dodecanoyl-[acyl-carrier protein]: malonyl-CoA C-acyltransferase(decarboxylating, oxoacyl- and enoyl-reducing and thioester-hydrolysing)	[c] : C05758 + C00005 + C00080 <==> C05223 + C00006	Fatty acid biosynthesis	Lipid Metabolism	1.3.1.10;2.3.1.85	( Unigene19548_A0A and Unigene18727_A0A and Unigene8324_A0A and Unigene25439_A0A and Unigene50401_A0A )	Y	-1000	1000	0	2
R04726	dodecanoyl-[acyl-carrier-protein]:malonyl-[acyl-carrier-protein] C-acyltransferase (decarboxylating)	[c] : C05223 + C01209 <==> C05759 + C00011 + C00229	Fatty acid biosynthesis	Lipid Metabolism	2.3.1.41;2.3.1.85;2.3.1.86;2.3.1.179;2.3.1.180	( Unigene19548_A0A and Unigene18727_A0A and Unigene8324_A0A and Unigene25439_A0A and Unigene50401_A0A )	N	0	1000	0	2
R04737	(S)-3-Hydroxyhexadecanoyl-CoA:NAD+ oxidoreductase	[c] : C05259 + C00004 + C00080 <==> C05258 + C00003	Fatty acid elongation in mitochondria	Lipid Metabolism	1.1.1.35;1.1.1.211	( ( Unigene8033_A0A ) or ( Unigene44656_A0A and Unigene25565_A0A and Unigene14392_A0A and Unigene55152_A0A and Unigene11708_A0A and Unigene29182_A0A ) )	Y	-1000	1000	0	2
R04738	(S)-3-Hydroxyhexadecanoyl-CoA hydro-lyase	[c] : C05258 <==> C05272 + C00001	Fatty acid elongation in mitochondria	Lipid Metabolism	4.2.1.17;4.2.1.74	( Unigene26354_A0A and Unigene44656_A0A and Unigene25565_A0A and Unigene14392_A0A and Unigene55152_A0A and Unigene11708_A0A and Unigene29182_A0A and Unigene31479_A0A )	Y	-1000	1000	0	2
R04739	(S)-3-Hydroxytetradecanoyl-CoA:NAD+ oxidoreductase	[c] : C05261 + C00004 <==> C05260 + C00003	Fatty acid elongation in mitochondria	Lipid Metabolism	1.1.1.35;1.1.1.211	( ( Unigene8033_A0A ) or ( Unigene44656_A0A and Unigene25565_A0A and Unigene14392_A0A and Unigene55152_A0A and Unigene11708_A0A and Unigene29182_A0A ) )	Y	-1000	1000	0	2
R04740	(S)-3-Hydroxytetradecanoyl-CoA hydro-lyase	[c] : C05260 <==> C05273 + C00001	Fatty acid elongation in mitochondria	Lipid Metabolism	4.2.1.17;4.2.1.74	( Unigene26354_A0A and Unigene44656_A0A and Unigene25565_A0A and Unigene14392_A0A and Unigene55152_A0A and Unigene11708_A0A and Unigene29182_A0A and Unigene31479_A0A )	Y	-1000	1000	0	2
R04741	(S)-3-hydroxydodecanoyl-CoA:NAD+ oxidoreductase	[c] : C05263 + C00004 + C00080 <==> C05262 + C00003	Fatty acid elongation in mitochondria	Lipid Metabolism	1.1.1.35;1.1.1.211	( ( Unigene8033_A0A ) or ( Unigene44656_A0A and Unigene25565_A0A and Unigene14392_A0A and Unigene55152_A0A and Unigene11708_A0A and Unigene29182_A0A ) )	Y	-1000	1000	0	2
R04742	Decanoyl-CoA:acetyl-CoA C-acyltransferase	[c] : C05274 + C00024 <==> C00010 + C05263	Fatty acid elongation in mitochondria	Lipid Metabolism	2.3.1.16	Unigene45487_A0A	N	0	1000	0	2
R04743	(S)-hydroxydecanoyl-CoA:NAD+ oxidoreductase	[c] : C05265 + C00004 + C00080 <==> C05264 + C00003	Fatty acid elongation in mitochondria	Lipid Metabolism	1.1.1.35;1.1.1.211	( ( Unigene8033_A0A ) or ( Unigene44656_A0A and Unigene25565_A0A and Unigene14392_A0A and Unigene55152_A0A and Unigene11708_A0A and Unigene29182_A0A ) )	Y	-1000	1000	0	2
R04744	(S)-Hydroxydecanoyl-CoA hydro-lyase	[c] : C05264 <==> C05275 + C00001	Fatty acid elongation in mitochondria	Lipid Metabolism	4.2.1.17;4.2.1.74	( Unigene26354_A0A and Unigene44656_A0A and Unigene25565_A0A and Unigene14392_A0A and Unigene55152_A0A and Unigene11708_A0A and Unigene29182_A0A and Unigene31479_A0A )	Y	-1000	1000	0	2
R04745	(S)-hydroxyoctanoyl-CoA:NAD+ oxidoreductase	[c] : C05267 + C00004 + C00080 <==> C05266 + C00003	Fatty acid elongation in mitochondria	Lipid Metabolism	1.1.1.35;1.1.1.211	( ( Unigene8033_A0A ) or ( Unigene44656_A0A and Unigene25565_A0A and Unigene14392_A0A and Unigene55152_A0A and Unigene11708_A0A and Unigene29182_A0A ) )	Y	-1000	1000	0	2
R04746	(S)-Hydroxyoctanoyl-CoA hydro-lyase	[c] : C05266 <==> C05276 + C00001	Fatty acid elongation in mitochondria	Lipid Metabolism	4.2.1.17;4.2.1.74	( Unigene26354_A0A and Unigene44656_A0A and Unigene25565_A0A and Unigene14392_A0A and Unigene55152_A0A and Unigene11708_A0A and Unigene29182_A0A and Unigene31479_A0A )	Y	-1000	1000	0	2
R04747	Hexanoyl-CoA:acetyl-CoA C-acyltransferase	[c] : C05270 + C00024 <==> C00010 + C05267	Fatty acid elongation in mitochondria	Lipid Metabolism	2.3.1.16	Unigene45487_A0A	N	0	1000	0	2
R04748	(S)-hydroxyhexanoyl-CoA:NAD+ oxidoreductase	[c] : C05269 + C00004 + C00080 <==> C05268 + C00003	Fatty acid elongation in mitochondria	Lipid Metabolism	1.1.1.35;1.1.1.211	( ( Unigene8033_A0A ) or ( Unigene44656_A0A and Unigene25565_A0A and Unigene14392_A0A and Unigene55152_A0A and Unigene11708_A0A and Unigene29182_A0A ) )	Y	-1000	1000	0	2
R04749	(S)-Hydroxyhexanoyl-CoA hydro-lyase	[c] : C05268 <==> C05271 + C00001	Fatty acid elongation in mitochondria	Lipid Metabolism	4.2.1.17;4.2.1.74	( Unigene26354_A0A and Unigene44656_A0A and Unigene25565_A0A and Unigene14392_A0A and Unigene55152_A0A and Unigene11708_A0A and Unigene29182_A0A and Unigene31479_A0A )	Y	-1000	1000	0	2
R04751	Hexanoyl-CoA:(acceptor) 2,3-oxidoreductase	[c] : C05270 + C00016 <==> C05271 + C01352	Fatty acid metabolism	Lipid Metabolism	1.3.3.6;1.3.8.1;1.3.99.3;1.3.99.13;1.3.99.-	( ( Unigene16412_A0A and Unigene41487_A0A and Unigene37402_A0A and Unigene52196_A0A and Unigene46557_A0A and Unigene32260_A0A and Unigene22825_A0A and Unigene37932_A0A and Unigene56956_A0A ) or ( Unigene53730_A0A ) or ( Unigene54425_A0A and Unigene49345_A0A and Unigene17535_A0A and Unigene43336_A0A ) )	N	0	1000	0	2
R04753	trans-Dec-2-enoyl-CoA reductase	[c] : C05275 + C00005 + C00080 <==> C05274 + C00006	Fatty acid elongation in mitochondria	Lipid Metabolism	1.3.1.8;1.3.1.38	( Unigene28257_A0A and Unigene41946_A0A and Unigene52592_A0A )	N	0	1000	0	2
R04754	Decanoyl-CoA:(acceptor) 2,3-oxidoreductase	[c] : C05274 + C00016 <==> C05275 + C01352	Fatty acid metabolism	Lipid Metabolism	1.3.3.6;1.3.99.3;1.3.99.13;1.3.99.-	( Unigene16412_A0A and Unigene41487_A0A and Unigene37402_A0A and Unigene52196_A0A and Unigene46557_A0A and Unigene32260_A0A and Unigene22825_A0A and Unigene37932_A0A and Unigene56956_A0A ) or ( Unigene54425_A0A and Unigene49345_A0A and Unigene53730_A0A and Unigene17535_A0A and Unigene43336_A0A )	N	0	1000	0	2
R04756	cis,cis-3,6-Dodecadienoyl-CoA delta3-cis-delta2-trans-isomerase	[c] : C05280 <==> C05279	Fatty acid metabolism	Lipid Metabolism	5.3.3.8	( Unigene25900_A0A and Unigene49456_A0A and Unigene7357_A0A and Unigene40082_A0A and Unigene29412_A0A and Unigene49457_A0A )	Y	-1000	1000	0	2
R04758	11beta-Hydroxyandrost-4-ene-3,17-dione:NADP+ 11-oxidoreductase	[c] : C05284 + C00006 <==> C05285 + C00005 + C00080	Steroid hormone biosynthesis	Lipid Metabolism	1.1.1.146	Unigene4816_A0A	N	0	1000	0	2
R04762	S-adenosyl-L-methionine:2-Hydroxyestrone O-methyltransferase	[c] : C05298 + C00019 <==> C05299 + C00021	Steroid hormone biosynthesis	Lipid Metabolism	2.1.1.6	Unigene25509_A0A	N	0	1000	0	2
R04764	formation of 2-Methoxyestradiol-17beta	[c] : C05301 + C00019 <==> C05302 + C00021	Steroid hormone biosynthesis	Lipid Metabolism	2.1.1.6	Unigene25509_A0A	N	0	1000	0	2
R04770	Selenomethionine methanethiol-lyase (deaminating)	[c] : C05335 + C00001 <==> C05703 + C00014 + C00109	Selenocompound metabolism	Metabolism of Other Amino Acids	4.4.1.1;4.4.1.11	( Unigene6453_A0A and Unigene6575_A0A and Unigene6574_A0A )	Y	-1000	1000	0	2
R04773	Selenomethionine:tRNAMet ligase (AMP-forming)	[c] : C00002 + C05335 + C01647 <==> C00020 + C00013 + C05336	Selenocompound metabolism	Metabolism of Other Amino Acids	6.1.1.10	( Unigene26724_A0A and Unigene50489_A0A and Unigene18150_A0A and Unigene22733_A0A and Unigene53072_A0A and Unigene12890_A0A )	N	0	1000	0	2
R04779	ATP:D-fructose-6-phosphate 1-phosphotransferase	[c] : C00002 + C05345 <==> C00008 + C05378	Glycolysis / Gluconeogenesis	Carbohydrate Metabolism	2.7.1.11	Unigene8597_A0A	N	0	1000	0	2
R04780	beta-D-Fructose 1,6-bisphosphate 1-phosphohydrolase	[c] : C05378 + C00001 <==> C05345 + C00009	Glycolysis / Gluconeogenesis	Carbohydrate Metabolism	3.1.3.11	Unigene7796_A0A	N	0	1000	0	2
R04804	delta8,24-Cholestadien-3beta-ol delta7-delta8-isomerase	[c] : C05437 <==> C05439	Steroid biosynthesis	Lipid Metabolism	5.3.3.5		N	0	1000	0	1
R04809	3alpha,7alpha,24-trihydroxy-5beta-cholestanoyl-CoA hydro-lyase [3alpha,7alpha-dihydroxy-5beta-cholest-24-enoyl-CoA-forming]	[c] : C05447 + C00001 <==> C05448	Primary bile acid biosynthesis	Lipid Metabolism	4.2.1.107	( Unigene14254_A0A and Unigene50444_A0A and Unigene18388_A0A and Unigene50572_A0A )	N	0	1000	0	2
R04810	3alpha,7alpha,24-trihydroxy-5beta-cholestanoyl-CoA:NAD+ oxidoreductase	[c] : C05448 + C00003 <==> C05449 + C00004 + C00080	Primary bile acid biosynthesis	Lipid Metabolism	1.1.1.35	( Unigene14254_A0A and Unigene50444_A0A and Unigene18388_A0A and Unigene50572_A0A )	N	0	1000	0	2
R04811	Propanoyl-CoA:acetyl-CoA C-acyltransferase;3alpha,7alpha-dihydroxy-5beta-cholanoyl-CoA:propanoyl-CoA;C-acyltransferase	[c] : C00010 + C05449 <==> C00100 + C05337	Primary bile acid biosynthesis	Lipid Metabolism	2.3.1.176	( Unigene8110_A0A and Unigene50687_A0A and Unigene26032_A0A and Unigene52075_A0A )	N	0	1000	0	2
R04812	3alpha,7alpha,12alpha,24-tetrahydroxy-5beta-cholestanoyl-CoA:NAD+ oxidoreductase	[c] : C05450 + C00003 <==> C05467 + C00004 + C00080	Primary bile acid biosynthesis	Lipid Metabolism	1.1.1.35	( Unigene14254_A0A and Unigene50444_A0A and Unigene18388_A0A and Unigene50572_A0A )	N	0	1000	0	2
R04813	(24R,25R)-3alpha,7alpha,12alpha,24-tetrahydroxy-5beta-cholestanoyl-CoA hydro-lyase	[c] : C05460 + C00001 <==> C05450	Primary bile acid biosynthesis	Lipid Metabolism	4.2.1.107	( Unigene14254_A0A and Unigene50444_A0A and Unigene18388_A0A and Unigene50572_A0A )	N	0	1000	0	2
R04840	Tetrahydrocorticosterone:NADP+ 11-oxidoreductase	[c] : C05476 + C00006 <==> C05478 + C00005 + C00080	Steroid hormone biosynthesis	Lipid Metabolism	1.1.1.146	Unigene4816_A0A	N	0	1000	0	2
R04854	20alpha-Hydroxycholesterol:oxygen oxidoreductase (side-chain-cleaving)	[c] : C05501 + C00001 + 2 C00667 <==> C05500 + C00007 + 2 C00662 + 2 C00080	Steroid hormone biosynthesis	Lipid Metabolism	1.14.15.6	Unigene45215_A0A	N	0	1000	0	2
R04855	22beta-Hydroxycholesterol:oxygen oxidoreductase (side-chain-cleaving)	[c] : C05501 + C00001 + 2 C00667 <==> C05502 + C00007 + 2 C00662 + 2 C00080	Steroid hormone biosynthesis	Lipid Metabolism	1.14.15.6	Unigene45215_A0A	N	0	1000	0	2
R04856	Sulfatide sulfohydrolase;Cerebroside-3-sulfate 3-sulfohydrolase	[c] : C06125 + C00001 <==> C02686 + C00059	Sphingolipid metabolism	Lipid Metabolism	3.1.6.1;3.1.6.8	( Unigene34748_A0A ) or ( Unigene37285_A0A and Unigene32437_A0A and Unigene32438_A0A )	N	0	1000	0	2
R04858	S-Adenosyl-L-methionine:DNA (cytosine-5-)-methyltransferase	[c] : C00019 + C00856 <==> C00021 + C02967	Cysteine and methionine metabolism	Amino Acid Metabolism	2.1.1.37	Unigene43136_A0A	N	0	1000	0	2
R04863	L-2-Aminoadipate-6-semialdehyde:NAD(P)+ 6-oxidoreductase	[c] : C05560 + C11482 <==> C05535 + C00020	Lysine biosynthesis	Amino Acid Metabolism	1.2.1.31	( Unigene45632_A0A and Unigene24755_A0A )	N	0	1000	0	2
R04864	2-Acyl-sn-glycero-3-phosphoethanolamine O-acyltransferase	[c] : C00173 + C05973 <==> C00229 + C00350	Glycerophospholipid metabolism	Lipid Metabolism	2.3.1.40		N	0	1000	0	1
R04866	S-adenosyl-L-methionine:cytochrome-c-L-lysine N6-methyltransferase	[c] : C00019 + C05544 <==> C00021 + C05545	Lysine degradation	Amino Acid Metabolism	2.1.1.43;2.1.1.59;2.1.1.60	( Unigene20922_A0A and Unigene20204_A0A and Unigene47997_A0A and Unigene20923_A0A and Unigene48376_A0A and Unigene40373_A0A and Unigene25304_A0A and Unigene46373_A0A and Unigene49522_A0A and Unigene39840_A0A and CL429.Contig1_A0A and Unigene14482_A0A and Unigene20203_A0A and Unigene7912_A0A and Unigene5397_A0A and Unigene644_A0A and Unigene25027_A0A and Unigene39580_A0A and Unigene44954_A0A and U…	N	0	1000	0	2
R04867	S-adenosyl-L-methionine:cytochrome-c-L-lysine N6-methyltransferase	[c] : C00019 + C05545 <==> C00021 + C05546	Lysine degradation	Amino Acid Metabolism	2.1.1.43;2.1.1.59;2.1.1.60	( Unigene20922_A0A and Unigene20204_A0A and Unigene47997_A0A and Unigene20923_A0A and Unigene48376_A0A and Unigene40373_A0A and Unigene25304_A0A and Unigene46373_A0A and Unigene49522_A0A and Unigene39840_A0A and CL429.Contig1_A0A and Unigene14482_A0A and Unigene20203_A0A and Unigene7912_A0A and Unigene5397_A0A and Unigene644_A0A and Unigene25027_A0A and Unigene39580_A0A and Unigene44954_A0A and U…	N	0	1000	0	2
R04880	3,4-dihydroxyphenylethyleneglycol:NAD+ oxidoreductase	[c] : C05576 + C00003 <==> C05577 + C00004 + C00080	Tyrosine metabolism	Amino Acid Metabolism	1.1.1.1	( Unigene20718_A0A ) or ( Unigene49428_A0A )	Y	-1000	1000	0	2
R04881	S-Adenosyl-L-methionine:catechol O-methyltransferase	[c] : C00019 + C05576 <==> C00021 + C05594	Tyrosine metabolism	Amino Acid Metabolism	2.1.1.6	Unigene25509_A0A	N	0	1000	0	2
R04882	3,4-Dihydroxymandelaldehyde:NAD+ oxidoreductase	[c] : C05577 + C00003 + C00001 <==> C05580 + C00004 + C00080	Tyrosine metabolism	Amino Acid Metabolism	1.2.1.5	( Unigene25877_A0A and Unigene2472_A0A ) or ( Unigene48345_A0A )	Y	-1000	1000	0	2
R04883	3,4-Dihydroxymandelaldehyde:NADP+ oxidoreductase	[c] : C05577 + C00006 + C00001 <==> C05580 + C00005 + C00080	Tyrosine metabolism	Amino Acid Metabolism	1.2.1.5	( Unigene25877_A0A and Unigene2472_A0A ) or ( Unigene48345_A0A )	Y	-1000	1000	0	2
R04884	5,6-dihydroxyindole:oxygen oxidoreductase	[c] : 2 C05578 + C00007 <==> 2 C05579 + 2 C00001	Tyrosine metabolism	Amino Acid Metabolism	1.14.18.1	( CL492.Contig1_A0A and Unigene18850_A0A and Unigene18852_A0A and Unigene20224_A0A and Unigene20899_A0A and Unigene19440_A0A and Unigene18681_A0A and Unigene18682_A0A and Unigene49439_A0A ) or ( Unigene20224_A0A and Unigene20899_A0A and Unigene19440_A0A and Unigene18681_A0A and Unigene18682_A0A )	N	0	1000	0	2
R04887	S-Adenosyl-L-methionine:catechol O-methyltransferase	[c] : C00019 + C05580 <==> C00021 + C05584	Tyrosine metabolism	Amino Acid Metabolism	2.1.1.6	Unigene25509_A0A	Y	-1000	1000	0	2
R04888	3-Methoxy-4-hydroxyphenylacetaldehyde:NAD+ oxidoreductase	[c] : C05581 + C00003 + C00001 <==> C05582 + C00004 + C00080	Tyrosine metabolism	Amino Acid Metabolism	1.2.1.5	( Unigene25877_A0A and Unigene2472_A0A ) or ( Unigene48345_A0A )	N	0	1000	0	2
R04889	3-Methoxy-4-hydroxyphenylacetaldehyde:NADP+ oxidoreductase	[c] : C05581 + C00006 + C00001 <==> C05582 + C00005 + C00080	Tyrosine metabolism	Amino Acid Metabolism	1.2.1.5	( Unigene25877_A0A and Unigene2472_A0A ) or ( Unigene48345_A0A )	N	0	1000	0	2
R04890	3-Methoxytyramine:oxygen oxidoreductase (deaminating) (copper-containing)	[c] : C05587 + C00001 + C00007 <==> C05581 + C00027 + C00014	Tyrosine metabolism	Amino Acid Metabolism	1.4.3.4		N	0	1000	0	1
R04891	3-Methoxy-4-hydroxyphenylglycolaldehyde:NAD+ oxidoreductase	[c] : C05583 + C00003 + C00001 <==> C05584 + C00004 + C00080	Tyrosine metabolism	Amino Acid Metabolism	1.2.1.5	( Unigene25877_A0A and Unigene2472_A0A ) or ( Unigene48345_A0A )	N	0	1000	0	2
R04892	3-Methoxy-4-hydroxyphenylglycolaldehyde:NADP+ oxidoreductase	[c] : C05583 + C00006 + C00001 <==> C05584 + C00005 + C00080	Tyrosine metabolism	Amino Acid Metabolism	1.2.1.5	( Unigene25877_A0A and Unigene2472_A0A ) or ( Unigene48345_A0A )	N	0	1000	0	2
R04893	L-Normetanephrine:oxygen oxidoreductase (deaminating) (copper-containing)	[c] : C05589 + C00001 + C00007 <==> C05583 + C00014 + C00027	Tyrosine metabolism	Amino Acid Metabolism	1.4.3.4		N	0	1000	0	1
R04894	L-Metanephrine:oxygen oxidoreductase (deaminating) (flavin-containing)	[c] : C05588 + C00001 + C00007 <==> C05583 + C00027 + C00218	Tyrosine metabolism	Amino Acid Metabolism	1.4.3.4		N	0	1000	0	1
R04903	5-Hydroxyindoleacetaldehyde:NAD+ oxidoreductase	[c] : C05634 + C00003 + C00001 <==> C05635 + C00080 + C00004	Tryptophan metabolism	Amino Acid Metabolism	1.2.1.3	( Unigene45813_A0A and Unigene25877_A0A and Unigene25916_A0A and Unigene48344_A0A and Unigene2472_A0A and Unigene27550_A0A and Unigene12647_A0A and Unigene45632_A0A and Unigene30385_A0A and Unigene56244_A0A and Unigene1690_A0A and Unigene24755_A0A and Unigene13946_A0A and Unigene33389_A0A and Unigene22602_A0A ) or ( Unigene48345_A0A )	N	0	1000	0	2
R04909	5-Hydroxykynurenamine decarboxy-lyase	[c] : C05651 <==> C05638 + C00011	Tryptophan metabolism	Amino Acid Metabolism	4.1.1.28		N	0	1000	0	2
R04920	CMP-2-aminoethylphosphonate:1,2-diacylglycerol ethanolaminephosphotransferase	[c] : C05673 + C00165 <==> C00055 + C05675	Phosphonate and phosphinate metabolism	Metabolism of Other Amino Acids	2.7.8.1	( Unigene53516_A0A and Unigene36020_A0A and Unigene38540_A0A )	N	0	1000	0	2
R04929	ATP:selenate adenylyltransferase	[c] : C00002 + C05697 <==> C00013 + C05686	Selenocompound metabolism	Metabolism of Other Amino Acids	2.7.7.4	Unigene49269_A0A	N	0	1000	0	2
R04931	S-Adenosyl-L-methionine:thiol S-methyltransferase	[c] : C05688 + C00019 <==> C05689 + C00021	Selenocompound metabolism	Metabolism of Other Amino Acids	2.1.1.9		N	0	1000	0	1
R04951	formation of Glycine	[c] : C05729 + C00001 <==> C05726 + C00037	Glutathione metabolism	Metabolism of Other Amino Acids	3.4.11.1;3.4.11.2;3.4.11.23;3.4.13.3	( ( Unigene8763_A0A and Unigene35913_A0A and Unigene3366_A0A and Unigene1296_A0A and Unigene15866_A0A ) or ( Unigene31183_A0A ) or ( Unigene5429_A0A and Unigene41693_A0A and Unigene5990_A0A and Unigene24260_A0A and Unigene46844_A0A and Unigene31197_A0A and Unigene2119_A0A ) )	N	0	1000	0	2
R04952	butyryl-[acyl-carrier protein]:malonyl-[acyl-carrier-protein] C-acyltransferase (decarboxylating)	[c] : C05745 + C01209 <==> C05746 + C00011 + C00229	Fatty acid biosynthesis	Lipid Metabolism	2.3.1.41;2.3.1.85;2.3.1.86;2.3.1.179;2.3.1.180	( Unigene19548_A0A and Unigene18727_A0A and Unigene8324_A0A and Unigene25439_A0A and Unigene50401_A0A )	N	0	1000	0	2
R04953	(3R)-3-Hydroxyhexanoyl-[acyl-carrier-protein]:NADP+ oxidoreductase	[c] : C05746 + C00005 + C00080 <==> C05747 + C00006	Fatty acid biosynthesis	Lipid Metabolism	1.1.1.100;2.3.1.85;2.3.1.86	( Unigene19548_A0A and Unigene18727_A0A and Unigene8324_A0A and Unigene25439_A0A and Unigene50401_A0A )	Y	-1000	1000	0	2
R04954	(3R)-3-Hydroxybutanoyl-[acyl-carrier-protein] hydro-lyase	[c] : C05747 <==> C05748 + C00001	Fatty acid biosynthesis	Lipid Metabolism	2.3.1.85;2.3.1.86;4.2.1.58	( Unigene19548_A0A and Unigene18727_A0A and Unigene8324_A0A and Unigene25439_A0A and Unigene50401_A0A )	Y	-1000	1000	0	2
R04956	Hexanoyl-[acyl-carrier protein]:oxoacyl- and enoyl-reducing and thioester-hydrolysing)	[c] : C05748 + C00005 + C00080 <==> C05749 + C00006	Fatty acid biosynthesis	Lipid Metabolism	1.3.1.10;2.3.1.85	( Unigene19548_A0A and Unigene18727_A0A and Unigene8324_A0A and Unigene25439_A0A and Unigene50401_A0A )	Y	-1000	1000	0	2
R04957	hexanoyl-[acyl-carrier protein]:malonyl-[acyl-carrier-protein] C-acyltransferase (decarboxylating)	[c] : C05749 + C01209 <==> C05750 + C00011 + C00229	Fatty acid biosynthesis	Lipid Metabolism	2.3.1.41;2.3.1.85;2.3.1.86;2.3.1.179;2.3.1.180	( Unigene19548_A0A and Unigene18727_A0A and Unigene8324_A0A and Unigene25439_A0A and Unigene50401_A0A )	N	0	1000	0	2
R04959	Octanoyl-[acyl-carrier protein]:malonyl-CoA C-acyltransferase(decarboxylating, oxoacyl- and enoyl-reducing and thioester-hydrolysing)	[c] : C05751 + C00005 + C00080 <==> C05752 + C00006	Fatty acid biosynthesis	Lipid Metabolism	1.3.1.10;2.3.1.85	( Unigene19548_A0A and Unigene18727_A0A and Unigene8324_A0A and Unigene25439_A0A and Unigene50401_A0A )	Y	-1000	1000	0	2
R04960	Octanoyl-[acyl-carrier protein]:malonyl-[acyl-carrier-protein] C-acyltransferase (decarboxylating)	[c] : C05752 + C01209 <==> C05753 + C00011 + C00229	Fatty acid biosynthesis	Lipid Metabolism	2.3.1.41;2.3.1.85;2.3.1.86;2.3.1.179;2.3.1.180	( Unigene19548_A0A and Unigene18727_A0A and Unigene8324_A0A and Unigene25439_A0A and Unigene50401_A0A )	N	0	1000	0	2
R04962	Decanoyl-[acyl-carrier protein]:malonyl-CoA C-acyltransferase(decarboxylating, oxoacyl- and enoyl-reducing and thioester-hydrolysing)	[c] : C05754 + C00005 + C00080 <==> C05755 + C00006	Fatty acid biosynthesis	Lipid Metabolism	1.3.1.10;2.3.1.85	( Unigene19548_A0A and Unigene18727_A0A and Unigene8324_A0A and Unigene25439_A0A and Unigene50401_A0A )	Y	-1000	1000	0	2
R04963	Decanoyl-[acyl-carrier protein]:malonyl-[acyl-carrier-protein] C-acyltransferase (decarboxylating)	[c] : C05755 + C01209 <==> C05756 + C00011 + C00229	Fatty acid biosynthesis	Lipid Metabolism	2.3.1.41;2.3.1.85;2.3.1.86;2.3.1.179;2.3.1.180	( Unigene19548_A0A and Unigene18727_A0A and Unigene8324_A0A and Unigene25439_A0A and Unigene50401_A0A )	N	0	1000	0	2
R04965	(3R)-3-Hydroxybutanoyl-[acyl-carrier-protein] hydro-lyase	[c] : C05757 <==> C05758 + C00001	Fatty acid biosynthesis	Lipid Metabolism	2.3.1.85;2.3.1.86;4.2.1.58;4.2.1.60;4.2.1.61	( Unigene19548_A0A and Unigene18727_A0A and Unigene8324_A0A and Unigene25439_A0A and Unigene50401_A0A )	Y	-1000	1000	0	2
R04967	Tetradecanoyl-[acyl-carrier protein]:malonyl-CoA C-acyltransferase(decarboxylating, oxoacyl- and enoyl-reducing and thioester-hydrolysing)	[c] : C05760 + C00005 + C00080 <==> C05761 + C00006	Fatty acid biosynthesis	Lipid Metabolism	1.3.1.10;2.3.1.85	( Unigene19548_A0A and Unigene18727_A0A and Unigene8324_A0A and Unigene25439_A0A and Unigene50401_A0A )	Y	-1000	1000	0	2
R04968	Tetradecanoyl-[acyl-carrier protein]:malonyl-[acyl-carrier-protein] C-acyltransferase (decarboxylating)	[c] : C05761 + C01209 <==> C05762 + C00011 + C00229	Fatty acid biosynthesis	Lipid Metabolism	2.3.1.41;2.3.1.85;2.3.1.86;2.3.1.179;2.3.1.180	( Unigene19548_A0A and Unigene18727_A0A and Unigene8324_A0A and Unigene25439_A0A and Unigene50401_A0A )	N	0	1000	0	2
R04970	Hexadecanoyl-[acyl-carrier protein:malonyl-CoA C-acyltransferase(decarboxylating, oxoacyl- and enoyl-reducing and thioester-hydrolysing)	[c] : C05763 + C00005 + C00080 <==> C05764 + C00006	Fatty acid biosynthesis	Lipid Metabolism	1.3.1.10;2.3.1.85	( Unigene19548_A0A and Unigene18727_A0A and Unigene8324_A0A and Unigene25439_A0A and Unigene50401_A0A )	Y	-1000	1000	0	2
R04972	Uroporphyrinogen I carboxy-lyase	[c] : C05766 <==> C05768 + 4 C00011	Porphyrin and chlorophyll metabolism	Metabolism of Cofactors and Vitamins	4.1.1.37	Unigene24592_A0A	N	0	1000	0	2
R04979	Bilirubin beta-diglucuronide glucuronosohydrolase	[c] : C05787 + 2 C00001 + 3 C00030 <==> C05791 + 2 C00191 + 3 C00028	Porphyrin and chlorophyll metabolism	Metabolism of Cofactors and Vitamins	1.-.-.-;3.2.1.31	( Unigene385_A0A and Unigene53592_A0A ) or ( Unigene53593_A0A )	N	0	1000	0	2
R04983	formation of 2-Hexaprenyl-3-methyl-6-methoxy-1,4-benzoquinone	[c] : C05803 + C00019 <==> C05804 + C00021	Ubiquinone and other terpenoid-quinone biosynthesis	Metabolism of Cofactors and Vitamins	2.1.1.-	Unigene29449_A0A	N	0	1000	0	2
R04984	formation of 2-Hexaprenyl-3-methyl-5-hydroxy-6-methoxy-1,4-benzoquinone	[c] : C05804 + C00007 + C00005 + C00080 <==> C05805 + C00006 + C00001	Ubiquinone and other terpenoid-quinone biosynthesis	Metabolism of Cofactors and Vitamins	1.14.13.-	( Unigene33598_A0A and Unigene6224_A0A )	N	0	1000	0	2
R04996	3-Methylimidazole acetaldehyde:NAD+ oxidoreductase	[c] : C05827 + C00003 + C00001 <==> C05828 + C00004 + C00080	Histidine metabolism	Amino Acid Metabolism	1.2.1.5	( Unigene25877_A0A and Unigene2472_A0A ) or ( Unigene48345_A0A )	N	0	1000	0	2
R05000	Polyisopentenylpyrolinate:4-hydroxybenzoate nonaprenyltransferase	[c] : C05847 + C00156 <==> C05848 + C00013	Ubiquinone and other terpenoid-quinone biosynthesis	Metabolism of Cofactors and Vitamins	2.5.1.39;2.5.1.-	( Unigene3872_A0A and Unigene2186_A0A )	N	0	1000	0	2
R05046	formamidopyrimidine nucleoside triphosphate amidohydrolase	[c] : C05922 + C00001 <==> C05923 + C00058	Folate biosynthesis	Metabolism of Cofactors and Vitamins	3.5.4.16	Unigene7886_A0A	N	0	1000	0	2
R05048	2,5-Diaminopyrimidine nucleoside triphosphate mutase	[c] : C05923 <==> C06148	Folate biosynthesis	Metabolism of Cofactors and Vitamins	3.5.4.16	Unigene7886_A0A	N	0	1000	0	2
R05050	N4-Acetylaminobutanal:NAD+ oxidoreductase	[c] : C05936 + C00003 + C00001 <==> C02946 + C00004 + C00080	Arginine and proline metabolism	Amino Acid Metabolism	1.2.1.3	( Unigene45813_A0A and Unigene25877_A0A and Unigene25916_A0A and Unigene48344_A0A and Unigene2472_A0A and Unigene27550_A0A and Unigene12647_A0A and Unigene45632_A0A and Unigene30385_A0A and Unigene56244_A0A and Unigene1690_A0A and Unigene24755_A0A and Unigene13946_A0A and Unigene33389_A0A and Unigene22602_A0A ) or ( Unigene48345_A0A )	N	0	1000	0	2
R05051	L-erythro-4-Hydroxyglutamate:NAD+ oxidoreductase	[c] : C05938 + C00003 + C00001 <==> C05947 + C00004 + C00080	Arginine and proline metabolism	Amino Acid Metabolism	1.5.1.12;1.5.99.8	( Unigene38026_A0A and Unigene39437_A0A and Unigene22989_A0A and Unigene2181_A0A and Unigene26663_A0A and Unigene50465_A0A and Unigene27570_A0A )	N	0	1000	0	2
R05052	L-erythro-4-hydroxyglutamate:2-oxoglutarate aminotransferase	[c] : C05947 + C00026 <==> C05946 + C00025	Arginine and proline metabolism	Amino Acid Metabolism	2.6.1.1;2.6.1.23	( Unigene48841_A0A and Unigene8075_A0A and Unigene41064_A0A )	N	0	1000	0	2
R05064	(S)-3-Hydroxyisobutyryl-CoA hydrolase	[c] : C06000 + C00001 <==> C00010 + C06001	Valine, leucine and isoleucine degradation	Amino Acid Metabolism	3.1.2.4	( Unigene27426_A0A and Unigene15193_A0A )	N	0	1000	0	2
R05066	3-Hydroxy-2-methylpropanoate:NAD+ oxidoreductase	[c] : C06001 + C00003 <==> C06002 + C00004 + C00080	Valine, leucine and isoleucine degradation	Amino Acid Metabolism	1.1.1.31;1.1.1.35	( ( Unigene8033_A0A ) or ( Unigene10037_A0A and Unigene30471_A0A and Unigene50704_A0A and Unigene38767_A0A ) )	Y	-1000	1000	0	2
R05085	O-Phospho-4-hydroxy-L-threonine:2-oxoglutarate aminotransferase	[c] : C06055 + C00026 <==> C06054 + C00025	Vitamin B6 metabolism	Metabolism of Cofactors and Vitamins	2.6.1.52	( Unigene47536_A0A and Unigene36782_A0A and Unigene25284_A0A )	Y	-1000	1000	0	2
R05105	3'-Phosphoadenylylsulfate:digalactosylceramide 3'-sulfotransferase	[c] : C00053 + C06126 <==> C00054 + C06127	Sphingolipid metabolism	Lipid Metabolism	2.8.2.11	Unigene37461_A0A	N	0	1000	0	2
R05145	Biotinyl-5'-AMP:apo-[carboxylase] ligase (AMP-forming)	[c] : C05921 + C06249 <==> C00020 + C06250	Biotin metabolism	Metabolism of Cofactors and Vitamins	6.3.4.9;6.3.4.10;6.3.4.11;6.3.4.15	Unigene33339_A0A	N	0	1000	0	2
R05196	1,4-alpha-D-Glucan:1,4-alpha-D-glucan 4-alpha-D-glycosyltransferase	[c] : C00718 + C00267 <==> C00208	Starch and sucrose metabolism	Carbohydrate Metabolism	2.4.1.25	( Unigene20223_A0A and Unigene20869_A0A )	N	0	1000	0	2
R05220	ATP:cob(I)yrinic acid-a,c-diamide Cobeta-adenosyltransferase	[c] : C06505 + C00002 <==> C06506 + C00536	Porphyrin and chlorophyll metabolism	Metabolism of Cofactors and Vitamins	2.5.1.17	Unigene11744_A0A	N	0	1000	0	2
R05231	6-Hydroxyhexanoate:NADP+ oxidoreductase	[c] : C06103 + C00006 <==> C06102 + C00005 + C00080	Caprolactam degradation	Xenobiotics Biodegradation and Metabolism	1.1.1.2	( Unigene20768_A0A and Unigene20767_A0A )	N	0	1000	0	2
R05233	trans-3-Chloro-2-propene-1-ol:NAD+ oxidoreductase	[c] : C06611 + C00003 <==> C06613 + C00004 + C00080	Chloroalkane and chloroalkene degradation	Xenobiotics Biodegradation and Metabolism	1.1.1.1	( Unigene20718_A0A ) or ( Unigene49428_A0A )	N	0	1000	0	2
R05234	cis-3-chloro-2-propene-1-ol:NAD+ oxidoreductase	[c] : C06612 + C00003 <==> C16348 + C00004 + C00080	Chloroalkane and chloroalkene degradation	Xenobiotics Biodegradation and Metabolism	1.1.1.1	( Unigene20718_A0A ) or ( Unigene49428_A0A )	N	0	1000	0	2
R05237	formation of trans-3-Chloroacrylic acid	[c] : C06613 + C00001 <==> C06614 + 2 C00080	Chloroalkane and chloroalkene degradation	Xenobiotics Biodegradation and Metabolism	1.2.1.3	( Unigene45813_A0A and Unigene25877_A0A and Unigene25916_A0A and Unigene48344_A0A and Unigene2472_A0A and Unigene27550_A0A and Unigene12647_A0A and Unigene30385_A0A and Unigene56244_A0A and Unigene1690_A0A and Unigene13946_A0A and Unigene33389_A0A and Unigene22602_A0A ) or ( Unigene48345_A0A )	N	0	1000	0	2
R05238	formation of cis-3-Chloroacrylic acid	[c] : C16348 + C00001 <==> C06615 + 2 C00080	Chloroalkane and chloroalkene degradation	Xenobiotics Biodegradation and Metabolism	1.2.1.3	( Unigene45813_A0A and Unigene25877_A0A and Unigene25916_A0A and Unigene48344_A0A and Unigene2472_A0A and Unigene27550_A0A and Unigene12647_A0A and Unigene30385_A0A and Unigene56244_A0A and Unigene1690_A0A and Unigene13946_A0A and Unigene33389_A0A and Unigene22602_A0A ) or ( Unigene48345_A0A )	N	0	1000	0	2
R05258	4-nitrophenol,NADPH:oxygen 4-oxidoreductase (4-hydroxylating, nitrite-forming)	[c] : C00870 + C00007 + C00005 + C00080 <==> C00472 + C00088 + C00006 + C00001	Aminobenzoate degradation	Xenobiotics Biodegradation and Metabolism	1.14.13.-		N	0	1000	0	1
R05259	Parathion,reduced-flavoprotein:oxygen oxidoreductase	[c] : C06604 + C03024 + C00007 <==> C06606 + C03161 + C00087 + C00001	Aminobenzoate degradation	Xenobiotics Biodegradation and Metabolism	1.14.14.1	( CL367.Contig1_A0A and CL1618.Contig1_A0A and Unigene37775_A0A and Unigene28120_A0A and Unigene48800_A0A and Unigene20529_A0A and Unigene25620_A0A ) or ( Unigene20555_A0A )	N	0	1000	0	2
R05286	Chloroacetaldehyde:NAD+ oxidoreductase	[c] : C06754 + C00003 + C00001 <==> C06755 + C00004 + C00080	Chloroalkane and chloroalkene degradation	Xenobiotics Biodegradation and Metabolism	1.2.1.3	( Unigene45813_A0A and Unigene25877_A0A and Unigene25916_A0A and Unigene48344_A0A and Unigene2472_A0A and Unigene27550_A0A and Unigene12647_A0A and Unigene30385_A0A and Unigene56244_A0A and Unigene1690_A0A and Unigene13946_A0A and Unigene33389_A0A and Unigene22602_A0A ) or ( Unigene48345_A0A )	N	0	1000	0	2
R05287	Chloroacetic acid halidohydrolase	[c] : C06755 + C00001 <==> C00160 + C01327	Chloroalkane and chloroalkene degradation	Xenobiotics Biodegradation and Metabolism	3.8.1.2;3.8.1.3		N	0	1000	0	1
R05371	trans-3-chloroacrylic acid chlorohydrolase	[c] : C06614 + C00001 <==> C01327 + C00222	Chloroalkane and chloroalkene degradation	Xenobiotics Biodegradation and Metabolism	3.8.1.-		N	0	1000	0	1
R05372	cis-3-chloroacrylic acid chlorohydrolase	[c] : C06615 + C00001 <==> C01327 + C00222	Chloroalkane and chloroalkene degradation	Xenobiotics Biodegradation and Metabolism	3.8.1.-		N	0	1000	0	1
R05509	formation of Propenoyl-CoA	[c] : C00024 + C00511 <==> C00033 + C00894	Styrene degradation	Xenobiotics Biodegradation and Metabolism	2.8.3.12		N	0	1000	0	1
R05551	formation of Acrylic acid	[c] : C01659 + C00001 <==> C00511 + C00014	Styrene degradation	Xenobiotics Biodegradation and Metabolism	3.5.1.4	( Unigene14329_A0A and Unigene10776_A0A )	N	0	1000	0	2
R05556	(2E,6E)-farnesyl-diphosphate:isopentenyl-diphosphate cistransferase (adding 10-55 isopentenyl units)	[c] : C00448 + C00129 <==> C05859 + C00013	Terpenoid backbone biosynthesis	Metabolism of Terpenoids and Polyketides	2.5.1.87	( Unigene50054_A0A and Unigene53106_A0A )	N	0	1000	0	2
R05577	L-Aspartate:tRNA(Asp) ligase (AMP-forming)	[c] : C01638 + C00049 + C00002 <==> C02984 + C00013 + C00020	Aminoacyl-tRNA biosynthesis	Translation	6.1.1.12;6.1.1.23	( Unigene44921_A0A and Unigene48751_A0A and Unigene44649_A0A )	N	0	1000	0	2
R05578	L-glutamate:tRNA(Glu) ligase (AMP-forming)	[c] : C01641 + C00025 + C00002 <==> C02987 + C00013 + C00020	Porphyrin and chlorophyll metabolism	Metabolism of Cofactors and Vitamins	6.1.1.17;6.1.1.24	( Unigene24613_A0A and Unigene25679_A0A and Unigene30563_A0A and Unigene55538_A0A and Unigene3329_A0A and Unigene3330_A0A and Unigene42070_A0A and Unigene46161_A0A and Unigene53072_A0A and Unigene39076_A0A and Unigene10193_A0A ) or ( Unigene24516_A0A )	N	0	1000	0	2
R05579	Glutaryl-CoA:(acceptor) 2,3-oxidoreductase	[c] : C00527 + C00028 <==> C02411 + C00030	Benzoate degradation	Xenobiotics Biodegradation and Metabolism	1.3.99.7	Unigene49127_A0A	N	0	1000	0	2
R05590	Acylamide aminohydrolase	[c] : C09815 + C00001 <==> C00180 + C00014	Aminobenzoate degradation	Xenobiotics Biodegradation and Metabolism	3.5.1.4	( Unigene14329_A0A and Unigene10776_A0A )	N	0	1000	0	2
R05616	all-trans-hexaprenyl diphosphate:4-hydroxybenzoate hexaprenyltransferase	[c] : C01230 + C00156 <==> C13425 + C00013	Ubiquinone and other terpenoid-quinone biosynthesis	Metabolism of Cofactors and Vitamins	2.5.1.-	( Unigene3872_A0A and Unigene2186_A0A )	N	0	1000	0	2
R05623	N,N,N-trimethylamine,NADPH:oxygen oxidoreductase (N-oxide-forming)	[c] : C00565 + C00004 + C00080 + C00007 <==> C01104 + C00003 + C00001	Methane metabolism	Energy Metabolism	1.14.13.8	Unigene41337_A0A	N	0	1000	0	2
R05692	GDP-L-fucose:NADP+ 4-oxidoreductase (3,5-epimerizing)	[c] : C01222 + C00005 + C00080 <==> C00325 + C00006	Fructose and mannose metabolism	Carbohydrate Metabolism	1.1.1.271	Unigene14565_A0A	N	0	1000	0	2
R05703	lanosterol D24-reductase	[c] : C01189 + C00006 <==> C05439 + C00005 + C00080	Steroid biosynthesis	Lipid Metabolism	1.3.1.72	( Unigene13969_A0A and Unigene16196_A0A and Unigene42624_A0A )	Y	-1000	1000	0	2
R05794	CDP-diacylglycerol:choline O-phosphatidyltransferase	[c] : C00269 + C00114 <==> C00055 + C00157	Glycerophospholipid metabolism	Lipid Metabolism	2.7.8.24		N	0	1000	0	1
R05795	ATP:1-phosphatidyl-1D-myo-inositol-4-phosphate 3-phosphotransferase	[c] : C00002 + C01277 <==> C00008 + C11554	Inositol phosphate metabolism	Carbohydrate Metabolism	2.7.1.154	( Unigene31148_A0A and Unigene4423_A0A and Unigene41574_A0A and Unigene47983_A0A and Unigene38684_A0A and Unigene18642_A0A and Unigene31271_A0A )	N	0	1000	0	2
R05800	ATP:1D-myo-inositol-1,4,5-trisphosphate 6-phosphotransferase	[c] : C00002 + C01245 <==> C00008 + C11555	Inositol phosphate metabolism	Carbohydrate Metabolism	2.7.1.151	Unigene41599_A0A	N	0	1000	0	2
R05801	ATP:1D-myo-inositol-1,4,5-trisphosphate 6-phosphotransferase	[c] : C00002 + C11555 <==> C00008 + C01284	Inositol phosphate metabolism	Carbohydrate Metabolism	2.7.1.151	Unigene41599_A0A	N	0	1000	0	2
R05802	ATP:1-phosphatidyl-1D-myo-inositol-3-phosphate 5-phosphotransferase	[c] : C00002 + C04549 <==> C00008 + C11556	Inositol phosphate metabolism	Carbohydrate Metabolism	2.7.1.150	( CL843.Contig1_A0A ) or ( Unigene11946_A0A and Unigene1614_A0A )	N	0	1000	0	2
R05803	ATP:1-phosphatidyl-1D-myo-inositol-5-phosphate 4-phosphotransferase	[c] : C00002 + C11557 <==> C00008 + C04637	Inositol phosphate metabolism	Carbohydrate Metabolism	2.7.1.149	Unigene45974_A0A	N	0	1000	0	2
R05907	formation of Tn antigen	[c] : G10611 + C02189 <==> G10619 + G00023	Mucin type O-Glycan biosynthesis	Glycan Biosynthesis and Metabolism	2.4.1.41	( Unigene10042_A0A and Unigene9870_A0A and Unigene10357_A0A and Unigene34274_A0A and Unigene28948_A0A and Unigene7131_A0A and Unigene4490_A0A and Unigene28460_A0A and Unigene33430_A0A and Unigene24151_A0A and Unigene17800_A0A and Unigene31158_A0A and Unigene544_A0A and Unigene38084_A0A and Unigene18335_A0A and Unigene32358_A0A and Unigene16776_A0A and Unigene15461_A0A ) or ( Unigene24283_A0A )	N	0	1000	0	2
R05908	formation of T antigen	[c] : G10609 + G00023 <==> G10619 + G00024	Mucin type O-Glycan biosynthesis	Glycan Biosynthesis and Metabolism	2.4.1.122	( Unigene51115_A0A and Unigene12222_A0A )	N	0	1000	0	2
R05910	formation of G00031	[c] : G10610 + G00023 <==> G10619 + G00031	Mucin type O-Glycan biosynthesis	Glycan Biosynthesis and Metabolism	2.4.1.102;2.4.1.148		N	0	1000	0	1
R05916	formation of G00143	[c] : G10610 + C01194 <==> G10619 + G00143	Glycosylphosphatidylinositol(GPI)-anchor biosynthesis	Glycan Biosynthesis and Metabolism	2.4.1.198	Unigene23750_A0A	N	0	1000	0	2
R05920	formation of G00147	[c] : C00350 + G00146 <==> C00165 + G00147	Glycosylphosphatidylinositol(GPI)-anchor biosynthesis	Glycan Biosynthesis and Metabolism	2.7.-.-	( Unigene34450_A0A and Unigene43366_A0A and Unigene41923_A0A )	N	0	1000	0	2
R05921	formation of G00148	[c] : G10617 + G00147 <==> G10622 + G00148	Glycosylphosphatidylinositol(GPI)-anchor biosynthesis	Glycan Biosynthesis and Metabolism	2.4.1.-	Unigene23427_A0A	N	0	1000	0	2
R05922	formation of G00149	[c] : G10617 + G00148 <==> G10622 + G00149	Glycosylphosphatidylinositol(GPI)-anchor biosynthesis	Glycan Biosynthesis and Metabolism	2.4.1.-	Unigene37387_A0A	N	0	1000	0	2
R05924	formation of Diacylglycerol	[c] : C00350 + G00141 <==> C00165 + G00151	Glycosylphosphatidylinositol(GPI)-anchor biosynthesis	Glycan Biosynthesis and Metabolism	2.7.-.-	Unigene8561_A0A	N	0	1000	0	2
R05925	formation of G00154	[c] : G10613 + C02189 <==> G10619 + G00154	Glycosaminoglycan biosynthesis - chondroitin sulfate	Glycan Biosynthesis and Metabolism	2.4.2.26	( Unigene7594_A0A and Unigene48605_A0A )	N	0	1000	0	2
R05926	formation of G00155	[c] : G10609 + G00154 <==> G10619 + G00155	Glycosaminoglycan biosynthesis - chondroitin sulfate	Glycan Biosynthesis and Metabolism	2.4.1.133	Unigene26329_A0A	N	0	1000	0	2
R05927	formation of G00156	[c] : G10609 + G00155 <==> G10619 + G00156	Glycosaminoglycan biosynthesis - chondroitin sulfate	Glycan Biosynthesis and Metabolism	2.4.1.134	( Unigene34085_A0A and Unigene4630_A0A )	N	0	1000	0	2
R05928	formation of G00157	[c] : G10612 + G00156 <==> G10619 + G00157	Glycosaminoglycan biosynthesis - chondroitin sulfate	Glycan Biosynthesis and Metabolism	2.4.1.135	( Unigene46916_A0A and Unigene27641_A0A and Unigene53180_A0A and Unigene51486_A0A and Unigene30731_A0A and Unigene2334_A0A ) or ( Unigene4888_A0A )	N	0	1000	0	2
R05929	formation of G00158	[c] : G10611 + G00157 <==> G10619 + G00158	Glycosaminoglycan biosynthesis - chondroitin sulfate	Glycan Biosynthesis and Metabolism	2.4.1.174	( Unigene51127_A0A and Unigene14862_A0A and Unigene55248_A0A and Unigene44785_A0A )	Y	-1000	1000	0	2
R05930	formation of G00162	[c] : G10610 + G00157 <==> G10619 + G00162	Glycosaminoglycan biosynthesis - heparan sulfate	Glycan Biosynthesis and Metabolism	2.4.1.223	( CL49.Contig1_A0A and CL14.Contig2_A0A and CL46.Contig1_A0A and CL5.Contig2_A0A and Unigene20365_A0A and Unigene9160_A0A and Unigene18739_A0A and Unigene19018_A0A and Unigene20196_A0A and Unigene27782_A0A and Unigene24970_A0A and Unigene9482_A0A and Unigene2276_A0A and CL1413.Contig1_A0A and CL466.Contig1_A0A and CL468.Contig1_A0A and CL456.Contig1_A0A and CL1507.Contig1_A0A and Unigene29754_A0A…	N	0	1000	0	2
R05931	formation of G00159	[c] : G10612 + G00158 <==> G10619 + G00159	Glycosaminoglycan biosynthesis - chondroitin sulfate	Glycan Biosynthesis and Metabolism	2.4.1.226	Unigene29071_A0A	Y	-1000	1000	0	2
R05932	formation of G00160	[c] : G10611 + G00159 <==> G10619 + G00160	Glycosaminoglycan biosynthesis - chondroitin sulfate	Glycan Biosynthesis and Metabolism	2.4.1.175	Unigene29071_A0A	Y	-1000	1000	0	2
R05935	formation of G00163	[c] : G10612 + G00162 <==> G10619 + G00163	Glycosaminoglycan biosynthesis - heparan sulfate	Glycan Biosynthesis and Metabolism	2.4.1.225	( Unigene36825_A0A and Unigene776_A0A and Unigene15327_A0A and Unigene37450_A0A and Unigene34369_A0A )	N	0	1000	0	2
R05936	formation of G00164	[c] : G10610 + G00163 <==> G10619 + G00164	Glycosaminoglycan biosynthesis - heparan sulfate	Glycan Biosynthesis and Metabolism	2.4.1.224	( CL49.Contig1_A0A and CL14.Contig2_A0A and CL46.Contig1_A0A and CL5.Contig2_A0A and Unigene20365_A0A and Unigene9160_A0A and Unigene18739_A0A and Unigene19018_A0A and Unigene20196_A0A and Unigene27782_A0A and Unigene24970_A0A and Unigene9482_A0A and Unigene2276_A0A and CL1413.Contig1_A0A and CL466.Contig1_A0A and CL468.Contig1_A0A and CL456.Contig1_A0A and CL1507.Contig1_A0A and Unigene29754_A0A…	N	0	1000	0	2
R05941	formation of GM1	[c] : G10609 + G00109 <==> G10619 + G00110	Glycosphingolipid biosynthesis - ganglio series	Glycan Biosynthesis and Metabolism	2.4.1.62	Unigene56650_A0A	Y	-1000	1000	0	2
R05948	formation of GD1b	[c] : G10609 + G00114 <==> G10619 + G00115	Glycosphingolipid biosynthesis - ganglio series	Glycan Biosynthesis and Metabolism	2.4.1.62	Unigene56650_A0A	Y	-1000	1000	0	2
R05953	formation of GT1c	[c] : G10609 + G00119 <==> G10619 + G00120	Glycosphingolipid biosynthesis - ganglio series	Glycan Biosynthesis and Metabolism	2.4.1.62	Unigene56650_A0A	Y	-1000	1000	0	2
R05956	formation of GA1	[c] : G10609 + G00123 <==> G10619 + G00124	Glycosphingolipid biosynthesis - ganglio series	Glycan Biosynthesis and Metabolism	2.4.1.62	Unigene56650_A0A	Y	-1000	1000	0	2
R05966	formation of Globoside	[c] : C00001 + G00095 <==> C01132 + G00094	Glycosphingolipid biosynthesis - globo series	Glycan Biosynthesis and Metabolism	3.2.1.49	( Unigene737_A0A and Unigene23451_A0A )	Y	-1000	1000	0	2
R05969	UDP-N-acetyl-D-glucosamine:dolichyl-phosphate N-acetyl-D-glucosamine phosphotransferase	[c] : C00043 + C00110 <==> C00105 + G00001	N-Glycan biosynthesis	Glycan Biosynthesis and Metabolism	2.7.8.15	( Unigene34927_A0A and Unigene25602_A0A and Unigene34007_A0A )	N	0	1000	0	2
R05970	formation of N,N'-Chitobiosyldiphosphodolichol	[c] : G10610 + G00001 <==> G10619 + G00002	N-Glycan biosynthesis	Glycan Biosynthesis and Metabolism	2.4.1.141	( CL485.Contig1_A0A and Unigene3867_A0A and Unigene27375_A0A and Unigene29285_A0A )	N	0	1000	0	2
R05972	formation of G00003	[c] : G10614 + G00002 <==> G10620 + G00003	N-Glycan biosynthesis	Glycan Biosynthesis and Metabolism	2.4.1.142	( Unigene7263_A0A and Unigene43238_A0A )	N	0	1000	0	2
R05973	formation of G00004	[c] : G10614 + G00003 <==> G10620 + G00004	N-Glycan biosynthesis	Glycan Biosynthesis and Metabolism	2.4.1.132	( Unigene4900_A0A and Unigene15328_A0A )	N	0	1000	0	2
R05974	formation of nLc7Cer	[c] : G10610 + G00067 <==> G10619 + G00068	Glycosphingolipid biosynthesis - lacto and neolacto series	Glycan Biosynthesis and Metabolism	2.4.1.149	( Unigene16572_A0A and Unigene15235_A0A ) or ( Unigene22215_A0A )	Y	-1000	1000	0	2
R05975	formation of nLc5Cer	[c] : G10610 + G00050 <==> G10619 + G00066	Glycosphingolipid biosynthesis - lacto and neolacto series	Glycan Biosynthesis and Metabolism	2.4.1.149;2.4.1.163	( Unigene16572_A0A and Unigene15235_A0A ) or ( Unigene22215_A0A )	Y	-1000	1000	0	2
R05976	formation of Dolichyl diphosphate	[c] : C03021 + G00008 <==> C00621 + G00009	N-Glycan biosynthesis	Glycan Biosynthesis and Metabolism	2.4.1.119	( Unigene45528_A0A and Unigene26076_A0A and Unigene14286_A0A and Unigene11955_A0A and Unigene47419_A0A and Unigene15961_A0A )	N	0	1000	0	2
R05977	formation of Paragloboside	[c] : G10609 + G00036 <==> G10619 + G00050	Glycosphingolipid biosynthesis - lacto and neolacto series	Glycan Biosynthesis and Metabolism	2.4.1.-	( Unigene45695_A0A and Unigene16162_A0A and Unigene53169_A0A ) or ( Unigene54373_A0A and Unigene27218_A0A )	Y	-1000	1000	0	2
R05979	formation of G00171	[c] : C00001 + G00009 <==> C00267 + G00171	N-Glycan biosynthesis	Glycan Biosynthesis and Metabolism	3.2.1.106	Unigene39007_A0A	N	0	1000	0	2
R05980	formation of G00010	[c] : C00001 + G00171 <==> C00267 + G00010	N-Glycan biosynthesis	Glycan Biosynthesis and Metabolism	3.2.1.84	( Unigene44936_A0A and Unigene16266_A0A )	N	0	1000	0	2
R05981	formation of G00011	[c] : C00001 + G00010 <==> C00267 + G00011	N-Glycan biosynthesis	Glycan Biosynthesis and Metabolism	3.2.1.84	( Unigene44936_A0A and Unigene16266_A0A )	N	0	1000	0	2
R05982	formation of G00012	[c] : G00011 + 4 C00001 <==> G00012 + 4 C00159	N-Glycan biosynthesis	Glycan Biosynthesis and Metabolism	3.2.1.113	( Unigene54051_A0A and Unigene56218_A0A and Unigene23035_A0A and Unigene56732_A0A and Unigene34134_A0A )	N	0	1000	0	2
R05983	formation of G00013	[c] : G10610 + G00012 <==> G10619 + G00013	N-Glycan biosynthesis	Glycan Biosynthesis and Metabolism	2.4.1.101	( Unigene4655_A0A and Unigene43838_A0A )	N	0	1000	0	2
R05984	formation of G00014	[c] : G00013 + 2 C00001 <==> G00014 + 2 C00159	N-Glycan biosynthesis	Glycan Biosynthesis and Metabolism	3.2.1.114	( Unigene5616_A0A and Unigene37143_A0A and Unigene822_A0A and Unigene31549_A0A )	N	0	1000	0	2
R05985	formation of G00015	[c] : G10610 + G00014 <==> G10619 + G00015	N-Glycan biosynthesis	Glycan Biosynthesis and Metabolism	2.4.1.143	( Unigene46680_A0A and Unigene18023_A0A )	N	0	1000	0	2
R05987	formation of G00020	[c] : G10610 + G00015 <==> G10619 + G00020	N-Glycan biosynthesis	Glycan Biosynthesis and Metabolism	2.4.1.145	( Unigene13125_A0A and Unigene28791_A0A and Unigene38443_A0A and Unigene30938_A0A )	N	0	1000	0	2
R05988	formation of G00016	[c] : G10615 + G00015 <==> G10620 + G00016	N-Glycan biosynthesis	Glycan Biosynthesis and Metabolism	2.4.1.68	( Unigene5408_A0A and Unigene17357_A0A and Unigene53815_A0A )	N	0	1000	0	2
R05989	UDP-galactose:N-acetyl-beta-D-glucosaminylglycopeptide beta-1,4-galactosyltransferase	[c] : 2 G10609 + G00016 <==> 2 G10619 + G00017	N-Glycan biosynthesis	Glycan Biosynthesis and Metabolism	2.4.1.38	( Unigene45695_A0A and Unigene16162_A0A and Unigene53169_A0A ) or ( Unigene54373_A0A and Unigene27218_A0A )	N	0	1000	0	2
R05990	CMP-N-acetylneuraminate:beta-D-galactosyl 1,4-N-acetyl-beta-D-glucosamine alpha 2,6-N-acetylneuraminyltransferase	[c] : 2 G10616 + G00017 <==> 2 G10621 + G00018	N-Glycan biosynthesis	Glycan Biosynthesis and Metabolism	2.4.99.1	Unigene24734_A0A	N	0	1000	0	2
R05991	formation of G00021	[c] : G10610 + G00020 <==> G10619 + G00021	N-Glycan biosynthesis	Glycan Biosynthesis and Metabolism	2.4.1.155		N	0	1000	0	1
R05992	formation of G00022	[c] : G10610 + G00021 <==> G10619 + G00022	N-Glycan biosynthesis	Glycan Biosynthesis and Metabolism	2.4.1.201	Unigene13125_A0A	N	0	1000	0	2
R06006	formation of Lc4Cer	[c] : G10609 + G00036 <==> G10619 + G00037	Glycosphingolipid biosynthesis - lacto and neolacto series	Glycan Biosynthesis and Metabolism	2.4.1.86		Y	-1000	1000	0	1
R06010	formation of GM2	[c] : G00110 + C00001 <==> G00109 + C00124	Glycosphingolipid biosynthesis - ganglio series	Glycan Biosynthesis and Metabolism	3.2.1.23	( Unigene34401_A0A and Unigene52557_A0A and Unigene42262_A0A ) or ( Unigene32446_A0A and Unigene3372_A0A )	Y	-1000	1000	0	2
R06033	formation of nLc6Cer	[c] : G10609 + G00066 <==> G10619 + G00067	Glycosphingolipid biosynthesis - lacto and neolacto series	Glycan Biosynthesis and Metabolism	2.4.1.-	( Unigene45695_A0A and Unigene16162_A0A and Unigene53169_A0A ) or ( Unigene54373_A0A and Unigene27218_A0A )	Y	-1000	1000	0	2
R06038	formation of V3Fuc-nLc6Cer	[c] : G10615 + G00067 <==> G10620 + G00089	Glycosphingolipid biosynthesis - lacto and neolacto series	Glycan Biosynthesis and Metabolism	2.4.1.152		Y	-1000	1000	0	1
R06153	formation of 3'-isoLM1	[c] : G10616 + G00037 <==> G10621 + G00047	Glycosphingolipid biosynthesis - lacto and neolacto series	Glycan Biosynthesis and Metabolism	2.4.99.6		Y	-1000	1000	0	1
R06155	formation of Fuc-Lc4Cer	[c] : G10615 + G00037 <==> G10620 + G00046	Glycosphingolipid biosynthesis - lacto and neolacto series	Glycan Biosynthesis and Metabolism	2.4.1.65	Unigene16052_A0A	Y	-1000	1000	0	2
R06156	formation of IV2Fuc-Lc4Cer	[c] : G10615 + G00037 <==> G10620 + G00044	Glycosphingolipid biosynthesis - lacto and neolacto series	Glycan Biosynthesis and Metabolism	2.4.1.69		Y	-1000	1000	0	1
R06162	formation of G00043	[c] : G10615 + G00042 <==> G10620 + G00043	Glycosphingolipid biosynthesis - lacto and neolacto series	Glycan Biosynthesis and Metabolism	2.4.1.65	Unigene16052_A0A	Y	-1000	1000	0	2
R06163	formation of IV2Fuc,III4Fuc-Lc4Cer	[c] : G10615 + G00044 <==> G10620 + G00045	Glycosphingolipid biosynthesis - lacto and neolacto series	Glycan Biosynthesis and Metabolism	2.4.1.65	Unigene16052_A0A	Y	-1000	1000	0	2
R06164	formation of G00040	[c] : G10615 + G00039 <==> G10620 + G00040	Glycosphingolipid biosynthesis - lacto and neolacto series	Glycan Biosynthesis and Metabolism	2.4.1.65	Unigene16052_A0A	Y	-1000	1000	0	2
R06165	formation of Fuc-3'-isoLM1	[c] : G10615 + G00047 <==> G10620 + G00048	Glycosphingolipid biosynthesis - lacto and neolacto series	Glycan Biosynthesis and Metabolism	2.4.1.65	Unigene16052_A0A	Y	-1000	1000	0	2
R06167	formation of Type IA glycolipid	[c] : G10611 + G00044 <==> G10619 + G00042	Glycosphingolipid biosynthesis - lacto and neolacto series	Glycan Biosynthesis and Metabolism	2.4.1.40		Y	-1000	1000	0	1
R06168	formation of Type IB glycolipid	[c] : G10609 + G00044 <==> G10619 + G00039	Glycosphingolipid biosynthesis - lacto and neolacto series	Glycan Biosynthesis and Metabolism	2.4.1.37		Y	-1000	1000	0	1
R06171	L-Allothreonine acetaldehyde-lyase	[c] : C00037 + C00084 <==> C05519	Glycine, serine and threonine metabolism	Amino Acid Metabolism	4.1.2.5		Y	-1000	1000	0	2
R06221	formation of V3Fuc,III3Fuc-nLc6Cer	[c] : G10615 + G00089 <==> G10620 + G00090	Glycosphingolipid biosynthesis - lacto and neolacto series	Glycan Biosynthesis and Metabolism	2.4.1.-	Unigene16052_A0A	Y	-1000	1000	0	2
R06222	formation of G00085	[c] : G10615 + G00084 <==> G10620 + G00085	Glycosphingolipid biosynthesis - lacto and neolacto series	Glycan Biosynthesis and Metabolism	2.4.1.-	Unigene16052_A0A	Y	-1000	1000	0	2
R06224	formation of G00086	[c] : G10615 + G00085 <==> G10620 + G00086	Glycosphingolipid biosynthesis - lacto and neolacto series	Glycan Biosynthesis and Metabolism	2.4.1.-	Unigene16052_A0A	Y	-1000	1000	0	2
R06227	formation of G00082	[c] : G10615 + G00081 <==> G10620 + G00082	Glycosphingolipid biosynthesis - lacto and neolacto series	Glycan Biosynthesis and Metabolism	2.4.1.-	Unigene16052_A0A	Y	-1000	1000	0	2
R06230	formation of III3Fuc-nLc6Cer	[c] : G10615 + G00067 <==> G10620 + G00076	Glycosphingolipid biosynthesis - lacto and neolacto series	Glycan Biosynthesis and Metabolism	2.4.1.-	Unigene16052_A0A	Y	-1000	1000	0	2
R06238	GDP-D-mannose:D-Man-alpha-(1->3)-D-Man-beta-(1->4)-D-GlcNAc-beta-(1->4)-D-GlcNAc-diphosphodolichol alpha-6-mannosyltransferase	[c] : G10614 + G00004 <==> G10620 + G00005	N-Glycan biosynthesis	Glycan Biosynthesis and Metabolism	2.4.1.-	( Unigene4900_A0A and Unigene15328_A0A )	N	0	1000	0	2
R06263	dolichyl beta-D-glucosyl phosphate:D-Glc-alpha-(1->3)-D-Man-alpha-(1->2)-D-Man-alpha-(1->2)-D-Man-alpha-(1->3)-[D-Man-alpha-(1->2)-D-Man-alpha-(1->3)-[D-Man-alpha-(1->2)-D-Man-alpha-(1->6)]-D-Man-alpha-(1->6)]-D-Man-beta-(1->4)-D-GlcNAc-beta-(1->4)-D-GlcNAc-diphosphodolichol alpha-1,3-glucosyltransferase	[c] : G10618 + G10598 <==> G10622 + G10599	N-Glycan biosynthesis	Glycan Biosynthesis and Metabolism	2.4.1.-	Unigene17752_A0A	N	0	1000	0	2
R06264	dolichyl beta-D-glucosyl phosphate:D-Glc-alpha-(1->3)-D-Glc-alpha-(1->3)-D-Man-alpha-(1->2)-D-Man-alpha-(1->2)-D-Man-alpha-(1->3)-[D-Man-alpha-(1->2)-D-Man-alpha-(1->3)-[D-Man-alpha-(1->2)-D-Man-alpha-(1->6)]-D-Man-alpha-(1->6)]-D-Man-beta-(1->4)-D-GlcNAc-beta-(1->4)-D-GlcNAc-diphosphodolichol alpha-1,2-glucosyltransferase	[c] : G10618 + G10599 <==> G10622 + G00008	N-Glycan biosynthesis	Glycan Biosynthesis and Metabolism	2.4.1.-	( CL1266.Contig1_A0A and Unigene50383_A0A and Unigene45861_A0A and Unigene43230_A0A and Unigene46981_A0A and Unigene34739_A0A ) or ( CL1685.Contig1_A0A )	N	0	1000	0	2
R06364	CDPethanolamine:1-alkyl-2-acylglycerol ethanolaminephosphotransferase	[c] : C00570 + C03201 <==> C00055 + C04475	Ether lipid metabolism	Lipid Metabolism	2.7.8.1	( Unigene53516_A0A and Unigene36020_A0A and Unigene38540_A0A )	N	0	1000	0	2
R06366	Aldehyde:NAD+ oxidoreductase	[c] : C02576 + C00001 + C00003 <==> C11924 + C00004 + C00080	Limonene and pinene degradation	Metabolism of Terpenoids and Polyketides	1.2.1.3	( Unigene45813_A0A and Unigene25877_A0A and Unigene25916_A0A and Unigene48344_A0A and Unigene2472_A0A and Unigene27550_A0A and Unigene12647_A0A and Unigene30385_A0A and Unigene56244_A0A and Unigene1690_A0A and Unigene13946_A0A and Unigene33389_A0A and Unigene22602_A0A ) or ( Unigene48345_A0A )	N	0	1000	0	2
R06411	cis-2-Methyl-5-isopropylhexa-2,5-dienoyl-CoA hydro-lyase	[c] : C11946 + C00001 <==> C11947	Limonene and pinene degradation	Metabolism of Terpenoids and Polyketides	4.2.1.17	Unigene31479_A0A	N	0	1000	0	2
R06412	trans-2-Methyl-5-isopropylhexa-2,5-dienoyl-CoA hydro-lyase	[c] : C11945 + C00001 <==> C11947	Limonene and pinene degradation	Metabolism of Terpenoids and Polyketides	4.2.1.17	Unigene31479_A0A	N	0	1000	0	2
R06513	dTDPglucose 4,6-hydro-lyase	[c] : C00842 <==> C11907 + C00001	Streptomycin biosynthesis	Biosynthesis of Other Secondary Metabolites	4.2.1.46	Unigene28718_A0A	N	0	1000	0	2
R06516	sphingosine-1-phosphate palmitaldehyde-lyase (phosphoethanolamine-forming)	[c] : C06124 <==> C00346 + C06123	Sphingolipid metabolism	Lipid Metabolism	4.1.2.27;4.1.2.-	( Unigene958_A0A and Unigene183_A0A )	N	0	1000	0	2
R06517	acyl-CoA:sphingosine N-acyltransferase	[c] : C00040 + C00836 <==> C00010 + C12126	Sphingolipid metabolism	Lipid Metabolism	2.3.1.24		N	0	1000	0	1
R06519	dihydroceramide,ferrocytochrome b5:oxygen oxidoreductase (4,5-dehydrogenating)	[c] : C12126 + C00030 + C00007 <==> C00195 + C00028 + 2 C00001	Sphingolipid metabolism	Lipid Metabolism	1.14.-.-	Unigene25625_A0A	N	0	1000	0	2
R06520	3-sn-phosphatidate phosphohydrolase	[c] : C01120 + C00001 <==> C00836 + C00009	Sphingolipid metabolism	Lipid Metabolism	3.1.3.4;3.1.3.-	( Unigene4984_A0A and Unigene40967_A0A and Unigene39158_A0A and Unigene51808_A0A and Unigene49912_A0A ) or ( Unigene21841_A0A and Unigene49913_A0A )	N	0	1000	0	2
R06521	3-sn-phosphatidate phosphohydrolase	[c] : C06124 + C00001 <==> C00319 + C00009	Sphingolipid metabolism	Lipid Metabolism	3.1.3.4;3.1.3.-	( Unigene4984_A0A and Unigene40967_A0A and Unigene39158_A0A and Unigene51808_A0A and Unigene49912_A0A ) or ( Unigene21841_A0A and Unigene49913_A0A )	N	0	1000	0	2
R06522	3-sn-phosphatidate phosphohydrolase	[c] : C02960 + C00001 <==> C00195 + C00009	Sphingolipid metabolism	Lipid Metabolism	3.1.3.4;3.1.3.-	( Unigene4984_A0A and Unigene40967_A0A and Unigene39158_A0A and Unigene51808_A0A and Unigene49912_A0A ) or ( Unigene21841_A0A and Unigene49913_A0A )	N	0	1000	0	2
R06573	formation of 5-Hydroxyconiferyl alcohol	[c] : C00590 + C00005 + C00080 + C00007 <==> C12205 + C00006 + C00001	Phenylpropanoid biosynthesis	Biosynthesis of Other Secondary Metabolites	1.14.13.-		N	0	1000	0	1
R06577	S-adenosyl-L-methionine:3,4-dihydroxy-trans-cinnamate 3-O-methyltransferase	[c] : C12205 + C00019 <==> C02325 + C00021	Phenylpropanoid biosynthesis	Biosynthesis of Other Secondary Metabolites	2.1.1.68		N	0	1000	0	1
R06578	S-adenosyl-L-methionine:caffeoyl-CoA 3-O-methyltransferase	[c] : C12203 + C00019 <==> C00411 + C00021	Phenylpropanoid biosynthesis	Biosynthesis of Other Secondary Metabolites	2.1.1.104		N	0	1000	0	1
R06583	4-coumarate:CoA ligase (AMP-forming)	[c] : C05619 + C00010 + C00002 <==> C12203 + C00020 + C00013	Phenylpropanoid biosynthesis	Biosynthesis of Other Secondary Metabolites	6.2.1.12	( Unigene31572_A0A and Unigene2607_A0A and Unigene30069_A0A and Unigene54439_A0A ) or ( Unigene52306_A0A and Unigene615_A0A )	N	0	1000	0	2
R06584	formation of 5-Hydroxyferuloyl-CoA	[c] : C00406 <==> C12203	Phenylpropanoid biosynthesis	Biosynthesis of Other Secondary Metabolites			N	0	1000	0	1
R06590	sedoheptulose-7-phosphate:D-glyceraldehyde-3-phosphate glycolaldehydetransferase;sedoheptulose-7-phosphate:D-glyceraldehyde-3-phosphate glycolaldehydetransferase	[c] : C12214 + C00117 <==> C12215 + C05382	Biosynthesis of ansamycins	Metabolism of Terpenoids and Polyketides	2.2.1.1	Unigene20167_A0A	N	0	1000	0	2
R06601	5-hydroxyisourate amidohydrolase	[c] : C11821 + C00001 <==> C12248	Purine metabolism	Nucleotide Metabolism	3.5.2.17	Unigene10532_A0A	N	0	1000	0	2
R06604	2-oxo-4-hydroxy-4-carboxy-5-ureidoimidazoline decarboxylase	[c] : C12248 <==> C02350 + C00011	Purine metabolism	Nucleotide Metabolism	4.1.1.-	Unigene30007_A0A	N	0	1000	0	2
R06614	3-cyano-L-alanine carboxy-lyase (3-aminopropiononitrile-forming)	[c] : C02512 <==> C05670 + C00011	Cyanoamino acid metabolism	Metabolism of Other Amino Acids	4.1.1.-		N	0	1000	0	1
R06722	alpha 1,2-mannosyloligosaccharide alpha-D-mannohydrolase	[c] : C00001 + G00011 <==> C00159 + G10694	Various types of N-glycan biosynthesis	Glycan Biosynthesis and Metabolism	3.2.1.113	( Unigene54051_A0A and Unigene56218_A0A and Unigene23035_A0A and Unigene56732_A0A and Unigene34134_A0A )	N	0	1000	0	2
R06728	cocaine benzoylhydrolase	[c] : C01416 + C00001 <==> C12448 + C00180	Tropane, piperidine and pyridine alkaloid biosynthesis	Biosynthesis of Other Secondary Metabolites	3.1.1.1;3.1.1.84	( Unigene7966_A0A and Unigene16186_A0A and Unigene15728_A0A and Unigene1048_A0A ) or ( Unigene7053_A0A and Unigene5583_A0A and Unigene54036_A0A )	N	0	1000	0	2
R06745	formation of Cocaine	[c] : C00423 <==> C01416	Tropane, piperidine and pyridine alkaloid biosynthesis	Biosynthesis of Other Secondary Metabolites			Y	-1000	1000	0	1
R06790	formation of 4-Hydroxyphenylacetate	[c] : C07086 <==> C00642	Phenylalanine metabolism	Amino Acid Metabolism			N	0	1000	0	1
R06865	formation of 3-Hexaprenyl-4,5-dihydroxybenzoate	[c] : C13425 + C00007 <==> C05200	Ubiquinone and other terpenoid-quinone biosynthesis	Metabolism of Cofactors and Vitamins			N	0	1000	0	1
R06870	Phosphoethanolamine phosphohydrolase	[c] : C00346 + C00001 <==> C00189 + C00009	Glycerophospholipid metabolism	Lipid Metabolism	3.1.3.75		N	0	1000	0	1
R06895	coproporphyrinogen-III:S-adenosyl-L-methionine oxidoreductase(decarboxylating)	[c] : C03263 + 2 C00019 <==> C01079 + 2 C00011 + 2 C00073 + 2 C05198	Porphyrin and chlorophyll metabolism	Metabolism of Cofactors and Vitamins	1.3.99.22		N	0	1000	0	1
R06917	1-hydroxymethylnaphthalene:NAD+ oxidoreductase	[c] : C14089 + C00003 <==> C14090 + C00004 + C00080	Naphthalene degradation	Xenobiotics Biodegradation and Metabolism	1.1.1.1	( Unigene20718_A0A ) or ( Unigene49428_A0A )	N	0	1000	0	2
R06927	(2-naphthyl)methanol:NAD+ oxidoreductase	[c] : C02909 + C00003 <==> C14099 + C00004 + C00080	Naphthalene degradation	Xenobiotics Biodegradation and Metabolism	1.1.1.1	( Unigene20718_A0A ) or ( Unigene49428_A0A )	N	0	1000	0	2
R06941	(S)-3-hydroxyacyl-CoA:NAD+ oxidoreductase	[c] : C14145 + C00003 <==> C02232 + C00004 + C00080	Caprolactam degradation	Xenobiotics Biodegradation and Metabolism	1.1.1.35	Unigene8033_A0A	N	0	1000	0	2
R06942	(3S)-3-hydroxyacyl-CoA hydro-lyase	[c] : C14144 + C00001 <==> C14145	Caprolactam degradation	Xenobiotics Biodegradation and Metabolism	4.2.1.17	( Unigene26354_A0A and Unigene44656_A0A and Unigene25565_A0A and Unigene14392_A0A and Unigene55152_A0A and Unigene31479_A0A and Unigene11708_A0A and Unigene29182_A0A )	N	0	1000	0	2
R06982	S-(hydroxymethyl)glutathione synthase	[c] : C00051 + C00067 <==> C14180	Methane metabolism	Energy Metabolism	4.4.1.22		Y	-1000	1000	0	1
R06983	S-(hydroxymethyl)glutathione dehydrogenase	[c] : C14180 + C00003 <==> C01031 + C00004 + C00080	Methane metabolism	Energy Metabolism	1.1.1.284	Unigene49428_A0A	N	0	1000	0	2
R06985	trans-Hex-2-enoyl-CoA reductase	[c] : C05271 + C00005 + C00080 <==> C05270 + C00006	Fatty acid elongation in mitochondria	Lipid Metabolism	1.3.1.8;1.3.1.38	( Unigene28257_A0A and Unigene41946_A0A and Unigene52592_A0A )	N	0	1000	0	2
R06987	propanoyl-CoA:formate C-propanoyltransferase	[c] : C00109 + C00010 <==> C00100 + C00058	Propanoate metabolism	Carbohydrate Metabolism	2.3.1.54		Y	-1000	1000	0	1
R07000	Naphthalene, NADPH:oxygen oxidoreductase (RH-hydroxylating or -epoxidizing)	[c] : C00829 + C00005 + C00007 + C00080 <==> C14786 + C00006 + C00001	Metabolism of xenobiotics by cytochrome P450	Xenobiotics Biodegradation and Metabolism	1.14.14.1	( Unigene16037_A0A and Unigene1928_A0A and Unigene17247_A0A ) or ( Unigene47728_A0A )	N	0	1000	0	2
R07001	Naphthalene, NADPH:oxygen oxidoreductase (RH-hydroxylating or -epoxidizing)	[c] : C00829 + C00005 + C00007 + C00080 <==> C14787 + C00006 + C00001	Metabolism of xenobiotics by cytochrome P450	Xenobiotics Biodegradation and Metabolism	1.14.14.1	( Unigene16037_A0A and Unigene1928_A0A and Unigene17247_A0A ) or ( Unigene47728_A0A )	N	0	1000	0	2
R07002	(1R)-hydroxy-(2R)-glutathionyl-1,2-dihydronaphthalene glutathione-lyase (epoxide-forming)	[c] : C14786 + C00051 <==> C14791	Metabolism of xenobiotics by cytochrome P450	Xenobiotics Biodegradation and Metabolism	2.5.1.18	( Unigene19265_A0A and Unigene20954_A0A and Unigene20526_A0A and Unigene25462_A0A and Unigene8197_A0A and Unigene9592_A0A and Unigene39496_A0A and Unigene48309_A0A and Unigene49719_A0A and Unigene42745_A0A and Unigene30993_A0A and Unigene29077_A0A and Unigene56349_A0A ) or ( Unigene12031_A0A )	N	0	1000	0	2
R07003	(1R)-glutathionyl-(2R)-hydroxy-1,2-dihydronaphthalene glutathione-lyase (epoxide-forming)	[c] : C14787 + C00051 <==> C14793	Metabolism of xenobiotics by cytochrome P450	Xenobiotics Biodegradation and Metabolism	2.5.1.18	( Unigene19265_A0A and Unigene20954_A0A and Unigene20526_A0A and Unigene25462_A0A and Unigene8197_A0A and Unigene9592_A0A and Unigene39496_A0A and Unigene48309_A0A and Unigene49719_A0A and Unigene42745_A0A and Unigene30993_A0A and Unigene29077_A0A and Unigene56349_A0A ) or ( Unigene12031_A0A )	N	0	1000	0	2
R07004	(1S)-hydroxy-(2S)-glutathionyl-1,2-dihydronaphthalene glutathione-lyase (epoxide-forming)	[c] : C14787 + C00051 <==> C14792	Metabolism of xenobiotics by cytochrome P450	Xenobiotics Biodegradation and Metabolism	2.5.1.18	( Unigene19265_A0A and Unigene20954_A0A and Unigene20526_A0A and Unigene25462_A0A and Unigene8197_A0A and Unigene9592_A0A and Unigene39496_A0A and Unigene48309_A0A and Unigene49719_A0A and Unigene42745_A0A and Unigene30993_A0A and Unigene29077_A0A and Unigene56349_A0A ) or ( Unigene12031_A0A )	N	0	1000	0	2
R07011	formation of 2-Naphthol	[c] : C14786 <==> C11713	Metabolism of xenobiotics by cytochrome P450	Xenobiotics Biodegradation and Metabolism			N	0	1000	0	1
R07012	formation of 2-Naphthol	[c] : C14787 <==> C11713	Metabolism of xenobiotics by cytochrome P450	Xenobiotics Biodegradation and Metabolism			N	0	1000	0	1
R07013	(1R,2S)-naphthalene 1,2-oxide hydrolase	[c] : C14786 + C00001 <==> C06205	Metabolism of xenobiotics by cytochrome P450	Xenobiotics Biodegradation and Metabolism	3.3.2.9	Unigene21001_A0A	N	0	1000	0	2
R07014	(1S,2R)-naphthalene 1,2-oxide hydrolase	[c] : C14787 + C00001 <==> C06205	Metabolism of xenobiotics by cytochrome P450	Xenobiotics Biodegradation and Metabolism	3.3.2.9	Unigene21001_A0A	N	0	1000	0	2
R07015	1,2-Dihydronaphthalene-1,2-diol dehydrogenase	[c] : C06205 + C00006 <==> C03012 + C00005 + C00080	Metabolism of xenobiotics by cytochrome P450	Xenobiotics Biodegradation and Metabolism	1.3.1.20	Unigene16653_A0A	N	0	1000	0	2
R07016	1,2-Dihydronaphthalene-1,2-diol, NADPH:oxygen oxidoreductase (RH-hydroxylating or -epoxidizing)	[c] : C06205 + C00005 + C00007 + C00080 <==> C14784 + C00006 + C00001	Metabolism of xenobiotics by cytochrome P450	Xenobiotics Biodegradation and Metabolism	1.14.14.1	( Unigene16037_A0A and Unigene1928_A0A and Unigene17247_A0A ) or ( Unigene47728_A0A )	N	0	1000	0	2
R07020	beta-Naphthol, NADPH:oxygen oxidoreductase (RH-hydroxylating or -epoxidizing)	[c] : C11713 + C00005 + C00007 + C00080 <==> C03012 + C00006 + C00001	Metabolism of xenobiotics by cytochrome P450	Xenobiotics Biodegradation and Metabolism	1.14.14.1	( Unigene16037_A0A and Unigene1928_A0A and Unigene17247_A0A ) or ( Unigene47728_A0A )	N	0	1000	0	2
R07021	1-Nitronaphthalene, NADPH:oxygen oxidoreductase (RH-hydroxylating or -epoxidizing)	[c] : C14040 + C00005 + C00007 + C00080 <==> C14802 + C00006 + C00001	Metabolism of xenobiotics by cytochrome P450	Xenobiotics Biodegradation and Metabolism	1.14.14.1	( Unigene1928_A0A and Unigene17247_A0A ) or ( Unigene47728_A0A )	N	0	1000	0	2
R07022	1-Nitronaphthalene, NADPH:oxygen oxidoreductase (RH-hydroxylating or -epoxidizing)	[c] : C14040 + C00005 + C00007 + C00080 <==> C14800 + C00006 + C00001	Metabolism of xenobiotics by cytochrome P450	Xenobiotics Biodegradation and Metabolism	1.14.14.1	( Unigene1928_A0A and Unigene17247_A0A ) or ( Unigene47728_A0A )	N	0	1000	0	2
R07023	1-nitro-7-hydroxy-8-glutathionyl-7,8-dihydronaphthalene glutathione-lyase (epoxide-forming)	[c] : C14802 + C00051 <==> C14803	Metabolism of xenobiotics by cytochrome P450	Xenobiotics Biodegradation and Metabolism	2.5.1.18	( Unigene19265_A0A and Unigene20954_A0A and Unigene20526_A0A and Unigene25462_A0A and Unigene8197_A0A and Unigene9592_A0A and Unigene39496_A0A and Unigene48309_A0A and Unigene49719_A0A and Unigene42745_A0A and Unigene30993_A0A and Unigene29077_A0A and Unigene56349_A0A ) or ( Unigene12031_A0A )	N	0	1000	0	2
R07024	1-nitro-7-glutathionyl-8-hydroxy-7,8-dihydronaphthalene glutathione-lyase (epoxide-forming)	[c] : C14802 + C00051 <==> C14804	Metabolism of xenobiotics by cytochrome P450	Xenobiotics Biodegradation and Metabolism	2.5.1.18	( Unigene19265_A0A and Unigene20954_A0A and Unigene20526_A0A and Unigene25462_A0A and Unigene8197_A0A and Unigene9592_A0A and Unigene39496_A0A and Unigene48309_A0A and Unigene49719_A0A and Unigene42745_A0A and Unigene30993_A0A and Unigene29077_A0A and Unigene56349_A0A ) or ( Unigene12031_A0A )	N	0	1000	0	2
R07025	1-nitro-5-hydroxy-6-glutathionyl-5,6-dihydronaphthalene glutathione-lyase (epoxide-forming)	[c] : C14800 + C00051 <==> C14805	Metabolism of xenobiotics by cytochrome P450	Xenobiotics Biodegradation and Metabolism	2.5.1.18	( Unigene19265_A0A and Unigene20954_A0A and Unigene20526_A0A and Unigene25462_A0A and Unigene8197_A0A and Unigene9592_A0A and Unigene39496_A0A and Unigene48309_A0A and Unigene49719_A0A and Unigene42745_A0A and Unigene30993_A0A and Unigene29077_A0A and Unigene56349_A0A ) or ( Unigene12031_A0A )	N	0	1000	0	2
R07026	1-nitro-5-glutathionyl-6-hydroxy-5,6-dihydronaphthalene glutathione-lyase (epoxide-forming)	[c] : C14800 + C00051 <==> C14806	Metabolism of xenobiotics by cytochrome P450	Xenobiotics Biodegradation and Metabolism	2.5.1.18	( Unigene19265_A0A and Unigene20954_A0A and Unigene20526_A0A and Unigene25462_A0A and Unigene8197_A0A and Unigene9592_A0A and Unigene39496_A0A and Unigene48309_A0A and Unigene49719_A0A and Unigene42745_A0A and Unigene30993_A0A and Unigene29077_A0A and Unigene56349_A0A ) or ( Unigene12031_A0A )	N	0	1000	0	2
R07027	1-nitronaphthalene-5,6-oxide hydrolase	[c] : C14800 + C00001 <==> C14801	Metabolism of xenobiotics by cytochrome P450	Xenobiotics Biodegradation and Metabolism	3.3.2.9	Unigene21001_A0A	N	0	1000	0	2
R07034	Glutathione: 5-HPETE oxidoreductase	[c] : 2 C00051 + C05356 <==> C00127 + C04805 + C00001	Arachidonic acid metabolism	Lipid Metabolism	1.11.1.9	( Unigene19592_A0A and Unigene13898_A0A and Unigene2035_A0A and CL86.Contig2_A0A and CL86.Contig1_A0A )	N	0	1000	0	2
R07035	Glutathione: 15-HPETE oxidoreductase	[c] : 2 C00051 + C05966 <==> C00127 + C04742 + C00001	Arachidonic acid metabolism	Lipid Metabolism	1.11.1.9	( Unigene19592_A0A and Unigene13898_A0A and Unigene2035_A0A and CL86.Contig2_A0A and CL86.Contig1_A0A )	N	0	1000	0	2
R07038	Arachidonate: oxygen 12-oxidoreductase	[c] : C00219 + C00007 <==> C14812	Arachidonic acid metabolism	Lipid Metabolism	1.13.11.-	Unigene45097_A0A	N	0	1000	0	2
R07042	formation of 15H-11,12-EETA	[c] : C05966 <==> C14781	Arachidonic acid metabolism	Lipid Metabolism	1.14.14.1	( Unigene56756_A0A and Unigene54438_A0A and Unigene17263_A0A and Unigene1928_A0A ) or ( Unigene15980_A0A )	N	0	1000	0	2
R07043	formation of 11H-14,15-EETA	[c] : C05966 <==> C14813	Arachidonic acid metabolism	Lipid Metabolism	1.14.14.1	( Unigene56756_A0A and Unigene54438_A0A and Unigene17263_A0A and Unigene1928_A0A ) or ( Unigene15980_A0A )	N	0	1000	0	2
R07044	formation of 11,12,15-THETA	[c] : C14781 + C00001 <==> C14782	Arachidonic acid metabolism	Lipid Metabolism	1.14.14.1	( Unigene56756_A0A and Unigene54438_A0A )	N	0	1000	0	2
R07045	formation of 11,14,15-THETA	[c] : C14813 + C00001 <==> C14814	Arachidonic acid metabolism	Lipid Metabolism	1.14.14.1	( Unigene56756_A0A and Unigene54438_A0A )	N	0	1000	0	2
R07046	formation of 19(S)-HETE	[c] : C00219 + C00007 + C00005 + C00080 <==> C14749 + C00006 + C00001	Arachidonic acid metabolism	Lipid Metabolism	1.14.14.1	( Unigene56756_A0A and Unigene54438_A0A )	N	0	1000	0	2
R07048	formation of 14,15-EET	[c] : C00219 + C00007 + C00005 + C00080 <==> C14771 + C00006 + C00001	Arachidonic acid metabolism	Lipid Metabolism	1.14.14.1	( Unigene56756_A0A and Unigene54438_A0A and Unigene17263_A0A and Unigene1928_A0A and Unigene17247_A0A ) or ( Unigene47728_A0A and Unigene15980_A0A )	N	0	1000	0	2
R07050	formation of 11,12-EET	[c] : C00219 + C00007 + C00005 + C00080 <==> C14770 + C00006 + C00001	Arachidonic acid metabolism	Lipid Metabolism	1.14.14.1	( Unigene56756_A0A and Unigene54438_A0A and Unigene17263_A0A and Unigene1928_A0A and Unigene17247_A0A ) or ( Unigene47728_A0A and Unigene15980_A0A )	N	0	1000	0	2
R07051	formation of 8,9-EET	[c] : C00219 + C00007 + C00005 + C00080 <==> C14769 + C00006 + C00001	Arachidonic acid metabolism	Lipid Metabolism	1.14.14.1	( Unigene56756_A0A and Unigene54438_A0A and Unigene17263_A0A and Unigene1928_A0A and Unigene17247_A0A ) or ( Unigene47728_A0A and Unigene15980_A0A )	N	0	1000	0	2
R07052	formation of 5,6-EET	[c] : C00219 + C00007 + C00005 + C00080 <==> C14768 + C00006 + C00001	Arachidonic acid metabolism	Lipid Metabolism	1.14.14.1	( Unigene56756_A0A and Unigene54438_A0A and Unigene17263_A0A and Unigene1928_A0A and Unigene17247_A0A ) or ( Unigene47728_A0A and Unigene15980_A0A )	N	0	1000	0	2
R07054	formation of 16(R)-HETE	[c] : C00219 + C00007 + C00005 + C00080 <==> C14778 + C00006 + C00001	Arachidonic acid metabolism	Lipid Metabolism	1.14.14.1	( Unigene17263_A0A and Unigene1928_A0A ) or ( Unigene15980_A0A )	N	0	1000	0	2
R07055	formation of 9(10)-EpOME	[c] : C01595 + C00007 + C00005 + C00080 <==> C14825 + C00006 + C00001	Linoleic acid metabolism	Lipid Metabolism	1.14.14.1	( CL367.Contig1_A0A and CL1618.Contig1_A0A and Unigene56756_A0A and Unigene54438_A0A and Unigene37775_A0A and Unigene17263_A0A and Unigene1928_A0A and Unigene28120_A0A and Unigene48800_A0A and Unigene20529_A0A and Unigene25620_A0A ) or ( Unigene15980_A0A and Unigene20555_A0A )	N	0	1000	0	2
R07056	formation of 12(13)-EpOME	[c] : C01595 + C00007 + C00005 + C00080 <==> C14826 + C00006 + C00001	Linoleic acid metabolism	Lipid Metabolism	1.14.14.1	( CL367.Contig1_A0A and CL1618.Contig1_A0A and Unigene56756_A0A and Unigene54438_A0A and Unigene37775_A0A and Unigene17263_A0A and Unigene1928_A0A and Unigene28120_A0A and Unigene48800_A0A and Unigene20529_A0A and Unigene25620_A0A ) or ( Unigene15980_A0A and Unigene20555_A0A )	N	0	1000	0	2
R07064	Phosphatidylcholine 2-acylhydrolase	[c] : C00157 + C00001 <==> C04230 + C01595	Linoleic acid metabolism	Lipid Metabolism	3.1.1.4	( Unigene53786_A0A and Unigene13551_A0A and Unigene43493_A0A and Unigene35949_A0A and Unigene29770_A0A and Unigene33536_A0A and Unigene4234_A0A and Unigene45757_A0A and Unigene18772_A0A and Unigene14829_A0A and Unigene39126_A0A and Unigene53444_A0A and Unigene17160_A0A and Unigene27877_A0A )	N	0	1000	0	2
R07066	Bromobenzene, NADPH:oxygen oxidoreductase (RH-hydroxylating or -epoxidizing)	[c] : C11036 + C00005 + C00007 + C00080 <==> C14839 + C00006 + C00001	Metabolism of xenobiotics by cytochrome P450	Xenobiotics Biodegradation and Metabolism	1.14.14.1	( Unigene1928_A0A and Unigene17247_A0A ) or ( Unigene47728_A0A )	N	0	1000	0	2
R07068	Bromobenzene, NADPH:oxygen oxidoreductase (RH-hydroxylating or -epoxidizing)	[c] : C11036 + C00005 + C00007 + C00080 <==> C14840 + C00006 + C00001	Metabolism of xenobiotics by cytochrome P450	Xenobiotics Biodegradation and Metabolism	1.14.14.1	( Unigene1928_A0A and Unigene17247_A0A ) or ( Unigene47728_A0A )	N	0	1000	0	2
R07069	3,4-dihydro-3-hydroxy-4-S-glutathionyl bromobenzene glutathione-lyase (epoxide-forming)	[c] : C14839 + C00051 <==> C14847	Metabolism of xenobiotics by cytochrome P450	Xenobiotics Biodegradation and Metabolism	2.5.1.18	( Unigene19265_A0A and Unigene20954_A0A and Unigene20526_A0A and Unigene25462_A0A and Unigene8197_A0A and Unigene9592_A0A and Unigene39496_A0A and Unigene48309_A0A and Unigene49719_A0A and Unigene42745_A0A and Unigene30993_A0A and Unigene29077_A0A and Unigene56349_A0A ) or ( Unigene12031_A0A )	N	0	1000	0	2
R07070	2,3-dihydro-2-S-glutathionyl-3-hydroxy bromobenzene glutathione-lyase (epoxide-forming)	[c] : C14840 + C00051 <==> C14848	Metabolism of xenobiotics by cytochrome P450	Xenobiotics Biodegradation and Metabolism	2.5.1.18	( Unigene19265_A0A and Unigene20954_A0A and Unigene20526_A0A and Unigene25462_A0A and Unigene8197_A0A and Unigene9592_A0A and Unigene39496_A0A and Unigene48309_A0A and Unigene49719_A0A and Unigene42745_A0A and Unigene30993_A0A and Unigene29077_A0A and Unigene56349_A0A ) or ( Unigene12031_A0A )	N	0	1000	0	2
R07071	bromobenzene-3,4-oxide hydrolase	[c] : C14839 + C00001 <==> C14844	Metabolism of xenobiotics by cytochrome P450	Xenobiotics Biodegradation and Metabolism	3.3.2.9	Unigene21001_A0A	N	0	1000	0	2
R07072	bromobenzene-2,3-oxide hydrolase	[c] : C14840 + C00001 <==> C14842	Metabolism of xenobiotics by cytochrome P450	Xenobiotics Biodegradation and Metabolism	3.3.2.9	Unigene21001_A0A	N	0	1000	0	2
R07073	formation of 4-Bromophenol	[c] : C14839 <==> C14453	Metabolism of xenobiotics by cytochrome P450	Xenobiotics Biodegradation and Metabolism			N	0	1000	0	1
R07075	4-Bromophenol, NADPH:oxygen oxidoreductase (RH-hydroxylating or -epoxidizing)	[c] : C14453 + C00005 + C00007 + C00080 <==> C14845 + C00006 + C00001	Metabolism of xenobiotics by cytochrome P450	Xenobiotics Biodegradation and Metabolism	1.14.14.1	( Unigene1928_A0A and Unigene17247_A0A ) or ( Unigene47728_A0A )	N	0	1000	0	2
R07079	Benzpyrene, NADPH:oxygen oxidoreductase (RH-hydroxylating or -epoxidizing)	[c] : C07535 + C00005 + C00007 + C00080 <==> C14849 + C00006 + C00001	Metabolism of xenobiotics by cytochrome P450	Xenobiotics Biodegradation and Metabolism	1.14.14.1	( CL367.Contig1_A0A and CL1618.Contig1_A0A and Unigene37775_A0A and Unigene17263_A0A and Unigene1928_A0A and Unigene28120_A0A and Unigene48800_A0A and Unigene20529_A0A and Unigene25620_A0A ) or ( Unigene15980_A0A and Unigene20555_A0A )	N	0	1000	0	2
R07080	Benzpyrene,NADPH:oxygen oxidoreductase (RH-hydroxylating or -epoxidizing)	[c] : C07535 + C00005 + C00007 + C00080 <==> C14850 + C00006 + C00001	Metabolism of xenobiotics by cytochrome P450	Xenobiotics Biodegradation and Metabolism	1.14.14.1	( CL367.Contig1_A0A and CL1618.Contig1_A0A and Unigene37775_A0A and Unigene17263_A0A and Unigene1928_A0A and Unigene28120_A0A and Unigene48800_A0A and Unigene20529_A0A and Unigene25620_A0A ) or ( Unigene15980_A0A and Unigene20555_A0A )	N	0	1000	0	2
R07081	Benzpyrene,NADPH:oxygen oxidoreductase (RH-hydroxylating or -epoxidizing)	[c] : C07535 + C00005 + C00007 + C00080 <==> C14851 + C00006 + C00001	Metabolism of xenobiotics by cytochrome P450	Xenobiotics Biodegradation and Metabolism	1.14.14.1	( CL367.Contig1_A0A and CL1618.Contig1_A0A and Unigene37775_A0A and Unigene17263_A0A and Unigene1928_A0A and Unigene28120_A0A and Unigene48800_A0A and Unigene20529_A0A and Unigene25620_A0A ) or ( Unigene15980_A0A and Unigene20555_A0A )	N	0	1000	0	2
R07082	benzo[a]pyrene-7,8-oxide hydrolase	[c] : C14850 + C00001 <==> C14852	Metabolism of xenobiotics by cytochrome P450	Xenobiotics Biodegradation and Metabolism	3.3.2.9	Unigene21001_A0A	N	0	1000	0	2
R07083	4,5-dihydro-4-hydroxy-5-S-glutathionyl-benzo[a]pyrene glutathione-lyase (epoxide-forming)	[c] : C14851 + C00051 <==> C14855	Metabolism of xenobiotics by cytochrome P450	Xenobiotics Biodegradation and Metabolism	2.5.1.18	( Unigene19265_A0A and Unigene20954_A0A and Unigene20526_A0A and Unigene25462_A0A and Unigene8197_A0A and Unigene9592_A0A and Unigene39496_A0A and Unigene48309_A0A and Unigene49719_A0A and Unigene42745_A0A and Unigene30993_A0A and Unigene29077_A0A and Unigene56349_A0A ) or ( Unigene12031_A0A )	N	0	1000	0	2
R07084	7,8-dihydro-7-hydroxy-8-S-glutathionyl-benzo[a]pyrene hydrolase	[c] : C14852 + C00051 <==> C14856 + C00001	Metabolism of xenobiotics by cytochrome P450	Xenobiotics Biodegradation and Metabolism	2.5.1.18	( Unigene19265_A0A and Unigene20954_A0A and Unigene20526_A0A and Unigene25462_A0A and Unigene8197_A0A and Unigene9592_A0A and Unigene39496_A0A and Unigene48309_A0A and Unigene49719_A0A and Unigene42745_A0A and Unigene30993_A0A and Unigene29077_A0A and Unigene56349_A0A ) or ( Unigene12031_A0A )	N	0	1000	0	2
R07085	Benzo[a]pyrene-7,8-diol, NADPH:oxygen oxidoreductase (RH-hydroxylating or -epoxidizing)	[c] : C14852 + C00005 + C00007 + C00080 <==> C14853 + C00006 + C00001	Metabolism of xenobiotics by cytochrome P450	Xenobiotics Biodegradation and Metabolism	1.14.14.1	( CL367.Contig1_A0A and CL1618.Contig1_A0A and Unigene37775_A0A and Unigene17263_A0A and Unigene1928_A0A and Unigene28120_A0A and Unigene48800_A0A and Unigene20529_A0A and Unigene25620_A0A ) or ( Unigene15980_A0A and Unigene20555_A0A )	N	0	1000	0	2
R07086	formation of 9-Hydroxybenzo[a]pyrene	[c] : C14849 <==> C14556	Metabolism of xenobiotics by cytochrome P450	Xenobiotics Biodegradation and Metabolism			N	0	1000	0	1
R07087	9-Hydroxybenzo[a]pyrene, NADPH:oxygen oxidoreductase (RH-hydroxylating or -epoxidizing)	[c] : C14556 + C00005 + C00007 + C00080 <==> C14854 + C00006 + C00001	Metabolism of xenobiotics by cytochrome P450	Xenobiotics Biodegradation and Metabolism	1.14.14.1	( CL367.Contig1_A0A and CL1618.Contig1_A0A and Unigene37775_A0A and Unigene17263_A0A and Unigene1928_A0A and Unigene28120_A0A and Unigene48800_A0A and Unigene20529_A0A and Unigene25620_A0A ) or ( Unigene15980_A0A and Unigene20555_A0A )	N	0	1000	0	2
R07091	S-(2,2-dichloro-1-hydroxy)ethyl-glutathione 2,2-dichloroacetaldehyde-lyase (glutathione-forming)	[c] : C14858 + C00051 <==> C14861	Metabolism of xenobiotics by cytochrome P450	Xenobiotics Biodegradation and Metabolism	2.5.1.18	( Unigene19265_A0A and Unigene20954_A0A and Unigene20526_A0A and Unigene25462_A0A and Unigene8197_A0A and Unigene9592_A0A and Unigene39496_A0A and Unigene48309_A0A and Unigene49719_A0A and Unigene42745_A0A and Unigene30993_A0A and Unigene29077_A0A and Unigene56349_A0A ) or ( Unigene12031_A0A )	N	0	1000	0	2
R07092	1,1-dichloroethylene-epoxide:glutathione S-(chloroepoxyethyl)transferase [2-(S-glutathionyl)acetyl-chloride-forming]	[c] : C14857 + C00051 <==> C14865 + C01327	Metabolism of xenobiotics by cytochrome P450	Xenobiotics Biodegradation and Metabolism	2.5.1.18	( Unigene19265_A0A and Unigene20954_A0A and Unigene20526_A0A and Unigene25462_A0A and Unigene8197_A0A and Unigene9592_A0A and Unigene39496_A0A and Unigene48309_A0A and Unigene49719_A0A and Unigene42745_A0A and Unigene30993_A0A and Unigene29077_A0A and Unigene56349_A0A ) or ( Unigene12031_A0A )	N	0	1000	0	2
R07093	chloroacetyl-chloride:glutathione S-chloroacetyltransferase	[c] : C14859 + C00051 <==> C14864 + C01327	Metabolism of xenobiotics by cytochrome P450	Xenobiotics Biodegradation and Metabolism	2.5.1.18	( Unigene19265_A0A and Unigene20954_A0A and Unigene20526_A0A and Unigene25462_A0A and Unigene8197_A0A and Unigene9592_A0A and Unigene39496_A0A and Unigene48309_A0A and Unigene49719_A0A and Unigene42745_A0A and Unigene30993_A0A and Unigene29077_A0A and Unigene56349_A0A ) or ( Unigene12031_A0A )	N	0	1000	0	2
R07094	2-(S-glutathionyl)acetyl-chloride:glutathione 2-(S-glutathionyl)acetyltransferase	[c] : C14865 + C00051 <==> C14863 + C01327	Metabolism of xenobiotics by cytochrome P450	Xenobiotics Biodegradation and Metabolism	2.5.1.18	( Unigene19265_A0A and Unigene20954_A0A and Unigene20526_A0A and Unigene25462_A0A and Unigene8197_A0A and Unigene9592_A0A and Unigene39496_A0A and Unigene48309_A0A and Unigene49719_A0A and Unigene42745_A0A and Unigene30993_A0A and Unigene29077_A0A and Unigene56349_A0A ) or ( Unigene12031_A0A )	N	0	1000	0	2
R07096	formation of Chloroacetic acid	[c] : C14859 + C00001 <==> C06755	Metabolism of xenobiotics by cytochrome P450	Xenobiotics Biodegradation and Metabolism			N	0	1000	0	1
R07098	Trichloroethene, NADPH:oxygen oxidoreductase (RH-hydroxylating or -epoxidizing)	[c] : C06790 + C00005 + C00007 + C00080 <==> C11148 + C00006 + C00001	Metabolism of xenobiotics by cytochrome P450	Xenobiotics Biodegradation and Metabolism	1.14.14.1	( Unigene1928_A0A and Unigene17247_A0A ) or ( Unigene47728_A0A )	N	0	1000	0	2
R07099	Trichloroethene, NADPH:oxygen oxidoreductase (RH-hydroxylating or -epoxidizing)	[c] : C06790 + C00005 + C00007 + C00080 <==> C14866 + C00006 + C00001	Metabolism of xenobiotics by cytochrome P450	Xenobiotics Biodegradation and Metabolism	1.14.14.1	( Unigene1928_A0A and Unigene17247_A0A ) or ( Unigene47728_A0A )	N	0	1000	0	2
R07100	trichloroethene:glutathione S-(1,2-dichlorovinyl)transferase	[c] : C06790 + C00051 <==> C14868 + C01327	Metabolism of xenobiotics by cytochrome P450	Xenobiotics Biodegradation and Metabolism	2.5.1.18	( Unigene19265_A0A and Unigene20954_A0A and Unigene20526_A0A and Unigene25462_A0A and Unigene8197_A0A and Unigene9592_A0A and Unigene39496_A0A and Unigene48309_A0A and Unigene49719_A0A and Unigene42745_A0A and Unigene30993_A0A and Unigene29077_A0A and Unigene56349_A0A )	N	0	1000	0	2
R07101	formation of Chloral hydrate	[c] : C14866 + C00001 <==> C06899	Metabolism of xenobiotics by cytochrome P450	Xenobiotics Biodegradation and Metabolism			Y	-1000	1000	0	1
R07104	Chloral:NAD(P)+ oxidoreductase	[c] : C06899 + C00003 <==> C11150 + C00004 + C00080	Metabolism of xenobiotics by cytochrome P450	Xenobiotics Biodegradation and Metabolism	1.2.1.5	( Unigene25877_A0A and Unigene2472_A0A ) or ( Unigene48345_A0A )	N	0	1000	0	2
R07105	trichloroethanol:NAD+ oxidoreductase	[c] : C06899 + C00004 + C00080 <==> C07490 + C00003 + C00001	Metabolism of xenobiotics by cytochrome P450	Xenobiotics Biodegradation and Metabolism	1.1.1.1	( Unigene20718_A0A ) or ( Unigene49428_A0A )	N	0	1000	0	2
R07106	UDP-glucuronate beta-D-glucuronosyltransferase	[c] : C07490 + C00167 <==> C14869 + C00015	Metabolism of xenobiotics by cytochrome P450	Xenobiotics Biodegradation and Metabolism	2.4.1.17	( Unigene49795_A0A ) or ( Unigene49794_A0A and Unigene48897_A0A and Unigene14677_A0A and Unigene27751_A0A and Unigene44191_A0A and Unigene32852_A0A )	Y	-1000	1000	0	2
R07107	Trichloroethanol, NADPH:oxygen oxidoreductase (RH-hydroxylating or -epoxidizing)	[c] : C07490 + C00005 + C00007 + C00080 <==> C11150 + C00006 + C00001	Metabolism of xenobiotics by cytochrome P450	Xenobiotics Biodegradation and Metabolism	1.14.14.1	( Unigene1928_A0A and Unigene17247_A0A ) or ( Unigene47728_A0A )	N	0	1000	0	2
R07112	1,2-Dibromoethane,NADPH:oxygen oxidoreductase (RH-hydroxylating or -epoxidizing)	[c] : C11088 + C00005 + C00007 + C00080 <==> C14870 + C00006 + C00001 + C13645	Metabolism of xenobiotics by cytochrome P450	Xenobiotics Biodegradation and Metabolism	1.14.14.1		N	0	1000	0	1
R07113	1,2-dibromoethane:glutathione ethylenetransferase (episulfonium-forming)	[c] : C11088 + C00051 + C00080 <==> C14874 + 2 C13645	Metabolism of xenobiotics by cytochrome P450	Xenobiotics Biodegradation and Metabolism	2.5.1.18	( Unigene19265_A0A and Unigene20954_A0A and Unigene20526_A0A and Unigene25462_A0A and Unigene8197_A0A and Unigene9592_A0A and Unigene39496_A0A and Unigene48309_A0A and Unigene49719_A0A and Unigene42745_A0A and Unigene30993_A0A and Unigene29077_A0A and Unigene56349_A0A ) or ( Unigene12031_A0A )	N	0	1000	0	2
R07116	2-bromoacetaldehyde:glutathione S-(formylmethyl)transferase	[c] : C14870 + C00051 <==> C14871 + C13645	Metabolism of xenobiotics by cytochrome P450	Xenobiotics Biodegradation and Metabolism	2.5.1.18	( Unigene19265_A0A and Unigene20954_A0A and Unigene20526_A0A and Unigene25462_A0A and Unigene8197_A0A and Unigene9592_A0A and Unigene39496_A0A and Unigene48309_A0A and Unigene49719_A0A and Unigene42745_A0A and Unigene30993_A0A and Unigene29077_A0A and Unigene56349_A0A ) or ( Unigene12031_A0A )	N	0	1000	0	2
R07163	all-trans-13,14-dihydroretinol:acceptor 13,14-oxidoreductas	[c] : C00473 + C00030 <==> C15492 + C00028	Retinol metabolism	Metabolism of Cofactors and Vitamins	1.3.99.23	Unigene25406_A0A	N	0	1000	0	2
R07215	5alpha-cholest-7-en-3beta-ol, NADPH:oxygen 5-oxidoreductase	[c] : C01189 + C00005 + C00080 + C00007 <==> C01164 + C00006 + 2 C00001	Steroid biosynthesis	Lipid Metabolism	1.14.21.6	Unigene27721_A0A	N	0	1000	0	2
R07229	selenite:reduced acceptor oxidoreductase	[c] : C05697 + C00030 <==> C05684 + C00001 + C00028	Selenocompound metabolism	Metabolism of Other Amino Acids	1.97.1.9		N	0	1000	0	1
R07268	ATP:cobinamide Cobeta-adenosyltransferase	[c] : C00002 + C05774 <==> C00536 + C06508	Porphyrin and chlorophyll metabolism	Metabolism of Cofactors and Vitamins	2.5.1.17	Unigene11744_A0A	N	0	1000	0	2
R07299	1-phosphatidyl-1D-myo-inositol-3,4-bisphosphate 4-phosphohydrolase	[c] : C11554 + C00001 <==> C04549 + C00009	Inositol phosphate metabolism	Carbohydrate Metabolism	3.1.3.66	Unigene11205_A0A	N	0	1000	0	2
R07324	1D-myo-inositol-3-phosphate lyase (isomerizing)	[c] : C00092 <==> C04006	Streptomycin biosynthesis	Biosynthesis of Other Secondary Metabolites	5.5.1.4	( Unigene24863_A0A and Unigene55993_A0A and Unigene28085_A0A and Unigene11687_A0A )	N	0	1000	0	2
R07363	1,2-dihydroxy-5-(methylthio)pent-1-en-3-one:oxygen oxidoreductase (formate- and CO-forming)	[c] : C15606 + C00007 <==> C08276 + C00058 + C00237	Cysteine and methionine metabolism	Amino Acid Metabolism	1.13.11.53	Unigene2776_A0A	N	0	1000	0	2
R07364	1,2-dihydroxy-5-(methylthio)pent-1-en-3-one:oxygen oxidoreductase (formate-forming)	[c] : C15606 + C00007 <==> C01180 + C00058	Cysteine and methionine metabolism	Amino Acid Metabolism	1.13.11.54	Unigene2776_A0A	N	0	1000	0	2
R07376	L-1-phosphatidylethanolamine:L-serine phosphatidyltransferase	[c] : C00350 + C00065 <==> C02737 + C00189	Glycerophospholipid metabolism	Lipid Metabolism			N	0	1000	0	1
R07377	formation of Phosphatidylserine	[c] : C00157 + C00065 <==> C02737 + C00114	Glycerophospholipid metabolism	Lipid Metabolism			N	0	1000	0	1
R07379	Plasmenylethanolamine 2-acylhydrolase	[c] : C04756 + C00001 <==> C04635 + C00060	Ether lipid metabolism	Lipid Metabolism	3.1.1.4	( Unigene53786_A0A and Unigene13551_A0A and Unigene43493_A0A and Unigene35949_A0A and Unigene29770_A0A and Unigene33536_A0A and Unigene4234_A0A and Unigene45757_A0A and Unigene18772_A0A and Unigene14829_A0A and Unigene39126_A0A and Unigene53444_A0A and Unigene17160_A0A and Unigene27877_A0A )	N	0	1000	0	2
R07380	Lysoplasmalogen ethanolamine phosphohydrolase	[c] : C04635 + C00001 <==> C15645 + C00346	Ether lipid metabolism	Lipid Metabolism	3.1.4.-	( Unigene52704_A0A and Unigene36083_A0A and Unigene24357_A0A )	N	0	1000	0	2
R07384	formation of 1-Alkenyl-2-acylglycerol	[c] : C04756 + C00055 <==> C03454 + C00570	Ether lipid metabolism	Lipid Metabolism	2.7.8.1	( Unigene53516_A0A and Unigene36020_A0A and Unigene38540_A0A )	Y	-1000	1000	0	2
R07385	formation of 2-Acyl-1-(1-alkenyl)-sn-glycero-3-phosphate	[c] : C04756 + C00001 <==> C15647 + C00189	Ether lipid metabolism	Lipid Metabolism	3.1.4.4	( Unigene46312_A0A and Unigene45440_A0A and Unigene28697_A0A and Unigene47010_A0A and Unigene42461_A0A and Unigene52456_A0A and Unigene23240_A0A and Unigene3728_A0A and Unigene31456_A0A ) or ( Unigene32350_A0A )	N	0	1000	0	2
R07387	Plasmanylcholine 2-acylhydrolase	[c] : C05212 + C00001 <==> C04317 + C00060	Ether lipid metabolism	Lipid Metabolism	3.1.1.4	( Unigene53786_A0A and Unigene13551_A0A and Unigene43493_A0A and Unigene35949_A0A and Unigene29770_A0A and Unigene33536_A0A and Unigene4234_A0A and Unigene45757_A0A and Unigene18772_A0A and Unigene14829_A0A and Unigene39126_A0A and Unigene53444_A0A and Unigene17160_A0A and Unigene27877_A0A )	N	0	1000	0	2
R07388	1-(1-Alkenyl)-sn-glycero-3-phosphoethanolamine ethanolaminehydrolase	[c] : C04635 + C00001 <==> C15646 + C00189	Ether lipid metabolism	Lipid Metabolism	3.1.4.39	( Unigene6586_A0A and Unigene35482_A0A and Unigene13055_A0A )	N	0	1000	0	2
R07389	formation of 1-Radyl-2-acyl-sn-glycero-3-phosphocholine	[c] : C03201 + C00307 <==> C05212 + C00055	Ether lipid metabolism	Lipid Metabolism	2.7.8.2		N	0	1000	0	1
R07390	formation of Cardiolipin	[c] : 2 C00344 <==> C05980 + C00116	Glycerophospholipid metabolism	Lipid Metabolism	2.7.8.-	Unigene32700_A0A	N	0	1000	0	2
R07392	S-Methyl-5-thio-D-ribulose-1-phosphate hydro-lyase	[c] : C04582 <==> C15650 + C00001	Cysteine and methionine metabolism	Amino Acid Metabolism	4.2.1.109	Unigene27347_A0A	N	0	1000	0	2
R07395	5-(methylthio)-2,3-dioxopentyl-phosphate phosphohydrolase (isomerizing)	[c] : C15650 + C00001 <==> C15606 + C00009	Cysteine and methionine metabolism	Amino Acid Metabolism	3.1.3.77	( Unigene41208_A0A and Unigene44521_A0A and Unigene49663_A0A and Unigene30811_A0A and CL198.Contig1_A0A and Unigene11719_A0A and Unigene11411_A0A and Unigene30366_A0A and Unigene52322_A0A and Unigene44158_A0A and Unigene48268_A0A and Unigene20946_A0A and Unigene28173_A0A and Unigene40431_A0A and Unigene20078_A0A and Unigene2596_A0A )	N	0	1000	0	2
R07396	formation of L-Methionine	[c] : C01180 + C00025 <==> C00073 + C00026	Cysteine and methionine metabolism	Amino Acid Metabolism	2.6.1.5;2.6.1.57		N	0	1000	0	1
R07400	cephalosporin C:oxygen oxidoreductase (deaminating)	[c] : C00916 + C00001 + C00007 <==> C04712 + C00014 + C00027	Penicillin and cephalosporin biosynthesis	Biosynthesis of Other Secondary Metabolites	1.4.3.3	( Unigene6815_A0A and Unigene10145_A0A and Unigene22101_A0A )	N	0	1000	0	2
R07411	protoheme IX farnesyltransferase	[c] : C00032 + C00001 + C00448 <==> C15672 + C00013	Porphyrin and chlorophyll metabolism	Metabolism of Cofactors and Vitamins	2.5.1.-	Unigene22894_A0A	N	0	1000	0	2
R07436	p-coumaroyl-CoA:caffeoyl-CoA 3-hydroxylase	[c] : C00223 <==> C00323	Phenylalanine metabolism	Amino Acid Metabolism	1.14.13.-		N	0	1000	0	1
R07440	formation of 5-Hydroxyferulate	[c] : C01494 + C00005 + C00080 + C00007 <==> C05619 + C00006 + C00001	Phenylpropanoid biosynthesis	Biosynthesis of Other Secondary Metabolites	1.14.13.-		N	0	1000	0	1
R07443	donor:hydrogen-peroxide oxidoreductase	[c] : C12205 <==> C15807	Phenylpropanoid biosynthesis	Biosynthesis of Other Secondary Metabolites	1.11.1.7	Unigene20461_A0A	N	0	1000	0	2
R07456	D-ribulose 5-phosphate,D-glyceraldehyde 3-phosphate pyridoxal 5'-phosphate-lyase	[c] : C00118 + C00199 + C00064 <==> C00018 + C00025	Vitamin B6 metabolism	Metabolism of Cofactors and Vitamins			N	0	1000	0	1
R07460	L-cysteine:[ThiI] sulfurtransferase	[c] : C15811 + C00097 <==> C15812 + C00041	Thiamine metabolism	Metabolism of Cofactors and Vitamins	2.8.1.7	( Unigene14656_A0A and Unigene2238_A0A )	N	0	1000	0	2
R07486	delta7-avenasterol,ferrocytochrome b5:oxygen oxidoreductase 5,6-dehydrogenating	[c] : C15782 <==> C15783	Steroid biosynthesis	Lipid Metabolism	1.14.21.6	Unigene27721_A0A	N	0	1000	0	2
R07487	formation of Isofucosterol	[c] : C15783 <==> C08821	Steroid biosynthesis	Lipid Metabolism	1.3.1.21		N	0	1000	0	1
R07488	formation of Sitosterol	[c] : C08821 + C00005 + C00080 <==> C01753 + C00006	Steroid biosynthesis	Lipid Metabolism	1.3.1.72	( Unigene13969_A0A and Unigene16196_A0A and Unigene42624_A0A )	N	0	1000	0	2
R07491	episterol,ferrocytochrome b5:oxygen oxidoreductase 5,6-dehydrogenating	[c] : C15777 <==> C15780	Steroid biosynthesis	Lipid Metabolism	1.14.21.6	Unigene27721_A0A	N	0	1000	0	2
R07492	formation of 24-Methylenecholesterol	[c] : C15780 <==> C15781	Steroid biosynthesis	Lipid Metabolism	1.3.1.21		N	0	1000	0	1
R07493	formation of Campesterol	[c] : C15781 + C00005 + C00080 <==> C01789 + C00006	Steroid biosynthesis	Lipid Metabolism	1.3.1.72	( Unigene13969_A0A and Unigene16196_A0A and Unigene42624_A0A )	N	0	1000	0	2
R07498	formation of 5alpha-Cholest-8-en-3beta-ol	[c] : C05437 + C00005 + C00080 <==> C03845 + C00006	Steroid biosynthesis	Lipid Metabolism	1.3.1.72	( Unigene13969_A0A and Unigene16196_A0A and Unigene42624_A0A )	Y	-1000	1000	0	2
R07499	formation of 4,4-Dimethyl-5alpha-cholesta-8-en-3beta-ol	[c] : C05108 + C00005 + C00080 <==> C15915 + C00006	Steroid biosynthesis	Lipid Metabolism	1.3.1.72	( Unigene13969_A0A and Unigene16196_A0A and Unigene42624_A0A )	Y	-1000	1000	0	2
R07507	formation of 7-Dehydrocholesterol	[c] : C05107 + C00005 + C00080 <==> C01164 + C00006	Steroid biosynthesis	Lipid Metabolism	1.3.1.72	( Unigene13969_A0A and Unigene16196_A0A and Unigene42624_A0A )	Y	-1000	1000	0	2
R07509	14-Demethyllanosterol,ferrocytochrome-b5:oxygen oxidoreductase (hydroxylating)	[c] : C05108 + 3 C00005 + 3 C00080 + 3 C00007 <==> C15808 + 3 C00006 + 4 C00001	Steroid biosynthesis	Lipid Metabolism	1.14.13.72	( Unigene49611_A0A and Unigene7754_A0A )	N	0	1000	0	2
R07599	formation of 2-Methyl-1-hydroxypropyl-ThPP	[c] : C00141 + C00068 <==> C15976 + C00011	Valine, leucine and isoleucine degradation	Amino Acid Metabolism	1.2.4.4	( Unigene51463_A0A and Unigene52779_A0A and Unigene17634_A0A )	N	0	1000	0	2
R07600	formation of [Dihydrolipoyllysine-residue (2-methylpropanoyl)transferase] S-(2-methylpropanoyl)dihydrolipoyllysine	[c] : C15976 + C15972 <==> C15977 + C00068	Valine, leucine and isoleucine degradation	Amino Acid Metabolism	1.2.4.4	( Unigene51463_A0A and Unigene52779_A0A and Unigene17634_A0A )	N	0	1000	0	2
R07601	formation of 3-Methyl-1-hydroxybutyl-ThPP	[c] : C00233 + C00068 <==> C15974 + C00011	Valine, leucine and isoleucine degradation	Amino Acid Metabolism	1.2.4.4	( Unigene51463_A0A and Unigene52779_A0A and Unigene17634_A0A )	N	0	1000	0	2
R07602	formation of Thiamin diphosphate	[c] : C15974 + C15972 <==> C15975 + C00068	Valine, leucine and isoleucine degradation	Amino Acid Metabolism	1.2.4.4	( Unigene51463_A0A and Unigene52779_A0A and Unigene17634_A0A )	N	0	1000	0	2
R07603	formation of 2-Methyl-1-hydroxybutyl-ThPP	[c] : C00671 + C00068 <==> C15978 + C00011	Valine, leucine and isoleucine degradation	Amino Acid Metabolism	1.2.4.4	( Unigene51463_A0A and Unigene52779_A0A and Unigene17634_A0A )	N	0	1000	0	2
R07604	formation of Thiamin diphosphate	[c] : C15978 + C15972 <==> C15979 + C00068	Valine, leucine and isoleucine degradation	Amino Acid Metabolism	1.2.4.4	( Unigene51463_A0A and Unigene52779_A0A and Unigene17634_A0A )	N	0	1000	0	2
R07618	enzyme N6-(dihydrolipoyl)lysine:NAD+ oxidoreductase	[c] : C15973 + C00003 <==> C15972 + C00004 + C00080	Glycolysis / Gluconeogenesis	Carbohydrate Metabolism	1.8.1.4	( Unigene46201_A0A and Unigene52343_A0A )	Y	-1000	1000	0	2
R07628	formation of G00032	[c] : G10609 + G00031 <==> G10619 + G00032	Mucin type O-Glycan biosynthesis	Glycan Biosynthesis and Metabolism	2.4.1.-	Unigene53169_A0A	N	0	1000	0	2
R07758	formation of 3-Oxostearoyl-CoA	[c] : C00083 + C00154 <==> C16216 + C00010 + C00011	Biosynthesis of unsaturated fatty acids	Lipid Metabolism	2.3.1.-	Unigene19719_A0A	N	0	1000	0	2
R07759	formation of 3-Hydroxyoctadecanoyl-CoA	[c] : C16216 + C00005 + C00080 <==> C16217 + C00006	Biosynthesis of unsaturated fatty acids	Lipid Metabolism	1.1.1.-	( Unigene55738_A0A and Unigene42209_A0A and Unigene33351_A0A and Unigene36628_A0A and Unigene26770_A0A and Unigene21440_A0A and Unigene46607_A0A )	N	0	1000	0	2
R07760	formation of (2E)-Octadecenoyl-CoA	[c] : C16217 <==> C16218 + C00001	Biosynthesis of unsaturated fatty acids	Lipid Metabolism	4.2.1.-	( Unigene49383_A0A and Unigene4266_A0A and Unigene35416_A0A )	N	0	1000	0	2
R07761	octadecanoyl-CoA:NADP+ trans-2-oxidoreductase	[c] : C16218 + C00005 + C00080 <==> C00412 + C00006	Biosynthesis of unsaturated fatty acids	Lipid Metabolism	1.3.1.38	Unigene17934_A0A	N	0	1000	0	2
R07766	octanoyl-[acp]:protein N6-octanoyltransferase	[c] : C05752 + C16240 <==> C16236 + C00229	Lipoic acid metabolism	Metabolism of Cofactors and Vitamins	2.3.1.181	Unigene27003_A0A	N	0	1000	0	2
R07767	protein N6-(octanoyl)lysine:sulfur sulfurtransferase	[c] : C16236 + 2 C17023 + 2 C00019 <==> C16237 + 2 C00073 + 2 C05198	Lipoic acid metabolism	Metabolism of Cofactors and Vitamins	2.8.1.8	( Unigene36597_A0A and Unigene38883_A0A and Unigene15634_A0A )	N	0	1000	0	2
R07768	octanoyl-[acp]:sulfur sulfurtransferase	[c] : C05752 + 2 C17023 + 2 C00019 <==> C16239 + 2 C00073 + 2 C05198	Lipoic acid metabolism	Metabolism of Cofactors and Vitamins	2.8.1.8	( Unigene36597_A0A and Unigene38883_A0A and Unigene15634_A0A )	N	0	1000	0	2
R07769	lipoyl-[acp]:protein N6-lipoyltransferase	[c] : C16239 + C16240 <==> C16237 + C00229	Lipoic acid metabolism	Metabolism of Cofactors and Vitamins	2.3.1.181	Unigene27003_A0A	N	0	1000	0	2
R07807	formation of G06780	[c] : G13032 + C00001 <==> G06780 + C00124	Glycosaminoglycan degradation	Glycan Biosynthesis and Metabolism	3.2.1.23	( Unigene34401_A0A and Unigene52557_A0A and Unigene42262_A0A ) or ( Unigene32446_A0A and Unigene3372_A0A )	N	0	1000	0	2
R07808	N-acetyl-D-glucosamine-6-sulfate 6-sulfohydrolase	[c] : G06780 + C00001 <==> G13033 + C00059	Glycosaminoglycan degradation	Glycan Biosynthesis and Metabolism	3.1.6.14	( Unigene17928_A0A and Unigene24334_A0A ) or ( Unigene52544_A0A )	N	0	1000	0	2
R07809	formation of G08421	[c] : G13033 + C00001 <==> G08421 + C01132	Glycosaminoglycan degradation	Glycan Biosynthesis and Metabolism	3.2.1.52	( Unigene13631_A0A and Unigene40536_A0A and Unigene10471_A0A and Unigene41443_A0A and Unigene15984_A0A and Unigene9242_A0A ) or ( Unigene17581_A0A and Unigene42036_A0A and Unigene29282_A0A )	N	0	1000	0	2
R07818	formation of G09660	[c] : G13040 + C00001 <==> G09660 + C00191	Glycosaminoglycan degradation	Glycan Biosynthesis and Metabolism	3.2.1.31	( Unigene385_A0A and Unigene53592_A0A ) or ( Unigene53593_A0A )	N	0	1000	0	2
R07819	N-acetyl-D-glucosamine-6-sulfate 6-sulfohydrolase	[c] : G09660 + C00001 <==> G02632 + C00059	Glycosaminoglycan degradation	Glycan Biosynthesis and Metabolism	3.1.6.14	( Unigene17928_A0A and Unigene24334_A0A ) or ( Unigene52544_A0A )	N	0	1000	0	2
R07823	N-acetyl-D-galactosamine-4-sulfate 4-sulfohydrolase	[c] : G12336 + C00001 <==> G13043 + C00059	Glycosaminoglycan degradation	Glycan Biosynthesis and Metabolism	3.1.6.12	( Unigene16176_A0A and Unigene30745_A0A and Unigene7190_A0A and Unigene15595_A0A ) or ( Unigene4748_A0A )	N	0	1000	0	2
R07826	p-coumarate 3-hydroxylase	[c] : C00811 <==> C01197	Phenylpropanoid biosynthesis	Biosynthesis of Other Secondary Metabolites	1.14.13.-		N	0	1000	0	1
R07859	formation of (9Z,12Z,15Z)-Octadecatrienoic acid	[c] : C00157 + C00001 <==> C04230 + C06427	alpha-Linolenic acid metabolism	Lipid Metabolism	3.1.1.4	( Unigene53786_A0A and Unigene13551_A0A and Unigene43493_A0A and Unigene35949_A0A and Unigene29770_A0A and Unigene33536_A0A and Unigene4234_A0A and Unigene45757_A0A and Unigene18772_A0A and Unigene14829_A0A and Unigene39126_A0A and Unigene53444_A0A and Unigene17160_A0A and Unigene27877_A0A )	N	0	1000	0	2
R07861	formation of Stearidonic acid	[c] : C06427 + C00030 + C00007 <==> C16300 + C00028 + 2 C00001	alpha-Linolenic acid metabolism	Lipid Metabolism	1.14.19.-	Unigene49601_A0A	N	0	1000	0	2
R07888	formation of trans-2-Enoyl-OPC8-CoA	[c] : C16327 + C00016 <==> C16328 + C01352	alpha-Linolenic acid metabolism	Lipid Metabolism	1.3.3.6	( Unigene16412_A0A and Unigene41487_A0A and Unigene37402_A0A and Unigene52196_A0A and Unigene46557_A0A and Unigene32260_A0A and Unigene22825_A0A and Unigene37932_A0A and Unigene56956_A0A )	N	0	1000	0	2
R07892	formation of trans-2-Enoyl-OPC6-CoA	[c] : C16331 + C00016 <==> C16332 + C01352	alpha-Linolenic acid metabolism	Lipid Metabolism	1.3.3.6	( Unigene16412_A0A and Unigene41487_A0A and Unigene37402_A0A and Unigene52196_A0A and Unigene46557_A0A and Unigene32260_A0A and Unigene22825_A0A and Unigene37932_A0A and Unigene56956_A0A )	N	0	1000	0	2
R07896	formation of trans-2-Enoyl-OPC4-CoA	[c] : C16335 + C00016 <==> C16336 + C01352	alpha-Linolenic acid metabolism	Lipid Metabolism	1.3.3.6	( Unigene16412_A0A and Unigene41487_A0A and Unigene37402_A0A and Unigene52196_A0A and Unigene46557_A0A and Unigene32260_A0A and Unigene22825_A0A and Unigene37932_A0A and Unigene56956_A0A )	N	0	1000	0	2
R07922	formation of 1,7-Dimethylxanthine	[c] : C00019 + C16353 <==> C00021 + C13747	Caffeine metabolism	Biosynthesis of Other Secondary Metabolites			N	0	1000	0	1
R07933	alpha-linolenoyl-CoA,ferrocytochrome b5:oxygen oxidoreductase (6,7 cis-dehydrogenating)	[c] : C16162 + 2 C00999 + C00007 + 2 C00080 <==> C16163 + 2 C00996 + 2 C00001	Biosynthesis of unsaturated fatty acids	Lipid Metabolism			N	0	1000	0	2
R07934	formation of (2E,6Z,9Z,12Z,15Z,18Z,21Z)-Tetracosahepta-2,6,9,12,15,18,21-enoyl-CoA	[c] : C16168 + C00016 <==> C16374 + C01352	Biosynthesis of unsaturated fatty acids	Lipid Metabolism	1.3.3.6	( Unigene16412_A0A and Unigene41487_A0A and Unigene37402_A0A and Unigene52196_A0A and Unigene46557_A0A and Unigene32260_A0A and Unigene22825_A0A and Unigene37932_A0A and Unigene56956_A0A )	N	0	1000	0	2
R07935	formation of (6Z,9Z,12Z,15Z,18Z,21Z)-3-Hydroxytetracosahexa-6,9,12,15,18,21-enoyl-CoA	[c] : C16375 <==> C16374 + C00001	Biosynthesis of unsaturated fatty acids	Lipid Metabolism	4.2.1.-		N	0	1000	0	1
R07936	formation of (6Z,9Z,12Z,15Z,18Z,21Z)-3-Oxotetracosahexa-6,9,12,15,18,21-enoyl-CoA	[c] : C16375 + C00003 <==> C16376 + C00004 + C00080	Biosynthesis of unsaturated fatty acids	Lipid Metabolism	1.1.1.211	( Unigene44656_A0A and Unigene25565_A0A and Unigene14392_A0A and Unigene55152_A0A and Unigene11708_A0A and Unigene29182_A0A )	N	0	1000	0	2
R07937	formation of (4Z,7Z,10Z,13Z,16Z,19Z)-Docosahexaenoyl-CoA	[c] : C16169 + C00024 <==> C00010 + C16376	Biosynthesis of unsaturated fatty acids	Lipid Metabolism	2.3.1.16		N	0	1000	0	1
R07942	1-methylxanthine:oxygen oxidoreductase	[c] : C16358 + C00001 + C00007 <==> C16359 + C00027	Caffeine metabolism	Biosynthesis of Other Secondary Metabolites	1.17.3.2	( Unigene45635_A0A and Unigene51485_A0A and Unigene26268_A0A and Unigene16943_A0A and Unigene52799_A0A and Unigene42362_A0A and Unigene30135_A0A )	N	0	1000	0	2
R07943	formation of 1-Methylxanthine	[c] : C13747 <==> C16358	Caffeine metabolism	Biosynthesis of Other Secondary Metabolites	1.14.14.1		N	0	1000	0	1
R07945	formation of 1,7-Dimethyluric acid	[c] : C13747 <==> C16356	Caffeine metabolism	Biosynthesis of Other Secondary Metabolites	1.14.14.1	Unigene53088_A0A	N	0	1000	0	2
R07950	formation of (2E,6Z,9Z,12Z,15Z,18Z)-Tetracosahexa-2,6,9,12,15,18-enoyl-CoA	[c] : C16172 + C00016 <==> C16387 + C01352	Biosynthesis of unsaturated fatty acids	Lipid Metabolism	1.3.3.6	( Unigene16412_A0A and Unigene41487_A0A and Unigene37402_A0A and Unigene52196_A0A and Unigene46557_A0A and Unigene32260_A0A and Unigene22825_A0A and Unigene37932_A0A and Unigene56956_A0A )	N	0	1000	0	2
R07951	formation of (6Z,9Z,12Z,15Z,18Z)-3-Hydroxytetracosapenta-6,9,12,15,18-enoyl-CoA	[c] : C16388 <==> C16387 + C00001	Biosynthesis of unsaturated fatty acids	Lipid Metabolism	4.2.1.-		N	0	1000	0	1
R07952	formation of (6Z,9Z,12Z,15Z,18Z)-3-Oxotetracosapenta-6,9,12,15,18-enoyl-CoA	[c] : C16388 + C00003 <==> C16389 + C00004 + C00080	Biosynthesis of unsaturated fatty acids	Lipid Metabolism	1.1.1.211	( Unigene44656_A0A and Unigene25565_A0A and Unigene14392_A0A and Unigene55152_A0A and Unigene11708_A0A and Unigene29182_A0A )	N	0	1000	0	2
R07957	paraxanthine:oxygen oxidoreductase (N1-demethylating)	[c] : C13747 + C00004 + C00080 + C00007 <==> C16353 + C00003 + C00067 + C00001	Caffeine metabolism	Biosynthesis of Other Secondary Metabolites	1.13.12.-		N	0	1000	0	1
R07958	paraxanthine:oxygen oxidoreductase (N1-demethylating)	[c] : C13747 + C00005 + C00080 + C00007 <==> C16353 + C00006 + C00067 + C00001	Caffeine metabolism	Biosynthesis of Other Secondary Metabolites	1.13.12.-		N	0	1000	0	1
R07959	formation of 1-Methylxanthine	[c] : C13747 + C00004 + C00080 + C00007 <==> C16358 + C00003 + C00067 + C00001	Caffeine metabolism	Biosynthesis of Other Secondary Metabolites	1.13.12.-		N	0	1000	0	1
R07960	formation of 1-Methylxanthine	[c] : C13747 + C00005 + C00080 + C00007 <==> C16358 + C00006 + C00067 + C00001	Caffeine metabolism	Biosynthesis of Other Secondary Metabolites	1.13.12.-		N	0	1000	0	1
R07961	theobromine:oxygen oxidoreductase (N3-demethylating)	[c] : C07480 + C00004 + C00080 + C00007 <==> C16353 + C00003 + C00067 + C00001	Caffeine metabolism	Biosynthesis of Other Secondary Metabolites	1.13.12.-		N	0	1000	0	1
R07962	theobromine:oxygen oxidoreductase (N3-demethylating)	[c] : C07480 + C00005 + C00080 + C00007 <==> C16353 + C00006 + C00067 + C00001	Caffeine metabolism	Biosynthesis of Other Secondary Metabolites	1.13.12.-		N	0	1000	0	1
R07965	7-methylxanthine:oxygen oxidoreductase (demethylating)	[c] : C16353 + C00004 + C00080 + C00007 <==> C00385 + C00003 + C00067 + C00001	Caffeine metabolism	Biosynthesis of Other Secondary Metabolites	1.13.12.-		N	0	1000	0	1
R07966	7-methylxanthine:oxygen oxidoreductase (demethylating)	[c] : C16353 + C00005 + C00080 + C00007 <==> C00385 + C00006 + C00067 + C00001	Caffeine metabolism	Biosynthesis of Other Secondary Metabolites	1.13.12.-		N	0	1000	0	1
R07969	1-methylxanthine:oxygen oxidoreductase (N1-demethylating)	[c] : C16358 + C00004 + C00080 + C00007 <==> C00385 + C00003 + C00067 + C00001	Caffeine metabolism	Biosynthesis of Other Secondary Metabolites	1.13.12.-		N	0	1000	0	1
R07970	1-methylxanthine:oxygen oxidoreductase (N1-demethylating)	[c] : C16358 + C00005 + C00080 + C00007 <==> C00385 + C00006 + C00067 + C00001	Caffeine metabolism	Biosynthesis of Other Secondary Metabolites	1.13.12.-		N	0	1000	0	1
R07977	1,7-dimethylxanthine:oxygen oxidoreductase	[c] : C13747 + C00007 + C00001 <==> C16356 + C00027	Caffeine metabolism	Biosynthesis of Other Secondary Metabolites	1.17.3.2	( Unigene45635_A0A and Unigene51485_A0A and Unigene26268_A0A and Unigene16943_A0A and Unigene52799_A0A and Unigene42362_A0A and Unigene30135_A0A )	N	0	1000	0	2
R07978	3,7-dimethylxanthine:oxygen oxidoreductase	[c] : C07480 + C00001 + C00007 <==> C16360 + C00027	Caffeine metabolism	Biosynthesis of Other Secondary Metabolites	1.17.3.2	( Unigene45635_A0A and Unigene51485_A0A and Unigene26268_A0A and Unigene16943_A0A and Unigene52799_A0A and Unigene42362_A0A and Unigene30135_A0A )	N	0	1000	0	2
R07979	7-methylxanthine:oxygen oxidoreductase	[c] : C16353 + C00007 + C00001 <==> C16355 + C00027	Caffeine metabolism	Biosynthesis of Other Secondary Metabolites	1.17.3.2	( Unigene45635_A0A and Unigene51485_A0A and Unigene26268_A0A and Unigene16943_A0A and Unigene52799_A0A and Unigene42362_A0A and Unigene30135_A0A )	N	0	1000	0	2
R07981	formation of 3,6,8-Trimethylallantoin	[c] : C16361 + C00007 + 2 C00001 <==> C16362 + C00011 + C00027	Caffeine metabolism	Biosynthesis of Other Secondary Metabolites	1.7.3.3	Unigene27799_A0A	N	0	1000	0	2
R08089	formation of Geranoyl-CoA	[c] : C16464 + C00028 <==> C01920 + C00030	Geraniol degradation	Metabolism of Terpenoids and Polyketides	1.3.99.-	Unigene16000_A0A	N	0	1000	0	2
R08093	3-hydroxy-5-methylhex-4-enoyl-CoA hydro-lyase	[c] : C16468 + C00001 <==> C16469	Geraniol degradation	Metabolism of Terpenoids and Polyketides	4.2.1.17	Unigene31479_A0A	N	0	1000	0	2
R08094	3-hydroxy-5-methylhex-4-enoyl-CoA:NAD+ oxidoreductase	[c] : C16469 + C00003 <==> C16471 + C00004 + C00080	Geraniol degradation	Metabolism of Terpenoids and Polyketides	1.1.1.35	Unigene8033_A0A	N	0	1000	0	2
R08095	3-methylcrotonyl-CoA:acetyl-CoA C-acyltransferase	[c] : C16471 + C00010 <==> C03069 + C00024	Geraniol degradation	Metabolism of Terpenoids and Polyketides	2.3.1.16		N	0	1000	0	1
R08127	beta-D-glucuronoside glucuronosohydrolase	[c] : C04900 + C00001 <==> C12632 + C00191	Flavone and flavonol biosynthesis	Biosynthesis of Other Secondary Metabolites	3.2.1.31	( Unigene385_A0A and Unigene53592_A0A ) or ( Unigene53593_A0A )	N	0	1000	0	2
R08132	formation of 14alpha-Hydroxy-5beta-cholest-7-ene-3,6-dione	[c] : C01164 <==> C16509	Insect hormone biosynthesis	Metabolism of Terpenoids and Polyketides		Unigene19254_A0A	N	0	1000	0	2
R08134	formation of 2-Deoxyecdysone	[c] : C16494 <==> C16495	Insect hormone biosynthesis	Metabolism of Terpenoids and Polyketides		( Unigene1867_A0A and Unigene797_A0A and Unigene6855_A0A and Unigene1609_A0A )	N	0	1000	0	2
R08135	formation of Ecdysone	[c] : C16495 <==> C00477	Insect hormone biosynthesis	Metabolism of Terpenoids and Polyketides		( Unigene45919_A0A and Unigene47941_A0A and Unigene45215_A0A )	N	0	1000	0	2
R08136	formation of 2,22-Dideoxy-3-dehydroecdysone	[c] : C16509 <==> C16498	Insect hormone biosynthesis	Metabolism of Terpenoids and Polyketides			N	0	1000	0	1
R08138	formation of 3-Dehydro-2-deoxyecdysone	[c] : C16498 <==> C16497	Insect hormone biosynthesis	Metabolism of Terpenoids and Polyketides		( Unigene1867_A0A and Unigene797_A0A and Unigene6855_A0A and Unigene1609_A0A )	N	0	1000	0	2
R08139	formation of 3-Dehydroecdysone	[c] : C16497 <==> C02513	Insect hormone biosynthesis	Metabolism of Terpenoids and Polyketides		( Unigene45919_A0A and Unigene47941_A0A and Unigene45215_A0A )	N	0	1000	0	2
R08141	formation of Ecdysone	[c] : C02513 + C00004 + C00080 <==> C00477 + C00003	Insect hormone biosynthesis	Metabolism of Terpenoids and Polyketides			N	0	1000	0	1
R08143	formation of 20,26-Dihydroxyecdysone	[c] : C02633 <==> C16500	Insect hormone biosynthesis	Metabolism of Terpenoids and Polyketides	1.14.-.-	( Unigene56756_A0A ) or ( Unigene43369_A0A and Unigene41799_A0A and Unigene14798_A0A )	N	0	1000	0	2
R08149	juvenile hormone III acylhydrolase	[c] : C09694 + C00001 <==> C16504 + C00132	Insect hormone biosynthesis	Metabolism of Terpenoids and Polyketides	3.1.1.59	( Unigene7966_A0A and Unigene16186_A0A and Unigene7968_A0A and Unigene44616_A0A and Unigene1571_A0A and Unigene1048_A0A ) or ( Unigene7053_A0A and Unigene35593_A0A and Unigene5583_A0A and Unigene7967_A0A and Unigene23673_A0A )	N	0	1000	0	2
R08150	formation of (10S)-Juvenile hormone III acid diol	[c] : C16505 + C00001 <==> C16506 + C00132	Insect hormone biosynthesis	Metabolism of Terpenoids and Polyketides	3.1.1.59	( Unigene7966_A0A and Unigene16186_A0A and Unigene7968_A0A and Unigene44616_A0A and Unigene1571_A0A and Unigene1048_A0A ) or ( Unigene7053_A0A and Unigene35593_A0A and Unigene5583_A0A and Unigene7967_A0A and Unigene23673_A0A )	N	0	1000	0	2
R08152	formation of (10S)-Juvenile hormone III acid diol	[c] : C16504 + C00001 <==> C16506	Insect hormone biosynthesis	Metabolism of Terpenoids and Polyketides			N	0	1000	0	1
R08153	formation of (10S)-Juvenile hormone III diol	[c] : C09694 + C00001 <==> C16505	Insect hormone biosynthesis	Metabolism of Terpenoids and Polyketides			N	0	1000	0	1
R08159	tetradecanoyl-[acyl-carrier protein] hydrolase	[c] : C05761 + C00001 <==> C00229 + C06424	Fatty acid biosynthesis	Lipid Metabolism			N	0	1000	0	2
R08162	hexadecenoyl-[acyl-carrier protein] hydrolase	[c] : C16520 + C00001 <==> C00229 + C08362	Fatty acid biosynthesis	Lipid Metabolism			N	0	1000	0	2
R08174	Stearoyl-CoA hydrolase	[c] : C00412 + C00001 <==> C00010 + C01530	Biosynthesis of unsaturated fatty acids	Lipid Metabolism	3.1.2.2	( Unigene11739_A0A ) or ( Unigene33552_A0A )	N	0	1000	0	2
R08175	Icosanoyl-CoA hydrolase	[c] : C02041 + C00001 <==> C00010 + C06425	Biosynthesis of unsaturated fatty acids	Lipid Metabolism	3.1.2.2	( Unigene11739_A0A ) or ( Unigene33552_A0A )	N	0	1000	0	2
R08176	Oleoyl-CoA hydrolase	[c] : C00510 + C00001 <==> C00010 + C00712	Biosynthesis of unsaturated fatty acids	Lipid Metabolism	3.1.2.2	( Unigene11739_A0A ) or ( Unigene33552_A0A )	N	0	1000	0	2
R08177	Linoleoyl-CoA hydrolase	[c] : C02050 + C00001 <==> C00010 + C01595	Biosynthesis of unsaturated fatty acids	Lipid Metabolism	3.1.2.2	( Unigene11739_A0A ) or ( Unigene33552_A0A )	N	0	1000	0	2
R08178	formation of (9Z,12Z,15Z)-Octadecatrienoic acid	[c] : C16162 + C00001 <==> C00010 + C06427	Biosynthesis of unsaturated fatty acids	Lipid Metabolism			N	0	1000	0	2
R08179	formation of (5Z,8Z,11Z,14Z,17Z)-Icosapentaenoic acid	[c] : C16165 + C00001 <==> C00010 + C06428	Biosynthesis of unsaturated fatty acids	Lipid Metabolism	3.1.2.2	( Unigene11739_A0A ) or ( Unigene33552_A0A )	N	0	1000	0	2
R08180	formation of (4Z,7Z,10Z,13Z,16Z,19Z)-Docosahexaenoic acid	[c] : C16169 + C00001 <==> C00010 + C06429	Biosynthesis of unsaturated fatty acids	Lipid Metabolism	3.1.2.2	( Unigene11739_A0A ) or ( Unigene33552_A0A )	N	0	1000	0	2
R08181	formation of (6Z,9Z,12Z)-Octadecatrienoic acid	[c] : C03035 + C00001 <==> C00010 + C06426	Biosynthesis of unsaturated fatty acids	Lipid Metabolism	3.1.2.2	( Unigene11739_A0A ) or ( Unigene33552_A0A )	N	0	1000	0	2
R08182	formation of (8Z,11Z,14Z)-Icosatrienoic acid	[c] : C03595 + C00001 <==> C00010 + C03242	Biosynthesis of unsaturated fatty acids	Lipid Metabolism	3.1.2.2	( Unigene11739_A0A ) or ( Unigene33552_A0A )	N	0	1000	0	2
R08183	formation of (5Z,8Z,11Z,14Z)-Icosatetraenoic acid	[c] : C02249 + C00001 <==> C00010 + C00219	Biosynthesis of unsaturated fatty acids	Lipid Metabolism	3.1.2.2	( Unigene11739_A0A ) or ( Unigene33552_A0A )	N	0	1000	0	2
R08184	formation of Docosanoic acid	[c] : C16528 + C00001 <==> C00010 + C08281	Biosynthesis of unsaturated fatty acids	Lipid Metabolism			N	0	1000	0	2
R08185	formation of Tetracosanoic acid	[c] : C16529 + C00001 <==> C00010 + C08320	Biosynthesis of unsaturated fatty acids	Lipid Metabolism			N	0	1000	0	2
R08186	formation of Icosenoic acid	[c] : C16530 + C00001 <==> C00010 + C16526	Biosynthesis of unsaturated fatty acids	Lipid Metabolism			N	0	1000	0	2
R08187	formation of Erucic acid	[c] : C16531 + C00001 <==> C00010 + C08316	Biosynthesis of unsaturated fatty acids	Lipid Metabolism			N	0	1000	0	2
R08188	formation of (15Z)-Tetracosenoic acid	[c] : C16532 + C00001 <==> C00010 + C08323	Biosynthesis of unsaturated fatty acids	Lipid Metabolism			N	0	1000	0	2
R08190	formation of Icosadienoic acid	[c] : C16180 + C00001 <==> C00010 + C16525	Biosynthesis of unsaturated fatty acids	Lipid Metabolism			N	0	1000	0	2
R08192	formation of Icosatrienoic acid	[c] : C16179 + C00001 <==> C00010 + C16522	Biosynthesis of unsaturated fatty acids	Lipid Metabolism			N	0	1000	0	2
R08193	N-Acetyl-D-glucosamine 1-phosphate 1,6-phosphomutase	[c] : C00357 <==> C04501	Amino sugar and nucleotide sugar metabolism	Carbohydrate Metabolism	5.4.2.3	( Unigene43809_A0A and Unigene39238_A0A )	Y	-1000	1000	0	2
R08218	L-serine:tRNASec ligase (AMP-forming)	[c] : C00002 + C00065 + C16636 <==> C00020 + C00013 + C06481	Aminoacyl-tRNA biosynthesis	Translation	6.1.1.11	( Unigene53874_A0A and Unigene28835_A0A and Unigene55283_A0A and Unigene38112_A0A and Unigene15349_A0A and Unigene3385_A0A )	N	0	1000	0	2
R08220	capecitabine hydrolase	[c] : C12650 + C00001 <==> C16635 + C16834 + C00011	Drug metabolism - other enzymes	Xenobiotics Biodegradation and Metabolism	3.1.1.1	( Unigene7966_A0A and Unigene16186_A0A and Unigene15728_A0A and Unigene44616_A0A and Unigene1048_A0A ) or ( Unigene7053_A0A and Unigene35593_A0A and Unigene5583_A0A and Unigene54036_A0A )	N	0	1000	0	2
R08221	5'-deoxy-5-fluorocytidine aminohydrolase	[c] : C16635 + C00001 <==> C12739 + C00014	Drug metabolism - other enzymes	Xenobiotics Biodegradation and Metabolism	3.5.4.5		N	0	1000	0	1
R08222	5'-deoxy-5-fluorouridine:phosphate deoxy-alpha-D-ribosyltransferase	[c] : C12739 + C00009 <==> C07649 + C16637	Drug metabolism - other enzymes	Xenobiotics Biodegradation and Metabolism	2.4.2.4	( Unigene19170_A0A ) or ( Unigene30369_A0A )	N	0	1000	0	2
R08223	L-seryl-tRNA(Sec) kinase	[c] : C06481 + C00002 <==> C16638 + C00008	Selenocompound metabolism	Metabolism of Other Amino Acids	2.7.1.164	Unigene4445_A0A	N	0	1000	0	2
R08224	selenophosphate:O-phospho-L-seryl-tRNA(Sec) selenium transferase	[c] : C16638 + C05172 + C00001 <==> C06482 + 2 C00009	Selenocompound metabolism	Metabolism of Other Amino Acids	2.9.1.2	( Unigene50258_A0A and Unigene54918_A0A )	N	0	1000	0	2
R08225	formation of 5-FU	[c] : C12673 + C03024 + C00007 <==> C07649 + C16835 + C03161 + C00001	Drug metabolism - other enzymes	Xenobiotics Biodegradation and Metabolism	1.14.14.1	Unigene53088_A0A	N	0	1000	0	2
R08226	5,6-dihydro-5-fluorouracil:NADP+ 5-oxidoreductase	[c] : C07649 + C00005 + C00080 <==> C16630 + C00006	Drug metabolism - other enzymes	Xenobiotics Biodegradation and Metabolism	1.3.1.2	( Unigene45570_A0A and Unigene26090_A0A and Unigene24970_A0A and Unigene9974_A0A and Unigene25528_A0A and Unigene18740_A0A and Unigene16757_A0A and Unigene32515_A0A )	N	0	1000	0	2
R08227	5,6-dihydro-5-fluorouracil amidohydrolase	[c] : C16630 + C00001 <==> C16631	Drug metabolism - other enzymes	Xenobiotics Biodegradation and Metabolism	3.5.2.2	( Unigene49762_A0A and Unigene22851_A0A )	N	0	1000	0	2
R08228	alpha-fluoro-beta-ureidopropionic acid amidohydrolase	[c] : C16631 + C00001 <==> C16632 + C00011 + C00014	Drug metabolism - other enzymes	Xenobiotics Biodegradation and Metabolism	3.5.1.6	Unigene40319_A0A	N	0	1000	0	2
R08229	5-fluorouridine:phosphate alpha-D-ribosyltransferase	[c] : C07649 + C00620 <==> C16633 + C00009	Drug metabolism - other enzymes	Xenobiotics Biodegradation and Metabolism	2.4.2.3		N	0	1000	0	1
R08230	5-fluorodeoxyuridine:phosphate deoxy-alpha-D-ribosyltransferase	[c] : C07649 + C00672 <==> C11736 + C00009	Drug metabolism - other enzymes	Xenobiotics Biodegradation and Metabolism	2.4.2.4	( Unigene19170_A0A ) or ( Unigene30369_A0A )	N	0	1000	0	2
R08231	5-fluorouridine monophosphate:diphosphate phospho-alpha-D-ribosyl-transferase	[c] : C07649 + C00119 <==> C16634 + C00013	Drug metabolism - other enzymes	Xenobiotics Biodegradation and Metabolism	2.4.2.10		N	0	1000	0	1
R08232	ATP:5-fluorouridine 5'-phosphotransferase	[c] : C16633 + C00002 <==> C16634 + C00008	Drug metabolism - other enzymes	Xenobiotics Biodegradation and Metabolism	2.7.1.48	( Unigene1991_A0A and Unigene26015_A0A and Unigene11982_A0A )	N	0	1000	0	2
R08233	ATP:5-fluorodeoxyuridine 5'-phosphotransferase	[c] : C11736 + C00002 <==> C04242 + C00008	Drug metabolism - other enzymes	Xenobiotics Biodegradation and Metabolism	2.7.1.21	( Unigene35626_A0A and Unigene33186_A0A )	N	0	1000	0	2
R08235	6-mercaptopurin:oxygen oxidoreductase	[c] : C02380 + 2 C00001 + 2 C00007 <==> C16613 + 2 C00027	Drug metabolism - other enzymes	Xenobiotics Biodegradation and Metabolism	1.17.3.2	( Unigene45635_A0A and Unigene51485_A0A and Unigene26268_A0A and Unigene16943_A0A and Unigene52799_A0A and Unigene42362_A0A and Unigene30135_A0A )	N	0	1000	0	2
R08236	S-adenosyl-L-methionine:6-mercaptopurin S-methyltransferase	[c] : C02380 + C00019 <==> C16614 + C00021	Drug metabolism - other enzymes	Xenobiotics Biodegradation and Metabolism	2.1.1.67	Unigene55796_A0A	N	0	1000	0	2
R08237	6-thioinosine 5'-monophosphate:diphosphate phospho-D-ribosyltransferase	[c] : C02380 + C00119 <==> C04646 + C00013	Drug metabolism - other enzymes	Xenobiotics Biodegradation and Metabolism	2.4.2.8	Unigene5009_A0A	N	0	1000	0	2
R08238	6-methylthiopurine 5'-monophosphate ribonucleotide:diphosphate phospho-D-ribosyltransferase	[c] : C16614 + C00119 <==> C16615 + C00013	Drug metabolism - other enzymes	Xenobiotics Biodegradation and Metabolism	2.4.2.8	Unigene5009_A0A	N	0	1000	0	2
R08239	S-adenosyl-L-methionine:6-thioinosine 5'-monophosphate S-methyltransferase	[c] : C04646 + C00019 <==> C16615 + C00021	Drug metabolism - other enzymes	Xenobiotics Biodegradation and Metabolism	2.1.1.67	Unigene55796_A0A	N	0	1000	0	2
R08240	6-thioinosine 5'-monophosphate:NAD+ oxidoreductase	[c] : C04646 + C00003 + C00001 <==> C16618 + C00004 + C00080	Drug metabolism - other enzymes	Xenobiotics Biodegradation and Metabolism	1.1.1.205	( Unigene53415_A0A and Unigene10298_A0A and Unigene32069_A0A )	N	0	1000	0	2
R08244	6-thioxanthine 5'-monophosphate:L-glutamine amido-ligase (AMP-forming)	[c] : C16618 + C00002 + C00064 + C00001 <==> C16619 + C00020 + C00013 + C00025	Drug metabolism - other enzymes	Xenobiotics Biodegradation and Metabolism	6.3.5.2	( Unigene14539_A0A and Unigene12067_A0A and Unigene231_A0A )	N	0	1000	0	2
R08245	6-thioguanosine monophosphate:diphosphate phospho-D-ribosyltransferase	[c] : C07648 + C00119 <==> C16619 + C00013	Drug metabolism - other enzymes	Xenobiotics Biodegradation and Metabolism	2.4.2.8	Unigene5009_A0A	N	0	1000	0	2
R08246	S-adenosyl-L-methionine:6-thioguanosine monophosphate S-methyltransferase	[c] : C16619 + C00019 <==> C16620 + C00021	Drug metabolism - other enzymes	Xenobiotics Biodegradation and Metabolism	2.1.1.67	Unigene55796_A0A	N	0	1000	0	2
R08255	formation of SN-38	[c] : C16641 + C00001 <==> C11173 + C16836	Drug metabolism - other enzymes	Xenobiotics Biodegradation and Metabolism	3.1.1.1	( Unigene7966_A0A and Unigene16186_A0A and Unigene15728_A0A and Unigene44616_A0A and Unigene1048_A0A ) or ( Unigene7053_A0A and Unigene35593_A0A and Unigene5583_A0A and Unigene54036_A0A )	N	0	1000	0	2
R08256	formation of APC	[c] : C16641 <==> C16542	Drug metabolism - other enzymes	Xenobiotics Biodegradation and Metabolism	1.14.14.1	( CL367.Contig1_A0A and CL1618.Contig1_A0A and Unigene37775_A0A and Unigene28120_A0A and Unigene48800_A0A and Unigene20529_A0A and Unigene25620_A0A ) or ( Unigene20555_A0A )	N	0	1000	0	2
R08257	formation of NPC	[c] : C16641 + 2 C03024 + 2 C00007 <==> C16543 + C12518 + 2 C03161 + 2 C00001	Drug metabolism - other enzymes	Xenobiotics Biodegradation and Metabolism	1.14.14.1	( CL367.Contig1_A0A and CL1618.Contig1_A0A and Unigene37775_A0A and Unigene28120_A0A and Unigene48800_A0A and Unigene20529_A0A and Unigene25620_A0A ) or ( Unigene20555_A0A )	N	0	1000	0	2
R08258	formation of SN-38	[c] : C16543 + C00001 <==> C11173 + C16837	Drug metabolism - other enzymes	Xenobiotics Biodegradation and Metabolism	3.1.1.1	( Unigene7966_A0A and Unigene44616_A0A and Unigene1048_A0A ) or ( Unigene35593_A0A and Unigene5583_A0A )	N	0	1000	0	2
R08259	formation of SN38 glucuronide	[c] : C11173 + C00167 <==> C11376 + C00015	Drug metabolism - other enzymes	Xenobiotics Biodegradation and Metabolism	2.4.1.17	( Unigene49795_A0A ) or ( Unigene49794_A0A and Unigene48897_A0A and Unigene14677_A0A and Unigene27751_A0A and Unigene44191_A0A and Unigene32852_A0A )	N	0	1000	0	2
R08260	SN38 glucuronide glucuronosohydrolase	[c] : C11376 + C00001 <==> C11173 + C00191	Drug metabolism - other enzymes	Xenobiotics Biodegradation and Metabolism	3.2.1.31	( Unigene385_A0A and Unigene53592_A0A ) or ( Unigene53593_A0A )	N	0	1000	0	2
R08261	formation of Codeine-6-glucuronide	[c] : C00167 + C06174 <==> C00015 + C16577	Drug metabolism - cytochrome P450	Xenobiotics Biodegradation and Metabolism	2.4.1.17	( Unigene49795_A0A ) or ( Unigene49794_A0A and Unigene48897_A0A and Unigene14677_A0A and Unigene27751_A0A and Unigene44191_A0A and Unigene32852_A0A )	N	0	1000	0	2
R08262	formation of Morphine-3-glucuronide	[c] : C01516 + C00167 <==> C16643 + C00015	Drug metabolism - cytochrome P450	Xenobiotics Biodegradation and Metabolism	2.4.1.17	( Unigene49795_A0A ) or ( Unigene49794_A0A and Unigene48897_A0A and Unigene14677_A0A and Unigene27751_A0A and Unigene44191_A0A and Unigene32852_A0A )	N	0	1000	0	2
R08263	formation of Morphine-6-glucuronide	[c] : C01516 + C00167 <==> C16578 + C00015	Drug metabolism - cytochrome P450	Xenobiotics Biodegradation and Metabolism	2.4.1.17	( Unigene49795_A0A ) or ( Unigene49794_A0A and Unigene48897_A0A and Unigene14677_A0A and Unigene27751_A0A and Unigene44191_A0A and Unigene32852_A0A )	N	0	1000	0	2
R08264	formation of Norcodeine	[c] : C06174 + C03024 + C00007 <==> C16576 + C00067 + C03161 + C00001	Drug metabolism - cytochrome P450	Xenobiotics Biodegradation and Metabolism	1.14.14.1	( CL367.Contig1_A0A and CL1618.Contig1_A0A and Unigene37775_A0A and Unigene28120_A0A and Unigene48800_A0A and Unigene20529_A0A and Unigene25620_A0A ) or ( Unigene20555_A0A )	N	0	1000	0	2
R08266	tamoxifen,NADPH:oxygen oxidoreductase (N-oxide-forming)	[c] : C07108 + C00007 + C00005 + C00080 <==> C16545 + C00006 + C00001	Drug metabolism - cytochrome P450	Xenobiotics Biodegradation and Metabolism	1.14.13.8	Unigene41337_A0A	N	0	1000	0	2
R08267	formation of Hydroxytamoxifen	[c] : C07108 + C00005 + C00007 + C00080 <==> C05011 + C00006 + C00001	Drug metabolism - cytochrome P450	Xenobiotics Biodegradation and Metabolism	1.14.14.1	( Unigene56756_A0A and Unigene53088_A0A )	N	0	1000	0	2
R08268	formation of N-Desmethyltamoxifen	[c] : C07108 <==> C16546	Drug metabolism - cytochrome P450	Xenobiotics Biodegradation and Metabolism	1.14.14.1	( CL367.Contig1_A0A and CL1618.Contig1_A0A and Unigene37775_A0A and Unigene28120_A0A and Unigene48800_A0A and Unigene20529_A0A and Unigene25620_A0A ) or ( Unigene20555_A0A )	N	0	1000	0	2
R08269	formation of 4-Hydroxy-N-desmethyltamoxifen	[c] : C05011 <==> C16547	Drug metabolism - cytochrome P450	Xenobiotics Biodegradation and Metabolism	1.14.14.1	( CL367.Contig1_A0A and CL1618.Contig1_A0A and Unigene37775_A0A and Unigene28120_A0A and Unigene48800_A0A and Unigene20529_A0A and Unigene25620_A0A ) or ( Unigene20555_A0A )	N	0	1000	0	2
R08270	formation of 4-Hydroxy-N-desmethyltamoxifen	[c] : C16546 + C00005 + C00007 + C00080 <==> C16547 + C00006 + C00001	Drug metabolism - cytochrome P450	Xenobiotics Biodegradation and Metabolism	1.14.14.1	( Unigene56756_A0A and Unigene53088_A0A )	N	0	1000	0	2
R08271	formation of alpha-Hydroxytamoxifen	[c] : C07108 + C00005 + C00007 + C00080 <==> C16544 + C00006 + C00001	Drug metabolism - cytochrome P450	Xenobiotics Biodegradation and Metabolism	1.14.14.1	( CL367.Contig1_A0A and CL1618.Contig1_A0A and Unigene37775_A0A and Unigene28120_A0A and Unigene48800_A0A and Unigene20529_A0A and Unigene25620_A0A ) or ( Unigene20555_A0A )	N	0	1000	0	2
R08272	formation of N,N-Didesmethyltamoxifen	[c] : C16546 <==> C16548	Drug metabolism - cytochrome P450	Xenobiotics Biodegradation and Metabolism	1.14.14.1	( CL367.Contig1_A0A and CL1618.Contig1_A0A and Unigene37775_A0A and Unigene28120_A0A and Unigene48800_A0A and Unigene20529_A0A and Unigene25620_A0A ) or ( Unigene20555_A0A )	N	0	1000	0	2
R08273	formation of 13,16-Docosadienoic acid	[c] : C16645 + C00001 <==> C00010 + C16533	Biosynthesis of unsaturated fatty acids	Lipid Metabolism			N	0	1000	0	2
R08274	formation of alpha-Hydroxy-N-desmethyltamoxifen	[c] : C16546 + C00005 + C00080 + C00007 <==> C16549 + C00001 + C00006	Drug metabolism - cytochrome P450	Xenobiotics Biodegradation and Metabolism	1.14.14.1	( CL367.Contig1_A0A and CL1618.Contig1_A0A and Unigene37775_A0A and Unigene28120_A0A and Unigene48800_A0A and Unigene20529_A0A and Unigene25620_A0A ) or ( Unigene20555_A0A )	N	0	1000	0	2
R08275	formation of 4-Hydroxycyclophosphamide	[c] : C07888 + C00005 + C00080 + C00007 <==> C07643 + C00006 + C00001	Drug metabolism - cytochrome P450	Xenobiotics Biodegradation and Metabolism	1.14.14.1	( CL367.Contig1_A0A and CL1618.Contig1_A0A and Unigene37775_A0A and Unigene17263_A0A and Unigene1928_A0A and Unigene28120_A0A and Unigene17247_A0A and Unigene48800_A0A and Unigene20529_A0A and Unigene25620_A0A ) or ( Unigene47728_A0A and Unigene15980_A0A and Unigene20555_A0A )	N	0	1000	0	2
R08276	formation of Dechloroethylcyclophosphamide	[c] : C07888 <==> C16550 + C06754	Drug metabolism - cytochrome P450	Xenobiotics Biodegradation and Metabolism	1.14.14.1	( CL367.Contig1_A0A and CL1618.Contig1_A0A and Unigene37775_A0A and Unigene28120_A0A and Unigene48800_A0A and Unigene20529_A0A and Unigene25620_A0A ) or ( Unigene20555_A0A )	N	0	1000	0	2
R08277	formation of 4-Ketocyclophosphamide	[c] : C07643 <==> C07644	Drug metabolism - cytochrome P450	Xenobiotics Biodegradation and Metabolism	1.14.14.1	( CL367.Contig1_A0A and CL1618.Contig1_A0A and Unigene37775_A0A and Unigene28120_A0A and Unigene48800_A0A and Unigene20529_A0A and Unigene25620_A0A ) or ( Unigene20555_A0A )	N	0	1000	0	2
R08278	formation of Aldophosphamide	[c] : C07643 <==> C07645	Drug metabolism - cytochrome P450	Xenobiotics Biodegradation and Metabolism			Y	-1000	1000	0	1
R08280	4-glutathionyl cyclophosphamide hydrolase	[c] : C07645 + C00051 <==> C11583 + C00001	Drug metabolism - cytochrome P450	Xenobiotics Biodegradation and Metabolism	2.5.1.18	( Unigene19265_A0A and Unigene20954_A0A and Unigene20526_A0A and Unigene25462_A0A and Unigene8197_A0A and Unigene9592_A0A and Unigene39496_A0A and Unigene48309_A0A and Unigene49719_A0A and Unigene42745_A0A and Unigene30993_A0A and Unigene29077_A0A and Unigene56349_A0A ) or ( Unigene12031_A0A )	N	0	1000	0	2
R08281	alcophosphamide:NAD+ oxidoreductase	[c] : C07645 + C00004 + C00080 <==> C16551 + C00003	Drug metabolism - cytochrome P450	Xenobiotics Biodegradation and Metabolism	1.1.1.1	( Unigene20718_A0A ) or ( Unigene49428_A0A )	N	0	1000	0	2
R08282	carboxyphosphamide:NAD+ oxidoreductase	[c] : C07645 + C00003 + C00001 <==> C07646 + C00004 + C00080	Drug metabolism - cytochrome P450	Xenobiotics Biodegradation and Metabolism	1.2.1.5	( Unigene25877_A0A and Unigene2472_A0A ) or ( Unigene48345_A0A )	N	0	1000	0	2
R08283	carboxyphosphamide:NADP+ oxidoreductase	[c] : C07645 + C00006 + C00001 <==> C07646 + C00005 + C00080	Drug metabolism - cytochrome P450	Xenobiotics Biodegradation and Metabolism	1.2.1.5	( Unigene25877_A0A and Unigene2472_A0A ) or ( Unigene48345_A0A )	N	0	1000	0	2
R08285	formation of 4-Hydroxyifosfamide	[c] : C07047 + C00005 + C00080 + C00007 <==> C16553 + C00006 + C00001	Drug metabolism - cytochrome P450	Xenobiotics Biodegradation and Metabolism	1.14.14.1	( CL367.Contig1_A0A and CL1618.Contig1_A0A and Unigene37775_A0A and Unigene17263_A0A and Unigene1928_A0A and Unigene28120_A0A and Unigene17247_A0A and Unigene48800_A0A and Unigene20529_A0A and Unigene25620_A0A ) or ( Unigene47728_A0A and Unigene15980_A0A and Unigene20555_A0A )	N	0	1000	0	2
R08286	formation of Dechloroethylcyclophosphamide	[c] : C07047 <==> C16550 + C06754	Drug metabolism - cytochrome P450	Xenobiotics Biodegradation and Metabolism	1.14.14.1	( CL367.Contig1_A0A and CL1618.Contig1_A0A and Unigene37775_A0A and Unigene1928_A0A and Unigene28120_A0A and Unigene17247_A0A and Unigene48800_A0A and Unigene20529_A0A and Unigene25620_A0A ) or ( Unigene47728_A0A and Unigene20555_A0A )	N	0	1000	0	2
R08287	formation of 2-Dechloroethylifosfamide	[c] : C07047 <==> C16555 + C06754	Drug metabolism - cytochrome P450	Xenobiotics Biodegradation and Metabolism	1.14.14.1	( CL367.Contig1_A0A and CL1618.Contig1_A0A and Unigene37775_A0A and Unigene1928_A0A and Unigene28120_A0A and Unigene17247_A0A and Unigene48800_A0A and Unigene20529_A0A and Unigene25620_A0A )	N	0	1000	0	2
R08293	formation of Monoethylglycinexylidide	[c] : C07073 <==> C16561	Drug metabolism - cytochrome P450	Xenobiotics Biodegradation and Metabolism	1.14.14.1	( CL367.Contig1_A0A and CL1618.Contig1_A0A and Unigene37775_A0A and Unigene28120_A0A and Unigene48800_A0A and Unigene20529_A0A and Unigene25620_A0A ) or ( Unigene20555_A0A )	N	0	1000	0	2
R08294	formation of 3-Hydroxylidocaine	[c] : C07073 + C00005 + C00007 + C00080 <==> C16560 + C00006 + C00001	Drug metabolism - cytochrome P450	Xenobiotics Biodegradation and Metabolism	1.14.14.1	( CL367.Contig1_A0A and CL1618.Contig1_A0A and Unigene37775_A0A and Unigene28120_A0A and Unigene48800_A0A and Unigene20529_A0A and Unigene25620_A0A ) or ( Unigene20555_A0A )	N	0	1000	0	2
R08303	formation of p-Hydroxyfelbamate	[c] : C07501 + C00005 + C00080 + C00007 <==> C16584 + C00006 + C00001	Drug metabolism - cytochrome P450	Xenobiotics Biodegradation and Metabolism	1.14.14.1	( CL367.Contig1_A0A and CL1618.Contig1_A0A and Unigene37775_A0A and Unigene28120_A0A and Unigene48800_A0A and Unigene20529_A0A and Unigene25620_A0A ) or ( Unigene20555_A0A )	N	0	1000	0	2
R08304	formation of 2-Hydroxyfelbamate	[c] : C07501 + C00005 + C00080 + C00007 <==> C16582 + C00006 + C00001	Drug metabolism - cytochrome P450	Xenobiotics Biodegradation and Metabolism	1.14.14.1	( CL367.Contig1_A0A and CL1618.Contig1_A0A and Unigene37775_A0A and Unigene28120_A0A and Unigene48800_A0A and Unigene20529_A0A and Unigene25620_A0A ) or ( Unigene20555_A0A )	N	0	1000	0	2
R08305	formation of 2-Phenyl-1,3-propanediol monocarbamate	[c] : C07501 + C00001 <==> C16586 + C00011 + C00014	Drug metabolism - cytochrome P450	Xenobiotics Biodegradation and Metabolism			N	0	1000	0	1
R08306	2-phenyl-1,3-propanediol monocarbamate:NAD+ oxidoreductase	[c] : C16586 + C00003 <==> C16587 + C00004 + C00080	Drug metabolism - cytochrome P450	Xenobiotics Biodegradation and Metabolism	1.1.1.1	( Unigene20718_A0A ) or ( Unigene49428_A0A )	N	0	1000	0	2
R08307	3-carbamoyl-2-phenylpropionaldehyde:NAD+ oxidoreductase	[c] : C16587 + C00003 + C00001 <==> C16591 + C00004 + C00080	Drug metabolism - cytochrome P450	Xenobiotics Biodegradation and Metabolism	1.2.1.5	( Unigene25877_A0A and Unigene2472_A0A ) or ( Unigene48345_A0A )	N	0	1000	0	2
R08309	formation of 4-Hydroxy-5-phenyltetrahydro-1,3-oxazin-2-one	[c] : C16587 <==> C16595	Drug metabolism - cytochrome P450	Xenobiotics Biodegradation and Metabolism			Y	-1000	1000	0	1
R08310	4-hydroxy-5-phenyltetrahydro-1,3-oxazin-2-one:NAD+ oxidoreductase	[c] : C16595 + C00003 <==> C16596 + C00004 + C00080	Drug metabolism - cytochrome P450	Xenobiotics Biodegradation and Metabolism	1.1.1.1	( Unigene20718_A0A ) or ( Unigene49428_A0A )	N	0	1000	0	2
R08311	formation of 3-Carbamoyl-2-phenylpropionic acid	[c] : C16596 + C00001 <==> C16591	Drug metabolism - cytochrome P450	Xenobiotics Biodegradation and Metabolism			N	0	1000	0	1
R08312	formation of Carbamazepine-10,11-epoxide	[c] : C06868 + C00005 + C00080 + C00007 <==> C07496 + C00006 + C00001	Drug metabolism - cytochrome P450	Xenobiotics Biodegradation and Metabolism	1.14.14.1	( CL367.Contig1_A0A and CL1618.Contig1_A0A and Unigene37775_A0A and Unigene17263_A0A and Unigene1928_A0A and Unigene28120_A0A and Unigene48800_A0A and Unigene20529_A0A and Unigene25620_A0A ) or ( Unigene15980_A0A and Unigene20555_A0A )	N	0	1000	0	2
R08313	formation of 3-Hydroxycarbamazepine	[c] : C06868 + C00005 + C00080 + C00007 <==> C16602 + C00006 + C00001	Drug metabolism - cytochrome P450	Xenobiotics Biodegradation and Metabolism	1.14.14.1	( CL367.Contig1_A0A and CL1618.Contig1_A0A and Unigene37775_A0A and Unigene1928_A0A and Unigene28120_A0A and Unigene17247_A0A and Unigene48800_A0A and Unigene20529_A0A and Unigene25620_A0A ) or ( Unigene47728_A0A and Unigene20555_A0A )	N	0	1000	0	2
R08317	formation of 2-Hydroxycarbamazepine	[c] : C06868 <==> C16601	Drug metabolism - cytochrome P450	Xenobiotics Biodegradation and Metabolism			N	0	1000	0	1
R08318	formation of 2-Hydroxyiminostilbene	[c] : C16601 <==> C16604	Drug metabolism - cytochrome P450	Xenobiotics Biodegradation and Metabolism	1.14.14.1	( CL367.Contig1_A0A and CL1618.Contig1_A0A and Unigene37775_A0A and Unigene28120_A0A and Unigene48800_A0A and Unigene20529_A0A and Unigene25620_A0A ) or ( Unigene20555_A0A )	N	0	1000	0	2
R08324	formation of 2-n-Propyl-4-pentenoic acid	[c] : C07185 <==> C16648	Drug metabolism - cytochrome P450	Xenobiotics Biodegradation and Metabolism	1.14.14.1	( Unigene53088_A0A and Unigene17263_A0A and Unigene1928_A0A and Unigene17247_A0A ) or ( Unigene47728_A0A and Unigene15980_A0A )	N	0	1000	0	2
R08325	formation of 4-Hydroxyvalproic acid	[c] : C07185 + C00005 + C00080 + C00007 <==> C16649 + C00006 + C00001	Drug metabolism - cytochrome P450	Xenobiotics Biodegradation and Metabolism	1.14.14.1	( Unigene53088_A0A and Unigene17263_A0A and Unigene1928_A0A and Unigene17247_A0A ) or ( Unigene47728_A0A and Unigene15980_A0A )	N	0	1000	0	2
R08326	formation of 5-Hydroxyvalproic acid	[c] : C07185 + C00005 + C00080 + C00007 <==> C16650 + C00006 + C00001	Drug metabolism - cytochrome P450	Xenobiotics Biodegradation and Metabolism	1.14.14.1	( Unigene53088_A0A and Unigene17263_A0A and Unigene1928_A0A and Unigene17247_A0A ) or ( Unigene47728_A0A and Unigene15980_A0A )	N	0	1000	0	2
R08327	formation of 3-Hydroxyvalproic acid	[c] : C07185 + C00005 + C00080 + C00007 <==> C16651 + C00006 + C00001	Drug metabolism - cytochrome P450	Xenobiotics Biodegradation and Metabolism	1.14.14.1	Unigene53088_A0A	N	0	1000	0	2
R08339	formation of 2-Ethylidene-1,5-dimethyl-3,3-diphenylpyrrolidine	[c] : C07163 <==> C16659	Drug metabolism - cytochrome P450	Xenobiotics Biodegradation and Metabolism	1.14.14.1	( CL367.Contig1_A0A and CL1618.Contig1_A0A and Unigene37775_A0A and Unigene28120_A0A and Unigene48800_A0A and Unigene20529_A0A and Unigene25620_A0A ) or ( Unigene20555_A0A )	N	0	1000	0	2
R08340	formation of 2-Ethyl-5-methyl-3,3-diphenyl-1-pyrroline	[c] : C16659 <==> C16660	Drug metabolism - cytochrome P450	Xenobiotics Biodegradation and Metabolism	1.14.14.1	( CL367.Contig1_A0A and CL1618.Contig1_A0A and Unigene37775_A0A and Unigene28120_A0A and Unigene48800_A0A and Unigene20529_A0A and Unigene25620_A0A ) or ( Unigene20555_A0A )	N	0	1000	0	2
R08341	formation of L-alpha-Acetyl-N-normethadol	[c] : C08012 <==> C16661	Drug metabolism - cytochrome P450	Xenobiotics Biodegradation and Metabolism	1.14.14.1	( CL367.Contig1_A0A and CL1618.Contig1_A0A and Unigene37775_A0A and Unigene28120_A0A and Unigene48800_A0A and Unigene20529_A0A and Unigene25620_A0A ) or ( Unigene20555_A0A )	N	0	1000	0	2
R08342	formation of L-alpha-Acetyl-N,N-dinormethadol	[c] : C16661 <==> C16662	Drug metabolism - cytochrome P450	Xenobiotics Biodegradation and Metabolism	1.14.14.1	( CL367.Contig1_A0A and CL1618.Contig1_A0A and Unigene37775_A0A and Unigene28120_A0A and Unigene48800_A0A and Unigene20529_A0A and Unigene25620_A0A ) or ( Unigene20555_A0A )	N	0	1000	0	2
R08343	formation of Demethylcitalopram	[c] : C07572 <==> C16608	Drug metabolism - cytochrome P450	Xenobiotics Biodegradation and Metabolism	1.14.14.1	( CL367.Contig1_A0A and CL1618.Contig1_A0A and Unigene56756_A0A and Unigene53088_A0A and Unigene37775_A0A and Unigene17263_A0A and Unigene1928_A0A and Unigene28120_A0A and Unigene48800_A0A and Unigene20529_A0A and Unigene25620_A0A ) or ( Unigene15980_A0A and Unigene20555_A0A )	N	0	1000	0	2
R08344	formation of Citalopram N-oxide	[c] : C07572 <==> C16607	Drug metabolism - cytochrome P450	Xenobiotics Biodegradation and Metabolism	1.14.14.1	( Unigene56756_A0A and Unigene53088_A0A )	N	0	1000	0	2
R08345	formation of Didemethylcitalopram	[c] : C16608 <==> C16609	Drug metabolism - cytochrome P450	Xenobiotics Biodegradation and Metabolism	1.14.14.1	( Unigene56756_A0A and Unigene53088_A0A )	N	0	1000	0	2
R08359	S-adenosylmethioninamine:cadaverine 3-aminopropyltransferase	[c] : C01137 + C01672 <==> C00170 + C16565	Glutathione metabolism	Metabolism of Other Amino Acids	2.5.1.16	Unigene43513_A0A	N	0	1000	0	2
R08379	retinol: NADP+ oxidoreductase	[c] : C00473 + C00006 <==> C00376 + C00005 + C00080	Retinol metabolism	Metabolism of Cofactors and Vitamins	1.1.1.-	( Unigene44737_A0A and Unigene18805_A0A and Unigene51315_A0A and Unigene46882_A0A and Unigene3831_A0A and Unigene6481_A0A and Unigene27225_A0A and Unigene47367_A0A and Unigene10050_A0A and Unigene24387_A0A and Unigene7017_A0A ) or ( Unigene18804_A0A and Unigene27327_A0A and Unigene18807_A0A )	Y	-1000	1000	0	2
R08380	11-cis-retinol: NADP+ oxidoreductase	[c] : C02110 + C00005 + C00080 <==> C00899 + C00006	Retinol metabolism	Metabolism of Cofactors and Vitamins	1.1.1.-	( Unigene51315_A0A and Unigene3831_A0A and Unigene47367_A0A and Unigene10050_A0A and Unigene24387_A0A and Unigene7017_A0A )	Y	-1000	1000	0	2
R08381	Palmitoyl-CoA:retinol O-acyltransferase	[c] : C00154 + C00899 <==> C00010 + C03455	Retinol metabolism	Metabolism of Cofactors and Vitamins	2.3.1.76	( Unigene12092_A0A ) or ( Unigene26599_A0A and Unigene21893_A0A )	N	0	1000	0	2
R08383	formation of 9-cis-Retinal	[c] : C16682 + C00006 <==> C16681 + C00005 + C00080	Retinol metabolism	Metabolism of Cofactors and Vitamins	1.1.1.-	( Unigene44737_A0A and Unigene51315_A0A and Unigene46882_A0A and Unigene3831_A0A and Unigene6481_A0A and Unigene27225_A0A and Unigene47367_A0A and Unigene10050_A0A and Unigene24387_A0A and Unigene7017_A0A )	Y	-1000	1000	0	2
R08385	retinal:NAD+ oxidoreductase	[c] : C16681 + C00003 + C00001 <==> C15493 + C00004 + C00080	Retinol metabolism	Metabolism of Cofactors and Vitamins	1.2.1.36	Unigene25916_A0A	N	0	1000	0	2
R08388	all-trans-retinyl ester isomerohydrolase	[c] : C02075 + C00001 <==> C00899 + C00162	Retinol metabolism	Metabolism of Cofactors and Vitamins			N	0	1000	0	1
R08390	formation of all-trans-18-Hydroxyretinoic acid	[c] : C00777 + C00005 + C00080 + C00007 <==> C16679 + C00006 + C00001	Retinol metabolism	Metabolism of Cofactors and Vitamins	1.14.14.1	( CL367.Contig1_A0A and CL1618.Contig1_A0A and Unigene53088_A0A and Unigene37775_A0A and Unigene17263_A0A and Unigene1928_A0A and Unigene28120_A0A and Unigene17247_A0A and Unigene48800_A0A and Unigene20529_A0A and Unigene25620_A0A ) or ( Unigene47728_A0A and Unigene15980_A0A and Unigene20555_A0A )	N	0	1000	0	2
R08391	formation of all-trans-5,6-Epoxyretinoic acid	[c] : C00777 + C00005 + C00080 + C00007 <==> C16680 + C00006 + C00001	Retinol metabolism	Metabolism of Cofactors and Vitamins	1.14.14.1	( CL367.Contig1_A0A and CL1618.Contig1_A0A and Unigene53088_A0A and Unigene37775_A0A and Unigene1928_A0A and Unigene28120_A0A and Unigene17247_A0A and Unigene48800_A0A and Unigene20529_A0A and Unigene25620_A0A ) or ( Unigene47728_A0A and Unigene20555_A0A )	N	0	1000	0	2
R08392	formation of all-trans-4-Hydroxyretinoic acid	[c] : C00777 + C00005 + C00080 + C00007 <==> C16677 + C00006 + C00001	Retinol metabolism	Metabolism of Cofactors and Vitamins	1.14.14.1	( CL367.Contig1_A0A and CL1618.Contig1_A0A and Unigene53088_A0A and Unigene37775_A0A and Unigene17263_A0A and Unigene1928_A0A and Unigene28120_A0A and Unigene17247_A0A and Unigene48800_A0A and Unigene20529_A0A and Unigene25620_A0A ) or ( Unigene47728_A0A and Unigene15980_A0A and Unigene20555_A0A )	N	0	1000	0	2
R08615	UDP-glucuronate glucuronohydrolase	[c] : C00167 + C00001 <==> C00015 + C00191	Ascorbate and aldarate metabolism	Carbohydrate Metabolism	2.4.1.17;3.2.1.-	( Unigene49795_A0A ) or ( Unigene49794_A0A and Unigene48897_A0A and Unigene14677_A0A and Unigene27751_A0A and Unigene44191_A0A and Unigene32852_A0A )	N	0	1000	0	2
R08618	L-methionine:2-oxo-acid aminotransferase;L-alpha-Amino acid transaminases:using miscellaneous 2-oxo acids/L-alpha-amino acids	[c] : C00073 + C00161 <==> C01180 + C00151	Cysteine and methionine metabolism	Amino Acid Metabolism	2.6.1.-		Y	-1000	1000	0	1
R08639	alpha-D-glucose 1,6-phosphomutase	[c] : C00103 <==> C00092	Streptomycin biosynthesis	Biosynthesis of Other Secondary Metabolites	5.4.2.2;5.4.2.5	( Unigene45872_A0A and Unigene40267_A0A and Unigene11367_A0A )	Y	-1000	1000	0	2
R08714	putrescine:pyruvate aminotransferase	[c] : C00134 + C00022 <==> C00555 + C00041	Arginine and proline metabolism	Amino Acid Metabolism	2.6.1.-		N	0	1000	0	1
R08734	3alpha,7alpha,12alpha-trihydroxy-5beta-cholestan-26-oyl-CoA 25-epimerase	[c] : C15613 <==> C17343	Primary bile acid biosynthesis	Lipid Metabolism	5.1.99.4	Unigene43722_A0A	N	0	1000	0	2
R08735	(25S)-3alpha,7alpha,12alpha-trihydroxy-5beta-cholestan-26-oyl-CoA:acceptor 24,25-oxidoreductase	[c] : C17343 + C00028 <==> C05460 + C00030	Primary bile acid biosynthesis	Lipid Metabolism	1.17.99.3	Unigene41487_A0A	N	0	1000	0	2
R08739	3alpha,7alpha-dihydroxy-5beta-cholestanoyl-CoA 25-epimerase	[c] : C17345 <==> C17346	Primary bile acid biosynthesis	Lipid Metabolism	5.1.99.4	Unigene43722_A0A	N	0	1000	0	2
R08740	(25S)-3alpha,7alpha-dihydroxy-5beta-cholestanoyl-CoA:acceptor 24,25-oxidoreductase	[c] : C17346 + C00028 <==> C05447 + C00030	Primary bile acid biosynthesis	Lipid Metabolism	1.17.99.3	Unigene41487_A0A	N	0	1000	0	2
R08770	formation of 3-Polyprenyl-4,5-dihydroxybenzoate	[c] : C05848 + C00007 <==> C17554	Ubiquinone and other terpenoid-quinone biosynthesis	Metabolism of Cofactors and Vitamins			N	0	1000	0	1
R08771	S-adenosyl-L-methionine:3-Polyprenyl-4,5-dihydroxylate 5-O-methyltransferase	[c] : C17554 + C00019 <==> C17559 + C00021	Ubiquinone and other terpenoid-quinone biosynthesis	Metabolism of Cofactors and Vitamins	2.1.1.114	( Unigene16058_A0A and Unigene22287_A0A )	N	0	1000	0	2
R08774	formation of 2-Polyprenyl-3-methyl-6-methoxy-1,4-benzoquinone	[c] : C17560 + C00019 <==> C17561 + C00021	Ubiquinone and other terpenoid-quinone biosynthesis	Metabolism of Cofactors and Vitamins	2.1.1.-	Unigene29449_A0A	N	0	1000	0	2
R08775	formation of 2-Polyprenyl-3-methyl-5-hydroxy-6-methoxy-1,4-benzoquinone	[c] : C17561 + C00007 + C00005 + C00080 <==> C17562 + C00006 + C00001	Ubiquinone and other terpenoid-quinone biosynthesis	Metabolism of Cofactors and Vitamins	1.14.13.-	( Unigene33598_A0A and Unigene6224_A0A )	N	0	1000	0	2
R08781	S-adenosyl-L-methionine:3-hydroxy-2-methoxy-5-methyl-6-(all-trans-polyprenyl)-1,4-benzoquinone 3-O-methyltransferase	[c] : C17562 + C00019 <==> C00399 + C00021	Ubiquinone and other terpenoid-quinone biosynthesis	Metabolism of Cofactors and Vitamins	2.1.1.64;2.1.1.114	( Unigene16058_A0A and Unigene22287_A0A )	N	0	1000	0	2
R08815	trans-cinnamate,NADPH:oxygen oxidoreductase (4-hydroxylating)	[c] : C00540 + C00007 + C00005 + C00080 <==> C00223 + C00006 + C00001	Phenylpropanoid biosynthesis	Biosynthesis of Other Secondary Metabolites	1.14.13.11		N	0	1000	0	1
R08945	11beta,17beta-dihydroxy-4-androsten-3-one:NAD+ 17-oxidoreductase	[c] : C05284 + C00004 + C00080 <==> C18075 + C00003	Steroid hormone biosynthesis	Lipid Metabolism	1.1.1.62	( CL1335.Contig1_A0A and Unigene55738_A0A and Unigene42209_A0A and Unigene33351_A0A and Unigene36628_A0A and Unigene26770_A0A and Unigene3717_A0A and Unigene4816_A0A and Unigene21440_A0A and Unigene46607_A0A and Unigene41101_A0A ) or ( Unigene3097_A0A and Unigene3098_A0A )	N	0	1000	0	2
R08969	ceramide:phosphatidylcholine cholinephosphotransferase	[c] : C00195 + C00157 <==> C00550 + C00641	Sphingolipid metabolism	Lipid Metabolism	2.7.8.27	Unigene17024_A0A	Y	-1000	1000	0	2
R08980	11beta,17beta-dihydroxy-4-androsten-3-one:NADP+ 17-oxidoreductase	[c] : C05284 + C00005 + C00080 <==> C18075 + C00006	Steroid hormone biosynthesis	Lipid Metabolism	1.1.1.62	( CL1335.Contig1_A0A and Unigene55738_A0A and Unigene42209_A0A and Unigene33351_A0A and Unigene36628_A0A and Unigene26770_A0A and Unigene3717_A0A and Unigene4816_A0A and Unigene21440_A0A and Unigene46607_A0A and Unigene41101_A0A ) or ( Unigene3097_A0A and Unigene3098_A0A )	N	0	1000	0	2
R08995	formation of 11beta-Hydroxyandrost-4-ene-3,17-dione	[c] : C00735 <==> C05284	Steroid hormone biosynthesis	Lipid Metabolism			N	0	1000	0	1
R09034	acyl-CoA:1-acyl-sn-glycero-3-phosphoinositol O-acyltransferase	[c] : C00040 + C03819 <==> C00010 + C01194	Glycerophospholipid metabolism	Lipid Metabolism	2.3.1.-	( Unigene52235_A0A and Unigene30242_A0A and Unigene27595_A0A ) or ( Unigene529_A0A )	N	0	1000	0	2
R09035	acyl-CoA:1-acyl-sn-glycero-3-phosphoserine O-acyltransferase	[c] : C00040 + C18125 <==> C00010 + C02737	Glycerophospholipid metabolism	Lipid Metabolism	2.3.1.-	( Unigene7212_A0A and Unigene35936_A0A and Unigene26459_A0A and Unigene35615_A0A and Unigene4111_A0A and Unigene43875_A0A )	N	0	1000	0	2
R09036	acyl-CoA:1-acyl-sn-glycero-3-phosphoglycerol O-acyltransferase	[c] : C00040 + C18126 <==> C00010 + C00344	Glycerophospholipid metabolism	Lipid Metabolism	2.3.1.-	( Unigene52235_A0A ) or ( Unigene43835_A0A )	N	0	1000	0	2
R09037	formation of Cardiolipin	[c] : C00040 + C18129 <==> C00010 + C05980	Glycerophospholipid metabolism	Lipid Metabolism	2.3.1.-	Unigene52235_A0A	N	0	1000	0	2
R09085	ADP:D-glucose 6-phosphotransferase	[c] : C00267 + C00008 <==> C00668 + C00020	Glycolysis / Gluconeogenesis	Carbohydrate Metabolism	2.7.1.147	Unigene52389_A0A	N	0	1000	0	2
R09086	ADP:D-glucose 6-phosphotransferase	[c] : C00221 + C00008 <==> C01172 + C00020	Glycolysis / Gluconeogenesis	Carbohydrate Metabolism	2.7.1.147	Unigene52389_A0A	Y	-1000	1000	0	2
R09093	formation of 5,10-Methylenetetrahydrofolate	[c] : C00101 + C00067 <==> C00143	Methane metabolism	Energy Metabolism			N	0	1000	0	1
R09094	formation of Formate	[c] : C00058 <==> C00011	Methane metabolism	Energy Metabolism			N	0	1000	0	1
R09099	5,10-methylenetetrahydromethanopterin:glycine hydroxymethyltransferase	[c] : C00065 + C01217 <==> C04377 + C00037 + C00001	Methane metabolism	Energy Metabolism	2.1.2.1	( Unigene39808_A0A and Unigene46039_A0A and Unigene53763_A0A and Unigene38757_A0A and Unigene52346_A0A )	N	0	1000	0	2
R09144	formation of Glyoxylate	[c] : C11148 <==> C00048	Chloroalkane and chloroalkene degradation	Xenobiotics Biodegradation and Metabolism			N	0	1000	0	1
R09145	formation of Formate	[c] : C11148 <==> C00058	Chloroalkane and chloroalkene degradation	Xenobiotics Biodegradation and Metabolism			N	0	1000	0	1
R09149	formation of Chloral	[c] : C07490 <==> C14866	Chloroalkane and chloroalkene degradation	Xenobiotics Biodegradation and Metabolism	1.1.-.-		Y	-1000	1000	0	1
R09150	formation of Trichloroacetate	[c] : C14866 <==> C11150	Chloroalkane and chloroalkene degradation	Xenobiotics Biodegradation and Metabolism	1.1.-.-		N	0	1000	0	1
R09151	toluene dioxygenase	[c] : C06790 + C00001 <==> C00048 + 3 C01327	Chloroalkane and chloroalkene degradation	Xenobiotics Biodegradation and Metabolism	1.14.12.11		N	0	1000	0	1
R09152	toluene dioxygenase	[c] : C06790 + 2 C00001 <==> C00058 + 3 C01327	Chloroalkane and chloroalkene degradation	Xenobiotics Biodegradation and Metabolism	1.14.12.11		N	0	1000	0	1
R09158	Transformation of Trichloroacetate to CO2	[c] : C11150 <==> C00011	Chloroalkane and chloroalkene degradation	Xenobiotics Biodegradation and Metabolism			N	0	1000	0	1
R09245	(2E,6E)-farnesyl-diphosphate:isopentenyl-diphosphate farnesyltranstransferase (adding 3 isopentenyl units)	[c] : C00448 + 3 C00129 <==> C01230 + 3 C00013	Terpenoid backbone biosynthesis	Metabolism of Terpenoids and Polyketides	2.5.1.83		N	0	1000	0	1
R09249	(2E,6E)-farnesyl-diphosphate:isopentenyl-diphosphate farnesyltranstransferase (adding 7 isopentenyl units)	[c] : C00448 + 7 C00129 <==> C17432 + 7 C00013	Terpenoid backbone biosynthesis	Metabolism of Terpenoids and Polyketides	2.5.1.91	( Unigene43056_A0A and Unigene52863_A0A )	N	0	1000	0	2
R09319	formation of G10770	[c] : G10615 + G00014 <==> G10620 + G10770	Various types of N-glycan biosynthesis	Glycan Biosynthesis and Metabolism	2.4.1.68	( Unigene5408_A0A and Unigene17357_A0A and Unigene53815_A0A )	N	0	1000	0	2
R09320	formation of G13057	[c] : G10609 + G10770 <==> G10619 + G13057	Various types of N-glycan biosynthesis	Glycan Biosynthesis and Metabolism	2.4.1.-		N	0	1000	0	1
R09323	formation of G13058	[c] : G13057 + C00001 <==> C00140 + G13058	Various types of N-glycan biosynthesis	Glycan Biosynthesis and Metabolism	3.2.1.52	( Unigene11464_A0A and Unigene35856_A0A and Unigene53748_A0A and Unigene18141_A0A and Unigene36388_A0A and Unigene36183_A0A and Unigene17755_A0A and Unigene24214_A0A )	N	0	1000	0	2
R09324	formation of G13059	[c] : G10615 + G13058 <==> G10620 + G13059	Various types of N-glycan biosynthesis	Glycan Biosynthesis and Metabolism	2.4.1.-	Unigene35420_A0A	N	0	1000	0	2
R09365	5-methyltetrahydropteroyltri-L-glutamate:L-selenohomocysteine Se-methyltransferase	[c] : C05698 + C04489 <==> C05335 + C04144	Selenocompound metabolism	Metabolism of Other Amino Acids	2.1.1.13;2.1.1.14	( Unigene14812_A0A and Unigene4513_A0A and Unigene51972_A0A and Unigene4090_A0A and Unigene4171_A0A and Unigene33399_A0A and Unigene16132_A0A )	N	0	1000	0	2
R09366	Se-methyl-L-selenocysteine methaneselenol-lyase (deaminating; pyruvate-forming)	[c] : C05689 + C00001 <==> C00022 + C00014 + C05703	Selenocompound metabolism	Metabolism of Other Amino Acids	4.4.1.16	Unigene39029_A0A	N	0	1000	0	2
R09371	S-adenosyl-L-methionine:hydrogen-selenide Se-methyltransferase	[c] : C00019 + C01528 <==> C00021 + C05703	Selenocompound metabolism	Metabolism of Other Amino Acids	2.1.1.-		Y	-1000	1000	0	1
R09372	methaneselenol:NADP+ oxidoreductase	[c] : 2 C00005 + 2 C00080 + C18902 <==> 2 C00006 + 2 C00001 + C05703	Selenocompound metabolism	Metabolism of Other Amino Acids	1.8.1.9	( Unigene30625_A0A and Unigene13908_A0A and Unigene15237_A0A )	N	0	1000	0	2
R11007	cholesterol,NADH:oxygen oxidoreductase (7,8 dehydrogenating)	[c] : C00187 + C00007 + C00004 + C00080 <==> C01164 + C00003 + 2 C00001	Insect hormone biosynthesis	Metabolism of Terpenoids and Polyketides	1.14.19.21	( Unigene39444_A0A and Unigene467_A0A )	N	0	1000	0	2
R11008	cholesterol,NADH:oxygen oxidoreductase (7,8 dehydrogenating)	[c] : C00187 + C00007 + C00005 + C00080 <==> C01164 + C00006 + 2 C00001	Insect hormone biosynthesis	Metabolism of Terpenoids and Polyketides	1.14.19.21	( Unigene39444_A0A and Unigene467_A0A )	N	0	1000	0	2
R11043	oleoyl-CoA,ferrocytochrome-b5:oxygen oxidoreductase (12,13 cis-dehydrogenating)	[c] : C00510 + 2 C00999 + C00007 + 2 C00080 <==> C02050 + 2 C00996 + 2 C00001	Biosynthesis of unsaturated fatty acids	Lipid Metabolism			N	0	1000	0	2
R11059	8,11,14-eicosatrienoyl-CoA,ferrocytochrome-b5:oxygen oxidoreductase (5,6-cis-dehydrogenating)	[c] : C03595 + 2 C00999 <==> C02249 + 2 C00996	Biosynthesis of unsaturated fatty acids	Lipid Metabolism			N	0	1000	0	2
R11060	(8Z,11Z,14Z,17Z)-icosatetraenoyl-CoA,ferrocytochrome-b5:oxygen oxidoreductase (5,6-cis-dehydrogenating)	[c] : C16164 + 2 C00999 <==> C16165 + 2 C00996	Biosynthesis of unsaturated fatty acids	Lipid Metabolism			N	0	1000	0	2
R12170	formation of (8Z,11Z,14Z,17Z)-Icosatetraenoyl-CoA	[c] : C16179 + 2 C00999 + C00007 + 2 C00080 <==> C16164 + 2 C00996 + 2 C00001	Biosynthesis of unsaturated fatty acids	Lipid Metabolism			N	0	1000	0	2
R12171	formation of 8,11,14-Eicosatrienoyl-CoA	[c] : C16180 + 2 C00999 <==> C03595 + 2 C00996	Biosynthesis of unsaturated fatty acids	Lipid Metabolism			N	0	1000	0	2
R12205	formation of (9Z,12Z,15Z)-Octadecatrienoyl-CoA	[c] : C02050 + 2 C00999 + C00007 + 2 C00080 <==> C16162 + 2 C00996 + 2 C00001	Biosynthesis of unsaturated fatty acids	Lipid Metabolism			N	0	1000	0	2
B00001	formation of (11Z,14Z,17Z)-Icosatrienoyl-CoA	[c] : C16162 <==> C16179	Biosynthesis of unsaturated fatty acids	Lipid Metabolism			N	0	1000	0	2
B00002	formation of (7Z,10Z,13Z,16Z,19Z)-Docosapentaenoyl-CoA	[c] : C16165 <==> C16166	Biosynthesis of unsaturated fatty acids	Lipid Metabolism			N	0	1000	0	2
B00003	formation of (4Z,7Z,10Z,13Z,16Z,19Z)-Docosahexaenoyl-CoA	[c] : C16166 <==> C16169	Biosynthesis of unsaturated fatty acids	Lipid Metabolism			N	0	1000	0	2
B00004	formation of (11Z,14Z)-Icosadienoyl-CoA	[c] : C02050 <==> C16180	Biosynthesis of unsaturated fatty acids	Lipid Metabolism			N	0	1000	0	2
B00005	formation of (13Z,16Z)-Docosadi-13,16-enoyl-CoA	[c] : C16180 <==> C16645	Biosynthesis of unsaturated fatty acids	Lipid Metabolism			N	0	1000	0	2
B00006	formation of Stearoyl-CoA	[c] : C00154 <==> C00412	Biosynthesis of unsaturated fatty acids	Lipid Metabolism			N	0	1000	0	2
B00007	formation of Eicosanoyl-CoA	[c] : C00412 <==> C02041	Biosynthesis of unsaturated fatty acids	Lipid Metabolism			N	0	1000	0	2
B00008	formation of Docosanoyl-CoA	[c] : C02041 <==> C16528	Biosynthesis of unsaturated fatty acids	Lipid Metabolism			N	0	1000	0	2
B00009	formation of Tetracosanoyl-CoA	[c] : C16528 <==> C16529	Biosynthesis of unsaturated fatty acids	Lipid Metabolism			N	0	1000	0	2
B00010	formation of Icosenoyl-CoA	[c] : C00510 <==> C16530	Biosynthesis of unsaturated fatty acids	Lipid Metabolism			N	0	1000	0	2
B00011	formation of Docosenoyl-CoA	[c] : C16530 <==> C16531	Biosynthesis of unsaturated fatty acids	Lipid Metabolism			N	0	1000	0	2
B00012	formation of Tetracosenoyl-CoA	[c] : C16531 <==> C16532	Biosynthesis of unsaturated fatty acids	Lipid Metabolism			N	0	1000	0	2
Biomass	biomass synthesis	[c] : 65.6889 C00001 + 0.0942 C00267 + 0.0325 C02336 + 0.1113 C00049 + 0.0641 C00188 + 0.0577 C00065 + 0.1263 C00025 + 0.1132 C00037 + 0.1109 C00041 + 0.072 C00183 + 0.0244 C00073 + 0.0488 C00407 + 0.0901 C00123 + 0.0517 C00082 + 0.0457 C00079 + 0.0665 C00047 + 0.2246 C00014 + 0.026 C00135 + 0.0559 C00062 + 0.0574 C00148 + 0.0085 C00078 + 0.012 C00097 + 0.0784 C00152 + 0.0709 C00064 + 0.0047 C026…					N	0	1000	1	2
E00001	exchange for L-Alanine	[e] : C00041 <==>	exchange	exchange			N	0	1000	0	2
E00002	exchange for L-Arginine	[e] : C00062 <==>	exchange	exchange			Y	-5	1000	0	2
E00003	exchange for L-Asparagine	[e] : C00152 <==>	exchange	exchange			N	0	1000	0	2
E00004	exchange for L-Aspartate	[e] : C00049 <==>	exchange	exchange			N	0	1000	0	2
E00005	exchange for L-Cysteine	[e] : C00097 <==>	exchange	exchange			N	0	1000	0	2
E00006	exchange for L-Glutamine	[e] : C00064 <==>	exchange	exchange			N	0	1000	0	2
E00007	exchange for L-Glutamate	[e] : C00025 <==>	exchange	exchange			N	0	1000	0	2
E00008	exchange for Glycine	[e] : C00037 <==>	exchange	exchange			N	0	1000	0	2
E00009	exchange for L-Histidine	[e] : C00135 <==>	exchange	exchange			Y	-5	1000	0	2
E00010	exchange for L-Isoleucine	[e] : C00407 <==>	exchange	exchange			Y	-5	1000	0	2
E00011	exchange for L-Leucine	[e] : C00123 <==>	exchange	exchange			Y	-5	1000	0	2
E00012	exchange for L-Lysine	[e] : C00047 <==>	exchange	exchange			Y	-5	1000	0	2
E00013	exchange for L-Methionine	[e] : C00073 <==>	exchange	exchange			Y	-5	1000	0	2
E00014	exchange for L-Phenylalanine	[e] : C00079 <==>	exchange	exchange			Y	-5	1000	0	2
E00015	exchange for L-Proline	[e] : C00148 <==>	exchange	exchange			N	0	1000	0	2
E00016	exchange for L-Serine	[e] : C00065 <==>	exchange	exchange			N	0	1000	0	2
E00017	exchange for L-Threonine	[e] : C00188 <==>	exchange	exchange			Y	-5	1000	0	2
E00018	exchange for L-Tryptophan	[e] : C00078 <==>	exchange	exchange			Y	-5	1000	0	2
E00019	exchange for L-Tyrosine	[e] : C00082 <==>	exchange	exchange			N	0	1000	0	2
E00020	exchange for L-Valine	[e] : C00183 <==>	exchange	exchange			Y	-5	1000	0	2
E00021	exchange for alpha-D-Glucose	[e] : C00267 <==>	exchange	exchange			Y	-5	1000	0	2
E00023	exchange for Manganese	[e] : C00034 <==>	exchange	exchange			Y	-1	1000	0	2
E00024	exchange for Zinc cation	[e] : C00038 <==>	exchange	exchange			Y	-1	1000	0	2
E00025	exchange for Copper	[e] : C00070 <==>	exchange	exchange			Y	-1	1000	0	2
E00026	exchange for Calcium cation	[e] : C00076 <==>	exchange	exchange			Y	-1	1000	0	2
E00027	exchange for Potassium cation	[e] : C00238 <==>	exchange	exchange			Y	-1	1000	0	2
E00028	exchange for Magnesium cation	[e] : C00305 <==>	exchange	exchange			Y	-1	1000	0	2
E00029	exchange for Sodium cation	[e] : C01330 <==>	exchange	exchange			Y	-1	1000	0	2
E00030	exchange for Selenium	[e] : C01529 <==>	exchange	exchange			Y	-1	1000	0	2
E00031	exchange for Phosphorus	[e] : C06262 <==>	exchange	exchange			Y	-1	1000	0	2
E00032	exchange for Fe3+	[e] : C14819 <==>	exchange	exchange			Y	-1	1000	0	2
E00033	exchange for (8Z,11Z,14Z,17Z)-Icosatetraenoyl-CoA	[e] : C16164 <==>	exchange	exchange			N	0	1000	0	2
E00034	exchange for (5Z,8Z,11Z,14Z,17Z)-Icosapentaenoyl-CoA	[e] : C16165 <==>	exchange	exchange			N	0	1000	0	2
E00035	exchange for (9Z,12Z,15Z)-Octadecatrienoyl-CoA	[e] : C16162 <==>	exchange	exchange			N	0	1000	0	2
E00036	exchange for (9Z,12Z,15Z)-Octadecatrienoic acid	[e] : C06427 <==>	exchange	exchange			N	0	1000	0	2
E00037	exchange for (11Z,14Z,17Z)-Icosatrienoyl-CoA	[e] : C16179 <==>	exchange	exchange			N	0	1000	0	2
E00038	exchange for Icosatrienoic acid	[e] : C16522 <==>	exchange	exchange			N	0	1000	0	2
E00039	exchange for (5Z,8Z,11Z,14Z,17Z)-Icosapentaenoic acid	[e] : C06428 <==>	exchange	exchange			N	0	1000	0	2
E00040	exchange for (7Z,10Z,13Z,16Z,19Z)-Docosapentaenoyl-CoA	[e] : C16166 <==>	exchange	exchange			N	0	1000	0	2
E00041	exchange for (4Z,7Z,10Z,13Z,16Z,19Z)-Docosahexaenoic acid	[e] : C06429 <==>	exchange	exchange			N	0	1000	0	2
E00042	exchange for Linoleoyl-CoA	[e] : C02050 <==>	exchange	exchange			Y	-5	1000	0	2
E00043	exchange for Linoleate	[e] : C01595 <==>	exchange	exchange			N	0	1000	0	2
E00044	exchange for Cholesterol	[e] : C00187 <==>	exchange	exchange			Y	-5	1000	0	2
E00045	exchange for Ecdysone	[e] : C00477 <==>	exchange	exchange			N	0	1000	0	2
E00048	exchange for Icosadienoic acid	[e] : C16525 <==>	exchange	exchange			N	0	1000	0	2
E00049	exchange for (11Z,14Z)-Icosadienoyl-CoA	[e] : C16180 <==>	exchange	exchange			N	0	1000	0	2
E00051	exchange for 13,16-Docosadienoic acid	[e] : C16533 <==>	exchange	exchange			N	0	1000	0	2
E00052	exchange for (13Z,16Z)-Docosadi-13,16-enoyl-CoA	[e] : C16645 <==>	exchange	exchange			N	0	1000	0	2
E00053	exchange for (6Z,9Z,12Z)-Octadecatrienoic acid	[e] : C06426 <==>	exchange	exchange			N	0	1000	0	2
E00054	exchange for gamma-Linolenoyl-CoA	[e] : C03035 <==>	exchange	exchange			N	0	1000	0	2
E00055	exchange for (8Z,11Z,14Z)-Icosatrienoic acid	[e] : C03242 <==>	exchange	exchange			N	0	1000	0	2
E00056	exchange for 8,11,14-Eicosatrienoyl-CoA	[e] : C03595 <==>	exchange	exchange			N	0	1000	0	2
E00057	exchange for Stearoyl-CoA	[e] : C00412 <==>	exchange	exchange			N	0	1000	0	2
E00058	exchange for Octadecanoic acid	[e] : C01530 <==>	exchange	exchange			N	0	1000	0	2
E00059	exchange for Icosanoic acid	[e] : C06425 <==>	exchange	exchange			N	0	1000	0	2
E00060	exchange for Eicosanoyl-CoA	[e] : C02041 <==>	exchange	exchange			N	0	1000	0	2
E00061	exchange for Docosanoic acid	[e] : C08281 <==>	exchange	exchange			N	0	1000	0	2
E00062	exchange for Docosanoyl-CoA	[e] : C16528 <==>	exchange	exchange			N	0	1000	0	2
E00063	exchange for Tetracosanoic acid	[e] : C08320 <==>	exchange	exchange			N	0	1000	0	2
E00064	exchange for Tetracosanoyl-CoA	[e] : C16529 <==>	exchange	exchange			N	0	1000	0	2
E00065	exchange for Icosenoic acid	[e] : C16526 <==>	exchange	exchange			N	0	1000	0	2
E00066	exchange for Icosenoyl-CoA	[e] : C16530 <==>	exchange	exchange			N	0	1000	0	2
E00067	exchange for Erucic acid	[e] : C08316 <==>	exchange	exchange			N	0	1000	0	2
E00068	exchange for Docosenoyl-CoA	[e] : C16531 <==>	exchange	exchange			N	0	1000	0	2
E00069	exchange for (15Z)-Tetracosenoic acid	[e] : C08323 <==>	exchange	exchange			N	0	1000	0	2
E00070	exchange for Tetracosenoyl-CoA	[e] : C16532 <==>	exchange	exchange			N	0	1000	0	2
E00071	exchange for (9Z)-Octadecenoic acid	[e] : C00712 <==>	exchange	exchange			N	0	1000	0	2
E00072	exchange for Oleoyl-CoA	[e] : C00510 <==>	exchange	exchange			N	0	1000	0	2
E00073	exchange for Tridecylic acid	[e] : M00001 <==>	exchange	exchange			Y	-5	1000	0	2
E00074	exchange for Margaric acid	[e] : M00002 <==>	exchange	exchange			Y	-5	1000	0	2
E00075	exchange for cis-10- Heptadecenoic acid	[e] : M00003 <==>	exchange	exchange			Y	-5	1000	0	2
E00076	exchange for HeneiCosanoic acid	[e] : M00004 <==>	exchange	exchange			Y	-5	1000	0	2
E00077	exchange for Tricosanoic acid	[e] : M00005 <==>	exchange	exchange			Y	-5	1000	0	2
E00083	exchange for Arachidonyl-CoA	[e] : C02249 <==>	exchange	exchange			N	0	1000	0	2
E00084	exchange for (5Z,8Z,11Z,14Z)-Icosatetraenoic acid	[e] : C00219 <==>	exchange	exchange			N	0	1000	0	2
E00085	exchange for Palmitoyl-CoA	[e] : C00154 <==>	exchange	exchange			N	0	1000	0	2
E00086	exchange for beta-D-Fructose	[e] : C02336 <==>	exchange	exchange			Y	-5	1000	0	2
E00087	exchange for NH3	[e] : C00014 <==>	exchange	exchange			Y	-5	1000	0	2
E00088	exchange for Dodecanoic acid	[e] : C02679 <==>	exchange	exchange			Y	-5	1000	0	2
E00089	exchange for Tetradecanoic acid	[e] : C06424 <==>	exchange	exchange			Y	-5	1000	0	2
E00090	exchange for Myristoleic acid	[e] : C08322 <==>	exchange	exchange			Y	-5	1000	0	2
E00091	exchange for Pentadecanoic acid	[e] : C16537 <==>	exchange	exchange			Y	-5	1000	0	2
E00092	exchange for Hexadecanoic acid	[e] : C00249 <==>	exchange	exchange			Y	-5	1000	0	2
E00093	exchange for (9Z)-Hexadecenoic acid	[e] : C08362 <==>	exchange	exchange			Y	-5	1000	0	2
E00094	exchange for (9E)-Octadecenoic acid	[e] : C01712 <==>	exchange	exchange			Y	-5	1000	0	2
E00096	exchange for Ferrocytochrome b5	[e] : C00999 <==>	exchange	exchange			Y	-5	1000	0	2
E00097	exchange for Reduced acceptor	[e] : C00030 <==>	exchange	exchange			Y	-5	1000	0	2
E00098	exchange for Oxygen	[e] : C00007 <==>	exchange	exchange			Y	-1000	1000	0	2
E00099	exchange for H+	[e] : C00080 <==>	exchange	exchange			Y	-1000	1000	0	2
E00100	exchange for H2O	[e] : C00001 <==>	exchange	exchange			Y	-1000	1000	0	2
E00897	exchange for Hydrogen sulfide	[e] : C00283 <==>	exchange	exchange			Y	-5	1000	0	2
T00001	transport for L-Alanine	C00080[c] + C00041[c] <==> C00080[e] + C00041[e]	transport	Transport			Y	-1000	1000	0	2
T00002	transport for L-Arginine	C00080[c] + C00062[c] <==> C00080[e] + C00062[e]	transport	Transport			Y	-1000	1000	0	2
T00003	transport for L-Asparagine	C00080[c] + C00152[c] <==> C00080[e] + C00152[e]	transport	Transport			Y	-1000	1000	0	2
T00004	transport for L-Aspartate	C00080[c] + C00049[c] <==> C00080[e] + C00049[e]	transport	Transport			Y	-1000	1000	0	2
T00005	transport for L-Cysteine	C00080[c] + C00097[c] <==> C00080[e] + C00097[e]	transport	Transport			Y	-1000	1000	0	2
T00006	transport for L-Glutamine	C00080[c] + C00064[c] <==> C00080[e] + C00064[e]	transport	Transport			Y	-1000	1000	0	2
T00007	transport for L-Glutamate	C00080[c] + C00025[c] <==> C00080[e] + C00025[e]	transport	Transport			Y	-1000	1000	0	2
T00008	transport for Glycine	C00080[c] + C00037[c] <==> C00080[e] + C00037[e]	transport	Transport			Y	-1000	1000	0	2
T00009	transport for L-Histidine	C00080[c] + C00135[c] <==> C00080[e] + C00135[e]	transport	Transport			Y	-1000	1000	0	2
T00010	transport for L-Isoleucine	C00080[c] + C00407[c] <==> C00080[e] + C00407[e]	transport	Transport			Y	-1000	1000	0	2
T00011	transport for L-Leucine	C00080[c] + C00123[c] <==> C00080[e] + C00123[e]	transport	Transport			Y	-1000	1000	0	2
T00012	transport for L-Lysine	C00080[c] + C00047[c] <==> C00080[e] + C00047[e]	transport	Transport			Y	-1000	1000	0	2
T00013	transport for L-Methionine	C00080[c] + C00073[c] <==> C00080[e] + C00073[e]	transport	Transport			Y	-1000	1000	0	2
T00014	transport for L-Phenylalanine	C00080[c] + C00079[c] <==> C00080[e] + C00079[e]	transport	Transport			Y	-1000	1000	0	2
T00015	transport for L-Proline	C00080[c] + C00148[c] <==> C00080[e] + C00148[e]	transport	Transport			Y	-1000	1000	0	2
T00016	transport for L-Serine	C00080[c] + C00065[c] <==> C00080[e] + C00065[e]	transport	Transport			Y	-1000	1000	0	2
T00017	transport for L-Threonine	C00080[c] + C00188[c] <==> C00080[e] + C00188[e]	transport	Transport			Y	-1000	1000	0	2
T00018	transport for L-Tryptophan	C00080[c] + C00078[c] <==> C00080[e] + C00078[e]	transport	Transport			Y	-1000	1000	0	2
T00019	transport for L-Tyrosine	C00080[c] + C00082[c] <==> C00080[e] + C00082[e]	transport	Transport			Y	-1000	1000	0	2
T00020	transport for L-Valine	C00080[c] + C00183[c] <==> C00080[e] + C00183[e]	transport	Transport			Y	-1000	1000	0	2
T00021	transport for alpha-D-Glucose	C04261[c] + C00267[c] <==> C00615[e] + C00668[e]	transport	Transport			Y	-1000	1000	0	2
T00023	transport for Manganese	C00034[c] <==> C00034[e]	transport	Transport			Y	-1000	1000	0	2
T00024	transport for Zinc cation	C00038[c] <==> C00038[e]	transport	Transport			Y	-1000	1000	0	2
T00025	transport for Copper	C00070[c] <==> C00070[e]	transport	Transport			Y	-1000	1000	0	2
T00026	transport for Calcium cation	C00076[c] <==> C00076[e]	transport	Transport			Y	-1000	1000	0	2
T00027	transport for Potassium cation	C00238[c] <==> C00238[e]	transport	Transport			Y	-1000	1000	0	2
T00028	transport for Magnesium cation	C00305[c] <==> C00305[e]	transport	Transport			Y	-1000	1000	0	2
T00029	transport for Sodium cation	C01330[c] <==> C01330[e]	transport	Transport			Y	-1000	1000	0	2
T00030	transport for Selenium	C01529[c] <==> C01529[e]	transport	Transport			Y	-1000	1000	0	2
T00031	transport for Phosphorus	C06262[c] <==> C06262[e]	transport	Transport			Y	-1000	1000	0	2
T00032	transport for Fe3+	C14819[c] <==> C14819[e]	transport	Transport			Y	-1000	1000	0	2
T00033	transport for (8Z,11Z,14Z,17Z)-Icosatetraenoyl-CoA	C00080[c] + C16164[c] <==> C00080[e] + C16164[e]	transport	Transport			Y	-1000	1000	0	2
T00034	transport for (5Z,8Z,11Z,14Z,17Z)-Icosapentaenoyl-CoA	C00080[c] + C16165[c] <==> C00080[e] + C16165[e]	transport	Transport			Y	-1000	1000	0	2
T00035	transport for (9Z,12Z,15Z)-Octadecatrienoyl-CoA	C00080[c] + C16162[c] <==> C00080[e] + C16162[e]	transport	Transport			Y	-1000	1000	0	2
T00036	transport for (9Z,12Z,15Z)-Octadecatrienoic acid	C00080[c] + C06427[c] <==> C00080[e] + C06427[e]	transport	Transport			Y	-1000	1000	0	2
T00037	transport for (11Z,14Z,17Z)-Icosatrienoyl-CoA	C00080[c] + C16179[c] <==> C00080[e] + C16179[e]	transport	Transport			Y	-1000	1000	0	2
T00038	transport for Icosatrienoic acid	C00080[c] + C16522[c] <==> C00080[e] + C16522[e]	transport	Transport			Y	-1000	1000	0	2
T00039	transport for (5Z,8Z,11Z,14Z,17Z)-Icosapentaenoic acid	C00080[c] + C06428[c] <==> C00080[e] + C06428[e]	transport	Transport			Y	-1000	1000	0	2
T00040	transport for (7Z,10Z,13Z,16Z,19Z)-Docosapentaenoyl-CoA	C00080[c] + C16166[c] <==> C00080[e] + C16166[e]	transport	Transport			Y	-1000	1000	0	2
T00041	transport for (4Z,7Z,10Z,13Z,16Z,19Z)-Docosahexaenoic acid	C00080[c] + C06429[c] <==> C00080[e] + C06429[e]	transport	Transport			Y	-1000	1000	0	2
T00042	transport for Linoleoyl-CoA	C00080[c] + C02050[c] <==> C00080[e] + C02050[e]	transport	Transport			Y	-1000	1000	0	2
T00043	transport for Linoleate	C00080[c] + C01595[c] <==> C00080[e] + C01595[e]	transport	Transport			Y	-1000	1000	0	2
T00044	transport for Cholesterol	C00187[c] <==> C00187[e]	transport	Transport			Y	-1000	1000	0	2
T00045	transport for Ecdysone	C00477[c] <==> C00477[e]	transport	Transport			Y	-1000	1000	0	2
T00048	transport for Icosadienoic acid	C00080[c] + C16525[c] <==> C00080[e] + C16525[e]	transport	Transport			Y	-1000	1000	0	2
T00049	transport for (11Z,14Z)-Icosadienoyl-CoA	C00080[c] + C16180[c] <==> C00080[e] + C16180[e]	transport	Transport			Y	-1000	1000	0	2
T00051	transport for 13,16-Docosadienoic acid	C00080[c] + C16533[c] <==> C00080[e] + C16533[e]	transport	Transport			Y	-1000	1000	0	2
T00052	transport for (13Z,16Z)-Docosadi-13,16-enoyl-CoA	C00080[c] + C16645[c] <==> C00080[e] + C16645[e]	transport	Transport			Y	-1000	1000	0	2
T00053	transport for (6Z,9Z,12Z)-Octadecatrienoic acid	C00080[c] + C06426[c] <==> C00080[e] + C06426[e]	transport	Transport			Y	-1000	1000	0	2
T00054	transport for gamma-Linolenoyl-CoA	C00080[c] + C03035[c] <==> C00080[e] + C03035[e]	transport	Transport			Y	-1000	1000	0	2
T00055	transport for (8Z,11Z,14Z)-Icosatrienoic acid	C00080[c] + C03242[c] <==> C00080[e] + C03242[e]	transport	Transport			Y	-1000	1000	0	2
T00056	transport for 8,11,14-Eicosatrienoyl-CoA	C00080[c] + C03595[c] <==> C00080[e] + C03595[e]	transport	Transport			Y	-1000	1000	0	2
T00057	transport for Stearoyl-CoA	C00080[c] + C00412[c] <==> C00080[e] + C00412[e]	transport	Transport			Y	-1000	1000	0	2
T00058	transport for Octadecanoic acid	C00080[c] + C01530[c] <==> C00080[e] + C01530[e]	transport	Transport			Y	-1000	1000	0	2
T00059	transport for Icosanoic acid	C00080[c] + C06425[c] <==> C00080[e] + C06425[e]	transport	Transport			Y	-1000	1000	0	2
T00060	transport for Eicosanoyl-CoA	C00080[c] + C02041[c] <==> C00080[e] + C02041[e]	transport	Transport			Y	-1000	1000	0	2
T00061	transport for Docosanoic acid	C00080[c] + C08281[c] <==> C00080[e] + C08281[e]	transport	Transport			Y	-1000	1000	0	2
T00062	transport for Docosanoyl-CoA	C00080[c] + C16528[c] <==> C00080[e] + C16528[e]	transport	Transport			Y	-1000	1000	0	2
T00063	transport for Tetracosanoic acid	C00080[c] + C08320[c] <==> C00080[e] + C08320[e]	transport	Transport			Y	-1000	1000	0	2
T00064	transport for Tetracosanoyl-CoA	C00080[c] + C16529[c] <==> C00080[e] + C16529[e]	transport	Transport			Y	-1000	1000	0	2
T00065	transport for Icosenoic acid	C00080[c] + C16526[c] <==> C00080[e] + C16526[e]	transport	Transport			Y	-1000	1000	0	2
T00066	transport for Icosenoyl-CoA	C00080[c] + C16530[c] <==> C00080[e] + C16530[e]	transport	Transport			Y	-1000	1000	0	2
T00067	transport for Erucic acid	C00080[c] + C08316[c] <==> C00080[e] + C08316[e]	transport	Transport			Y	-1000	1000	0	2
T00068	transport for Docosenoyl-CoA	C00080[c] + C16531[c] <==> C00080[e] + C16531[e]	transport	Transport			Y	-1000	1000	0	2
T00069	transport for (15Z)-Tetracosenoic acid	C00080[c] + C08323[c] <==> C00080[e] + C08323[e]	transport	Transport			Y	-1000	1000	0	2
T00070	transport for Tetracosenoyl-CoA	C00080[c] + C16532[c] <==> C00080[e] + C16532[e]	transport	Transport			Y	-1000	1000	0	2
T00071	transport for (9Z)-Octadecenoic acid	C00080[c] + C00712[c] <==> C00080[e] + C00712[e]	transport	Transport			Y	-1000	1000	0	2
T00072	transport for Oleoyl-CoA	C00080[c] + C00510[c] <==> C00080[e] + C00510[e]	transport	Transport			Y	-1000	1000	0	2
T00073	transport for Tridecylic acid	C00080[c] + M00001[c] <==> C00080[e] + M00001[e]	transport	Transport			Y	-1000	1000	0	2
T00074	transport for Margaric acid	C00080[c] + M00002[c] <==> C00080[e] + M00002[e]	transport	Transport			Y	-1000	1000	0	2
T00075	transport for cis-10- Heptadecenoic acid	C00080[c] + M00003[c] <==> C00080[e] + M00003[e]	transport	Transport			Y	-1000	1000	0	2
T00076	transport for HeneiCosanoic acid	C00080[c] + M00004[c] <==> C00080[e] + M00004[e]	transport	Transport			Y	-1000	1000	0	2
T00077	transport for Tricosanoic acid	C00080[c] + M00005[c] <==> C00080[e] + M00005[e]	transport	Transport			Y	-1000	1000	0	2
T00083	transport for Arachidonyl-CoA	C00080[c] + C02249[c] <==> C00080[e] + C02249[e]	transport	Transport			Y	-1000	1000	0	2
T00084	transport for (5Z,8Z,11Z,14Z)-Icosatetraenoic acid	C00080[c] + C00219[c] <==> C00080[e] + C00219[e]	transport	Transport			Y	-1000	1000	0	2
T00085	transport for Palmitoyl-CoA	C00080[c] + C00154[c] <==> C00080[e] + C00154[e]	transport	Transport			Y	-1000	1000	0	2
T00086	transport for beta-D-Fructose	C00080[c] + C02336[c] <==> C00080[e] + C02336[e]	transport	Transport			Y	-1000	1000	0	2
T00087	transport for NH3	C00080[c] + C00014[c] <==> C00080[e] + C00014[e]	transport	Transport			Y	-1000	1000	0	2
T00088	transport for Dodecanoic acid	C00080[c] + C02679[c] <==> C00080[e] + C02679[e]	transport	Transport			Y	-1000	1000	0	2
T00089	transport for Tetradecanoic acid	C00080[c] + C06424[c] <==> C00080[e] + C06424[e]	transport	Transport			Y	-1000	1000	0	2
[truncated: 11 more rows]

## Sheet: metabolites
compounds	Name	Formula
C00001	H2O; Water	H2O
[truncated: 1,523 more rows]
