# Supplementary material for: Reconstruction of Eriocheir sinensis Y-organ Genome-Scale Metabolic Network and Differential Analysis After Eyestalk Ablation
Source: Front Genet. 2020 Sep 25;11:532492. doi: 10.3389/fgene.2020.532492 (PMC7545369; doi:10.3389/fgene.2020.532492)
Supplement: Supplementary File 4 — Results of network decomposition. [file Table_3.XLSX]

## Sheet: Sheet1
reaction	module number
R00010	23
R00014	16
R00028	23
R00036	3
R00042	26
R00084	3
R00086	22
R00089	22
R00093	18
R00100	22
R00103	22
R00104	22
R00111	17
R00112	22
R00114	18
R00115	4
R00122	22
R00124	22
R00127	22
R00130	12
R00132	20
R00134	20
R00135	17
R00137	22
R00155	25
R00156	25
R00157	25
R00158	25
R00159	25
R00173	24
R00177	6
R00178	17
R00181	22
R00183	22
R00184	22
R00185	22
R00187	22
R00190	22
R00191	22
R00192	6
R00197	16
R00199	16
R00200	16
R00212	16
R00216	16
R00220	16
R00233	15
R00235	15
R00236	22
R00238	15
R00245	18
R00251	18
R00253	18
R00257	22
R00258	16
R00261	18
R00264	18
R00267	22
R00268	18
R00269	18
R00274	4
R00277	24
R00278	24
R00286	23
R00287	25
R00289	23
R00291	23
R00292	23
R00299	23
R00310	3
R00316	15
R00317	15
R00328	19
R00330	19
R00332	19
R00335	19
R00342	18
R00344	16
R00348	18
R00351	15
R00352	15
R00355	18
R00359	18
R00366	20
R00367	20
R00369	20
R00371	20
R00372	20
R00375	25
R00376	25
R00377	25
R00378	25
R00410	15
R00414	24
R00416	24
R00428	19
R00429	19
R00430	19
R00431	18
R00432	14
R00434	19
R00435	22
R00437	22
R00438	25
R00439	19
R00440	25
R00441	19
R00442	25
R00443	25
R00462	9
R00465	20
R00482	18
R00483	18
R00485	18
R00486	18
R00489	18
R00494	4
R00497	4
R00503	10
R00507	22
R00508	22
R00509	22
R00511	25
R00512	25
R00513	25
R00514	25
R00516	25
R00517	25
R00519	20
R00527	20
R00529	22
R00533	22
R00554	17
R00557	17
R00558	17
R00559	17
R00569	25
R00570	25
R00571	25
R00573	25
R00575	18
R00578	18
R00582	16
R00585	16
R00588	20
R00602	5
R00611	20
R00615	14
R00616	14
R00619	14
R00621	18
R00648	6
R00658	16
R00667	17
R00669	17
R00670	17
R00671	17
R00672	17
R00678	2
R00679	2
R00685	2
R00694	26
R00697	26
R00698	26
R00699	26
R00703	16
R00705	15
R00707	18
R00708	18
R00709	18
R00710	15
R00711	15
R00713	14
R00716	9
R00717	20
R00719	22
R00722	22
R00726	18
R00727	14
R00731	26
R00734	26
R00736	26
R00737	26
R00742	15
R00746	15
R00747	15
R00751	20
R00754	15
R00762	24
R00765	24
R00768	24
R00782	16
R00801	23
R00802	23
R00829	15
R00830	20
R00833	14
R00842	24
R00847	24
R00848	24
R00851	24
R00866	23
R00867	23
R00875	23
R00878	23
R00885	23
R00888	23
R00891	16
R00892	16
R00893	16
R00894	16
R00896	16
R00897	15
R00899	20
R00901	16
R00904	15
R00905	15
R00908	15
R00924	13
R00926	13
R00927	13
R00935	13
R00936	5
R00939	5
R00941	5
R00942	5
R00943	5
R00944	20
R00945	20
R00946	6
R00955	10
R00959	23
R00961	22
R00962	25
R00963	25
R00964	25
R00966	25
R00967	25
R00968	25
R00969	25
R00970	25
R00978	25
R00996	13
R01000	13
R01001	16
R01013	24
R01015	24
R01021	24
R01026	24
R01030	24
R01036	24
R01041	24
R01048	24
R01049	24
R01051	24
R01053	24
R01054	24
R01055	25
R01056	24
R01057	24
R01061	24
R01066	24
R01067	24
R01068	24
R01069	24
R01070	24
R01074	15
R01082	14
R01083	22
R01086	17
R01090	14
R01092	10
R01093	10
R01095	10
R01113	16
R01121	26
R01123	26
R01126	22
R01127	22
R01130	19
R01132	22
R01134	19
R01135	22
R01137	25
R01138	25
R01151	17
R01155	17
R01175	9
R01184	23
R01185	23
R01186	23
R01187	23
R01199	13
R01201	24
R01206	24
R01221	20
R01227	19
R01229	19
R01230	19
R01231	19
R01232	19
R01234	19
R01242	22
R01246	17
R01248	17
R01249	17
R01251	17
R01252	17
R01253	17
R01255	17
R01262	4
R01267	18
R01271	22
R01274	8
R01278	8
R01279	8
R01280	8
R01281	8
R01286	6
R01290	6
R01295	26
R01297	26
R01299	26
R01308	26
R01310	27
R01315	21
R01317	21
R01318	21
R01325	15
R01326	23
R01346	18
R01351	24
R01354	13
R01357	15
R01361	15
R01364	14
R01372	26
R01378	26
R01383	23
R01384	23
R01388	24
R01392	24
R01394	24
R01397	18
R01402	22
R01415	25
R01421	26
R01426	26
R01430	24
R01431	24
R01432	24
R01451	7
R01454	7
R01456	7
R01457	7
R01462	7
R01468	27
R01470	27
R01478	23
R01481	23
R01483	23
R01494	10
R01498	10
R01500	10
R01512	16
R01513	16
R01518	16
R01519	24
R01528	24
R01529	24
R01547	25
R01548	25
R01549	25
R01560	22
R01561	22
R01565	20
R01567	25
R01569	25
R01570	25
R01590	21
R01593	21
R01595	21
R01600	23
R01602	23
R01611	15
R01616	26
R01618	22
R01624	15
R01626	15
R01639	24
R01641	24
R01648	17
R01658	26
R01663	25
R01665	25
R01676	19
R01678	10
R01682	16
R01687	16
R01706	8
R01710	24
R01711	24
R01724	22
R01728	26
R01736	4
R01737	24
R01752	24
R01768	19
R01769	22
R01786	23
R01787	23
R01790	23
R01791	23
R01795	26
R01799	27
R01811	24
R01814	2
R01818	23
R01819	23
R01827	24
R01829	24
R01830	23
R01857	25
R01858	25
R01859	13
R01863	22
R01868	18
R01880	25
R01890	10
R01899	18
R01900	18
R01911	24
R01920	17
R01923	8
R01926	27
R01933	9
R01939	9
R01940	9
R01942	6
R01943	26
R01954	17
R01959	20
R01961	24
R01968	25
R01969	19
R01975	15
R01986	17
R01987	17
R01989	17
R01990	17
R01993	18
R02003	26
R02018	25
R02021	22
R02022	25
R02024	25
R02027	27
R02030	25
R02035	24
R02038	27
R02051	27
R02052	27
R02053	27
R02054	27
R02057	27
R02059	24
R02078	26
R02080	11
R02082	14
R02085	14
R02088	25
R02090	25
R02091	25
R02092	25
R02093	25
R02094	25
R02095	25
R02096	25
R02097	25
R02098	25
R02099	25
R02100	25
R02101	25
R02103	19
R02106	19
R02107	19
R02108	23
R02109	23
R02110	23
R02111	23
R02114	21
R02142	19
R02147	19
R02164	14
R02173	2
R02194	26
R02199	14
R02221	26
R02222	21
R02237	5
R02239	27
R02240	27
R02241	27
R02245	22
R02250	27
R02251	27
R02253	26
R02255	26
R02269	15
R02294	22
R02295	22
R02297	19
R02300	5
R02301	5
R02313	9
R02320	16
R02323	22
R02326	25
R02327	25
R02328	23
R02331	25
R02332	25
R02334	24
R02335	24
R02363	26
R02371	25
R02372	25
R02379	26
R02382	26
R02383	11
R02389	23
R02408	16
R02433	16
R02457	17
R02464	27
R02466	16
R02480	3
R02484	25
R02487	9
R02488	9
R02494	24
R02514	26
R02516	26
R02519	14
R02521	26
R02530	4
R02532	11
R02533	11
R02534	11
R02535	11
R02536	26
R02537	26
R02540	26
R02541	10
R02549	17
R02556	22
R02557	22
R02568	24
R02569	15
R02570	14
R02571	9
R02619	16
R02640	23
R02661	14
R02662	14
R02678	2
R02687	27
R02695	26
R02697	26
R02698	26
R02701	2
R02719	19
R02720	19
R02723	7
R02731	23
R02736	23
R02737	23
R02739	23
R02740	23
R02746	21
R02747	24
R02748	22
R02750	24
R02756	24
R02757	27
R02765	13
R02805	19
R02824	4
R02869	17
R02894	17
R02908	2
R02918	26
R02919	11
R02920	11
R02933	23
R02940	15
R02957	23
R02971	12
R02976	12
R02978	12
R03004	22
R03005	22
R03018	16
R03024	26
R03026	9
R03036	12
R03038	16
R03045	13
R03055	25
R03057	21
R03058	21
R03059	21
R03096	2
R03098	9
R03102	9
R03103	9
R03104	16
R03105	16
R03146	20
R03157	13
R03158	13
R03165	3
R03166	3
R03167	4
R03172	14
R03174	14
R03180	17
R03181	14
R03183	23
R03197	3
R03208	26
R03220	3
R03222	3
R03232	23
R03236	24
R03237	24
R03238	24
R03239	24
R03245	22
R03249	17
R03270	14
R03291	17
R03293	17
R03295	17
R03296	17
R03300	26
R03302	26
R03304	26
R03310	7
R03316	14
R03321	23
R03341	26
R03342	26
R03346	22
R03353	7
R03355	10
R03360	27
R03361	27
R03362	27
R03366	26
R03393	27
R03394	27
R03409	19
R03415	27
R03416	27
R03417	27
R03425	20
R03427	27
R03428	27
R03429	27
R03430	27
R03433	27
R03434	27
R03435	27
R03437	27
R03469	27
R03478	22
R03479	22
R03522	4
R03534	18
R03539	26
R03595	13
R03596	13
R03599	13
R03617	10
R03646	17
R03647	18
R03648	18
R03650	16
R03652	18
R03654	20
R03656	14
R03657	14
R03658	9
R03659	6
R03660	26
R03661	17
R03662	16
R03663	20
R03664	2
R03724	7
R03814	21
R03815	20
R03867	21
R03869	13
R03905	18
R03909	27
R03915	4
R03916	4
R03920	23
R03953	26
R03970	18
R03971	18
R03973	26
R03991	8
R04014	27
R04016	10
R04017	10
R04019	10
R04095	14
R04097	14
R04125	5
R04137	14
R04138	14
R04144	20
R04152	15
R04162	27
R04173	16
R04188	13
R04203	14
R04204	14
R04208	1
R04209	1
R04212	18
R04221	17
R04224	14
R04230	16
R04231	16
R04241	18
R04242	5
R04247	15
R04300	11
R04301	11
R04311	24
R04325	5
R04326	5
R04355	15
R04372	23
R04378	1
R04385	15
R04386	15
R04390	9
R04404	27
R04420	6
R04432	13
R04444	17
R04445	17
R04452	27
R04463	18
R04480	27
R04513	27
R04533	15
R04543	8
R04544	8
R04545	27
R04559	1
R04560	1
R04566	27
R04568	27
R04571	27
R04591	1
R04666	25
R04711	26
R04725	27
R04726	27
R04737	8
R04738	8
R04770	13
R04773	13
R04779	23
R04780	23
R04804	7
R04856	10
R04858	6
R04863	9
R04864	27
R04880	11
R04881	11
R04882	11
R04883	11
R04887	11
R04888	11
R04889	11
R04890	11
R04891	11
R04892	11
R04893	11
R04894	11
R04903	2
R04920	15
R04931	13
R04965	27
R04967	27
R04968	27
R04970	8
R04972	3
R04979	23
R05000	26
R05046	19
R05048	19
R05050	17
R05064	13
R05066	13
R05105	10
R05145	15
R05196	23
R05233	15
R05234	15
R05237	15
R05238	15
R05258	26
R05286	20
R05287	20
R05371	15
R05372	15
R05509	13
R05551	13
R05556	26
R05577	18
R05578	18
R05579	9
R05590	26
R05616	26
R05703	7
R05794	25
R05795	27
R05800	22
R05801	22
R05802	27
R05803	27
R05916	27
R05920	27
R05921	27
R05922	27
R05924	27
R06171	20
R06364	27
R06513	23
R06516	27
R06517	12
R06519	10
R06520	12
R06521	27
R06522	10
R06578	26
R06583	26
R06584	26
R06590	24
R06601	19
R06604	19
R06614	18
R06728	26
R06745	26
R06790	26
R06865	26
R06870	27
R06895	3
R06982	5
R06983	20
R06987	13
R07034	21
R07035	21
R07038	21
R07042	21
R07043	21
R07044	21
R07045	21
R07046	21
R07048	21
R07050	21
R07051	21
R07052	21
R07054	21
R07055	21
R07056	21
R07064	21
R07096	20
R07098	20
R07099	20
R07100	20
R07101	20
R07104	20
R07105	20
R07106	20
R07107	20
R07215	7
R07229	13
R07299	27
R07324	23
R07363	6
R07364	6
R07376	27
R07377	21
R07379	27
R07380	27
R07384	27
R07385	27
R07387	27
R07388	27
R07389	27
R07390	27
R07392	6
R07395	6
R07396	6
R07411	3
R07436	26
R07440	26
R07456	24
R07460	16
R07498	7
R07507	7
R07599	14
R07600	14
R07601	14
R07602	14
R07603	14
R07604	14
R07618	14
R07758	8
R07759	8
R07760	8
R07761	21
R07826	26
R07859	21
R07861	21
R07922	19
R07933	21
R07937	12
R07942	19
R07943	19
R07945	19
R07957	19
R07958	19
R07959	19
R07960	19
R07961	19
R07962	19
R07965	19
R07966	19
R07969	19
R07970	19
R07977	19
R07978	19
R07979	19
R08093	14
R08094	14
R08095	14
R08132	7
R08159	27
R08162	27
R08174	21
R08176	21
R08177	21
R08178	21
R08181	21
R08182	21
R08183	21
R08184	12
R08185	12
R08186	12
R08187	12
R08188	12
R08190	12
R08192	12
R08193	24
R08218	13
R08223	13
R08224	13
R08273	12
R08276	20
R08286	20
R08287	20
R08359	9
R08615	23
R08618	6
R08639	23
R08714	17
R08770	26
R08771	26
R08815	26
R08969	10
R09034	27
R09036	27
R09085	23
R09086	23
R09093	5
R09094	20
R09099	16
R09144	20
R09145	20
R09149	20
R09150	20
R09151	20
R09152	20
R09158	20
R09245	26
R09249	26
R09365	13
R09366	13
R09371	13
R09372	13
R11007	7
R11008	7
R11043	21
R11059	21
T00001	16
T00002	17
T00003	18
T00004	18
T00005	16
T00006	18
T00007	18
T00008	20
T00010	14
T00011	14
T00012	9
T00013	6
T00014	26
T00015	17
T00016	16
T00017	20
T00018	2
T00019	26
T00021	23
T00035	21
T00036	21
T00037	12
T00038	12
T00042	21
T00043	21
T00048	12
T00049	12
T00051	12
T00052	12
T00053	21
T00054	21
T00055	21
T00056	21
T00057	21
T00058	21
T00061	12
T00062	12
T00063	12
T00064	12
T00065	12
T00066	12
T00067	12
T00068	12
T00069	12
T00070	12
T00071	21
T00072	21
T00083	21
T00084	21
T00085	8
T00086	23
T00087	18
T00088	27
T00089	27
T00092	8
T00093	27
